# Supplementary material for: Diverse “roof shaped” chiral diamidophosphites: palladium coordination and catalytic applications
Source: Royal Society of Chemistry journal article supplement (doi:10.1039/d1nj05143a), 2021-12-14
Supplement: d1nj05143a1.pdf [file d1nj05143a1.pdf]

## SUPPLEMENTARY INFORMATION

### Diverse “roof shape” chiral diamidophosphites: Palladium coordination and catalytic application

Konstantin N. Gavrilov, Ilya V. Chuchelkin, Vladislav K. Gavrilov, Sergey V. Zheglov, Ilya D. Firsin, Valeria M. Trunina, Ilya A. Zamilatskov, Vladimir S. Tyurin, Victor A. Tafeenko, Vladimir V. Chernyshev, Vladislav S. Zimarev and Nataliya S. Goulioukina

---

#### TABLE OF CONTENTS

---

|                                                       |      |
|-------------------------------------------------------|------|
| General                                               | S2   |
| Experimental section                                  | S5   |
| Crystal data for new ligands                          | S27  |
| Calculated structures of palladium(ii) complexes      | S32  |
| Catalytic results                                     | S33  |
| HPLC traces for the Pd-catalyzed allylic substitution | S40  |
| NMR and mass spectra                                  | S44  |
| References                                            | S118 |

---

## GENERAL

$^{31}\text{P}\{^1\text{H}\}$ ,  $^{13}\text{C}\{^1\text{H}\}$  and  $^1\text{H}$  NMR spectra were recorded with Bruker Avance 600 (242.9 MHz for  $^{31}\text{P}\{^1\text{H}\}$ , 150.9 MHz for  $^{13}\text{C}\{^1\text{H}\}$  and 600.1 MHz for  $^1\text{H}$ ) and Varian Inova 500 (202.3 MHz for  $^{31}\text{P}\{^1\text{H}\}$ , 125.7 MHz for  $^{13}\text{C}\{^1\text{H}\}$  and 499.8 MHz for  $^1\text{H}$ ) instruments.  $^1\text{H}$  and  $^{13}\text{C}\{^1\text{H}\}$  NMR signals were attributed using APT, DEPT,  $^1\text{H},^1\text{H} - \text{COSY}$ ,  $^1\text{H},^1\text{H} - \text{TOCSY}$ ,  $^1\text{H},^1\text{H} - \text{NOESY}$ ,  $^{13}\text{C},^1\text{H} - \text{HSQC}$  and  $^{13}\text{C},^1\text{H} - \text{HMBC}$  techniques. The chemical shifts are referenced to residual solvent peaks ( $^1\text{H}$ ,  $^{13}\text{C}\{^1\text{H}\}$  NMR) or  $\text{H}_3\text{PO}_4$  85% as external standard ( $^{31}\text{P}$  NMR). Data are represented as follows: chemical shift, multiplicity (br = broad, s = singlet, d = doublet, t = triplet, m = multiplet, vt = virtual triplet, q = quartet). Diffusion-ordered NMR spectroscopy (DOSY) was performed on a Bruker Avance 600 spectrometer equipped with a direct Quattro Nucleus Probe (QNP) and a z-gradient coil controlled by a Great 1/10 gradient unit, by using the double-stimulated echo pulse sequence `dstepg3s` from the Bruker TopSpin 4.0.7 program package without spinning in  $\text{CD}_2\text{Cl}_2$  at 303K. The residual resonance of  $\text{CH}_2\text{Cl}_2$  was used as internal standard. Hydrodynamic radii were calculated from diffusion coefficients using the Stokes-Einstein equation with correction factor 1 (assuming the spherical particle). The structures of molecules were calculated using the Gaussian 09W<sup>[1]</sup> software package with density functional theory (DFT) method implementing the hybrid correlation-exchange functional B3LYP.<sup>[2]</sup> For mononuclear complex  $[\text{Pd}(\text{allyl})(\mathbf{L1a})]\text{BF}_4$  the 3-21G basis set was used for geometry optimizations and the 6-31G(d) basis set was used for volume and energy calculations, electrons of palladium atom were rendered by the LaNL2DZ basis set with an effective potential for internal electrons. The solvent effects were accounted by the polarizable continuum model (PCM). Geometries of dinuclear complex  $[\text{Pd}(\text{allyl})(\mathbf{L5a})]_2(\text{BF}_4)_2$  were optimized using the semi-empirical PM6 method and molecular volumes were computed by the DFT method with the 3-21G basis set. Mass spectra were recorded on a Bruker FT-ICR-MS solarix XR 15T spectrometer (ESI-TOF). HPLC analyses were performed on a Stayer instrument using Kromasil 5-CelluCoat and Daicel Chiralcel OD-H columns. Optical rotations were measured with an Atago AP-300 polarimeter. Elemental analyses were performed on a CHN-microanalyzer Carlo Erba EA1108 CHNS-O.

The molecular structures of **L1a** and **L1b** were confirmed by single-crystal X-ray structure determinations. The diffraction intensities of **L1a** and **L1b** were collected on STOE diffractometer equipped with Pilatus100K detector and focusing mirror collimation ( $\text{Cu K}\alpha_1$  radiation,  $\lambda = 1.54086 \text{ \AA}$ ) in a rotation mode. STOE X-Area software was used for cells refinement and data reduction. Data collection and image processing was performed with X-Area 1.67.<sup>[3]</sup> Intensity data were scaled with LANA (part of X-Area) in order to minimize differences of intensities of symmetry-equivalent reflections (multi-scan method). The structures were solved and refined with SHELX<sup>[4]</sup> programs. The non-hydrogen atoms were refined by using the anisotropic full matrix least-square procedure. H-atoms were placed in calculated positions and refined in a riding mode. The crystal data, data collection and refinement

## GENERAL

parameters for **L1a** and **L1b** are given in Table S2. The molecular structures of **L1a** and **L1b** are shown in Figure 2, prepared with DIAMOND<sup>[5]</sup> software.

The crystal structures of **L4** and **L5a** were determined from powder data measured at room temperature on the beamline ID22 of the European Synchrotron Radiation Facility (ESRF, Grenoble, France). The instrument is equipped with a cryogenically cooled double-crystal Si 111 monochromator and Si 111 analyzers. Each powder sample was loaded into a 1 mm diameter borosilicate thin-walled glass capillary which was rotated during measurements at a rate of 1200 rpm to improve the powder averaging. The powder patterns of **L4** and **L5a** were indexed in orthorhombic and monoclinic unit cells, respectively, and based on the systematic extinction rules the chiral space groups  $P2_12_12_1$  and  $P2_1$  were selected for the structure determination. The crystal structures were solved with the use of simulated annealing technique<sup>[6]</sup> and refined with the program MRIA<sup>[7]</sup> following the known procedures described by us earlier.<sup>[8-11]</sup> In the refinement, geometrical parameters of the rigid ferrocene fragment were kept close to the reported values (see, for example<sup>[12-14]</sup>). All non-H atoms were isotropically refined. H atoms were placed in calculated positions and not refined. The experimental and calculated diffraction profiles after the final bond-restrained Rietveld refinement are shown in Figures S1 and S2. The crystal data, data collection and refinement parameters for **L4** and **L5a** are given in Table S3. The molecular structures of **L4** and **L5a** are shown on Figure 3, prepared with *Mercury*.<sup>[15]</sup>

All reactions were carried out under a dry argon atmosphere in flame-dried glassware and in freshly dried and distilled solvents. For example, toluene and tetrahydrofuran were freshly distilled from sodium benzophenone ketyl before use; dichloromethane was distilled from NaH. Triethylamine and pyrrolidine were distilled over KOH and then over a small amount of LiAlH<sub>4</sub> before use. PCl<sub>3</sub> was freshly distilled. Thin-layer chromatography was performed on E. Merck pre-coated silica gel 60 F254 and Macherey-Nagel Alugram Alox N/UV<sub>254</sub> plates. Column chromatography was performed using silica gel MN Kieselgel 60 (230 – 400 mesh) and MN-Aluminum oxide, basic, Brockmann Activity 1. For the preparation of analytically pure samples, the obtained compounds were additionally dried in high vacuum (10<sup>-3</sup> Torr) for 16 h.

The following compounds were synthesized according to literature procedures: (11*S*,12*S*)-bis(hydroxymethyl)-9,10-dihydro-9,10-ethanoanthracene (**1**),<sup>[16]</sup> (5*S*)-2-chloro-3-phenyl-1,3-diaza-2-phosphabicyclo[3.3.0]octane and (5*R*)-2-chloro-3-phenyl-1,3-diaza-2-phosphabicyclo[3.3.0]octane ((*S*<sub>C</sub>)-**7** and (*R*<sub>C</sub>)-**7**),<sup>[17]</sup> (1*S*,2*S*)-*N*<sup>1</sup>,*N*<sup>2</sup>-diphenylcyclohexane-1,2-diamine and (1*R*,2*R*)-*N*<sup>1</sup>,*N*<sup>2</sup>-diphenylcyclohexane-1,2-diamine ((*S*,*S*)-**S1** and (*R*,*R*)-**S1**),<sup>[18]</sup> [Pd(allyl)Cl]<sub>2</sub> and (*E*)-1,3-diphenylallyl acetate (**9**),<sup>[19]</sup> ethyl 2-acetamido-3-oxobutanoate (**14**),<sup>[20]</sup> 2-(diethoxyphosphoryl)-1-phenylallyl acetate (**18**).<sup>[21]</sup> (1*S*,2*S*)- and (1*R*,2*R*)-Cyclohexane-1,2-diamine (starting compound for the preparation of **S1**) was

## GENERAL

resolved from the racemic mixture using (*S,S*)- and (*R,R*)-tartaric acid, respectively, following the known procedure.<sup>[22]</sup> Pd-catalyzed allylic alkylation of **9** with dimethyl malonate, its amination with pyrrolidine or phthalimide, allylic alkylation of cinnamyl acetate (**11**) with ethyl 2-oxocyclohexane-1-carboxylate (**12**), ethyl 2-acetamido-3-oxobutanoate (**14**) or 2-acetyl-3,4-dihydronaphthalen-1(2*H*)-one (**16**), allylic amination of **18** with aniline were performed according to the appropriate procedures.<sup>[9,17,21,23-25]</sup>

*p*-Toluenesulfonyl chloride, thiophenol, ferrocenecarboxaldehyde, racemic cyclohexane-1,2-diamine, dimethyl malonate, BSA (*N,O*-bis(trimethylsilyl)acetamide), cinnamyl acetate (**11**), ethyl 2-oxocyclohexane-1-carboxylate (**12**) and 2-acetyl-3,4-dihydronaphthalen-1(2*H*)-one (**16**) were purchased from Aldrich and Acros Organics.

## EXPERIMENTAL SECTION

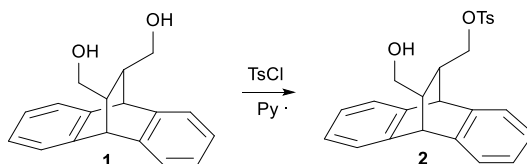

**Procedure for the Preparation of Monotosylate 2:** A solution of *p*-toluenesulfonyl chloride (4.39 g, 23 mmol) in pyridine (10 mL) was added at 0 °C to a stirred solution of diol **1** (5.86 g, 22 mmol) in pyridine (15 mL) over 5 min. The reaction mixture was stirred for 16 h at 0 °C.  $\text{CH}_2\text{Cl}_2$  (60 mL) and ice (4.0 g) were then added. The organic layer was washed in turn with 4 M HCl (25 mL), saturated  $\text{NaHCO}_3$  (20 mL) and brine (20 mL), dried over anhydrous  $\text{Na}_2\text{SO}_4$  and concentrated in vacuum (40 Torr). The residue was dried for 30 min at 10 Torr and chromatographed on  $\text{Al}_2\text{O}_3$  (hexane/EtOAc = 2/1).

((11*S*,12*S*)-12-((Tosyloxy)methyl)-9,10-dihydro-9,10-ethanoanthracen-11-yl)methanol (**2**): White viscous foam that solidified on standing, yield 4.26 g (46 %).  $^1\text{H}$  NMR (600.1 MHz,  $\text{CDCl}_3$ , 30 °C):  $\delta$  = 1.42-1.45 (m, 1H;  $\text{CHCHCH}_2\text{OH}$ ), 1.58 (br.s, 1H;  $\text{CHCHCH}_2\text{OH}$ ), 1.72-1.76 (m, 1H;  $\text{CHCHCH}_2\text{OTs}$ ), 2.47 (s, 3H;  $\text{CH}_3$ ), 3.11-3.14 (dd,  $^2J(\text{H,H}) = 10.4$  Hz,  $^3J(\text{H,H}) = 8.7$  Hz, 1H;  $\text{CHCHCH}_2\text{OH}$ ), 3.28-3.30 (dd,  $^2J(\text{H,H}) = 10.4$  Hz,  $^3J(\text{H,H}) = 6.3$  Hz, 1H;  $\text{CHCHCH}_2\text{OH}$ ), 3.38 (t,  $^2J(\text{H,H}) \sim ^3J(\text{H,H}) = 9.8$  Hz, 1H;  $\text{CHCHCH}_2\text{OTs}$ ), 3.81-3.84 (dd,  $^2J(\text{H,H}) = 9.6$  Hz,  $^3J(\text{H,H}) = 5.3$  Hz, 1H;  $\text{CHCHCH}_2\text{OTs}$ ), 4.27 (d,  $^3J(\text{H,H}) = 2.2$  Hz, 1H;  $\text{CHCHCH}_2\text{OTs}$ ), 4.29 (d,  $^3J(\text{H,H}) = 2.3$  Hz, 1H;  $\text{CHCHCH}_2\text{OH}$ ), 6.97-7.01 (m, 2H;  $\text{CH}(\text{Ar})$ ), 7.07-7.10 (m, 1H;  $\text{CH}(\text{Ar})$ ), 7.10-7.14 (m, 2H;  $\text{CH}(\text{Ar})$ ), 7.22-7.27 (m, 3H;  $\text{CH}(\text{Ar})$ ), 7.35 (br.d,  $^3J(\text{H,H}) \sim 8.0$  Hz, 2H;  $\text{CH}(\text{Ts})$ ), 7.77 (br.d,  $^3J(\text{H,H}) \sim 8.3$  Hz, 2H;  $\text{CH}(\text{Ts})$ ) ppm.  $^{13}\text{C}\{^1\text{H}\}$  NMR (150.9 MHz,  $\text{CDCl}_3$ , 30 °C):  $\delta$  = 21.59 ( $\text{CH}_3$ ), 42.29 ( $\text{CHCHCH}_2\text{OTs}$ ), 45.04 ( $\text{CHCHCH}_2\text{OTs}$ ), 45.15 ( $\text{CHCHCH}_2\text{OH}$ ), 45.30 ( $\text{CHCHCH}_2\text{OH}$ ), 65.23 ( $\text{CHCHCH}_2\text{OH}$ ), 72.16 ( $\text{CHCHCH}_2\text{OTs}$ ), 123.34 ( $\text{CH}(\text{Ar})$ ), 123.64 ( $\text{CH}(\text{Ar})$ ), 125.23 ( $\text{CH}(\text{Ar})$ ), 125.50 ( $\text{CH}(\text{Ar})$ ), 125.76 ( $\text{CH}(\text{Ar})$ ), 125.98 ( $\text{CH}(\text{Ar})$ ), 126.24 ( $\text{CH}(\text{Ar})$ ), 126.26 ( $\text{CH}(\text{Ar})$ ), 127.91 ( $\text{CH}(\text{Ts})$ ), 129.87 ( $\text{CH}(\text{Ts})$ ), 132.90 ( $\text{C}(\text{Ts})$ ), 139.62 ( $\text{C}(\text{Ar})$ ), 140.40 ( $\text{C}(\text{Ar})$ ), 142.44 ( $\text{C}(\text{Ar})$ ), 143.16 ( $\text{C}(\text{Ar})$ ), 144.82 ( $\text{C}(\text{Ts})$ ) ppm.  $\text{C}_{25}\text{H}_{24}\text{O}_4\text{S}$  (420.14): calcd. C, 71.41; H, 5.75; found C 71.56, H 5.70.

## EXPERIMENTAL SECTION

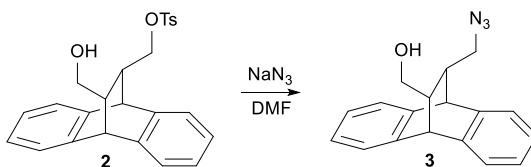

**Procedure for the Preparation of Azido Alcohol 3:** Monotosylate **2** (3.28 g, 7.8 mmol) was dissolved in DMF (30 mL) and NaN<sub>3</sub> (1.01 g, 15.6 mmol) was added. The reaction mixture was stirred for 12 h at 100 °C. The DMF was removed under reduced pressure (1 Torr) and EtOAc (30 mL) and water (15 mL) were added to the residue. The aqueous phase was further extracted with EtOAc (2 x 30 mL). The combined organic phases was dried over anhydrous Na<sub>2</sub>SO<sub>4</sub> and concentrated in vacuum (40 Torr). The residue was dried for 30 min at 10 Torr and chromatographed on SiO<sub>2</sub> (hexane/EtOAc = 2/1).

((11*S*,12*S*)-12-(Azidomethyl)-9,10-dihydro-9,10-ethanoanthracen-11-yl)methanol (**3**): White solid, yield 1.95 g (86 %). <sup>1</sup>H NMR (600.1 MHz, CDCl<sub>3</sub>, 27 °C): δ = 1.56-1.64 (m, 2H; CH<sub>2</sub>CH), 1.70 (br.s, 1H; OH), 2.87-2.93 (dd, <sup>2</sup>*J*(H,H) = 12.0 Hz, <sup>3</sup>*J*(H,H) = 9.0 Hz, 1H; CH<sub>2</sub>CH), 3.06-3.10 (dd, <sup>2</sup>*J*(H,H) = 12.0 Hz, <sup>3</sup>*J*(H,H) = 6.3 Hz, 1H; CH<sub>2</sub>CH), 3.14-3.19 (dd, <sup>2</sup>*J*(H,H) = 10.3 Hz, <sup>3</sup>*J*(H,H) = 8.3 Hz, 1H; CH<sub>2</sub>CH), 3.31-3.35 (dd, <sup>2</sup>*J*(H,H) = 10.3 Hz, <sup>3</sup>*J*(H,H) = 6.0 Hz, 1H; CH<sub>2</sub>CH), 4.28 (d, <sup>3</sup>*J*(H,H) = 2.1 Hz, 1H; CH), 4.35 (d, <sup>3</sup>*J*(H,H) = 2.1 Hz, 1H; CH), 7.11-7.19 (m, 4H; CH(Ar)), 7.29-7.33 (m, 4H; CH(Ar)) ppm. <sup>13</sup>C{<sup>1</sup>H} NMR (150.9 MHz, CDCl<sub>3</sub>, 27 °C): δ = 42.95 (CH), 45.66 (CH), 46.30(CH), 46.52 (CH), 55.41 (CH<sub>2</sub>), 65.49 (CH<sub>2</sub>), 123.54 (CH(Ar)), 123.56 (CH(Ar)), 125.21 (CH(Ar)), 125.40 (CH(Ar)), 125.89 (CH(Ar)), 125.94 (CH(Ar)), 126.19 (CH(Ar)), 126.32 (CH(Ar)), 140.06 (C(Ar)), 140.45 (C(Ar)), 142.77 (C(Ar)), 143.19 (C(Ar)) ppm. All spectroscopic data for compound **3** were in good agreement with the literature.<sup>[26]</sup>

## EXPERIMENTAL SECTION

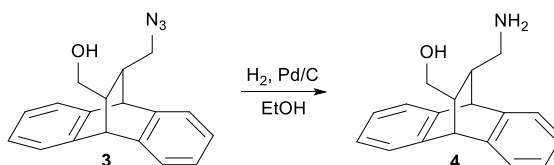

**Procedure for the Preparation of Amino Alcohol 4:** Azido alcohol **3** (1.46 g, 5.02 mmol) was dissolved in ethanol (30 mL) and hydrogenated with 10% Pd/C (0.17 g) at room temperature in a hydrogen atmosphere for 5 h. The reaction mixture was filtered through a thin layer of Celite and concentrated in vacuum (40 Torr). The residue was dried for 30 min at 10 Torr and then for 12 h at  $10^{-3}$  Torr.

((11*S*,12*S*)-12-(Aminomethyl)-9,10-dihydro-9,10-ethanoanthracen-11-yl)methanol (**4**): White solid, yield 1.29 g (97 %). (499.9 MHz,  $\text{CDCl}_3$ , ambient temperature):  $\delta$  = 1.56-1.61 (m, 1H;  $\text{CHCH}_2\text{NH}_2$ ), 1.70-1.74 (m, 1H;  $\text{CHCH}_2\text{OH}$ ), 1.89-1.93 (dd,  $^2J(\text{H,H}) = 12.4$  Hz,  $^3J(\text{H,H}) = 10.9$  Hz, 1H;  $\text{CHCH}_2\text{NH}_2$ ), 2.39 (br.s, 3H;  $\text{CHCH}_2\text{OH}$  and  $\text{CHCH}_2\text{NH}_2$ ), 2.87 (t,  $^2J(\text{H,H}) = ^3J(\text{H,H}) = 9.8$  Hz, 1H;  $\text{CHCH}_2\text{OH}$ ), 2.90-2.93 (dd,  $^2J(\text{H,H}) = 12.4$  Hz,  $^3J(\text{H,H}) = 4.3$  Hz, 1H;  $\text{CHCH}_2\text{NH}_2$ ), 3.62-3.65 (dd,  $^2J(\text{H,H}) = 9.8$  Hz,  $^3J(\text{H,H}) = 4.8$  Hz, 1H;  $\text{CHCH}_2\text{OH}$ ), 4.12 (d,  $^3J(\text{H,H}) = 1.6$  Hz, 1H;  $\text{CHCH}_2\text{NH}_2$ ), 4.15 (d,  $^3J(\text{H,H}) = 1.6$  Hz, 1H;  $\text{CHCH}_2\text{OH}$ ), 7.08-7.14 (m, 4H; CH(Ar)), 7.23-7.28 (m, 4H; CH(Ar)) ppm.  $^{13}\text{C}\{^1\text{H}\}$  NMR (125.7 MHz,  $\text{CDCl}_3$ , ambient temperature):  $\delta$  = 46.10 ( $\text{CHCH}_2\text{NH}_2$ ), 47.34 ( $\text{CHCH}_2\text{OH}$ ), 47.85 ( $\text{CHCH}_2\text{NH}_2$ ), 48.07 ( $\text{CHCH}_2\text{NH}_2$ ), 48.18 ( $\text{CHCH}_2\text{OH}$ ), 66.44 ( $\text{CHCH}_2\text{OH}$ ), 123.03 (CH(Ar)), 123.12 (CH(Ar)), 124.88 (CH(Ar)), 125.56 (CH(Ar)), 125.68 (CH(Ar)), 125.95 (CH(Ar)), 126.00 (CH(Ar)), 140.62 (C(Ar)), 140.66 (C(Ar)), 143.75 (C(Ar)), 143.97 (C(Ar)) ppm.  $\text{C}_{18}\text{H}_{19}\text{NO}$  (265.15): calcd. C, 81.47; H, 7.22; N, 5.28; found C, 81.75; H, 7.30; N, 5.17.

## EXPERIMENTAL SECTION

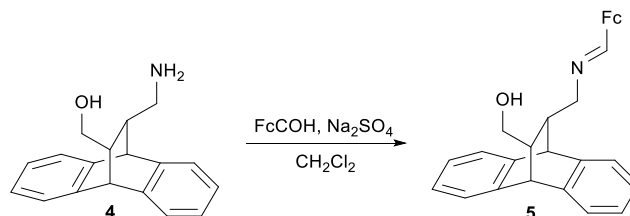

**Procedure for the Preparation of Imino Alcohol 5:** Amino alcohol **4** (1.33 g, 5 mmol) was dissolved in CH<sub>2</sub>Cl<sub>2</sub> (10 mL). Ferrocenecarboxaldehyde (1.07 g, 5 mmol) and Na<sub>2</sub>SO<sub>4</sub> (1.42 g, 10 mmol) were added to this solution with stirring, and the reaction mixture was heated under reflux for 4 h. After the mixture had cooled to room temperature, the Na<sub>2</sub>SO<sub>4</sub> was filtered off and washed with CH<sub>2</sub>Cl<sub>2</sub>. The filtrate was passed through a short plug of SiO<sub>2</sub> and concentrated in vacuum (40 Torr). The residue was dried for 30 min at 10 Torr and crystallized from toluene.

((11*S*,12*S*)-12-(((*E*)-Ferrocenylidene)amino)methyl)-9,10-dihydro-9,10-ethanoanthracen-11-yl)methanol (**5**): Orange-red solid, yield 1.89 g (82 %). <sup>1</sup>H NMR (600.1 MHz, Toluene-*d*<sub>8</sub>, 30 °C): δ = 1.89-1.94 (m, 1H; CHCH<sub>2</sub>N), 1.91-1.96 (m, 1H; CHCH<sub>2</sub>OH), 2.67-2.71 (m, 1H; CHCH<sub>2</sub>N), 3.07 (t, <sup>2</sup>*J*(H,H) = <sup>3</sup>*J*(H,H) = 9.7 Hz, 1H; CHCH<sub>2</sub>OH), 3.18-3.21 (dd, <sup>2</sup>*J*(H,H) = 12.8 Hz, <sup>3</sup>*J*(H,H) = 4.3 Hz, 1H; CHCH<sub>2</sub>N), 3.71-3.73 (dd, <sup>2</sup>*J*(H,H) = 9.7 Hz, <sup>3</sup>*J*(H,H) = 4.7 Hz, 1H; CHCH<sub>2</sub>OH), 3.95-3.96 (m, 1H; CHCH<sub>2</sub>OH), 3.98 (s, 5H; C<sub>5</sub>H<sub>5</sub>(Fc)), 4.00 (d, <sup>3</sup>*J*(H,H) = 1.4 Hz, 1H; CHCH<sub>2</sub>N), 4.04-4.06 (m, 2H; CH(Fc)), 4.12 (br.s, 1H; CHCH<sub>2</sub>OH), 4.47 (br.s, 1H; CH(Fc)), 4.54 (br.s, 1H; CH(Fc)), 6.95-7.05 (m, 4H; CH(Ar)), 7.08-7.14 (m, 4H; CH(Ar)), 7.65 (s, 1H; FcCH) ppm. <sup>13</sup>C{<sup>1</sup>H} NMR (150.9 MHz, Toluene-*d*<sub>8</sub>, 30 °C): δ = 46.36 (CHCH<sub>2</sub>N), 47.85 (CHCH<sub>2</sub>OH), 48.14 (CHCH<sub>2</sub>OH), 48.71 (CHCH<sub>2</sub>N), 65.57 (CHCH<sub>2</sub>N), 67.25 (CHCH<sub>2</sub>OH), 68.79 (CH(Fc)), 69.08 (CH(Fc)), 69.53 (C<sub>5</sub>H<sub>5</sub>(Fc)), 70.68 (CH(Fc)), 70.79 (CH(Fc)), 80.27 (C(Fc)), 123.37 (CH(Ar)), 123.54 (CH(Ar)), 125.18 (CH(Ar)), 125.19 (CH(Ar)), 125.74 (CH(Ar)), 125.94 (CH(Ar)), 126.15 (CH(Ar)), 126.29 (CH(Ar)), 141.16 (C(Ar)), 141.30 (C(Ar)), 144.04 (C(Ar)), 144.61 (C(Ar)), 162.17 (FcCH) ppm. C<sub>29</sub>H<sub>27</sub>FeNO (461.14): calcd. C, 75.49; H, 5.90; N, 3.04; found C, 75.69; H, 5.94; N, 3.12.



## EXPERIMENTAL SECTION

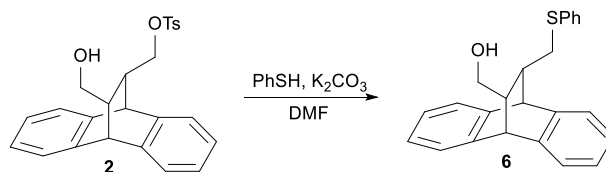

**Procedure for the Preparation of Thioether Alcohol 6:** Monotosylate **2** (3.49 g, 8.3 mmol) was dissolved in DMF (25 mL), thiophenol (1.7 mL, 16.6 mmol) and  $K_2CO_3$  (2.29 g, 16.6 mmol) were added. The reaction mixture was stirred for 12 h at room temperature, diluted with water (50 mL), and then extracted with hexane/EtOAc = 2/1 (2 x 50 mL). The combined organic extracts was washed with brine (50 mL), dried over anhydrous  $Na_2SO_4$  and concentrated in vacuum (40 Torr). The residue was dried for 30 min at 10 Torr and chromatographed on  $SiO_2$  (hexane/AcOEt = 3/1).

((11*S*,12*S*)-12-((Phenylthio)methyl)-9,10-dihydro-9,10-ethanoanthracen-11-yl)methanol (**6**): White foam, yield 2.41 g (81 %).  $^1H$  NMR (600.1 MHz,  $CDCl_3$ , 30 °C):  $\delta$  = 1.56-1.60 (br.m, 2H;  $CHCHCH_2OH$  and  $CHCHCH_2S$ ), 1.70-1.74 (m, 1H;  $CHCHCH_2OH$ ), 2.59-2.62 (dd,  $^2J(H,H) = 13.0$  Hz,  $^3J(H,H) = 8.4$  Hz, 1H;  $CHCHCH_2S$ ), 2.66-2.69 (dd,  $^2J(H,H) = 13.0$  Hz,  $^3J(H,H) = 6.8$  Hz, 1H;  $CHCHCH_2S$ ), 3.02-3.06 (dd,  $^2J(H,H) = 10.3$  Hz,  $^3J(H,H) = 9.2$  Hz, 1H;  $CHCHCH_2OH$ ), 3.37-3.40 (dd,  $^2J(H,H) = 10.4$  Hz,  $^3J(H,H) = 5.9$  Hz, 1H;  $CHCHCH_2OH$ ), 4.36 (d,  $^3J(H,H) = 2.3$  Hz, 1H;  $CHCHCH_2OH$ ), 4.37 (d,  $^3J(H,H) = 2.2$  Hz, 1H;  $CHCHCH_2S$ ), 7.08-7.17 (m, 5H; CH(Ar) and CH(Ph)), 7.24-7.32 (m, 8H; CH(Ar) and CH(Ph)) ppm.  $^{13}C\{^1H\}$  NMR (150.9 MHz,  $CDCl_3$ , 30 °C):  $\delta$  = 39.22 ( $CHCHCH_2S$ ), 42.24 ( $CHCHCH_2S$ ), 45.87 ( $CHCHCH_2OH$ ), 47.84 ( $CHCHCH_2S$ ), 49.07 ( $CHCHCH_2OH$ ), 65.64 ( $CHCHCH_2OH$ ), 123.49 (CH(Ar)), 123.53 (CH(Ar)), 125.18 (CH(Ar)), 125.51 (CH(Ar)), 125.72 (CH(Ar)), 125.80 (CH(Ar)), 126.03 (CH(Ar)), 126.19 (*p*-CH(Ph)), 128.94 (*o*-CH(Ph)), 129.16 (*m*-CH(Ph)), 136.16 (*p*-C(Ph)), 140.51 (C(Ar)), 140.61 (C(Ar)), 143.19 (C(Ar)), 143.28 (C(Ar)) ppm.  $C_{24}H_{22}OS$  (358.14): calcd. C, 80.41; H, 6.19; found C, 80.58; H, 6.13.

## EXPERIMENTAL SECTION

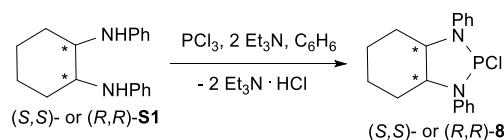

**General Procedure for the Preparation of Phosphorylating Reagent (*S,S*)-8 and (*R,R*)-8:** A solution of the 1,2-diamine (*S,S*)-S1 or (*R,R*)-S1 (1.09 g, 4.1 mmol) in benzene (20 mL) was added dropwise at 0 °C over 15 min to a vigorously stirred solution of PCl<sub>3</sub> (0.36 mL, 4.1 mmol) and Et<sub>3</sub>N (1.14 mL, 8.2 mmol) in benzene (40 mL). The mixture was then briefly heated to boiling point and cooled down to 20 °C. Solid Et<sub>3</sub>N·HCl was filtered off, and the filtrate was concentrated in vacuum (40 Torr). The residue was dried in vacuum (10<sup>-3</sup> Torr) for 8 h.

(1*R*,5*R*)-3-chloro-2,4-diphenyl-2,4-diaza-3-phospha-bicyclo[3.4.0]nonane ((*R,R*)-8): Yellowish solid, yield 1.30 g (96 %). <sup>1</sup>H NMR (499.9 MHz, CDCl<sub>3</sub>, ambient temperature): δ = 1.25-1.45 (br.m, 2H; CH<sub>2</sub>CH), 1.33-1.53 (br.m, 2H; CH<sub>2</sub>), 1.91-1.92 (br.m, 2H; CH<sub>2</sub>), 2.33 (br.s, 1H; CH<sub>2</sub>CH), 2.46 (br.s, 1H; CH<sub>2</sub>CH), 3.65 (br.s, 1H; CH<sub>2</sub>CH), 3.94 (br.s, 1H; CH<sub>2</sub>CH), 7.03-7.16 (br.m, 2H; *p*-CH(Ph)), 7.16-7.28 (br.m, 4H; *o*-CH(Ph)), 7.31-7.46 (br.m, 4H; *m*-CH(Ph)) ppm. <sup>13</sup>C{<sup>1</sup>H} NMR (125.7 MHz, CDCl<sub>3</sub>, ambient temperature): δ = 24.32 (s; CH<sub>2</sub>), 28.57 (s; CH<sub>2</sub>CH), 28.99 (s; CH<sub>2</sub>CH), 65.77 (br.s; CH<sub>2</sub>CH), 66.08 (br.s; CH<sub>2</sub>CH), 119.69 (br.s; *o*-CH(Ph)), 124.76 (br.s; *o*-CH(Ph)), 123.00 (br.s; *p*-CH(Ph)), 125.38 (br.s; *p*-CH(Ph)), 129.22 (s; *m*-CH(Ph)), 139.37 (br.s; *i*-C(Ph)), 141.81 (br.s; *i*-C(Ph)) ppm. <sup>31</sup>P{<sup>1</sup>H} NMR (202.4 MHz, CDCl<sub>3</sub>, ambient temperature): δ = 156.19 (s) ppm.

(1*S*,5*S*)-3-chloro-2,4-diphenyl-2,4-diaza-3-phospha-bicyclo[3.4.0]nonane ((*S,S*)-8): Yellowish solid, yield 1.22 g (90 %). The <sup>1</sup>H, <sup>13</sup>C{<sup>1</sup>H} and <sup>31</sup>P{<sup>1</sup>H} NMR signals match the corresponding signals for (*R,R*)-8.

**General Procedure for the Preparation of Ligands:** The relevant compound **1** (1 mmol) or **2,5,6** (2 mmol) was added in one portion to a vigorously stirred solution of the appropriate phosphorylating reagent (*S<sub>C</sub>*)-7, (*R<sub>C</sub>*)-7), (*S,S*)-8 or (*R,R*)-8 (2 mmol) and Et<sub>3</sub>N (0.56 mL, 4 mmol) in toluene (15 mL) at 20 °C. The mixture that obtained was stirred for 24 h at 20 °C. The resulting suspension was filtered through a short plug of SiO<sub>2</sub>/Al<sub>2</sub>O<sub>3</sub>, the column was washed with toluene (2 x 15 mL), and the solvent was evaporated under reduced pressure (40 Torr). Products were additionally purified by flash chromatography on SiO<sub>2</sub> (toluene). The obtained ligands were dried in vacuum (10<sup>-3</sup> Torr).

(1*S*,12*S*)-Bis(((2*R*,5*S*)-3-phenyl-1,3-diaza-2-phospha-bicyclo[3.3.0]octyloxy)methyl)-9,10-dihydro-9,10-ethanoanthracene (**L1a**): White solid, yield 0.63 g (94 %). <sup>1</sup>H NMR (600.1 MHz, CDCl<sub>3</sub>, 30 °C): δ = 1.25-1.29 (m, 2H; CHCH<sub>2</sub>CH<sub>2</sub>O), 1.50-1.55 (m, 2H; CH<sub>2</sub>), 1.69-1.77 (m, 2H; CH<sub>2</sub>CH<sub>2</sub>N), 1.78-1.84 (m, 2H; CH<sub>2</sub>CH<sub>2</sub>N), 1.90-1.96 (m, 2H; CH<sub>2</sub>), 2.82-2.87 (m, 2H; CHCH<sub>2</sub>CH<sub>2</sub>O), 3.01-3.04 (m, 2H; CH<sub>2</sub>CHN), 3.13-3.17

## EXPERIMENTAL SECTION

(m, 2H; CH<sub>2</sub>CH<sub>2</sub>N), 3.16-3.19 (m, 2H; CHCHCH<sub>2</sub>O), 3.41-3.44 (dd, <sup>2</sup>J(H,H) = 8.9 Hz, <sup>3</sup>J(H,H) = 7.3 Hz, 2H; CH<sub>2</sub>CHN), 3.54-3.60 (m, 2H; CH<sub>2</sub>CH<sub>2</sub>N), 3.70-3.75 (m, 2H; CH<sub>2</sub>CHN), 4.31 (d, <sup>3</sup>J(H,H) = 1.7 Hz, 2H; CHCHCH<sub>2</sub>O), 6.79-6.82 (tt, <sup>3</sup>J(H,H) = 7.3 Hz, <sup>4</sup>J(H,H) = 1.0 Hz, 2H; *p*-CH(Ph)), 6.93-6.95 (m, 4H; *o*-CH(Ph)), 7.04-7.08 (m, 2H; CHCHC(Ar)), 7.05-7.09 (m, 2H; CH'CH'C'(Ar)), 7.18-7.20 (m, 2H; CHCHC(Ar)), 7.18-7.21 (m, 4H; *m*-CH(Ph)), 7.23-7.25 (m, 2H; CH'CH'C'(Ar)) ppm. <sup>13</sup>C{<sup>1</sup>H} NMR (150.9 MHz, CDCl<sub>3</sub>, 30 °C): δ = 26.19 (d, <sup>3</sup>J(C,P) = 3.9 Hz; CH<sub>2</sub>CH<sub>2</sub>N), 32.09 (s; CH<sub>2</sub>), 43.93 (d, <sup>3</sup>J(C,P) = 2.7 Hz; CHCHCH<sub>2</sub>O), 45.42 (s; CHCHCH<sub>2</sub>O), 48.61 (d, <sup>2</sup>J(C,P) = 38.5 Hz; CH<sub>2</sub>CH<sub>2</sub>N), 54.61 (d, <sup>2</sup>J(C,P) = 7.2 Hz; CH<sub>2</sub>CHN), 63.17 (d, <sup>2</sup>J(C,P) = 8.7 Hz; CH<sub>2</sub>CHN), 64.35 (d, <sup>2</sup>J(C,P) = 4.3 Hz; CHCHCH<sub>2</sub>O), 114.70 (d, <sup>3</sup>J(C,P) = 11.8 Hz; *o*-CH(Ph)), 118.74 (s; *p*-CH(Ph)), 123.33 (s; CHCHC(Ar)), 125.09 (s; CHCHC(Ar)), 125.75 (s; CH'CH'C'(Ar)), 125.78 (s; CH'CH'C'(Ar)), 129.02 (s; *m*-CH(Ph)), 140.75 (s; CHCHC(Ar)), 143.61 (s; CH'CH'C'(Ar)), 145.65 (d, <sup>2</sup>J(C,P) = 15.7 Hz; C(Ph)) ppm. <sup>31</sup>P{<sup>1</sup>H} NMR (242.9 MHz, CDCl<sub>3</sub>, 30 °C): δ = 121.26 (s) ppm. C<sub>40</sub>H<sub>44</sub>N<sub>4</sub>O<sub>2</sub>P<sub>2</sub> (674.29): calcd. C 71.20, H 6.57, N 8.30; found C 71.34, H 6.63, N 8.24.

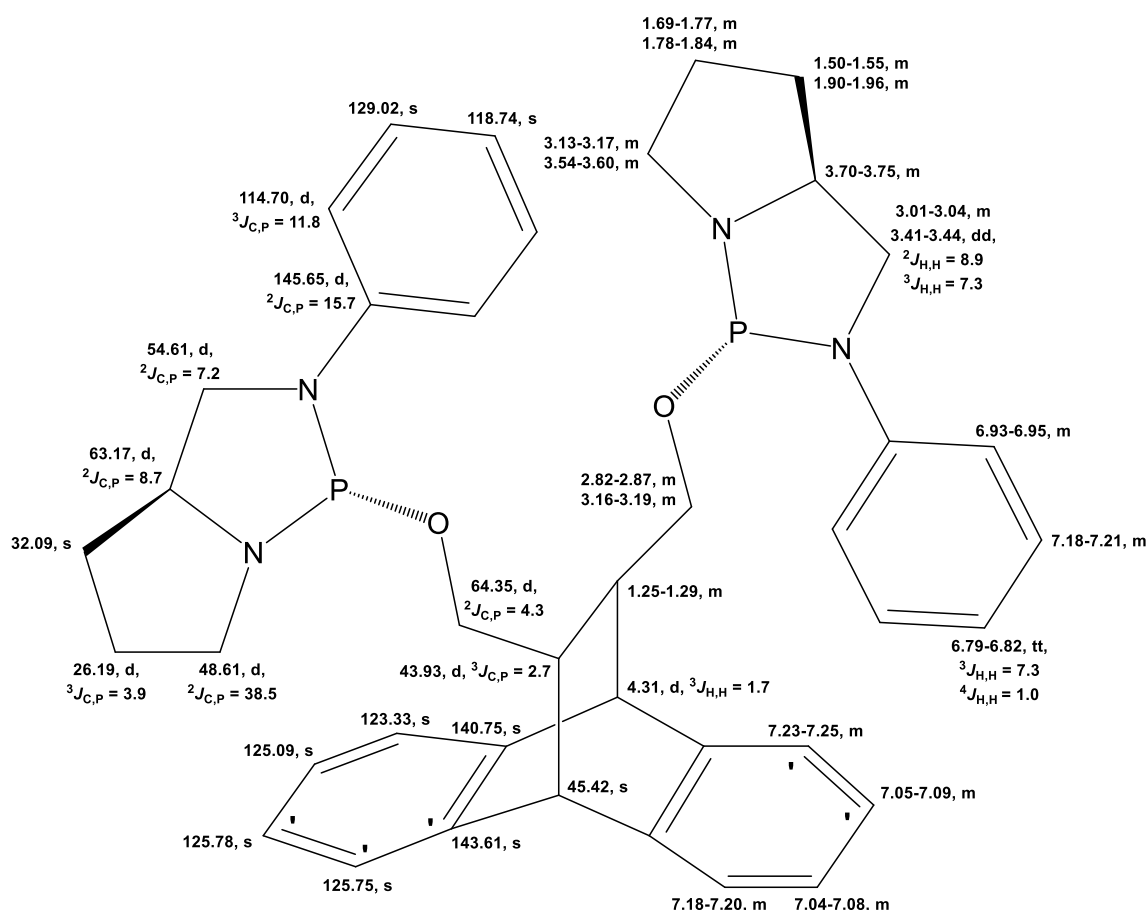

<sup>13</sup>C{<sup>1</sup>H} (left part of the picture) and <sup>1</sup>H (right part of the picture) NMR Signals Assignment for **L1a**.

## EXPERIMENTAL SECTION

(11*S*,12*S*)-Bis[(((2*S*,5*R*)-3-phenyl-1,3-diaza-2-phospha-bicyclo[3.3.0]octyloxy)methyl)-9,10-dihydro-9,10-ethanoanthracene (**L1b**): White solid, yield 0.57 g (85 %).  $^1\text{H}$  NMR (600.1 MHz,  $\text{CDCl}_3$ , 30 °C):  $\delta$  = 1.42-1.46 (m, 2H;  $\text{CHCH}_2\text{O}$ ), 1.55-1.60 (m, 2H;  $\text{CH}_2$ ), 1.72-1.79 (m, 2H;  $\text{CH}_2\text{CH}_2\text{N}$ ), 1.79-1.85 (m, 2H;  $\text{CH}_2\text{CH}_2\text{N}$ ), 1.95-2.01 (m, 2H;  $\text{CH}_2$ ), 2.84-2.88 (m, 2H;  $\text{CHCH}_2\text{O}$ ), 3.11-3.14 (m, 2H;  $\text{CH}_2\text{CHN}$ ), 3.14-3.20 (m, 2H;  $\text{CH}_2\text{CH}_2\text{N}$ ), 3.47-3.51 (m, 2H;  $\text{CHCH}_2\text{O}$ ), 3.54-3.59 (m, 2H;  $\text{CH}_2\text{CH}_2\text{N}$ ), 3.58-3.60 (dd,  $^2J(\text{H,H}) = 8.8$  Hz,  $^3J(\text{H,H}) = 7.4$  Hz, 2H;  $\text{CH}_2\text{CHN}$ ), 3.91-3.95 (m, 2H;  $\text{CH}_2\text{CHN}$ ), 4.17 (br.s, 2H;  $\text{CHCH}_2\text{O}$ ), 6.63 (br.d,  $^3J(\text{H,H}) \sim 7.3$  Hz, 2H;  $\text{CH}'\text{CH}'\text{C}'(\text{Ar})$ ), 6.80-6.83 (td,  $^3J(\text{H,H}) = 7.5$  Hz,  $^4J(\text{H,H}) = 1.1$  Hz, 2H;  $\text{CHCHC}(\text{Ar})$ ), 6.90 (t,  $^3J(\text{H,H}) = 7.3$  Hz, 2H; *p*-CH(Ph)), 6.98-7.00 (td,  $^3J(\text{H,H}) = 7.5$  Hz,  $^4J(\text{H,H}) = 1.1$  Hz, 2H;  $\text{CH}'\text{CH}'\text{C}'(\text{Ar})$ ), 7.07-7.08 (m, 4H; *o*-CH(Ph)), 7.16 (br.d,  $^3J(\text{H,H}) \sim 7.3$  Hz, 2H;  $\text{CHCHC}(\text{Ar})$ ), 7.29-7.33 (m, 4H; *m*-CH(Ph)) ppm.  $^{13}\text{C}\{^1\text{H}\}$  NMR (150.9 MHz,  $\text{CDCl}_3$ , 30 °C):  $\delta$  = 26.19 (d,  $^3J(\text{C,P}) = 3.9$  Hz;  $\text{CH}_2\text{CH}_2\text{N}$ ), 32.26 (s;  $\text{CH}_2$ ), 44.39 (d,  $^3J(\text{C,P}) = 2.2$  Hz;  $\text{CHCH}_2\text{O}$ ), 45.54 (s;  $\text{CHCH}_2\text{O}$ ), 48.76 (d,  $^2J(\text{C,P}) = 38.3$  Hz;  $\text{CH}_2\text{CH}_2\text{N}$ ), 54.86 (d,  $^2J(\text{C,P}) = 7.5$  Hz;  $\text{CH}_2\text{CHN}$ ), 63.32 (d,  $^2J(\text{C,P}) = 8.9$  Hz;  $\text{CH}_2\text{CHN}$ ), 64.49 (d,  $^2J(\text{C,P}) = 5.0$  Hz;  $\text{CHCH}_2\text{O}$ ), 114.92 (d,  $^3J(\text{C,P}) = 12.4$  Hz; *o*-CH(Ph)), 118.85 (s; *p*-CH(Ph)), 122.95 (s;  $\text{CHCHC}(\text{Ar})$ ), 125.30 (s;  $\text{CHCHC}(\text{Ar})$ ), 125.54 (s;  $\text{CH}'\text{CH}'\text{C}'(\text{Ar})$ ), 125.80 (s;  $\text{CH}'\text{CH}'\text{C}'(\text{Ar})$ ) 129.13 (s; *m*-CH(Ph)), 140.43 (s;  $\text{CHCHC}(\text{Ar})$ ), 143.60 (s;  $\text{CH}'\text{CH}'\text{C}'(\text{Ar})$ ), 145.73 (d,  $^2J(\text{C,P}) = 15.8$  Hz; C(Ph)) ppm.  $^{31}\text{P}\{^1\text{H}\}$  NMR (242.9 MHz,  $\text{CDCl}_3$ , 30 °C):  $\delta$  = 120.58 (s) ppm.  $\text{C}_{40}\text{H}_{44}\text{N}_4\text{O}_2\text{P}_2$  (674.29): calcd. C 71.20, H 6.57, N 8.30; found C 71.44, H 6.64, N 8.17.

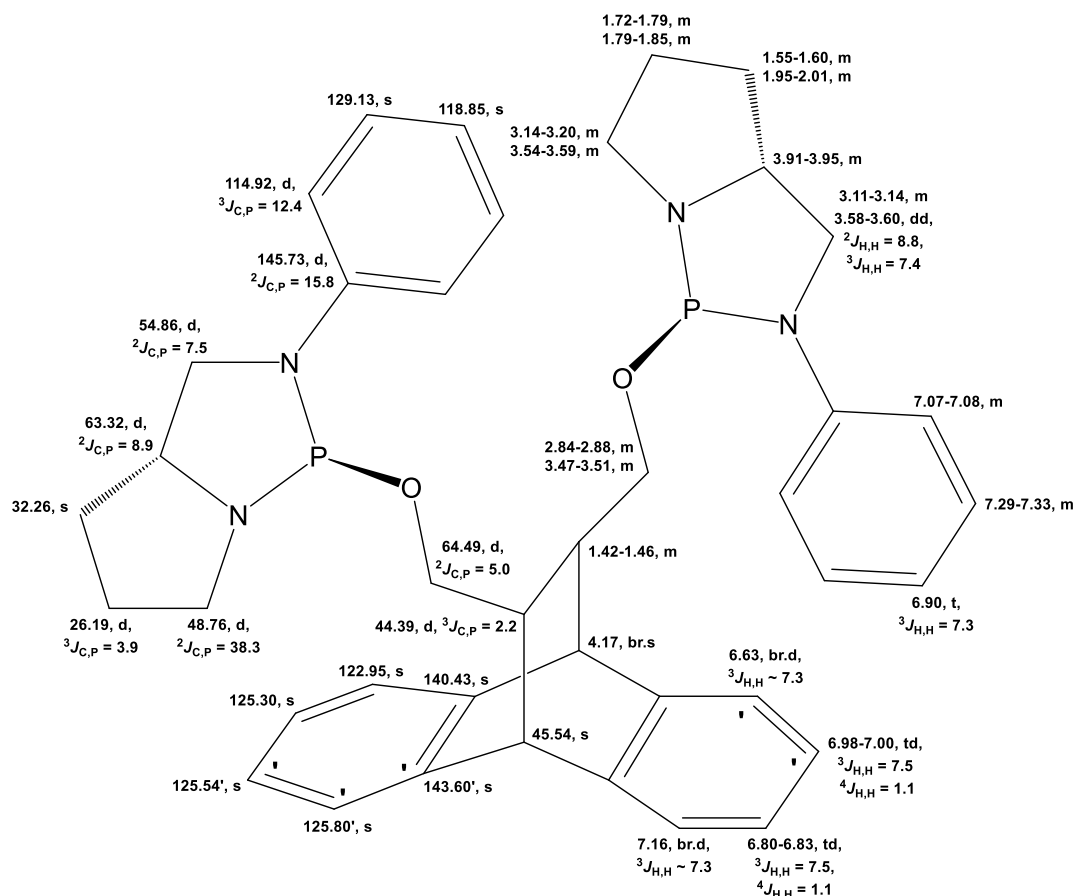

$^{13}\text{C}\{^1\text{H}\}$  (left part of the picture) and  $^1\text{H}$  (right part of the picture) NMR Signals Assignment for **L1b**.

## EXPERIMENTAL SECTION

(11*S*,12*S*)-Bis[(((1*S*,5*S*)-2,4-diphenyl-2,4-diaza-3-phospha-bicyclo[3.4.0]nonan-3-yloxy)methyl]-9,10-dihydro-9,10-ethanoanthracene (**L2a**): White solid, yield 0.81 g (95 %). <sup>1</sup>H NMR (600.1 MHz, CDCl<sub>3</sub>, 30 °C): δ = 0.92-0.98 (m, 2H; CH<sub>2</sub>CHN), 1.01-1.06 (br.m, 2H; CHCH<sub>2</sub>CH<sub>2</sub>O), 1.08-1.14 (m, 2H; CH<sub>2</sub>CHN), 1.27-1.36 (m, 4H; CH<sub>2</sub>), 1.64-1.67 (m, 2H; CH<sub>2</sub>), 1.80-1.84 (m, 2H; CH<sub>2</sub>), 2.21-2.23 (br.m, 2H; CH<sub>2</sub>CHN), 2.31-2.33 (br.m, 2H; CH<sub>2</sub>CHN), 2.69-2.78 (br.m, 2H; CHCHCH<sub>2</sub>O), 3.38-3.42 (m, 2H; CH<sub>2</sub>CHN), 3.45-3.50 (br.m, 2H; CHCHCH<sub>2</sub>O), 3.51-3.55 (m, 2H; CH<sub>2</sub>CHN), 4.22 (d, <sup>3</sup>J(H,H) = 3.3 Hz, 2H; CHCHCH<sub>2</sub>O), 6.94-6.96 (m, 2H; CH(Ar)), 6.97-7.01 (m, 4H; CH(Ar)), 6.98-7.02 (m, 2H; CH(Ar)), 7.02-7.08 (m, 10H; CH(Ar)), 7.09-7.13 (m, 2H; CH(Ar)), 7.23-7.26 (m, 4H; CH(Ar)), 7.27-7.31 (m, 4H; CH(Ar)) ppm. <sup>13</sup>C{<sup>1</sup>H} NMR (150.9 MHz, CDCl<sub>3</sub>, 30 °C): δ = 24.25 (s; CH<sub>2</sub>), 24.31 (s; CH<sub>2</sub>), 28.41 (s; CH<sub>2</sub>CHN), 29.11 (s; CH<sub>2</sub>CHN), 44.54 (br.s; CHCHCH<sub>2</sub>O), 45.20 (s; CHCHCH<sub>2</sub>O), 63.47 (d, <sup>2</sup>J(C,P) = 7.2 Hz; CH<sub>2</sub>CHN), 64.89 (d, <sup>2</sup>J(C,P) = 6.9 Hz; CH<sub>2</sub>CHN), 65.97 (d, <sup>2</sup>J(C,P) = 4.4 Hz; CHCHCH<sub>2</sub>O), 118.88 (d, <sup>3</sup>J(C,P) = 9.4 Hz; *o*-CH(Ph)), 121.44 (s; *p*-CH(Ph)), 122.63 (br.s; *p*-CH(Ph)), 122.72 (d, <sup>3</sup>J(C,P) = 6.6 Hz; *o*-CH(Ph)), 123.20 (s; CH(Ar)), 125.61 (s; CH(Ar)), 125.90 (s; CH(Ar)), 128.89 (s; *m*-CH(Ph)), 129.16 (s; *m*-CH(Ph)), 140.30 (s; C(Ar)), 142.26 (d, <sup>2</sup>J(C,P) = 7.1 Hz; C(Ph)), 143.62 (s; C(Ar)), 144.69 (d, <sup>2</sup>J(C,P) = 23.5 Hz; C(Ph)) ppm. <sup>31</sup>P{<sup>1</sup>H} NMR (242.9 MHz, CDCl<sub>3</sub>, 30 °C): δ = 125.44 (s) ppm. C<sub>54</sub>H<sub>56</sub>N<sub>4</sub>O<sub>2</sub>P<sub>2</sub> (854.39): calcd. C 75.86, H 6.60, N 6.55; found C 76.07, H 6.69, N 6.70.

(11*S*,12*S*)-Bis[(((1*R*,5*R*)-2,4-diphenyl-2,4-diaza-3-phospha-bicyclo[3.4.0]nonan-3-yloxy)methyl]-9,10-dihydro-9,10-ethanoanthracene (**L2b**): White solid, yield 0.82 g (96 %). <sup>1</sup>H NMR (600.1 MHz, CDCl<sub>3</sub>, 30 °C): δ = 1.15-1.22 (m, 2H; CH<sub>2</sub>CHN), 1.24-1.28 (m, 2H; CHCHCH<sub>2</sub>O), 1.28-1.34 (m, 2H; CH<sub>2</sub>'CH'N), 1.40-1.49 (m, 4H; CH<sub>2</sub> and CH<sub>2</sub>'), 1.85-1.92 (m, 4H; CH<sub>2</sub> and CH<sub>2</sub>'), 2.38-2.40 (br.m, 2H; CH<sub>2</sub>CHN), 2.43-2.45 (br.m, 2H; CH<sub>2</sub>'CH'N), 3.08-3.13 (m, 2H; CHCHCH<sub>2</sub>O), 3.40-3.43 (m, 2H; CHCHCH<sub>2</sub>O), 3.46-3.50 (m, 2H; CH<sub>2</sub>'CH'N), 3.72-3.76 (m, 2H; CH<sub>2</sub>CHN), 3.79 (d, <sup>3</sup>J(H,H) = 1.5 Hz, 2H; CHCHCH<sub>2</sub>O), 6.99-7.01 (m, 4H; *o*-CH'(Ph)), 7.01-7.03 (m, 2H; *p*-CH'(Ph)), 7.01-7.04 (m, 4H; CH'CH'C'(Ar) and CH'CH'C'(Ar)), 7.06-7.08 (m, 2H; CHCHC(Ar)), 7.07-7.08 (m, 2H; CHCHC(Ar)), 7.09-7.12 (m, 2H; *p*-CH(Ph)), 7.13-7.15 (m, 4H; *o*-CH(Ph)), 7.30-7.34 (m, 4H; *m*-CH'(Ph)), 7.33-7.36 (m, 4H; *m*-CH(Ph)) ppm. <sup>13</sup>C{<sup>1</sup>H} NMR (150.9 MHz, CDCl<sub>3</sub>, 30 °C): δ = 24.39 (s; CH<sub>2</sub>'), 24.42 (s; CH<sub>2</sub>), 28.86 (s; CH<sub>2</sub>'CH'N), 29.14 (d, <sup>3</sup>J(C,P) = 1.5 Hz; CH<sub>2</sub>CHN), 44.17 (d, <sup>3</sup>J(C,P) = 3.9 Hz; CHCHCH<sub>2</sub>O), 44.86 (s; CHCHCH<sub>2</sub>O), 63.58 (d, <sup>2</sup>J(C,P) = 6.9 Hz; CH<sub>2</sub>CHN), 65.14 (d, <sup>2</sup>J(C,P) = 7.0 Hz; CH<sub>2</sub>'CH'N), 66.85 (d, <sup>2</sup>J(C,P) = 9.4 Hz; CHCHCH<sub>2</sub>O), 118.75 (d, <sup>3</sup>J(C,P) = 10.0 Hz; *o*-CH'(Ph)), 121.35 (s; *p*-CH'(Ph)), 122.98 (d, <sup>5</sup>J(C,P) = 2.9 Hz; *p*-CH(Ph)), 123.29 (s; CHCHC(Ar)), 123.34 (d, <sup>3</sup>J(C,P) = 6.1 Hz; *o*-CH(Ph)), 125.40 (s; CHCHC(Ar)), 125.69 (s; CH'CH'C'(Ar)), 125.70 (s; CH'CH'C'(Ar)), 128.94 (s; *m*-CH'(Ph)), 129.23 (d, <sup>4</sup>J(C,P) = 1.5 Hz; *m*-CH(Ph)), 140.50 (s; CHCHC(Ar)), 142.48 (d, <sup>2</sup>J(C,P) = 7.0 Hz; C(Ph)), 143.40 (s; CH'CH'C'(Ar)), 144.68 (d, <sup>2</sup>J(C,P) = 23.5 Hz; C'(Ph)) ppm. <sup>31</sup>P{<sup>1</sup>H} NMR (242.9 MHz, CDCl<sub>3</sub>, 30 °C): δ = 129.80 (s) ppm. C<sub>54</sub>H<sub>56</sub>N<sub>4</sub>O<sub>2</sub>P<sub>2</sub> (854.39): calcd. C 75.86, H 6.60, N 6.55; found C 76.16, H 6.72, N 6.34.



## EXPERIMENTAL SECTION

Hz; CH<sub>2</sub>CH<sub>2</sub>N), 54.62 (d, <sup>2</sup>J(C,P) = 7.2 Hz; CH<sub>2</sub>CHN), 63.30 (d, <sup>2</sup>J(C,P) = 8.7 Hz; CH<sub>2</sub>CHN), 64.40 (d, <sup>2</sup>J(C,P) = 3.8 Hz; CHCHCH<sub>2</sub>OP), 71.77 (s; CHCHCH<sub>2</sub>OTs), 114.76 (d, <sup>3</sup>J(C,P) = 12.0 Hz; *o*-CH(Ph)), 118.96 (s; *p*-CH(Ph)), 123.40 (s; CHCHC(Ar)), 123.52 (s; CHCHC(Ar)), 125.45 (s; CHCHC(Ar)), 125.57 (s; CHCHC(Ar)), 125.63 (s; CHCHC(Ar)), 125.67 (s; CHCHC(Ar)), 126.10 (s; CHCHC(Ar)), 126.15 (s; CHCHC(Ar)), 127.91 (s; SCCH(Ts)), 129.12 (s; *m*-CH(Ph)), 129.83 (s; CH<sub>3</sub>CCH(Ts)), 132.89 (s; CH<sub>3</sub>CCH(Ts)), 139.54 (s; CHCHC(Ar)), 140.34 (s; CHCHC(Ar)), 142.44 (s; CHCHC(Ar)), 143.12 (s; CHCHC(Ar)), 144.69 (s; SCCH(Ts)), 145.49 (d, <sup>2</sup>J(C,P) = 15.6 Hz; C(Ph)) ppm. <sup>31</sup>P{<sup>1</sup>H} NMR (242.9 MHz, CDCl<sub>3</sub>, 30 °C) δ = 122.29 (s) ppm. C<sub>36</sub>H<sub>37</sub>N<sub>2</sub>O<sub>4</sub>PS (624.22): calcd. C 69.21, H 5.97, N 4.48; found C 69.33, H 6.01, N 4.42.

(11*S*,12*S*)-11-(((2*S*,5*R*)-3-Phenyl-1,3-diaza-2-phospha-bicyclo[3.3.0]octyloxy)methyl)-12-((tosyloxy)methyl)-9,10-dihydro-9,10-ethanoanthracene (**L3b**): White solid, yield 1.07 g (86 %). <sup>1</sup>H NMR (600.1 MHz, CDCl<sub>3</sub>, 30 °C): δ = 1.36-1.39 (m, 1H; CHCHCH<sub>2</sub>OP), 1.53-1.58 (m, 1H; CH<sub>2</sub>), 1.67-1.71 (m, 1H; CHCHCH<sub>2</sub>OTs), 1.71-1.77 (m, 1H; CH<sub>2</sub>CH<sub>2</sub>N), 1.78-1.84 (m, 1H; CH<sub>2</sub>CH<sub>2</sub>N), 1.94-1.99 (m, 1H; CH<sub>2</sub>), 2.48 (s, 3H; CH<sub>3</sub>CCH(Ts)), 2.93-2.97 (m, 1H; CHCHCH<sub>2</sub>OP), 3.09-3.14 (m, 1H; CH<sub>2</sub>CHN), 3.11-3.15 (m, 1H; CH<sub>2</sub>CH<sub>2</sub>N), 3.24-3.27 (dd, <sup>2</sup>J(H,H) = 10.3 Hz, <sup>3</sup>J(H,H) = 9.7 Hz, 1H; CHCHCH<sub>2</sub>OTs), 3.32-3.35 (m, 1H; CHCHCH<sub>2</sub>OP), 3.50-3.55 (m, 1H; CH<sub>2</sub>CH<sub>2</sub>N), 3.56-3.58 (m, 1H; CH<sub>2</sub>CHN), 3.80-3.85 (m, 1H; CH<sub>2</sub>CHN), 3.87-3.89 (dd, <sup>2</sup>J(H,H) = 9.5 Hz, <sup>3</sup>J(H,H) = 4.8 Hz, 1H; CHCHCH<sub>2</sub>OTs), 4.15 (d, <sup>3</sup>J(H,H) = 2.2 Hz, 1H; CHCHCH<sub>2</sub>OP), 4.22 (d, <sup>3</sup>J(H,H) = 2.1 Hz, 1H; CHCHCH<sub>2</sub>OTs), 6.76 (br.d, <sup>3</sup>J(H,H) ~ 7.3 Hz, 1H; CH(Ar)), 6.87-6.96 (m, 3H; CH(Ar)), 6.88-6.90 (m, 1H; *p*-CH(Ph)), 7.02-7.03 (m, 2H; *o*-CH(Ph)), 7.02-7.07 (m, 2H; CH(Ar)), 7.17-7.20 (m, 2H; CH(Ar)), 7.27-7.30 (m, 2H; *m*-CH(Ph)), 7.35-7.37 (m, 2H; CH<sub>3</sub>CCH(Ts)), 7.78-7.80 (m, 2H; SCCH(Ts)) ppm. <sup>13</sup>C{<sup>1</sup>H} NMR (150.9 MHz, CDCl<sub>3</sub>, 30 °C): δ = 21.62 (s; CH<sub>3</sub>CCH(Ts)), 26.16 (d, <sup>3</sup>J(C,P) = 3.9 Hz; CH<sub>2</sub>CH<sub>2</sub>N), 32.21 (s; CH<sub>2</sub>), 42.54 (s; CHCHCH<sub>2</sub>OTs), 43.73 (d, <sup>3</sup>J(C,P) = 2.1 Hz; CHCHCH<sub>2</sub>OP), 44.90 (s; CHCHCH<sub>2</sub>OTs), 45.35 (s; CHCHCH<sub>2</sub>OP), 48.65 (d, <sup>2</sup>J(C,P) = 38.3 Hz; CH<sub>2</sub>CH<sub>2</sub>N), 54.76 (d, <sup>2</sup>J(C,P) = 7.4 Hz; CH<sub>2</sub>CHN), 63.29 (d, <sup>2</sup>J(C,P) = 8.8 Hz; CH<sub>2</sub>CHN), 64.21 (d, <sup>2</sup>J(C,P) = 4.7 Hz; CHCHCH<sub>2</sub>OP), 71.94 (s; CHCHCH<sub>2</sub>OTs), 114.88 (d, <sup>3</sup>J(C,P) = 12.3 Hz; *o*-CH(Ph)), 118.95 (d, <sup>5</sup>J(C,P) = 0.8 Hz; *p*-CH(Ph)), 123.23 (s; CH(Ar)), 123.37 (s; CH(Ar)), 125.49 (s; CH(Ar)), 125.62 (s; CH(Ar)), 125.74 (s; CH(Ar)), 125.79 (s; CH(Ar)), 125.92 (s; CH(Ar)), 126.15 (s; CH(Ar)), 127.98 (s; SCCH(Ts)), 129.15 (s; *m*-CH(Ph)), 129.88 (s; CH<sub>3</sub>CCH(Ts)), 132.96 (s; CH<sub>3</sub>CCH(Ts)), 139.51 (s; C(Ar)), 140.10 (s; C(Ar)), 142.42 (s; C(Ar)), 143.28 (s; C(Ar)), 144.76 (s; SCCH(Ts)), 145.60 (d, <sup>2</sup>J(C,P) = 15.8 Hz; C(Ph)) ppm. <sup>31</sup>P{<sup>1</sup>H} NMR (242.9 MHz, CDCl<sub>3</sub>, 30 °C) δ = 121.22 (s) ppm. C<sub>36</sub>H<sub>37</sub>N<sub>2</sub>O<sub>4</sub>PS (624.22): calcd. C 69.21, H 5.97, N 4.48; found C 69.41, H 6.05, N 4.61.

(11*S*,12*S*)-11-(((2*R*,5*S*)-3-Phenyl-1,3-diaza-2-phospha-bicyclo[3.3.0]octyloxy)methyl)-12-(((*E*)-ferrocenylidene)amino)methyl)-9,10-dihydro-9,10-ethanoanthracene (**L4**): Orange solid, yield 1.06 g (80 %). <sup>1</sup>H NMR (600.1 MHz, CDCl<sub>3</sub>, 30 °C): δ = 1.47-1.51 (m, 1H; CHCHCH<sub>2</sub>N), 1.52-1.57 (m, 1H; CH<sub>2</sub>), 1.64-

## EXPERIMENTAL SECTION

1.67 (m, 1H; CHCH<sub>2</sub>OP), 1.72-1.79 (m, 1H; CH<sub>2</sub>CH<sub>2</sub>N), 1.80-1.86 (m, 1H; CH<sub>2</sub>CH<sub>2</sub>N), 1.92-1.98 (m, 1H; CH<sub>2</sub>), 2.83-2.86 (dd, <sup>2</sup>J(H,H) = 11.6 Hz, <sup>3</sup>J(H,H) = 9.1 Hz, 1H; CHCHCH<sub>2</sub>N), 2.90-2.95 (m, 1H; CHCHCH<sub>2</sub>OP), 3.08-3.11 (ddd, <sup>2</sup>J(H,H) = 9.1 Hz, <sup>3</sup>J(H,H) = 7.3 Hz, <sup>3</sup>J(H,P) = 3.7 Hz, 1H; CH<sub>2</sub>CHN), 3.18-3.21 (m, 1H; CHCHCH<sub>2</sub>N), 3.21-3.26 (m, 1H; CH<sub>2</sub>CH<sub>2</sub>N), 3.46-3.49 (m, 1H; CHCHCH<sub>2</sub>OP), 3.57-3.60 (m, 1H; CH<sub>2</sub>CHN), 3.61-3.66 (m, 1H; CH<sub>2</sub>CH<sub>2</sub>N), 3.82-3.86 (m, 1H; CH<sub>2</sub>CHN), 4.11 (d, <sup>3</sup>J(H,H) = 2.0 Hz, 1H; CHCHCH<sub>2</sub>N), 4.16 (s, 5H; C<sub>5</sub>H<sub>5</sub>(Fc)), 4.33-4.34 (m, 1H; CH(Fc)), 4.35-4.36 (m, 1H; CH(Fc)), 4.44 (d, <sup>3</sup>J(H,H) = 2.0 Hz, 1H; CHCHCH<sub>2</sub>OP), 4.57-4.58 (m, 1H; CH(Fc)), 4.58-4.59 (m, 1H; CH(Fc)), 6.84 (t, <sup>3</sup>J(H,H) = 7.3 Hz, 1H; *p*-CH(Ph)), 7.01-7.03 (m, 2H; *o*-CH(Ph)), 7.07-7.09 (m, 2H; CH(Ar)), 7.10-7.12 (m, 2H; CH(Ar)), 7.18-7.22 (m, 2H; CH(Ar)), 7.22-7.24 (m, 2H; *m*-CH(Ph)), 7.23-7.26 (m, 1H; CH(Ar)), 7.29-7.31 (m, 1H; CH(Ar)), 7.99 (s, 1H; FcCH) ppm. <sup>13</sup>C{<sup>1</sup>H} NMR (150.9 MHz, CDCl<sub>3</sub>, 30 °C): δ = 26.22 (d, <sup>3</sup>J(C,P) = 3.9 Hz; CH<sub>2</sub>CH<sub>2</sub>N), 32.10 (s; CH<sub>2</sub>), 43.76 (s; CHCHCH<sub>2</sub>N), 45.35 (d, <sup>3</sup>J(C,P) = 2.8 Hz; CHCHCH<sub>2</sub>OP), 45.51 (s; CHCHCH<sub>2</sub>OP), 46.38 (s; CHCHCH<sub>2</sub>N), 48.67 (d, <sup>2</sup>J(C,P) = 38.7 Hz; CH<sub>2</sub>CH<sub>2</sub>N), 54.72 (d, <sup>2</sup>J(C,P) = 7.2 Hz; CH<sub>2</sub>CHN), 63.28 (d, <sup>2</sup>J(C,P) = 8.8 Hz; CH<sub>2</sub>CHN), 64.42 (d, <sup>2</sup>J(C,P) = 5.1 Hz; CHCHCH<sub>2</sub>OP), 65.65 (s; CHCHCH<sub>2</sub>N), 68.25 (s; CH(Fc)), 68.53 (s; CH(Fc)), 69.01 (s; C<sub>5</sub>H<sub>5</sub>(Fc)), 70.31 (s; CH(Fc)), 80.71 (s; C(Fc)), 114.74 (d, <sup>3</sup>J(C,P) = 11.7 Hz; *o*-CH(Ph)), 118.78 (s; *p*-CH(Ph)), 123.11 (s; CH(Ar)), 123.68 (s; CH(Ar)), 125.11 (s; CH(Ar)), 125.12 (s; CH(Ar)), 125.34 (s; CH(Ar)), 125.76 (s; CH(Ar)), 125.87 (s; CH(Ar)), 125.90 (s; CH(Ar)), 129.06 (s; *m*-CH(Ph)), 140.87 (s; C(Ar)), 140.89 (s; C(Ar)), 143.71 (s; C(Ar)), 143.88 (s; C(Ar)), 145.71 (d, <sup>2</sup>J(C,P) = 15.8 Hz; C(Ph)), 161.39 (s; FcCH) ppm. <sup>31</sup>P{<sup>1</sup>H} NMR (242.9 MHz, CDCl<sub>3</sub>, 30 °C) δ = 120.86 (s) ppm. C<sub>40</sub>H<sub>40</sub>FeN<sub>3</sub>OP (665.23): calcd. C 72.18, H 6.06, N 6.31; found C 72.31, H 6.11, N 6.41.

(11*S*,12*S*)-11-(((2*R*,5*S*)-3-phenyl-1,3-diaza-2-phosphabicyclo[3.3.0]octyloxy)methyl)-12-((phenylthio)methyl)-9,10-dihydro-9,10-ethanoanthracene (**L5a**): White solid, yield 1.02 g (91 %). <sup>1</sup>H NMR (600.1 MHz, CDCl<sub>3</sub>, 30 °C): δ = 1.41-1.44 (m, 1H; CHCH<sub>2</sub>S), 1.57-1.62 (m, 1H; CH<sub>2</sub>), 1.70-1.74 (m, 1H; CHCHCH<sub>2</sub>OP), 1.75-1.81 (m, 1H; CH<sub>2</sub>CH<sub>2</sub>N), 1.83-1.89 (m, 1H; CH<sub>2</sub>CH<sub>2</sub>N), 1.96-2.02 (m, 1H; CH<sub>2</sub>), 2.48-2.52 (dd, <sup>2</sup>J(H,H) = 13.0 Hz, <sup>3</sup>J(H,H) = 9.0 Hz, 1H; CHCHCH<sub>2</sub>S), 2.61-2.64 (dd, <sup>2</sup>J(H,H) = 13.0 Hz, <sup>3</sup>J(H,H) = 6.2 Hz, 1H; CHCHCH<sub>2</sub>S), 2.94-2.99 (m, 1H; CHCHCH<sub>2</sub>OP), 3.14-3.17 (ddd, <sup>2</sup>J(H,H) = 9.0 Hz, <sup>3</sup>J(H,H) = 7.1 Hz, <sup>3</sup>J(H,P) = 3.9 Hz, 1H; CH<sub>2</sub>CHN), 3.21-3.26 (m, 1H; CH<sub>2</sub>CH<sub>2</sub>N), 3.34-3.37 (m, 1H; CHCHCH<sub>2</sub>OP), 3.61-3.64 (m, 1H; CH<sub>2</sub>CHN), 3.63-3.68 (m, 1H; CH<sub>2</sub>CH<sub>2</sub>N), 3.86-3.90 (m, 1H; CH<sub>2</sub>CHN), 4.34 (d, <sup>3</sup>J(H,H) = 2.0 Hz, 1H; CHCHCH<sub>2</sub>S), 4.41 (d, <sup>3</sup>J(H,H) = 1.9 Hz, 1H; CHCHCH<sub>2</sub>OP), 6.86-6.89 (m, 1H; CH(Ar)), 7.03-7.05 (m, 2H; CH(Ar)), 7.10-7.18 (m, 5H; CH(Ar)), 7.20-7.31 (m, 10H; CH(Ar)) ppm. <sup>13</sup>C{<sup>1</sup>H} NMR (150.9 MHz, CDCl<sub>3</sub>, 30 °C): δ = 26.21 (d, <sup>3</sup>J(C,P) = 3.8 Hz; CH<sub>2</sub>CH<sub>2</sub>N), 32.14 (s; CH<sub>2</sub>), 38.66 (s; CHCHCH<sub>2</sub>S), 42.36 (s; CHCHCH<sub>2</sub>S), 45.76 (s; CHCHCH<sub>2</sub>OP), 47.51 (s; CHCHCH<sub>2</sub>S), 47.52 (d, <sup>3</sup>J(C,P) = 3.7 Hz; CHCHCH<sub>2</sub>OP), 48.64 (d, <sup>2</sup>J(C,P) = 38.5 Hz; CH<sub>2</sub>CH<sub>2</sub>N), 54.70 (d, <sup>2</sup>J(C,P) = 7.2 Hz; CH<sub>2</sub>CHN), 63.23 (d, <sup>2</sup>J(C,P) = 8.8 Hz; CH<sub>2</sub>CHN), 64.53 (d, <sup>2</sup>J(C,P) = 4.6 Hz; CHCHCH<sub>2</sub>OP), 114.75 (d, <sup>3</sup>J(C,P) = 11.8 Hz; *o*-CH(Ph)), 118.87 (s; *p*-CH(Ph)), 123.32 (s;



## EXPERIMENTAL SECTION

CH(Ar)), 123.59 (s; CH(Ar)), 125.35 (s; CH(Ar)), 125.42 (s; CH(Ar)), 125.57 (s; CH(Ar)), 125.73 (s; CH(Ar)), 125.78 (s; *p*-CH(Ph)), 125.83 (s; CH(Ar)), 126.09 (s; CH(Ar)), 128.82 (s; *m*-CH(Ph)), 129.08 (s; *m*-CH(Ph) and *o*-CH(Ph)), 136.28 (s; C(Ph)), 140.42 (s; C(Ar)), 140.64 (s; C(Ar)), 143.28 (s; C(Ar)), 143.37 (s; C(Ar)), 145.62 (d,  $^2J(C,P) = 15.5$  Hz; C(Ph)) ppm.  $^{31}P\{^1H\}$  NMR (242.9 MHz,  $CDCl_3$ , 30 °C)  $\delta = 121.27$  (s) ppm.  $C_{35}H_{35}N_2OPS$  (562.22): calcd. C 74.71, H 6.27, N 4.98; found C 74.82, H 6.24, N 4.93.

(11*S*,12*S*)-11-(((2*R*,5*S*)-3-phenyl-1,3-diaza-2-phosphabicyclo[3.3.0]octyloxy)methyl)-12-((phenylthio)methyl)-9,10-dihydro-9,10-ethanoanthracene (**L5b**): White solid, yield 1.09 g (97 %).  $^1H$  NMR (600.1 MHz,  $CDCl_3$ , 30 °C):  $\delta = 1.50$ -1.54 (m, 2H;  $CHCH_2CH_2S$  and  $CH_2$ ), 1.67-1.73 (m, 1H;  $CH_2CH_2N$ ), 1.69-1.73 (m, 1H;  $CHCH_2CH_2OP$ ), 1.74-1.80 (m, 1H;  $CH_2CH_2N$ ), 1.89-1.95 (m, 1H;  $CH_2$ ), 2.45-2.49 (dd,  $^2J(H,H) = 13.0$  Hz,  $^3J(H,H) = 9.5$  Hz, 1H;  $CHCH_2CH_2S$ ), 2.78-2.81 (dd,  $^2J(H,H) = 13.0$  Hz,  $^3J(H,H) = 5.7$  Hz, 1H;  $CHCH_2CH_2S$ ), 2.85-2.89 (m, 1H;  $CHCH_2CH_2OP$ ), 3.07-3.11 (m; 1H;  $CH_2CHN$ ), 3.07-3.12 (m, 1H;  $CH_2CH_2N$ ), 3.41-3.45 (m, 1H;  $CHCH_2CH_2OP$ ), 3.49-3.53 (m, 1H;  $CH_2CH_2N$ ), 3.53-3.55 (m, 1H;  $CH_2CHN$ ), 3.78-3.82 (m, 1H;  $CH_2CHN$ ), 4.22 (d,  $^3J(H,H) = 1.8$  Hz, 1H;  $CHCH_2CH_2OP$ ), 4.34 (d,  $^3J(H,H) = 1.8$  Hz, 1H;  $CHCH_2CH_2S$ ), 6.76 (d,  $^3J(H,H) = 7.3$  Hz, 1H; CH(Ar)), 6.85 (t,  $^3J(H,H) = 7.4$  Hz, 1H; CH(Ar)), 6.88 (t,  $^3J(H,H) = 7.3$  Hz, 1H; CH(Ar)), 6.99 (t,  $^3J(H,H) = 7.4$  Hz, 1H; CH(Ar)), 7.04-7.05 (m, 2H; CH(Ar)), 7.07-7.11 (m, 2H; CH(Ar)), 7.13-7.19 (m, 2H; CH(Ar)), 7.17-7.18 (m, 1H; CH(Ar)), 7.20-7.22 (m, 1H; CH(Ar)), 7.23-7.26 (m, 2H; CH(Ar)), 7.27-7.29 (m, 2H; CH(Ar)), 7.31-7.33 (m, 2H; CH(Ar)) ppm.  $^{13}C\{^1H\}$  NMR (150.9 MHz,  $CDCl_3$ , 30 °C):  $\delta = 26.18$  (d,  $^3J(C,P) = 3.9$  Hz;  $CH_2CH_2N$ ), 32.19 (s;  $CH_2$ ), 38.63 (s;  $CHCH_2CH_2S$ ), 42.65 (s;  $CHCH_2CH_2S$ ), 45.86 (s;  $CHCH_2CH_2OP$ ), 47.34 (s;  $CHCH_2CH_2S$ ), 47.77 (d,  $^3J(C,P) = 2.1$  Hz;  $CHCH_2CH_2OP$ ), 48.61 (d,  $^2J(C,P) = 38.2$  Hz;  $CH_2CH_2N$ ), 54.76 (d,  $^2J(C,P) = 7.4$  Hz;  $CH_2CHN$ ), 63.27 (d,  $^2J(C,P) = 8.8$  Hz;  $CH_2CHN$ ), 64.49 (d,  $^2J(C,P) = 4.7$  Hz;  $CHCH_2CH_2OP$ ), 114.88 (d,  $^3J(C,P) = 12.3$  Hz; *o*-CH(Ph)), 118.85 (s; *p*-CH(Ph)), 123.07 (s; CH(Ar)), 123.49 (s; CH(Ar)), 125.48 (s; CH(Ar)), 125.57 (s; CH(Ar)), 125.64 (s; CH(Ar)), 125.70 (s; CH(Ar)), 125.74 (s; CH(Ar)), 126.06 (s; CH(Ar)), 128.86 (s; CH(Ar)), 128.91 (s; CH(Ar)), 129.10 (br.s; *m*-CH(Ph)), 136.52 (s; C(Ph)), 140.35 (s; C(Ar)), 140.39 (s; C(Ar)), 143.19 (s; C(Ar)), 143.51 (s; C(Ar)), 145.68 (d,  $^2J(C,P) = 15.8$  Hz; C(Ph)) ppm.  $^{31}P\{^1H\}$  NMR (242.9 MHz,  $CDCl_3$ , 30 °C)  $\delta = 120.64$  (s) ppm.  $C_{35}H_{35}N_2OPS$  (562.22): calcd. C 74.71, H 6.27, N 4.98; found C 74.94, H 6.34, N 5.10.

## EXPERIMENTAL SECTION

**Preparation of [Pd(allyl)(L1a)]BF<sub>4</sub> complex.** A solution of **L1a** (135 mg, 0.2 mmol) in THF (3 mL) was added dropwise over 30 min to a stirred solution of [Pd(allyl)Cl]<sub>2</sub> (37 mg, 0.1 mmol) in THF (2 mL) at 20 °C. The reaction mixture was stirred for a further 1 h at 20 °C. AgBF<sub>4</sub> (39 mg, 0.2 mmol) was added to the resulting solution, and the reaction mixture was stirred for 1.5 h at 20 °C. The precipitate of AgCl formed was separated by centrifugation, solvent was removed in vacuum (40 Torr) and the crude product was dried in air and in vacuum (10<sup>-3</sup> Torr). The product was dissolved in CH<sub>2</sub>Cl<sub>2</sub> (0.3 mL) and reprecipitated from petroleum ether (10 mL). The precipitate of the product was separated by centrifugation and dried in air and in vacuum (10<sup>-3</sup> Torr).

[Pd(allyl)(L1a)]BF<sub>4</sub>: White solid, yield 0.17 g (91 %). <sup>1</sup>H NMR (600.1 MHz, CDCl<sub>3</sub>, 25 °C): δ = 1.83-1.87 (m, 2H; CH<sub>2</sub>), 1.90-1.94 (m, 2H; CH<sub>2</sub>CH<sub>2</sub>N), 2.01-2.06 (m, 2H; CH<sub>2</sub>CH<sub>2</sub>N), 2.29-2.32 (m, 2H; CHCHCH<sub>2</sub>O), 2.30-2.35 (m, 2H; CH<sub>2</sub>), 2.90-2.97 (m, 2H; CHCHCH<sub>2</sub>O), 3.18-3.25 (br.m, 2H; CH<sub>2</sub>CH<sub>2</sub>N), 3.41 (t, <sup>2</sup>J(H,H) = <sup>3</sup>J(H,H) = 9.1 Hz, 2H; CH<sub>2</sub>CHN), 3.45-3.51 (br.m, 2H; CH<sub>2</sub>CH<sub>2</sub>N), 3.92-3.96 (m, 2H; CH<sub>2</sub>CHN), 4.19 (s, 2H; CHCHCH<sub>2</sub>O), 4.43-4.48 (m, 2H; CH<sub>2</sub>CHN), 4.49-4.54 (m, 2H; CHCHCH<sub>2</sub>O), 5.00-5.07 (p, <sup>3</sup>J(H,H) = 10.5 Hz, CH(allyl)), 6.94 (t, <sup>3</sup>J(H,H) = 7.3 Hz, 2H; *p*-CH(Ph)), 6.96-6.97 (m, 4H; *o*-CH(Ph)), 7.10 (t, <sup>3</sup>J(H,H) = 7.4 Hz, 2H; CHCHC(Ar)), 7.16 (t, <sup>3</sup>J(H,H) = 7.4 Hz, 2H; CH'CH'C'(Ar)), 7.22 (t, <sup>3</sup>J(H,H) = 7.9 Hz, 4H; *m*-CH(Ph)), 7.24 (d, <sup>3</sup>J(H,H) = 7.4 Hz, 2H; CH'CH'C'(Ar)), 7.38 (d, <sup>3</sup>J(H,H) = 7.4 Hz, 2H; CHCHC(Ar)) ppm. <sup>13</sup>C{<sup>1</sup>H} NMR (150.9 MHz, CDCl<sub>3</sub>, 25 °C): δ = 27.18 (vt, J(C,P) = 2.3 Hz; CH<sub>2</sub>CH<sub>2</sub>N), 31.33 (s; CH<sub>2</sub>), 44.84 (s; CHCHCH<sub>2</sub>O), 45.81 (s; CHCHCH<sub>2</sub>O), 49.11 (vt, J(C,P) = 10.5 Hz; CH<sub>2</sub>CH<sub>2</sub>N), 53.96 (s; CH<sub>2</sub>CHN), 62.59 (s; CH<sub>2</sub>CHN), 66.92-67.69 (br.m, CH<sub>2</sub>(allyl)), 70.88 (vt, J(C,P) = 6.6 Hz; CHCHCH<sub>2</sub>O), 115.99 (br.s; *o*-CH(Ph)), 121.72 (s; *p*-CH(Ph)), 123.42 (t, <sup>2</sup>J(C,P) = 8.6 Hz; CH(allyl)), 123.61 (s; CHCHC(Ar)), 124.96 (s; CH'CH'C'(Ar)), 125.97 (s; CHCHC(Ar)), 126.46 (s; CH'CH'C'(Ar)), 129.30 (s; *m*-CH(Ph)), 140.13 (s; CHCHC(Ar)), 142.57 (s; CH'CH'C'(Ar)), 142.86-142.93 (m; C(Ph)) ppm. <sup>31</sup>P{<sup>1</sup>H} NMR (242.9 MHz, CDCl<sub>3</sub>, 25 °C): δ = 117.80 (s) ppm. C<sub>43</sub>H<sub>49</sub>BF<sub>4</sub>N<sub>4</sub>O<sub>2</sub>P<sub>2</sub>Pd (908.24): calcd. C 56.81, H 5.43, N 6.16; found C 57.06, H 5.50, N 6.28.

EXPERIMENTAL SECTION

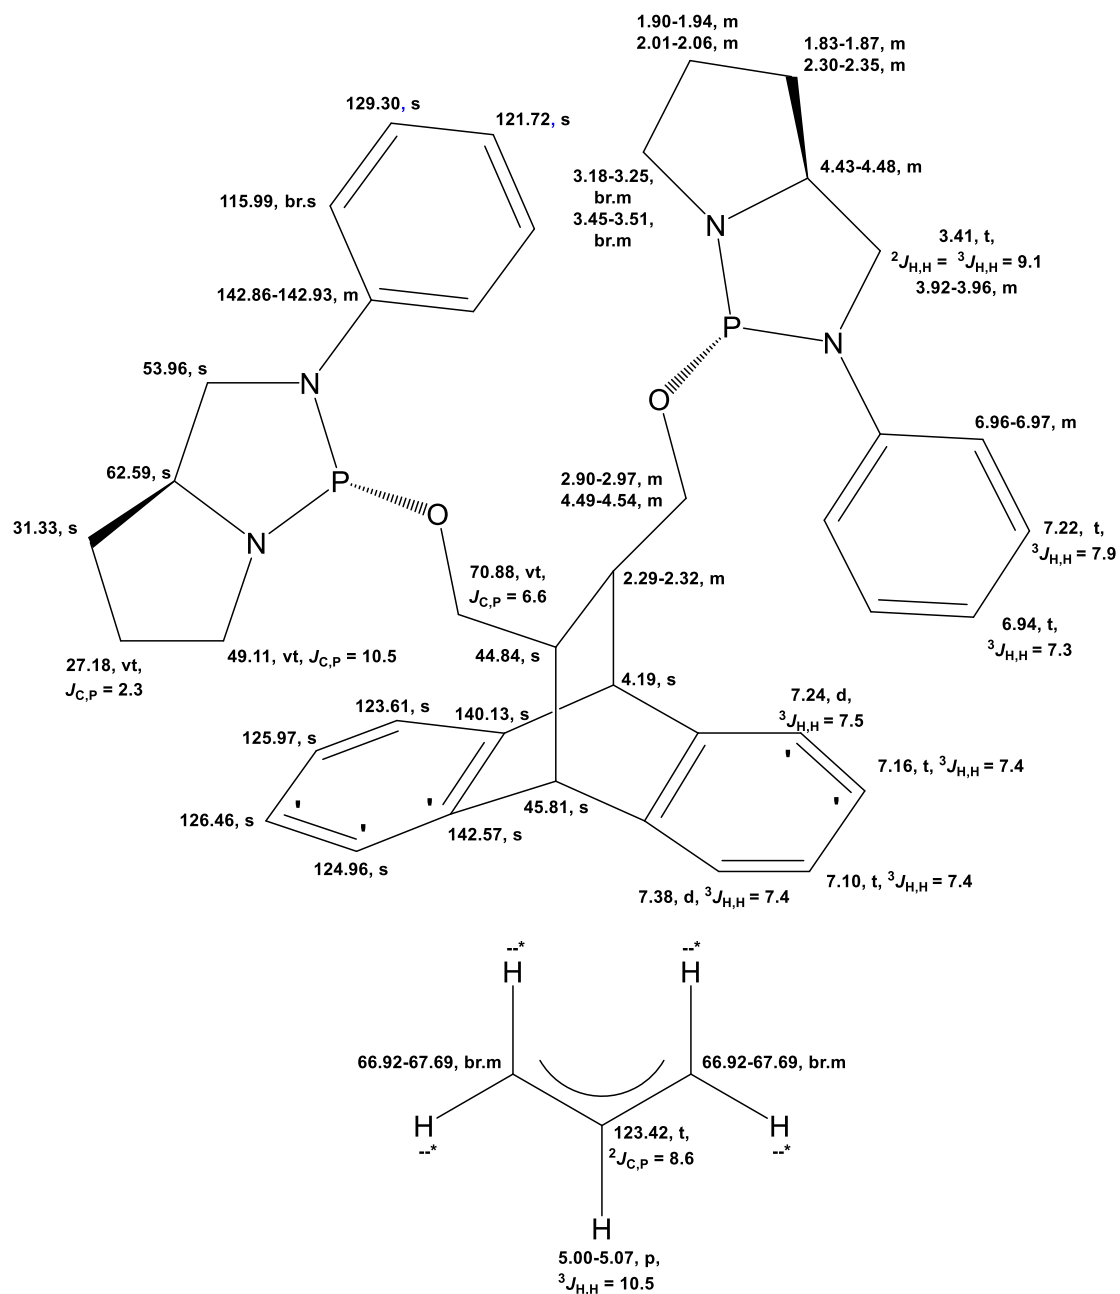

\* too broad to detect a chemical shift

${}^{13}\text{C}\{^1\text{H}\}$  and  ${}^1\text{H}$  NMR Signals Assignment for  $[\text{Pd}(\text{allyl})(\text{L1a})]\text{BF}_4$ .

## EXPERIMENTAL SECTION

**Preparation of [Pd(allyl)(L5a)]<sub>2</sub>(BF<sub>4</sub>)<sub>2</sub>.** A solution of **L5a** (112.5 mg, 0.2 mmol) in THF (2 mL) was added dropwise over 30 min to a stirred solution of [Pd(allyl)Cl]<sub>2</sub> (37 mg, 0.1 mmol) in THF (1 mL) at 20 °C. The reaction mixture was stirred for a further 1 h at 20 °C. AgBF<sub>4</sub> (39 mg, 0.2 mmol) was added to the resulting solution, and the reaction mixture was stirred for 1.5 h at 20 °C. The precipitate of [Pd(allyl)(L5a)]<sub>2</sub>(BF<sub>4</sub>)<sub>2</sub> and AgCl was separated by centrifugation and washed with THF (2 x 10 mL). The crude product was dissolved in CH<sub>2</sub>Cl<sub>2</sub> than the precipitate of AgCl was separated by centrifugation. Solvent was removed in vacuum (40 Torr) and the product was dried in air and in vacuum (10<sup>-3</sup> Torr). The product was washed with boiling THF (2 x 15 mL) then dried in air and in vacuum (10<sup>-3</sup> Torr).

Pd(allyl)(L5a)]<sub>2</sub>(BF<sub>4</sub>)<sub>2</sub>: White solid, yield 45 mg (28 %). <sup>1</sup>H NMR (600.1 MHz, CD<sub>2</sub>Cl<sub>2</sub>, 30 °C): δ = 1.45-1.80 (m, 7H), 1.83-2.27 (m, 7H), 2.37-3.66 (m, 17H), 3.71-4.73 (m, 11H), 5.18-5.97 (m, 2H; CH(allyl)), 6.35-7.93 (m, 36H; CH(Ar)), ppm. <sup>13</sup>C{<sup>1</sup>H} NMR (150.9 MHz, CD<sub>2</sub>Cl<sub>2</sub>, 30 °C): δ = 27.12-27.43 (m; CH<sub>2</sub>CH<sub>2</sub>N), 32.55 (s; CH<sub>2</sub>), 32.79 (s; CH<sub>2</sub>), 41.06 (s; CHCH<sub>2</sub>S), 41.70 (s; CHCH<sub>2</sub>S), 41.96 (s; CHCH<sub>2</sub>S), 42.59 (s; CHCH<sub>2</sub>S), 45.60 (br.s; CHCH<sub>2</sub>S), 46.53 (s; CH), 46.97 (s; CH), 47.09 (s; CH), 47.20 (s; CH), 47.36 (s; CH), 47.44 (s; CH), 47.47 (s; CH), 47.51 (br.s; CHCH<sub>2</sub>S), 47.85 (s; CH), 48.09 (s; CH), 48.29 (br.s; CHCH<sub>2</sub>S), 49.26-49.96 (m; CH<sub>2</sub>CH<sub>2</sub>N), 54.31 (s; CH<sub>2</sub>CHN), 54.45 (s; CH<sub>2</sub>CHN), 54.61 (s; CH<sub>2</sub>CHN), 54.75 (s; CH<sub>2</sub>CHN), 63.13 (br.s; CH<sub>2</sub>(allyl)<sup>c</sup>), 63.25 (br.s; CH<sub>2</sub>(allyl)<sup>c</sup>), 63.29 (s; CH<sub>2</sub>CHN), 63.35 (s; CH<sub>2</sub>CHN), 64.71 (br.s; CH<sub>2</sub>(allyl)<sup>c</sup>), 64.97 (br.s; CH<sub>2</sub>(allyl)<sup>c</sup>), 67.94 (d, <sup>2</sup>J(C,P) = 12.6 Hz; CH<sub>2</sub>OP), 68.19 (d, <sup>2</sup>J(C,P) = 12.8 Hz; CH<sub>2</sub>OP), 68.64 (d, <sup>2</sup>J(C,P) = 14.3 Hz; CH<sub>2</sub>OP), 85.06 (d, <sup>2</sup>J(C,P) = 39.0 Hz; CH<sub>2</sub>(allyl)<sup>t</sup>), 85.42 (d, <sup>2</sup>J(C,P) = 39.8 Hz; CH<sub>2</sub>(allyl)<sup>t</sup>), 85.51 (d, <sup>2</sup>J(C,P) = 36.1 Hz; CH<sub>2</sub>(allyl)<sup>t</sup>), 85.75 (d, <sup>2</sup>J(C,P) = 36.3 Hz; CH<sub>2</sub>(allyl)<sup>t</sup>), 115.11-115.19 (m; CH(Ar)), 115.39-115.47 (m; CH(Ar)), 121.70 (s; CH(Ar)), 121.85 (s; CH(Ar)), 121.95 (s; CH(Ar)), 122.08 (s; CH(Ar)), 123.85 (d, <sup>2</sup>J(C,P) = 8.0 Hz; CH(allyl)), 123.96 (d, <sup>2</sup>J(C,P) = 9.2 Hz; CH(allyl)), 124.22 (s; CH(Ar)), 124.33 (s; CH(Ar)), 124.38 (s; CH(Ar)), 124.49 (s; CH(Ar)), 124.83 (s; CH(Ar)), 124.87 (s; CH(Ar)), 124.93-125.00 (m; CH(allyl)), 125.28 (s; CH(Ar)), 125.55 (s; CH(Ar)), 126.46 (s; CH(Ar)), 126.56 (s; CH(Ar)), 126.69 (s; CH(Ar)), 126.78 (s; CH(Ar)), 126.90 (s; CH(Ar)), 127.11 (s; CH(Ar)), 127.33 (s; CH(Ar)), 127.42 (s; CH(Ar)), 129.80 (s; CH(Ar)), 129.93 (s; CH(Ar)), 129.99 (s; CH(Ar)), 130.11 (s; CH(Ar)), 130.47 (s; CH(Ar)), 130.59 (s; CH(Ar)), 130.78 (s; CH(Ar)), 130.82 (s; CH(Ar)), 130.88 (s; CH(Ar)), 130.95 (s; CH(Ar)), 131.06 (s; CH(Ar)), 131.09 (s; CH(Ar)), 131.56 (s; CH(Ar)), 140.11-143.10 (m; C(Ar)) ppm. <sup>31</sup>P{<sup>1</sup>H} NMR (242.9 MHz, CD<sub>2</sub>Cl<sub>2</sub>, 30 °C) δ = 117.29 (s (9%)), 117.65 (s (23%)), 117.71 (s (23%)), 118.10 (s (44%)) ppm. C<sub>76</sub>H<sub>80</sub>B<sub>2</sub>F<sub>8</sub>N<sub>4</sub>O<sub>2</sub>P<sub>2</sub>Pd<sub>2</sub>S<sub>2</sub> (1592.33): calcd. C 57.27, H 5.06, N 3.51; found C 57.40, H 5.02, N 3.57.

**General Procedure for the Preparation of Cationic Palladium Complexes of the General Formula [Pd(allyl)(L)<sub>2</sub>]BF<sub>4</sub>:** A solution of the relevant ligand **L3a**, **L4**, **L5b** (0.4 mmol) in THF (3 mL) was added dropwise over 30 min to a stirred solution of [Pd(allyl)Cl]<sub>2</sub> (37 mg, 0.1 mmol) in THF (2 mL) at 20 °C. The

## EXPERIMENTAL SECTION

reaction mixture was stirred for a further 1 h at 20 °C. AgBF<sub>4</sub> (39 mg, 0.2 mmol) was added to the resulting solution, and the reaction mixture was stirred for 1.5 h at 20 °C. The precipitate of AgCl formed was separated by centrifugation, solvent was removed in vacuum (40 Torr) and the crude product was dried in air and in vacuum (10<sup>-3</sup> Torr). The product was dissolved in CH<sub>2</sub>Cl<sub>2</sub> (0.3 mL) and reprecipitated from hexane (10 mL). The precipitate of the product was separated by centrifugation and dried in air and in vacuum (10<sup>-3</sup> Torr).

Pd(allyl)(L3a)<sub>2</sub>]BF<sub>4</sub>: White solid, yield 0.21 g (71 %). <sup>1</sup>H NMR (600.1 MHz, CDCl<sub>3</sub>, 30 °C): δ = 1.42-1.55 (br.m, 2H; CH<sub>2</sub>), 1.47-1.51 (m, 2H; CHCH<sub>2</sub>OP), 1.58-1.64 (m, 2H; CHCH<sub>2</sub>OTs), 1.99-2.13 (m, 2H; CH<sub>2</sub>), 2.00-2.12 (m, 4H; CH<sub>2</sub>CH<sub>2</sub>N), 2.38-2.61 (br.m, 2H; CH<sub>2</sub>CHN), 2.45 and 2.46 (s, 3H and s, 3H; CH<sub>3</sub>CCH(Ts)), 3.08-3.13 (m, 1H; CH<sub>2</sub>'(allyl<sub>anti</sub>)), 3.16-3.23 (br.m, 1H; CH<sub>2</sub>(allyl<sub>anti</sub>)), 3.16-3.29 (br.m, 2H; CHCHCH<sub>2</sub>OP), 3.27 and 3.30 (t, <sup>2</sup>J(H,H) = <sup>3</sup>J(H,H) = 9.4 Hz, 1H and t, <sup>2</sup>J(H,H) = <sup>3</sup>J(H,H) = 9.2 Hz, 1H; CHCHCH<sub>2</sub>OTs), 3.33-3.38 (m, 2H; CHCHCH<sub>2</sub>OP), 3.39-3.45 (m, 2H; CH<sub>2</sub>CH<sub>2</sub>N), 3.46-3.53 (m, 2H; CH<sub>2</sub>CHN), 3.54-3.56 and 3.59-3.61 (dd, <sup>2</sup>J(H,H) = 9.6 Hz, <sup>3</sup>J(H,H) = 6.0 Hz, 1H and dd, <sup>2</sup>J(H,H) = 9.6 Hz, <sup>3</sup>J(H,H) = 5.7 Hz, 1H; CHCHCH<sub>2</sub>OTs), 3.64-3.67 (m, 2H; CH<sub>2</sub>CH<sub>2</sub>N), 3.87-3.94 and 3.94-3.99 (m, 1H and m, 1H; CH<sub>2</sub>CHN), 4.11 and 4.12 (d, <sup>3</sup>J(H,H) = 1.8 Hz, 1H and d, <sup>3</sup>J(H,H) = 1.8 Hz, 1H; CHCHCH<sub>2</sub>OTs), 4.19 (d, <sup>3</sup>J(H,H) = 1.7 Hz, 2H; CHCHCH<sub>2</sub>OP), 4.54 (br.s, 2H; CH<sub>2</sub>(allyl<sub>syn</sub>)), CH<sub>2</sub>'(allyl<sub>syn</sub>)), 5.53-5.64 (br.m, 1H; CH(allyl)), 6.74 and 6.76 (d, <sup>3</sup>J(H,H) = 8.0 Hz, 2H and d, <sup>3</sup>J(H,H) = 8.1 Hz, 2H; *o*-CH(Ph)), 6.85 and 6.88 (d, <sup>3</sup>J(H,H) = 7.2 Hz, 1H and d, <sup>3</sup>J(H,H) = 7.3 Hz, 1H; CH(Ar)), 6.92-6.95 (m, 2H; CH(Ar)), 6.93-6.96 (m, 2H; *p*-CH(Ph)), 7.02-7.08 (m, 6H; CH(Ar)), 7.10-7.19 (m, 6H; CH(Ar)), 7.23-7.28 (m, 4H; *m*-CH(Ph)), 7.31 and 7.32 (d, <sup>3</sup>J(H,H) = 7.9 Hz, 2H and d, <sup>3</sup>J(H,H) = 7.9 Hz, 2H; CH<sub>3</sub>CCH(Ts)), 7.64-7.67 (m, 4H; SCCH(Ts)) ppm. <sup>13</sup>C{<sup>1</sup>H} NMR (150.9 MHz, CDCl<sub>3</sub>, 30 °C): δ = 21.57 (s; CH<sub>3</sub>CCH(Ts)), 27.25-27.29 and 27.45-27.39 (m and m; CH<sub>2</sub>CH<sub>2</sub>N), 31.09 and 31.20 (s and s; CH<sub>2</sub>), 42.23 and 42.26 (s and s; CHCHCH<sub>2</sub>OTs), 43.04 (br.s; CHCHCH<sub>2</sub>OP), 44.78 and 44.83 (s and s; CHCHCH<sub>2</sub>OTs), 45.40 (s; CHCHCH<sub>2</sub>OP), 48.19-48.43 and 48.43-48.64 (br.m and br.m; CH<sub>2</sub>CH<sub>2</sub>N), 53.54 and 53.68 (s and s; CH<sub>2</sub>CHN), 62.44 and 62.68 (s and s; CH<sub>2</sub>CHN), 66.90-67.04 (m; CHCHCH<sub>2</sub>OP), 71.82 and 72.03 (s and s; CHCHCH<sub>2</sub>OTs), 72.34 (vt, J(C,P) = 20.6 Hz; CH<sub>2</sub>(allyl)), 72.70 (vt, J(C,P) = 20.9 Hz; CH<sub>2</sub>'(allyl)), 114.94 (s; *o*-CH(Ph)), 121.00 and 121.03 (s and s; *p*-CH(Ph)), 123.49 and 123.53 (s and s; CHCHC(Ar)), 123.63 (s; CHCHC(Ar)), 123.78 (t, <sup>2</sup>J(C,P) = 8.3 Hz; CH(allyl)), 125.19 (s; CHCHC(Ar)), 125.21 and 125.27 (s and s; CHCHC(Ar)), 125.79 and 125.80 (s and s; CHCHC(Ar)), 125.87 and 125.90 (s and s; CHCHC(Ar)), 126.39 and 126.44 (s and s; CHCHC(Ar)), 126.47 and 126.48 (s and s; CHCHC(Ar)), 127.68 and 127.71 (s and s; SCCH(Ts)), 129.58 and 129.63 (s and s; *m*-CH(Ph)), 129.96 (s; CH<sub>3</sub>CCH(Ts)), 132.51 (s; CH<sub>3</sub>CCH(Ts)), 139.04 (s; CHCHC(Ar)), 139.66 and 139.79 (s and s; CHCHC(Ar)), 142.21 and 142.24 (s and s; CHCHC(Ar)), 142.35 and 142.37 (s and s; CHCHC(Ar)), 142.21-142.37 (m; C(Ph)), 145.10 (s; SCCH(Ts))

## EXPERIMENTAL SECTION

ppm.  $^{31}\text{P}\{^1\text{H}\}$  NMR (242.9 MHz,  $\text{CDCl}_3$ , 30 °C)  $\delta$  = 116.23 (s) ppm.  $\text{C}_{75}\text{H}_{79}\text{BF}_4\text{N}_4\text{O}_8\text{P}_2\text{PdS}_2$  (1482.39): calcd. C 60.71, H 5.37, N 3.78; found C 61.00, H 5.47, N 3.62.

$\text{Pd}(\text{allyl})(\text{L4})_2\text{BF}_4$ : Orange solid, yield 0.16 g (50 %).  $^1\text{H}$  NMR (600.1 MHz,  $\text{CDCl}_3$ , 30 °C):  $\delta$  = 1.42-2.18 (br.m, 12H), 2.56-3.28 (br.m, 10H), 3.43-3.93 (br.m, 10H), 4.05-4.75 (br.m, 24H), 5.52-5.66 (br.m, 1H; CH(allyl)), 6.76-7.31 (br.m, 26H; CH(Ar)), 8.01 (br.s, 2H;  $\text{CH}_2\text{N}=\text{CH}$ ) ppm.  $^{13}\text{C}\{^1\text{H}\}$  NMR (150.9 MHz,  $\text{CD}_2\text{Cl}_2$ , 30 °C):  $\delta$  = 27.86 and 28.00 (s and s;  $\text{CH}_2\text{CH}_2\text{N}$ ), 31.73 (s;  $\text{CH}_2$ ), 44.40 (br.s; CH), 45.75 (br.s; CH), 46.55 (s; CH), 47.39 (s; CH), 49.34-49.80 (br.m;  $\text{CH}_2\text{CH}_2\text{N}$ ), 54.28 (br.s;  $\text{CH}_2\text{CHN}$ ), 63.08 and 63.29 (s and s;  $\text{CH}_2\text{CHN}$ ), 65.47-66.21 (br.m;  $\text{CH}_2\text{OP}$ ,  $\text{CH}_2\text{N}=\text{CH}$ ), 68.22 (br.s; CH(Fc)), 69.01 (br.s; CH(Fc)), 69.85 (br.s;  $\text{C}_5\text{H}_5(\text{Fc})$ ), 71.26-72.42 (br.m; CH(Fc),  $\text{CH}_2(\text{allyl})$ ), 80.52 (br.s; C(Fc)), 115.70 (s; *o*-CH(Ph)), 121.83 (s; *p*-CH(Ph)), 123.83-123.97 (m; CH(allyl), 123.89 (s; CH(Ar)), 124.17 (s; CH(Ar)), 125.79 (s; CH(Ar)), 125.95 (s; CH(Ar)), 126.09 (s; CH(Ar)), 126.46 (s; CH(Ar)), 126.74 (s; CH(Ar)), 126.99 (s; CH(Ar)), 130.30 (s; *m*-CH(Ph)), 140.74 and 140.78 (s and s; C(Ar)), 141.24 (s; C(Ar)), 143.18 (m; C(Ph)), 143.53 (s; C(Ar)), 144.45 (s; C(Ar)), 162.81 (br.s;  $\text{CH}_2\text{N}=\text{CH}$ ) ppm.  $^{31}\text{P}\{^1\text{H}\}$  NMR (242.9 MHz,  $\text{CD}_2\text{Cl}_2$ , 30 °C)  $\delta$  = 115.90 (br.s) ppm.  $\text{C}_{83}\text{H}_{85}\text{BF}_4\text{Fe}_2\text{N}_6\text{O}_2\text{P}_2\text{Pd}$  (1564.40): calcd. C 63.68, H 5.47, N 5.37; found C 64.02, H 5.58, N 5.58.

$\text{Pd}(\text{allyl})(\text{L5b})_2\text{BF}_4$ : White solid, yield 0.22 g (81 %).  $^1\text{H}$  NMR (600.1 MHz,  $\text{CD}_2\text{Cl}_2$ , 30 °C):  $\delta$  = 1.40-1.45 (m, 2H;  $\text{CHCHCH}_2\text{S}$ ), 1.67-1.74 (m, 2H;  $\text{CH}_2$ ), 1.94-2.00 (m, 2H;  $\text{CHCHCH}_2\text{OP}$ ), 2.01-2.08 (m, 2H;  $\text{CH}_2\text{CH}_2\text{N}$ ), 2.09-2.15 (m, 2H;  $\text{CH}_2\text{CH}_2\text{N}$ ), 2.09-2.17 (m, 2H;  $\text{CH}_2$ ), 2.35 and 2.37 (br.t,  $^2J(\text{H,H}) \sim ^3J(\text{H,H}) = 8.5$  Hz, 1H and br.t,  $^2J(\text{H,H}) \sim ^3J(\text{H,H}) = 8.5$  Hz, 1H;  $\text{CHCHCH}_2\text{S}$ ), 2.73-2.77 and 2.78-2.81 (dd,  $^2J(\text{H,H}) = 12.9$  Hz,  $^3J(\text{H,H}) = 7.1$  Hz, 1H and dd,  $^2J(\text{H,H}) = 12.9$  Hz,  $^3J(\text{H,H}) = 7.0$  Hz, 1H;  $\text{CHCHCH}_2\text{S}$ ), 2.83-2.87 (br.m, 1H;  $\text{CH}_2(\text{allyl}_{anti})$ ), 2.93-3.01 (m, 2H;  $\text{CHCHCH}_2\text{OP}$ ), 3.00-3.05 (m, 1H;  $\text{CH}_2'(\text{allyl}_{anti})$ ), 3.06-3.15 (br.m; 2H;  $\text{CH}_2\text{CHN}$ ), 3.42-3.47 and 3.48-3.53 (m, 1H and m, 1H;  $\text{CH}_2\text{CH}_2\text{N}$ ), 3.61-3.66 and 3.72-3.78 (m, 1H and br.m, 1H;  $\text{CH}_2\text{CH}_2\text{N}$ ), 3.71-3.77 (br.m, 2H;  $\text{CH}_2\text{CHN}$ ), 3.84-3.88 (m, 2H;  $\text{CHCHCH}_2\text{OP}$ ), 3.93-4.01 (m, 2H;  $\text{CH}_2\text{CHN}$ ), 4.09-4.16 (br.m, 1H;  $\text{CH}_2'(\text{allyl}_{syn})$ ), 4.22 and 4.27 (s, 1H and d,  $^3J(\text{H,H}) = 1.2$  Hz, 1H;  $\text{CHCHCH}_2\text{OP}$ ), 4.22 (s, 2H;  $\text{CHCHCH}_2\text{S}$ ), 4.23-4.28 (br.m, 1H;  $\text{CH}_2(\text{allyl}_{syn})$ ), 5.35-5.42 (tt,  $^3J(\text{H,H}) = 13.9$  Hz,  $^3J(\text{H,H}) = 7.0$  Hz, 1H; CH(allyl)), 6.69 and 6.79 (br.d,  $^3J(\text{H,H}) \sim 7.3$  Hz, 1H and br.d,  $^3J(\text{H,H}) \sim 7.2$  Hz, 1H; CH(Ar)), 6.82 and 6.85 (td,  $^3J(\text{H,H}) = 7.5$  Hz,  $^4J(\text{H,H}) = 0.8$  Hz, 1H and td,  $^3J(\text{H,H}) = 7.5$  Hz,  $^4J(\text{H,H}) = 0.9$  Hz, 1H; CH(Ar)), 6.95 and 6.99-7.00 (d,  $^3J(\text{H,H}) = 8.1$  Hz, 2H and m, 2H; *o*-CH(Ph)), 6.99-7.03 (m, 2H; *p*-CH(Ph)), 7.04-7.05 (m, 4H; *o*-CH(Ph)), 7.10-7.21 (m, 12H; CH(Ar)), 7.11-7.13 (m, 2H; *p*-CH(Ph)), 7.16-7.19 (m, 4H; *m*-CH(Ph)), 7.38-7.41 and 7.39-7.42 (m, 2H and m, 2H; *m*-CH(Ph)) ppm.  $^{13}\text{C}\{^1\text{H}\}$  NMR (150.9 MHz,  $\text{CD}_2\text{Cl}_2$ , 30 °C):  $\delta$  = 27.83 and 27.96 (d,  $^3J(\text{C,P}) = 4.9$  Hz and d,  $^3J(\text{C,P}) = 5.7$  Hz;  $\text{CH}_2\text{CH}_2\text{N}$ ), 31.91 and 32.08 (s and s;  $\text{CH}_2$ ), 39.35 and 39.39 (s and s;  $\text{CHCHCH}_2\text{S}$ ), 42.66 and 42.69 (s and s;  $\text{CHCHCH}_2\text{S}$ ), 46.27 (s;  $\text{CHCHCH}_2\text{OP}$ ), 47.55-47.60 (m;  $\text{CHCHCH}_2\text{OP}$ ), 48.59 and 48.69 (s and s;  $\text{CHCHCH}_2\text{S}$ ), 49.51 and 49.86 (d,

## EXPERIMENTAL SECTION

$^2J(\text{C,P}) = 22.1$  Hz and d,  $^2J(\text{C,P}) = 23.2$  Hz;  $\text{CH}_2\text{CH}_2\text{N}$ ), 54.64 and 54.80 (s and s;  $\text{CH}_2\text{CHN}$ ), 63.04 and 63.17 (s and s;  $\text{CH}_2\text{CHN}$ ), 67.17 and 67.37 (d,  $^2J(\text{C,P}) = 11.9$  Hz and d,  $^2J(\text{C,P}) = 12.2$  Hz;  $\text{CHCHCH}_2\text{OP}$ ), 71.59-71.87 (dd,  $^2J(\text{C,P})_{\text{trans}} = 32.1$  Hz,  $^2J(\text{C,P})_{\text{cis}} = 10.4$  Hz;  $\text{CH}_2(\text{allyl})$ ), 72.04-72.33 (dd,  $^2J(\text{C,P})_{\text{trans}} = 32.7$  Hz,  $^2J(\text{C,P})_{\text{cis}} = 10.7$  Hz;  $\text{CH}_2(\text{allyl})$ ), 115.89 and 116.02 (d,  $^3J(\text{C,P}) = 7.4$  Hz and d,  $^3J(\text{C,P}) = 7.1$  Hz; *o*-CH(Ph)), 122.03 and 122.12 (s and s; *p*-CH(Ph)), 123.78 and 123.81 (s and s; CH(Ar)), 123.92 and 123.98 (s and s; CH(Ar)), 124.55 (t,  $^2J(\text{C,P}) = 8.4$  Hz; CH(allyl)), 126.20 (s; CH(Ar)), 126.23 and 126.24 (s and s; CH(Ar)), 126.33 (s; CH(Ar)), 126.65 (s; CH(Ar)), 126.70 and 126.72 (s and s; *p*-CH(Ph)), 126.76 and 126.81 (s and s; CH(Ar)), 127.01 (s; CH(Ar)), 129.34 and 129.38 (s and s; *o*-CH(Ph)), 129.54 and 129.56 (s and s; *m*-CH(Ph)), 130.39 and 130.43 (s and s; *m*-CH(Ph)), 136.29 and 136.31 (s and s; C(Ph)), 139.96 and 140.03 (s and s; C(Ar)), 140.80 and 140.83 (s and s; C(Ar)), 143.14-143.31 (m; C(Ph)), 143.22 and 143.24 (s and s; C(Ar)), 143.91 and 143.94 (s and s; C(Ar)) ppm.  $^{31}\text{P}\{^1\text{H}\}$  NMR (242.9 MHz,  $\text{CD}_2\text{Cl}_2$ , 30 °C)  $\delta = 115.70$  and 115.98 (AB,  $^2J(\text{P,P}) = 92.0$  Hz) ppm.  $\text{C}_{73}\text{H}_{75}\text{BF}_4\text{N}_4\text{O}_2\text{P}_2\text{PdS}_2$  (1358.39): calcd. C 64.48, H 5.56, N 4.12; found C 64.60, H 5.61, N 4.06.

**Table S1.**  $^{31}\text{P}\{^1\text{H}\}$  NMR chemical shifts of novel diamidophosphites and Pd(II) complexes.

| Compound                                               | $\delta_{\text{p}}$                                                      |
|--------------------------------------------------------|--------------------------------------------------------------------------|
| <b>L1a</b>                                             | 121.26 (s)                                                               |
| <b>L1b</b>                                             | 120.58 (s)                                                               |
| <b>L2a</b>                                             | 125.44 (s)                                                               |
| <b>L2b</b>                                             | 129.80 (s)                                                               |
| <b>L3a</b>                                             | 122.29 (s)                                                               |
| <b>L3b</b>                                             | 121.22 (s)                                                               |
| <b>L4</b>                                              | 120.86 (s)                                                               |
| <b>L5a</b>                                             | 121.27 (s)                                                               |
| <b>L5b</b>                                             | 120.64 (s)                                                               |
| $[\text{Pd}(\text{allyl})(\text{L1a})]\text{BF}_4$     | 117.80 (s)                                                               |
| $\text{Pd}(\text{allyl})(\text{L5a})_2(\text{BF}_4)_2$ | 117.29 (s (9%)), 117.65 (s (23%)),<br>117.71 (s (23%)), 118.10 (s (44%)) |
| $\text{Pd}(\text{allyl})(\text{L3a})_2\text{BF}_4$     | 116.23 (s)                                                               |
| $\text{Pd}(\text{allyl})(\text{L4})_2\text{BF}_4$      | 115.90 (br.s)                                                            |
| $\text{Pd}(\text{allyl})(\text{L5b})_2\text{BF}_4$     | 115.70, 115.98 (AB, $^2J(\text{P,P}) = 92.0$ Hz)                         |

## EXPERIMENTAL SECTION

**Palladium-Catalyzed Asymmetric Allylic Alkylation of (*E*)-1,3-Diphenylallyl Acetate with Dimethyl Malonate:** A solution of [Pd(allyl)Cl]<sub>2</sub> (0.001 g, 0.0025 mmol) and the appropriate ligand (0.005 mmol or 0.01 mmol) in the appropriate solvent (1.5 mL) was stirred for 40 min or the appropriate cationic complex (0.005 mmol) was dissolved in the appropriate solvent (1.5 mL). (*E*)-1,3-diphenylallyl acetate (**9**) (0.05 mL, 0.25 mmol) was added and the solution stirred for 15 min. Dimethyl malonate (0.05 mL, 0.44 mmol), BSA (0.11 mL, 0.44 mmol) and KOAc (0.002 g) were added. The reaction mixture was stirred for 24 h, diluted with CH<sub>2</sub>Cl<sub>2</sub> (2 mL) and filtered through a thin layer of SiO<sub>2</sub>. The filtrate was evaporated at reduced pressure (40 Torr) and dried in vacuum (10<sup>-3</sup> Torr) affording a residue containing dimethyl (*E*)-2-(1,3-diphenylallyl)malonate (**10a**).<sup>[27]</sup> In order to evaluate *ee* and conversion, the obtained residue was dissolved in an appropriate eluent mixture (8 mL) and a sample was taken for HPLC analysis.

**Palladium-Catalyzed Asymmetric Allylic Amination of (*E*)-1,3-Diphenylallyl Acetate with Pyrrolidine and Phthalimide:** A solution of [Pd(allyl)Cl]<sub>2</sub> (0.001 g, 0.0025 mmol) and the appropriate ligand (0.005 mmol or 0.01 mmol) in the appropriate solvent (1.5 mL) was stirred for 40 min or the appropriate cationic complex (0.005 mmol) was dissolved in the appropriate solvent (1.5 mL). (*E*)-1,3-diphenylallyl acetate (**9**) (0.05 mL, 0.25 mmol) was added and the solution stirred for 15 min, then freshly distilled pyrrolidine (0.06 mL, 0.75 mmol) or phthalimide (0.045 g, 0.3 mmol) and K<sub>2</sub>CO<sub>3</sub> (0.083 g, 0.6 mmol) were added. The reaction mixture was stirred for 24 h, diluted with CH<sub>2</sub>Cl<sub>2</sub> (2 mL) and filtered through a thin layer of SiO<sub>2</sub>. The filtrate was evaporated at reduced pressure (40 Torr) and dried in vacuum (10<sup>-3</sup> Torr) affording a residue containing (*E*)-1-(1,3-diphenylallyl)pyrrolidine (**10b**)<sup>[28]</sup> or (*E*)-2-(1,3-diphenylallyl)isoindoline-1,3-dione (**10c**).<sup>[23,29]</sup> In order to evaluate *ee* and conversion, the obtained residue was dissolved in an appropriate eluent mixture (8 mL) and a sample was taken for HPLC analysis.

**Palladium-Catalyzed Asymmetric Allylic Alkylation of Cinnamyl Acetate with Ethyl 2-Oxocyclohexane-1-Carboxylate:** A solution of [Pd(allyl)Cl]<sub>2</sub> (0.001 g, 0.0025 mmol) and the appropriate ligand (0.005 mmol or 0.01 mmol) in toluene (1.5 mL) was stirred for 40 min or the appropriate cationic complex (0.005 mmol) was dissolved in toluene (1.5 mL). Cinnamyl acetate (**11**) (0.04 mL, 0.25 mmol) was added and the solution stirred for 15 min. β-Ketoether **12** (0.06 mL, 0.375 mmol), BSA (0.125 mL, 0.5 mmol) and Zn(OAc)<sub>2</sub> (0.005 g) were added. The reaction mixture was stirred for 24 h, diluted with toluene (2 mL) and filtered through a thin layer of SiO<sub>2</sub>. The filtrate was evaporated at reduced pressure (40 Torr) and dried in vacuum (10<sup>-3</sup> Torr) affording a residue containing ethyl 1-cinnamyl-2-oxocyclohexane-1-carboxylate (**13**).<sup>[24a,b]</sup> In order to evaluate *ee* and conversion, the obtained residue was dissolved in an appropriate eluent mixture (8 mL) and a sample was taken for HPLC analysis.



## EXPERIMENTAL SECTION

**Palladium-Catalyzed Asymmetric Allylic Alkylation of Cinnamyl Acetate with Ethyl 2-Acetamido-3-Oxobutanoate:** A solution of  $[\text{Pd}(\text{allyl})\text{Cl}]_2$  (0.001 g, 0.0025 mmol) and the appropriate ligand (0.005 mmol or 0.01 mmol) in toluene (1.5 mL) was stirred for 40 min or the appropriate cationic complex (0.005 mmol) was dissolved in toluene (1.5 mL). Cinnamyl acetate (**11**) (0.04 mL, 0.25 mmol) was added and the solution stirred for 15 min.  $\alpha$ -Acetamido- $\beta$ -Ketoether **14** (0.07 g, 0.375 mmol), BSA (0.125 mL, 0.5 mmol) and KOAc (0.003 g) were added. The reaction mixture was stirred for 24 h, diluted with toluene (2 mL) and filtered through a thin layer of  $\text{SiO}_2$ . The filtrate was evaporated at reduced pressure (40 Torr) and dried in vacuum ( $10^{-3}$  Torr) affording a residue containing ethyl (*E*)-2-acetamido-2-acetyl-5-phenylpent-4-enoate (**15**).<sup>[25a]</sup> In order to evaluate *ee* and conversion, the obtained residue was dissolved in an appropriate eluent mixture (8 mL) and a sample was taken for HPLC analysis.

**Palladium-Catalyzed Asymmetric Allylic Alkylation of Cinnamyl Acetate with 2-Acetyl-3,4-Dihydronaphthalen-1(2H)-one:** A solution of  $[\text{Pd}(\text{allyl})\text{Cl}]_2$  (0.001 g, 0.0025 mmol) and the appropriate ligand (0.005 mmol or 0.01 mmol) in toluene (1.5 mL) was stirred for 40 min or the appropriate cationic complex (0.005 mmol) was dissolved in toluene (1.5 mL). Cinnamyl acetate (**11**) (0.04 mL, 0.25 mmol) was added and the solution stirred for 15 min. 1,3-Diketone **16** (0.047 g, 0.25 mmol), BSA (0.125 mL, 0.5 mmol) and  $\text{Zn}(\text{OAc})_2$  (0.005 g) were added. The reaction mixture was stirred for 24 h, diluted with toluene (2 mL) and filtered through a thin layer of  $\text{SiO}_2$ . The filtrate was evaporated at reduced pressure (40 Torr) and dried in vacuum ( $10^{-3}$  Torr) affording a residue containing 2-acetyl-2-cinnamyl-3,4-dihydronaphthalen-1(2H)-one (**17**).<sup>[30]</sup> In order to evaluate *ee* and conversion, the obtained residue was dissolved in an appropriate eluent mixture (8 mL) and a sample was taken for HPLC analysis.

**Palladium-Catalyzed Asymmetric Allylic Amination of 2-(Diethoxyphosphoryl)-1-Phenylallyl Acetate with Aniline:** A solution of  $[\text{Pd}(\text{allyl})\text{Cl}]_2$  (0.001 g, 0.0025 mmol) and the appropriate ligand (0.005 mmol or 0.01 mmol) in  $\text{CH}_2\text{Cl}_2$  (1.5 mL) was stirred for 40 min or the appropriate cationic complex (0.005 mmol) was dissolved in  $\text{CH}_2\text{Cl}_2$  (1.5 mL). 2-(Diethoxyphosphoryl)-1-phenylallyl acetate (**18**) (0.08 g, 0.25 mmol) was added and the solution stirred for 15 min, then freshly distilled aniline (0.05 mL, 0.5 mmol) and  $\text{K}_2\text{CO}_3$  (0.069 g, 0.5 mmol) were added. The reaction mixture was stirred for 24 h, diluted with  $\text{CH}_2\text{Cl}_2$  (2 mL) and filtered through a thin layer of  $\text{SiO}_2$ . The filtrate was evaporated at reduced pressure (40 Torr) and dried in vacuum ( $10^{-3}$  Torr) affording a residue containing mixture of diethyl (3-phenyl-3-(phenylamino)prop-1-en-2-yl)phosphonate (**19**), (*E*)-diethyl (1-phenyl-3-(phenylamino)prop-1-en-2-yl)phosphonate (**20**) and (*E*)-2-(diethoxyphosphoryl)-3-phenylallyl acetate (**21**).<sup>[21]</sup> Conversion of **18** and the ratio of **19/20/21** were determined by  $^{31}\text{P}$  NMR spectroscopy in  $\text{CHCl}_3$ . In order to evaluate *ee*,

## EXPERIMENTAL SECTION

the obtained residue was dissolved in an appropriate eluent mixture (8 mL) and a sample was taken for HPLC analysis.

**CRYSTAL DATA FOR NEW LIGANDS**
**Table S2.** Crystal data for **L1a** and **L1b** (single-crystals).

|                                                     | <b>L1a</b>                                                                   | <b>L1b</b>                                                                   |
|-----------------------------------------------------|------------------------------------------------------------------------------|------------------------------------------------------------------------------|
| CCDC number                                         | 2055283                                                                      | 2055284                                                                      |
| empirical formula                                   | C <sub>40</sub> H <sub>44</sub> N <sub>4</sub> O <sub>2</sub> P <sub>2</sub> | C <sub>40</sub> H <sub>44</sub> N <sub>4</sub> O <sub>2</sub> P <sub>2</sub> |
| formula weight                                      | 674.73                                                                       | 674.73                                                                       |
| T, K                                                | 293(2)                                                                       | 293(2)                                                                       |
| wavelength, Å                                       | 1.54086                                                                      | 1.54086                                                                      |
| crystal system                                      | orthorhombic                                                                 | orthorhombic                                                                 |
| space group                                         | <i>P2<sub>1</sub>2<sub>1</sub>2<sub>1</sub></i>                              | <i>P2<sub>1</sub>2<sub>1</sub>2<sub>1</sub></i>                              |
| <i>a</i> , Å                                        | 9.4156(4)                                                                    | 9.0658(2)                                                                    |
| <i>b</i> , Å                                        | 17.1568(7)                                                                   | 17.9593(6)                                                                   |
| <i>c</i> , Å                                        | 22.3751(7)                                                                   | 22.1974(8)                                                                   |
| volume, Å <sup>3</sup>                              | 3614.5(2)                                                                    | 3614.08(19)                                                                  |
| Z                                                   | 4                                                                            | 4                                                                            |
| D <sub>x</sub> , g cm <sup>-3</sup>                 | 1.240                                                                        | 1.240                                                                        |
| μ, mm <sup>-1</sup>                                 | 1.404                                                                        | 1.404                                                                        |
| crystal size, mm <sup>3</sup>                       | 0.22 x 0.15 x 0.13                                                           | 0.12 x 0.11 x 0.10                                                           |
| θ <sub>min</sub> – θ <sub>max</sub> , °             | 3.95 – 70.95                                                                 | 3.98 – 68.37                                                                 |
| <i>hkl</i> range                                    | -11 ≤ <i>h</i> ≤ 5, -21 ≤ <i>k</i> ≤ 19, -26 ≤ <i>l</i> ≤ 27                 | -7 ≤ <i>h</i> ≤ 10, -21 ≤ <i>k</i> ≤ 20, -26 ≤ <i>l</i> ≤ 26                 |
| reflections collected                               | 20930                                                                        | 25176                                                                        |
| independent reflections                             | 6402 [ <i>R</i> <sub>int</sub> = 0.143]                                      | 6534 [ <i>R</i> <sub>int</sub> = 0.044]                                      |
| goodness-of-fit                                     | 0.614                                                                        | 1.107                                                                        |
| data/restraints/parameters                          | 6402 / 0 / 434                                                               | 6534 / 0 / 434                                                               |
| Final <i>R</i> indices [ <i>I</i> > 2σ( <i>I</i> )] | <i>R</i> <sub>1</sub> = 0.0433, <i>wR</i> <sub>2</sub> = 0.0656              | <i>R</i> <sub>1</sub> = 0.0445, <i>wR</i> <sub>2</sub> = 0.1197              |
| Absolute structure parameter                        | -0.01(3)                                                                     | -0.002(8)                                                                    |
| Largest diff. peak/hole, e·Å <sup>-3</sup>          | 0.191 / -0.234                                                               | 0.316 / -0.235                                                               |

## CRYSTAL DATA FOR NEW LIGANDS

**Table S3.** Crystal data for **L4** and **L5a** (powders).

|                                                                                       | <b>L5a</b>                                         | <b>L4</b>                                                          |
|---------------------------------------------------------------------------------------|----------------------------------------------------|--------------------------------------------------------------------|
| CCDC number                                                                           | 2056573                                            | 2056574                                                            |
| empirical formula                                                                     | C <sub>35</sub> H <sub>35</sub> N <sub>2</sub> OPS | C <sub>40</sub> H <sub>40</sub> FeN <sub>3</sub> OP                |
| T, K                                                                                  | 293(2)                                             | 293(2)                                                             |
| formula weight                                                                        | 562.68                                             | 665.57                                                             |
| particle morphology, color                                                            | needle, colorless                                  | prism, brown                                                       |
| wavelength, Å                                                                         | 0.354345(4)                                        | 0.354345(4)                                                        |
| crystal system                                                                        | monoclinic                                         | orthorhombic                                                       |
| space group                                                                           | <i>P2</i> <sub>1</sub>                             | <i>P2</i> <sub>1</sub> <i>2</i> <sub>1</sub> <i>2</i> <sub>1</sub> |
| <i>a</i> , Å                                                                          | 16.6231(12)                                        | 22.3219(13)                                                        |
| <i>b</i> , Å                                                                          | 11.4030(10)                                        | 18.9753(12)                                                        |
| <i>c</i> , Å                                                                          | 10.4537(9)                                         | 8.0785(8)                                                          |
| $\beta$ , °                                                                           | 95.968(12)                                         | 90                                                                 |
| volume, Å <sup>3</sup>                                                                | 1496.6(2)                                          | 3421.8(5)                                                          |
| Z                                                                                     | 2                                                  | 4                                                                  |
| <i>M</i> <sub>20</sub> <sup>a</sup>                                                   | 94                                                 | 110                                                                |
| <i>F</i> <sub>30</sub> <sup>b</sup>                                                   | 152 (0.003, 43)                                    | 233 (0.002, 34)                                                    |
| <i>D</i> <sub>x</sub> , g cm <sup>-3</sup>                                            | 1.249                                              | 1.292                                                              |
| 2 $\theta$ <sub>min</sub> – 2 $\theta$ <sub>max</sub> , increment, °                  | 1.300 – 20.000, 0.002                              | 1.300 – 20.000, 0.002                                              |
| no. params/restraints                                                                 | 191/135                                            | 211/175                                                            |
| <i>R</i> <sub>p</sub> / <i>R</i> <sub>wp</sub> / <i>R</i> <sub>exp</sub> <sup>c</sup> | 0.0313/0.0409/0.0166                               | 0.0327/0.0461/0.0165                                               |
| goodness-of-fit                                                                       | 2.455                                              | 2.798                                                              |

<sup>a</sup> *M*<sub>20</sub> is defined according to<sup>[31]</sup>. <sup>b</sup> *F*<sub>30</sub> is defined according to<sup>[32]</sup>. <sup>c</sup> *R*<sub>p</sub>, *R*<sub>wp</sub> and *R*<sub>exp</sub> are defined according to<sup>[33]</sup>.

## CRYSTAL DATA FOR NEW LIGANDS

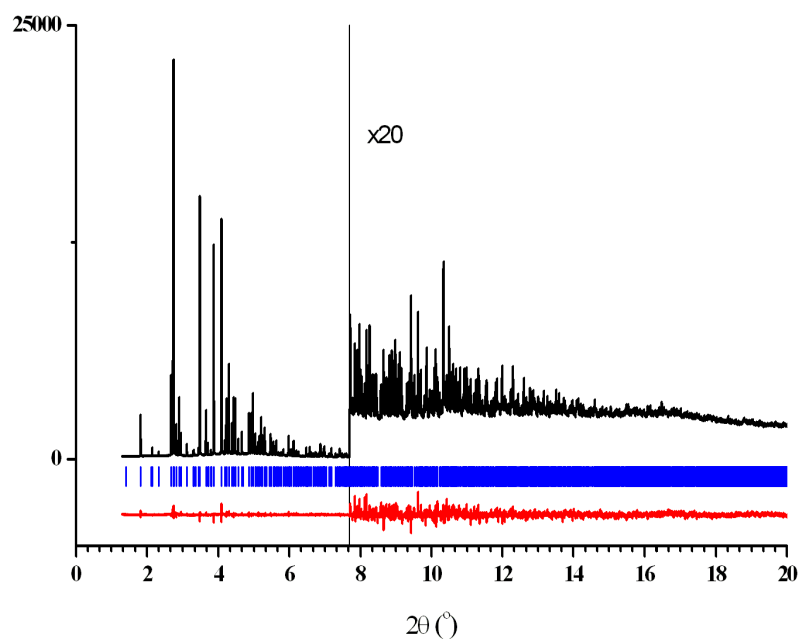

**Figure S1.** The final Rietveld plot for **L4**, showing the experimental and difference diffraction profiles as black (top) and red (bottom) curves, respectively. The vertical blue bars correspond to the calculated positions of the Bragg peaks.

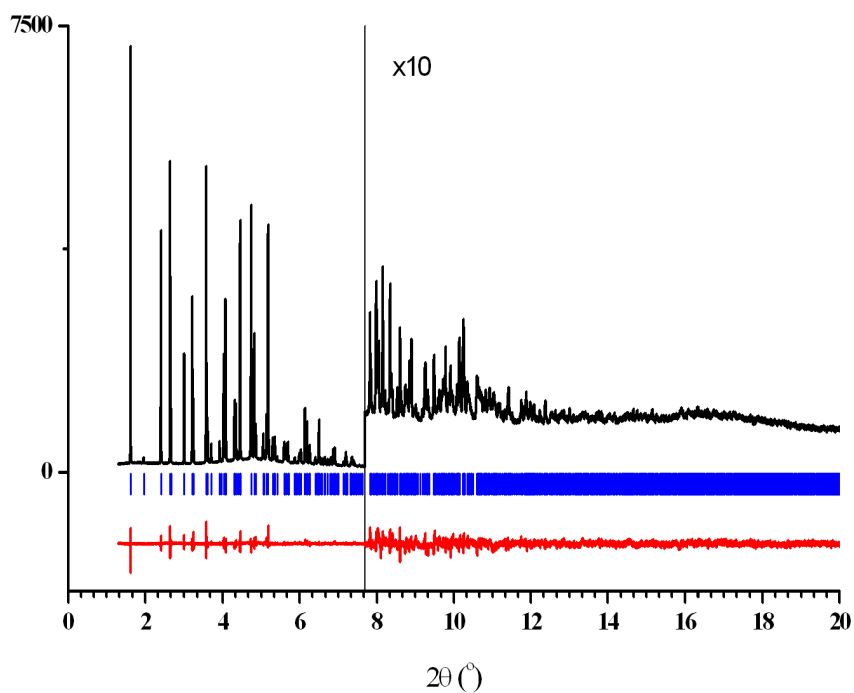

**Figure S2.** The final Rietveld plot for **L5a**, showing the experimental and difference diffraction profiles as black (top) and red (bottom) curves, respectively. The vertical blue bars correspond to the calculated positions of the Bragg peaks.

## CRYSTAL DATA FOR NEW LIGANDS

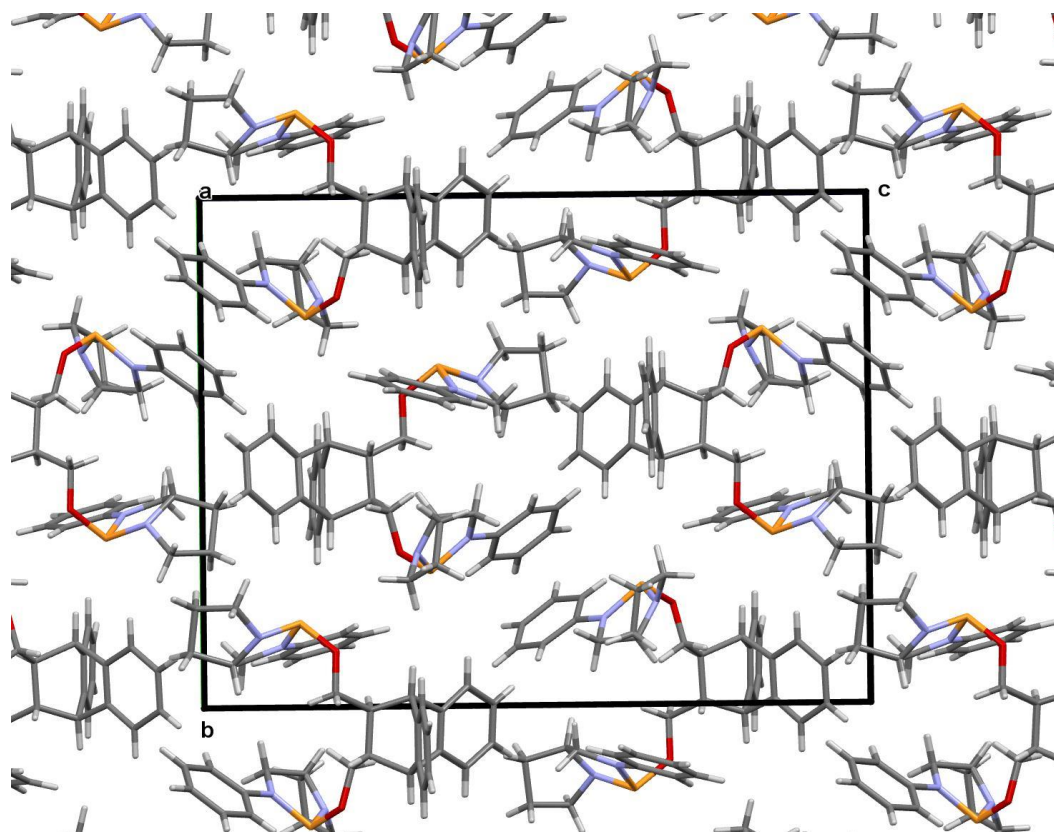

**Figure S3.** A portion of the crystal packing in **L1a** viewed down the axis *a*.

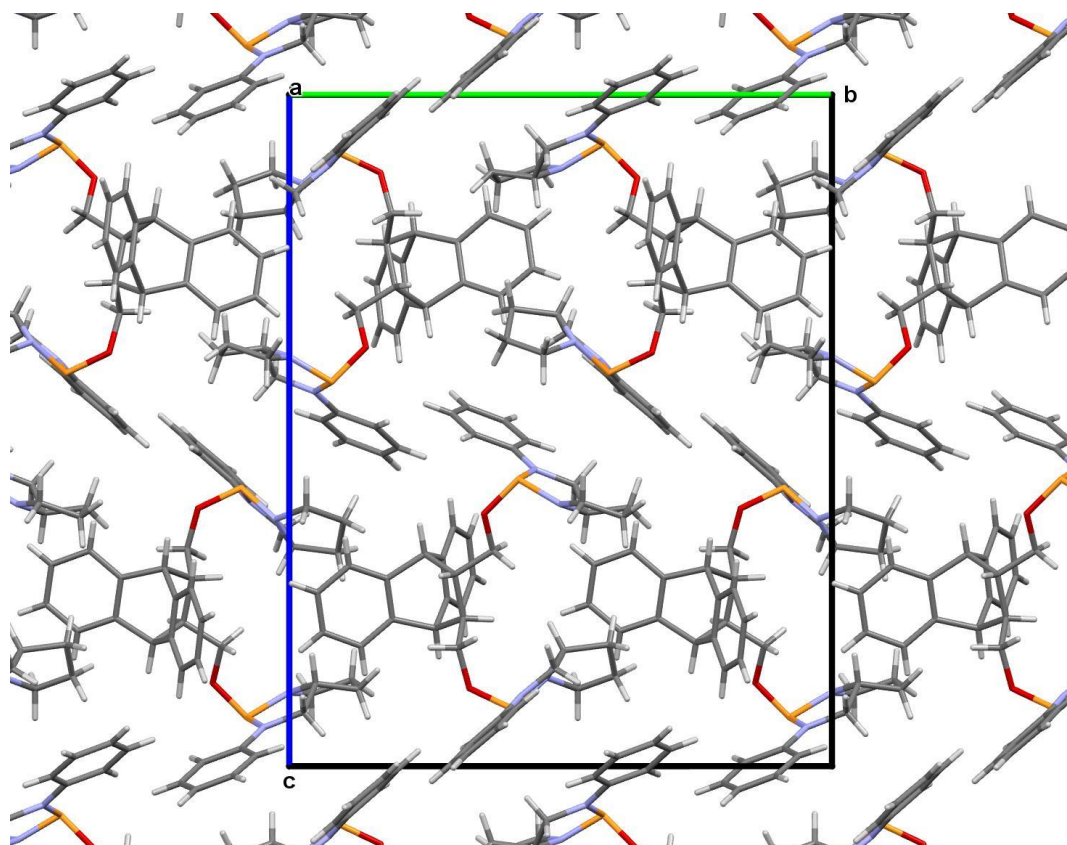

**Figure S4.** A portion of the crystal packing in **L1b** viewed down the axis *a*.

## CRYSTAL DATA FOR NEW LIGANDS

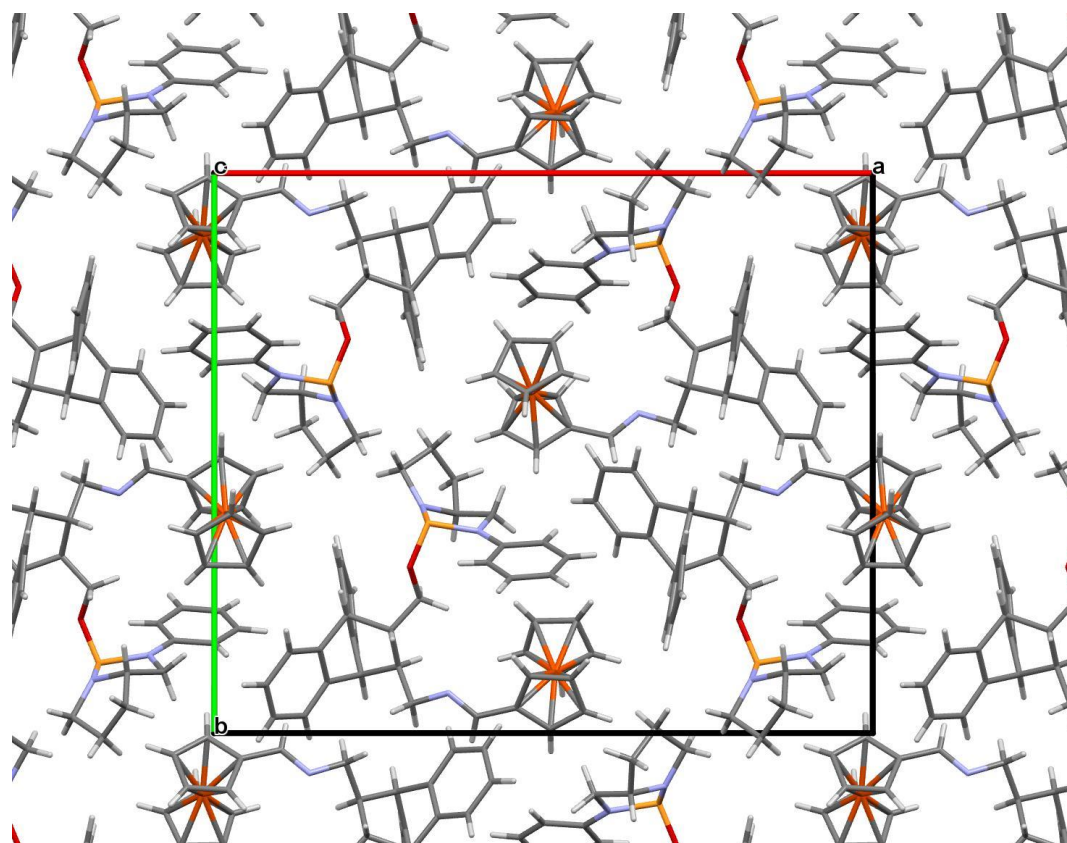

**Figure S5.** A portion of the crystal packing in **L4** viewed along the axis *c*.

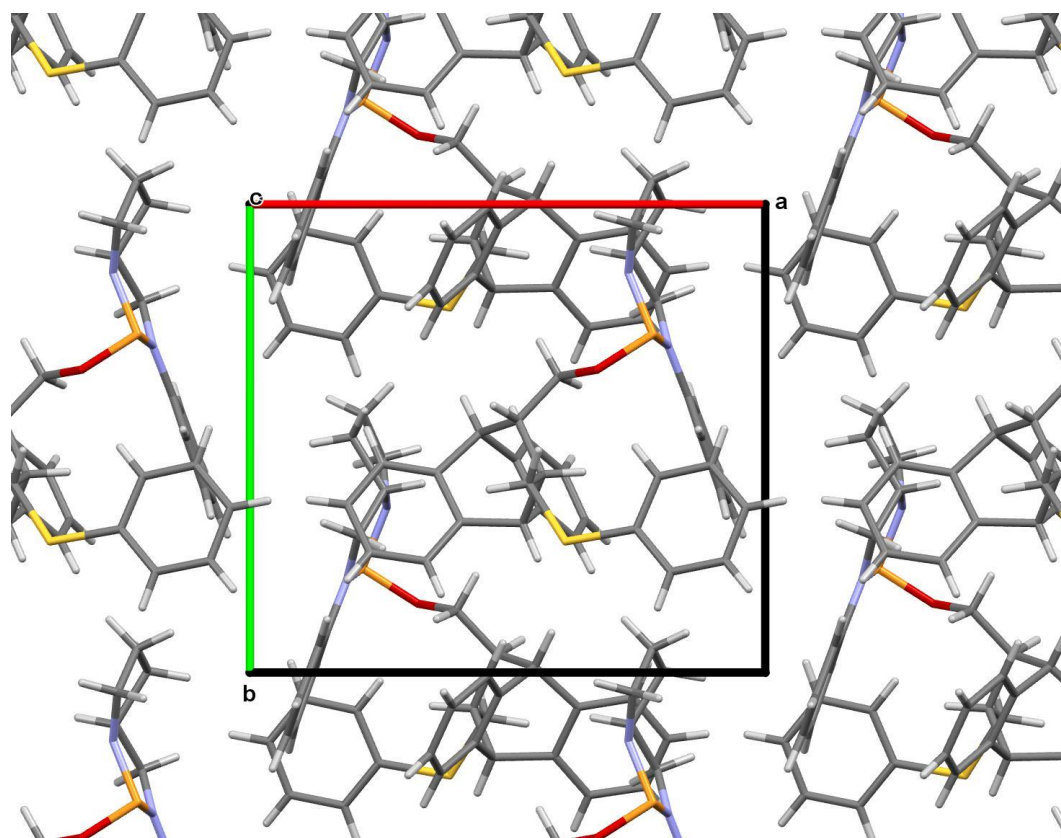

**Figure S6.** A portion of the crystal packing in **L5a** viewed along the axis *c*.

## CALCULATED STRUCTURES OF PALLADIUM(II) COMPLEXES

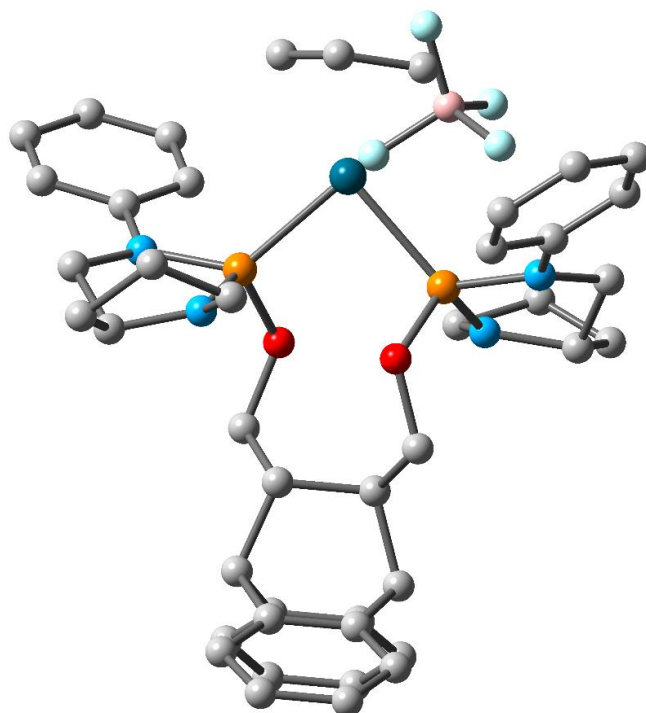

**Figure S7.** Calculated structure of  $[\text{Pd}(\text{allyl})(\text{L1a})]\text{BF}_4$ .

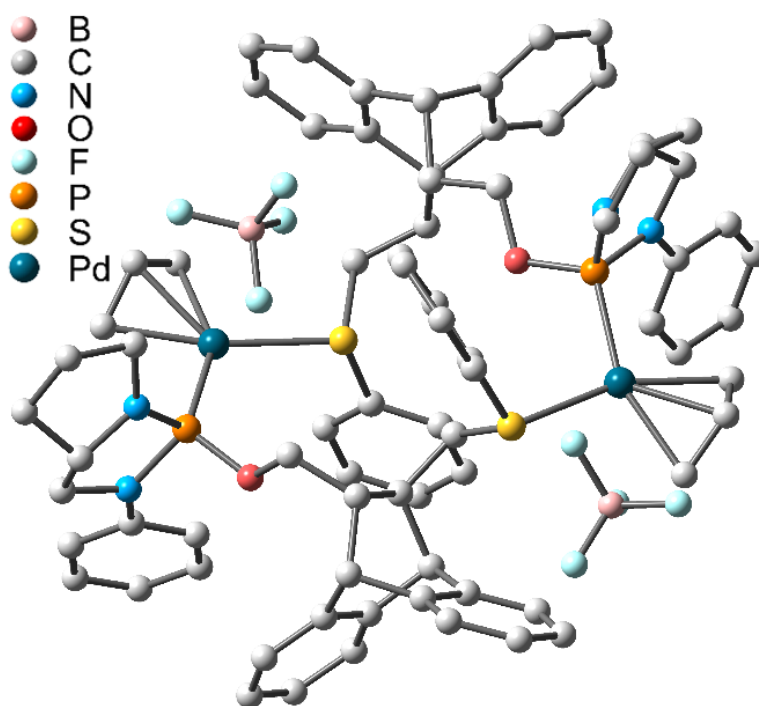

**Figure S8.** Calculated structure of  $[\text{Pd}(\text{allyl})(\text{L5a})]_2(\text{BF}_4)_2$ .



## CATALYTIC RESULTS

**Table S4.** Pd-catalyzed allylic alkylation of **9** with dimethyl malonate.<sup>[a]</sup>

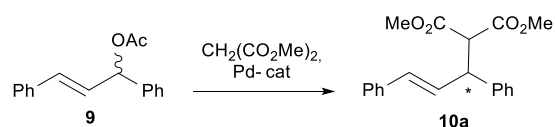

| Entry | Compound                                               | L/Pd | Solvent                         | Conversion [%] | Ee [%] <sup>[b,c]</sup> |
|-------|--------------------------------------------------------|------|---------------------------------|----------------|-------------------------|
| 1     | <b>L1a</b>                                             | 1    | THF                             | 100            | 98 (S)                  |
| 2     | <b>L1a</b>                                             | 2    | THF                             | 100            | 96 (S)                  |
| 3     | <b>L1a</b>                                             | 1    | CH <sub>2</sub> Cl <sub>2</sub> | 100            | 98 (S)                  |
| 4     | <b>L1a</b>                                             | 2    | CH <sub>2</sub> Cl <sub>2</sub> | 100            | 98 (S)                  |
| 5     | [Pd(allyl)( <b>L1a</b> )]BF <sub>4</sub>               | 1    | THF                             | 100            | 98 (S)                  |
| 6     | [Pd(allyl)( <b>L1a</b> )]BF <sub>4</sub>               | 1    | CH <sub>2</sub> Cl <sub>2</sub> | 100            | 97 (S)                  |
| 7     | <b>L1b</b>                                             | 1    | THF                             | 97             | 89 (R)                  |
| 8     | <b>L1b</b>                                             | 2    | THF                             | 58             | 92 (R)                  |
| 9     | <b>L1b</b>                                             | 1    | CH <sub>2</sub> Cl <sub>2</sub> | 100            | 95 (R)                  |
| 10    | <b>L1b</b>                                             | 2    | CH <sub>2</sub> Cl <sub>2</sub> | 100            | 92 (R)                  |
| 11    | <b>L2a</b>                                             | 1    | THF                             | 100            | 78 (S)                  |
| 12    | <b>L2a</b>                                             | 2    | THF                             | 100            | 78 (S)                  |
| 13    | <b>L2a</b>                                             | 1    | CH <sub>2</sub> Cl <sub>2</sub> | 100            | 85 (S)                  |
| 14    | <b>L2a</b>                                             | 2    | CH <sub>2</sub> Cl <sub>2</sub> | 100            | 85 (S)                  |
| 15    | <b>L2b</b>                                             | 1    | THF                             | 100            | 19 (R)                  |
| 16    | <b>L2b</b>                                             | 2    | THF                             | 100            | 20 (R)                  |
| 17    | <b>L2b</b>                                             | 1    | CH <sub>2</sub> Cl <sub>2</sub> | 100            | 8 (R)                   |
| 18    | <b>L2b</b>                                             | 2    | CH <sub>2</sub> Cl <sub>2</sub> | 100            | 8 (R)                   |
| 19    | <b>L3a</b>                                             | 1    | THF                             | 91             | 86 (S)                  |
| 20    | <b>L3a</b>                                             | 2    | THF                             | 93             | 87 (S)                  |
| 21    | <b>L3a</b>                                             | 1    | CH <sub>2</sub> Cl <sub>2</sub> | 100            | 92 (S)                  |
| 22    | <b>L3a</b>                                             | 2    | CH <sub>2</sub> Cl <sub>2</sub> | 100            | 94 (S)                  |
| 23    | [Pd(allyl)( <b>L3a</b> ) <sub>2</sub> ]BF <sub>4</sub> | 2    | CH <sub>2</sub> Cl <sub>2</sub> | 100            | 93 (S)                  |
| 24    | <b>L3b</b>                                             | 1    | CH <sub>2</sub> Cl <sub>2</sub> | 100            | 85 (R)                  |
| 25    | <b>L3b</b>                                             | 2    | CH <sub>2</sub> Cl <sub>2</sub> | 100            | 92 (R)                  |
| 26    | <b>L4</b>                                              | 1    | THF                             | 100            | 88 (S)                  |
| 27    | <b>L4</b>                                              | 2    | THF                             | 100            | 90 (S)                  |
| 28    | <b>L4</b>                                              | 1    | CH <sub>2</sub> Cl <sub>2</sub> | 100            | 91 (S)                  |
| 29    | <b>L4</b>                                              | 2    | CH <sub>2</sub> Cl <sub>2</sub> | 100            | 93 (S)                  |
| 30    | [Pd(allyl)( <b>L4</b> ) <sub>2</sub> ]BF <sub>4</sub>  | 2    | CH <sub>2</sub> Cl <sub>2</sub> | 100            | 90 (S)                  |

## CATALYTIC RESULTS

|    |                                                                        |   |                                 |     |        |
|----|------------------------------------------------------------------------|---|---------------------------------|-----|--------|
| 31 | <b>L5a</b>                                                             | 1 | THF                             | 93  | 87 (S) |
| 32 | <b>L5a</b>                                                             | 2 | THF                             | 91  | 87 (S) |
| 33 | <b>L5a</b>                                                             | 1 | CH <sub>2</sub> Cl <sub>2</sub> | 100 | 83 (S) |
| 34 | <b>L5a</b>                                                             | 2 | CH <sub>2</sub> Cl <sub>2</sub> | 100 | 92 (S) |
| 35 | [Pd(allyl)( <b>L5a</b> ) <sub>2</sub> ](BF <sub>4</sub> ) <sub>2</sub> | 1 | CH <sub>2</sub> Cl <sub>2</sub> | 100 | 91 (S) |
| 36 | <b>L5b</b>                                                             | 1 | THF                             | 100 | 91 (R) |
| 37 | <b>L5b</b>                                                             | 2 | THF                             | 100 | 90 (R) |
| 38 | <b>L5b</b>                                                             | 1 | CH <sub>2</sub> Cl <sub>2</sub> | 100 | 93 (R) |
| 39 | <b>L5b</b>                                                             | 2 | CH <sub>2</sub> Cl <sub>2</sub> | 100 | 94 (R) |
| 40 | [Pd(allyl)( <b>L5b</b> ) <sub>2</sub> ](BF <sub>4</sub> ) <sub>2</sub> | 2 | CH <sub>2</sub> Cl <sub>2</sub> | 100 | 94 (R) |

[a] All reactions were carried out with 1 mol% of [Pd(allyl)Cl]<sub>2</sub> at room temperature for 24 h (BSA, KOAc). [b] The conversion of substrate **9** and enantiomeric excess of **10a** were determined by HPLC (Kromasil 5-CelluCoat, C<sub>6</sub>H<sub>14</sub>/iPrOH = 99/1, 0.6 mL/min, 254 nm, *t*(R) = 19.4 min, *t*(S) = 20.8 min). [c] The absolute configurations were assigned by comparison of the HPLC retention times reported in the literature.<sup>[9,34]</sup>

**Table S5.** Pd-catalyzed allylic amination of **9** with pyrrolidine and phthalimide.<sup>[a]</sup>

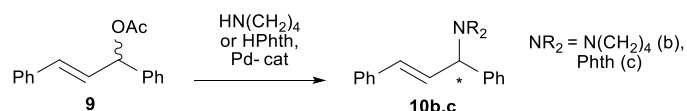

| Entry | Compound                                 | L/Pd | Solvent                         | Product    | Conversion [%] | <i>Ee</i> [%] <sup>[b,c]</sup> |
|-------|------------------------------------------|------|---------------------------------|------------|----------------|--------------------------------|
| 1     | <b>L1a</b>                               | 1    | THF                             | <b>10b</b> | 100            | 96 (R)                         |
| 2     | <b>L1a</b>                               | 2    | THF                             | <b>10b</b> | 100            | 94 (R)                         |
| 3     | <b>L1a</b>                               | 1    | CH <sub>2</sub> Cl <sub>2</sub> | <b>10b</b> | 100            | 45 (R)                         |
| 4     | <b>L1a</b>                               | 2    | CH <sub>2</sub> Cl <sub>2</sub> | <b>10b</b> | 100            | 67 (R)                         |
| 5     | <b>L1a</b>                               | 1    | CH <sub>2</sub> Cl <sub>2</sub> | <b>10c</b> | 100            | 98 (R)                         |
| 6     | [Pd(allyl)( <b>L1a</b> )]BF <sub>4</sub> | 1    | THF                             | <b>10b</b> | 100            | 97 (R)                         |
| 7     | [Pd(allyl)( <b>L1a</b> )]BF <sub>4</sub> | 1    | CH <sub>2</sub> Cl <sub>2</sub> | <b>10b</b> | 100            | 59 (R)                         |
| 8     | [Pd(allyl)( <b>L1a</b> )]BF <sub>4</sub> | 1    | CH <sub>2</sub> Cl <sub>2</sub> | <b>10c</b> | 100            | 98 (R)                         |
| 9     | <b>L1b</b>                               | 1    | THF                             | <b>10b</b> | 99             | 94 (S)                         |
| 10    | <b>L1b</b>                               | 2    | THF                             | <b>10b</b> | 97             | 93 (S)                         |
| 11    | <b>L1b</b>                               | 1    | CH <sub>2</sub> Cl <sub>2</sub> | <b>10b</b> | 100            | 93 (S)                         |
| 12    | <b>L1b</b>                               | 2    | CH <sub>2</sub> Cl <sub>2</sub> | <b>10b</b> | 100            | 87 (S)                         |
| 13    | <b>L1b</b>                               | 1    | CH <sub>2</sub> Cl <sub>2</sub> | <b>10c</b> | 100            | 97 (S)                         |
| 14    | <b>L2a</b>                               | 1    | THF                             | <b>10b</b> | 100            | 46 (R)                         |
| 15    | <b>L2a</b>                               | 2    | THF                             | <b>10b</b> | 100            | 50 (R)                         |
| 16    | <b>L2a</b>                               | 1    | CH <sub>2</sub> Cl <sub>2</sub> | <b>10b</b> | 100            | 55 (R)                         |

## CATALYTIC RESULTS

|    |                                                                        |   |                                 |            |     |                 |
|----|------------------------------------------------------------------------|---|---------------------------------|------------|-----|-----------------|
| 17 | <b>L2a</b>                                                             | 2 | CH <sub>2</sub> Cl <sub>2</sub> | <b>10b</b> | 100 | 29 ( <i>R</i> ) |
| 18 | <b>L2a</b>                                                             | 1 | CH <sub>2</sub> Cl <sub>2</sub> | <b>10c</b> | 18  | 63 ( <i>R</i> ) |
| 19 | <b>L2b</b>                                                             | 1 | THF                             | <b>10b</b> | 100 | 48 ( <i>S</i> ) |
| 20 | <b>L2b</b>                                                             | 2 | THF                             | <b>10b</b> | 100 | 34 ( <i>S</i> ) |
| 21 | <b>L2b</b>                                                             | 1 | CH <sub>2</sub> Cl <sub>2</sub> | <b>10b</b> | 100 | 42 ( <i>S</i> ) |
| 22 | <b>L2b</b>                                                             | 2 | CH <sub>2</sub> Cl <sub>2</sub> | <b>10b</b> | 100 | 29 ( <i>S</i> ) |
| 23 | <b>L2b</b>                                                             | 1 | CH <sub>2</sub> Cl <sub>2</sub> | <b>10c</b> | 17  | 18 ( <i>S</i> ) |
| 24 | <b>L3a</b>                                                             | 1 | THF                             | <b>10b</b> | 88  | 90 ( <i>R</i> ) |
| 25 | <b>L3a</b>                                                             | 2 | THF                             | <b>10b</b> | 100 | 93 ( <i>R</i> ) |
| 26 | <b>L3a</b>                                                             | 1 | CH <sub>2</sub> Cl <sub>2</sub> | <b>10b</b> | 100 | 79 ( <i>R</i> ) |
| 27 | <b>L3a</b>                                                             | 2 | CH <sub>2</sub> Cl <sub>2</sub> | <b>10b</b> | 100 | 83 ( <i>R</i> ) |
| 28 | <b>L3a</b>                                                             | 1 | CH <sub>2</sub> Cl <sub>2</sub> | <b>10c</b> | 0   | -               |
| 29 | <b>L3a</b>                                                             | 2 | CH <sub>2</sub> Cl <sub>2</sub> | <b>10c</b> | 94  | 95 ( <i>R</i> ) |
| 30 | [Pd(allyl)( <b>L3a</b> ) <sub>2</sub> ]BF <sub>4</sub>                 | 2 | THF                             | <b>10b</b> | 100 | 75 ( <i>R</i> ) |
| 31 | [Pd(allyl)( <b>L3a</b> ) <sub>2</sub> ]BF <sub>4</sub>                 | 2 | CH <sub>2</sub> Cl <sub>2</sub> | <b>10c</b> | 18  | 95 ( <i>R</i> ) |
| 32 | <b>L3b</b>                                                             | 1 | THF                             | <b>10b</b> | 36  | 91 ( <i>S</i> ) |
| 33 | <b>L3b</b>                                                             | 2 | THF                             | <b>10b</b> | 100 | 91 ( <i>S</i> ) |
| 34 | <b>L3b</b>                                                             | 1 | CH <sub>2</sub> Cl <sub>2</sub> | <b>10c</b> | 0   | -               |
| 35 | <b>L3b</b>                                                             | 2 | CH <sub>2</sub> Cl <sub>2</sub> | <b>10c</b> | 32  | 94 ( <i>S</i> ) |
| 36 | <b>L4</b>                                                              | 1 | THF                             | <b>10b</b> | 100 | 91 ( <i>R</i> ) |
| 37 | <b>L4</b>                                                              | 2 | THF                             | <b>10b</b> | 100 | 92 ( <i>R</i> ) |
| 38 | <b>L4</b>                                                              | 1 | CH <sub>2</sub> Cl <sub>2</sub> | <b>10b</b> | 100 | 76 ( <i>R</i> ) |
| 39 | <b>L4</b>                                                              | 2 | CH <sub>2</sub> Cl <sub>2</sub> | <b>10b</b> | 100 | 68 ( <i>R</i> ) |
| 40 | <b>L4</b>                                                              | 1 | CH <sub>2</sub> Cl <sub>2</sub> | <b>10c</b> | 0   | -               |
| 41 | <b>L4</b>                                                              | 2 | CH <sub>2</sub> Cl <sub>2</sub> | <b>10c</b> | 93  | 95 ( <i>R</i> ) |
| 42 | [Pd(allyl)( <b>L4</b> ) <sub>2</sub> ]BF <sub>4</sub>                  | 2 | THF                             | <b>10b</b> | 81  | 90 ( <i>R</i> ) |
| 43 | [Pd(allyl)( <b>L4</b> ) <sub>2</sub> ]BF <sub>4</sub>                  | 2 | CH <sub>2</sub> Cl <sub>2</sub> | <b>10c</b> | 17  | 95 ( <i>R</i> ) |
| 44 | <b>L5a</b>                                                             | 1 | THF                             | <b>10b</b> | 83  | 91 ( <i>R</i> ) |
| 45 | <b>L5a</b>                                                             | 2 | THF                             | <b>10b</b> | 99  | 92 ( <i>R</i> ) |
| 46 | <b>L5a</b>                                                             | 1 | CH <sub>2</sub> Cl <sub>2</sub> | <b>10b</b> | 100 | 82 ( <i>R</i> ) |
| 47 | <b>L5a</b>                                                             | 2 | CH <sub>2</sub> Cl <sub>2</sub> | <b>10b</b> | 100 | 83 ( <i>R</i> ) |
| 48 | <b>L5a</b>                                                             | 1 | CH <sub>2</sub> Cl <sub>2</sub> | <b>10c</b> | 0   | -               |
| 49 | <b>L5a</b>                                                             | 2 | CH <sub>2</sub> Cl <sub>2</sub> | <b>10c</b> | 58  | 94 ( <i>R</i> ) |
| 50 | [Pd(allyl)( <b>L5a</b> ) <sub>2</sub> ](BF <sub>4</sub> ) <sub>2</sub> | 1 | THF                             | <b>10b</b> | 100 | 88 ( <i>R</i> ) |
| 51 | [Pd(allyl)( <b>L5a</b> ) <sub>2</sub> ](BF <sub>4</sub> ) <sub>2</sub> | 1 | CH <sub>2</sub> Cl <sub>2</sub> | <b>10c</b> | 0   | -               |

## CATALYTIC RESULTS

|    |                                                        |   |                                 |            |     |                 |
|----|--------------------------------------------------------|---|---------------------------------|------------|-----|-----------------|
| 52 | <b>L5b</b>                                             | 1 | THF                             | <b>10b</b> | 100 | 93 ( <i>S</i> ) |
| 53 | <b>L5b</b>                                             | 2 | THF                             | <b>10b</b> | 100 | 92 ( <i>S</i> ) |
| 54 | <b>L5b</b>                                             | 1 | CH <sub>2</sub> Cl <sub>2</sub> | <b>10b</b> | 100 | 83 ( <i>S</i> ) |
| 55 | <b>L5b</b>                                             | 2 | CH <sub>2</sub> Cl <sub>2</sub> | <b>10b</b> | 100 | 78 ( <i>S</i> ) |
| 56 | <b>L5b</b>                                             | 1 | CH <sub>2</sub> Cl <sub>2</sub> | <b>10c</b> | 0   | -               |
| 57 | <b>L5b</b>                                             | 2 | CH <sub>2</sub> Cl <sub>2</sub> | <b>10c</b> | 100 | 95 ( <i>S</i> ) |
| 58 | [Pd(allyl)( <b>L5b</b> ) <sub>2</sub> ]BF <sub>4</sub> | 2 | THF                             | <b>10b</b> | 100 | 75 ( <i>S</i> ) |
| 59 | [Pd(allyl)( <b>L5b</b> ) <sub>2</sub> ]BF <sub>4</sub> | 2 | CH <sub>2</sub> Cl <sub>2</sub> | <b>10c</b> | 42  | 95 ( <i>S</i> ) |

[a] All reactions were carried out with 1 mol% of [Pd(allyl)Cl]<sub>2</sub> at room temperature for 24 h. [b] The conversion of substrate **9** and enantiomeric excess of **10b** were determined by HPLC (Daicel Chiralcel OD-H, C<sub>6</sub>H<sub>14</sub>/*i*PrOH/Et<sub>2</sub>NH = 200/1/0.1, 0.4 mL/min, 254 nm, *t*(*R*) = 13.7 min, *t*(*S*) = 15.5 min); **10c** – (Daicel Chiralcel OD-H, C<sub>6</sub>H<sub>14</sub>/*i*PrOH = 9/1, 1.0 mL/min, 254 nm, *t*(*S*) = 7.3 min, *t*(*R*) = 8.4 min). [c] The absolute configurations was assigned by comparison of the HPLC retention times reported in the literature.<sup>[9,28b,34a,35]</sup>

**Table S6.** Pd-catalyzed allylic alkylation of **11** with **12**.<sup>[a]</sup>

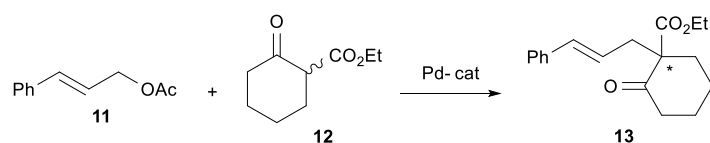

| Entry | Compound                                               | L/Pd | Conversion [%] | <i>Ee</i> [%] <sup>[b,c]</sup> |
|-------|--------------------------------------------------------|------|----------------|--------------------------------|
| 1     | <b>L1a</b>                                             | 1    | 100            | 59 ( <i>S</i> )                |
| 2     | <b>L1a</b>                                             | 2    | 83             | 62 ( <i>S</i> )                |
| 3     | [Pd(allyl)( <b>L1a</b> )]BF <sub>4</sub>               | 1    | 59             | 57 ( <i>S</i> )                |
| 4     | <b>L1b</b>                                             | 1    | 100            | 84 ( <i>R</i> )                |
| 5     | <b>L1b</b>                                             | 2    | 100            | 81 ( <i>R</i> )                |
| 6     | <b>L2a</b>                                             | 1    | 100            | 65 ( <i>R</i> )                |
| 7     | <b>L2a</b>                                             | 2    | 100            | 64 ( <i>R</i> )                |
| 8     | <b>L2b</b>                                             | 1    | 97             | 36 ( <i>S</i> )                |
| 9     | <b>L2b</b>                                             | 2    | 96             | 38 ( <i>S</i> )                |
| 10    | <b>L3a</b>                                             | 1    | 31             | 85 ( <i>S</i> )                |
| 11    | <b>L3a</b>                                             | 2    | 100            | 88 ( <i>S</i> )                |
| 12    | [Pd(allyl)( <b>L3a</b> ) <sub>2</sub> ]BF <sub>4</sub> | 2    | 100            | 74 ( <i>S</i> )                |
| 13    | <b>L3b</b>                                             | 1    | 39             | 80 ( <i>R</i> )                |
| 14    | <b>L3b</b>                                             | 2    | 100            | 88 ( <i>R</i> )                |
| 15    | <b>L4</b>                                              | 1    | 27             | 85 ( <i>S</i> )                |
| 16    | <b>L4</b>                                              | 2    | 100            | 87 ( <i>S</i> )                |
| 17    | [Pd(allyl)( <b>L4</b> ) <sub>2</sub> ]BF <sub>4</sub>  | 2    | 100            | 80 ( <i>S</i> )                |

## CATALYTIC RESULTS

|    |                                                                        |   |    |                 |
|----|------------------------------------------------------------------------|---|----|-----------------|
| 18 | <b>L5a</b>                                                             | 1 | 15 | 69 ( <i>S</i> ) |
| 19 | <b>L5a</b>                                                             | 2 | 99 | 86 ( <i>S</i> ) |
| 20 | [Pd(allyl)( <b>L5a</b> ) <sub>2</sub> ](BF <sub>4</sub> ) <sub>2</sub> | 1 | 22 | 77 ( <i>S</i> ) |
| 21 | <b>L5b</b>                                                             | 1 | 10 | 89 ( <i>R</i> ) |
| 22 | <b>L5b</b>                                                             | 2 | 81 | 90 ( <i>R</i> ) |
| 23 | [Pd(allyl)( <b>L5b</b> ) <sub>2</sub> ]BF <sub>4</sub>                 | 2 | 82 | 66 ( <i>R</i> ) |

[a] All reactions were carried out with 1 mol% of [Pd(allyl)Cl]<sub>2</sub> in toluene at room temperature for 24 h (BSA, Zn(OAc)<sub>2</sub>). [b] The conversion of substrate **11** and enantiomeric excess of **13** were determined by HPLC (Kromasil 5-CelluCoat, C<sub>6</sub>H<sub>14</sub>/*i*PrOH = 95/5, 0.4 mL/min, 254 nm, *t*(*R*) = 14.3 min, *t*(*S*) = 16.7 min). [c] The absolute configuration was assigned by comparison of the HPLC retention times reported in the literature.<sup>[24]</sup>

**Table S7.** Pd-catalyzed allylic alkylation of **11** with **14**.<sup>[a]</sup>

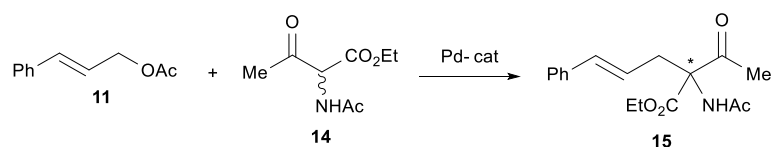

| Entry | Compound                                               | L/Pd | Conversion [%] | <i>Ee</i> [%] <sup>[b,c]</sup> |
|-------|--------------------------------------------------------|------|----------------|--------------------------------|
| 1     | <b>L1a</b>                                             | 1    | 100            | 76 ( <i>R</i> )                |
| 2     | <b>L1a</b>                                             | 2    | 100            | 72 ( <i>R</i> )                |
| 3     | [Pd(allyl)( <b>L1a</b> )]BF <sub>4</sub>               | 1    | 100            | 76 ( <i>R</i> )                |
| 4     | <b>L1b</b>                                             | 1    | 100            | 73 ( <i>S</i> )                |
| 5     | <b>L1b</b>                                             | 2    | 100            | 67 ( <i>S</i> )                |
| 6     | <b>L2a</b>                                             | 1    | 100            | 27 ( <i>S</i> )                |
| 7     | <b>L2a</b>                                             | 2    | 100            | 27 ( <i>S</i> )                |
| 8     | <b>L2b</b>                                             | 1    | 100            | 22 ( <i>R</i> )                |
| 9     | <b>L2b</b>                                             | 2    | 100            | 22 ( <i>R</i> )                |
| 10    | <b>L3a</b>                                             | 1    | 100            | 64 ( <i>R</i> )                |
| 11    | <b>L3a</b>                                             | 2    | 100            | 61 ( <i>R</i> )                |
| 12    | [Pd(allyl)( <b>L3a</b> ) <sub>2</sub> ]BF <sub>4</sub> | 2    | 100            | 60 ( <i>R</i> )                |
| 13    | <b>L3b</b>                                             | 1    | 100            | 72 ( <i>S</i> )                |
| 14    | <b>L3b</b>                                             | 2    | 100            | 69 ( <i>S</i> )                |
| 15    | <b>L4</b>                                              | 1    | 100            | 62 ( <i>R</i> )                |
| 16    | <b>L4</b>                                              | 2    | 100            | 54 ( <i>R</i> )                |
| 17    | [Pd(allyl)( <b>L4</b> ) <sub>2</sub> ]BF <sub>4</sub>  | 2    | 100            | 68 ( <i>R</i> )                |
| 18    | <b>L5a</b>                                             | 1    | 95             | 51 ( <i>R</i> )                |
| 19    | <b>L5a</b>                                             | 2    | 100            | 60 ( <i>R</i> )                |

## CATALYTIC RESULTS

|    |                                                          |   |     |                 |
|----|----------------------------------------------------------|---|-----|-----------------|
| 20 | $[\text{Pd}(\text{allyl})(\text{L5a})_2](\text{BF}_4)_2$ | 1 | 100 | 58 ( <i>R</i> ) |
| 21 | <b>L5b</b>                                               | 1 | 100 | 64 ( <i>S</i> ) |
| 22 | <b>L5b</b>                                               | 2 | 100 | 55 ( <i>S</i> ) |
| 23 | $[\text{Pd}(\text{allyl})(\text{L5b})_2]\text{BF}_4$     | 2 | 100 | 66 ( <i>S</i> ) |

[a] All reactions were carried out with 1 mol% of  $[\text{Pd}(\text{allyl})\text{Cl}]_2$  in toluene at room temperature for 24 h (BSA, KOAc). [b] The conversion of substrate **11** and enantiomeric excess of **15** were determined by HPLC (Daicel Chiralcel OD-H,  $\text{C}_6\text{H}_{14}/i\text{PrOH} = 85/15$ , 0.8 mL/min, 254 nm,  $t(\text{S}) = 9.8$  min,  $t(\text{R}) = 10.7$  min). [c] The absolute configuration was assigned by comparison of the HPLC retention times reported in the literature.<sup>[36]</sup>

**Table S8.** Pd-catalyzed allylic alkylation of **11** with **16**.<sup>[a]</sup>

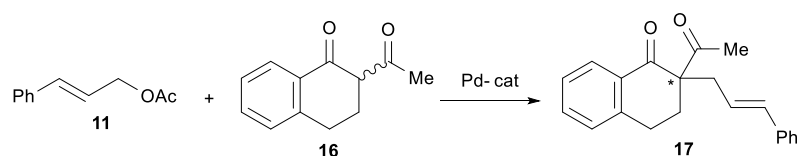

| Entry | Compound                                           | L/Pd | Conversion [%] | Ee [%] <sup>[b,c]</sup> |
|-------|----------------------------------------------------|------|----------------|-------------------------|
| 1     | <b>L1a</b>                                         | 1    | 100            | 5 ( <i>S</i> )          |
| 2     | <b>L1a</b>                                         | 2    | 100            | 6 ( <i>S</i> )          |
| 3     | $[\text{Pd}(\text{allyl})(\text{L1a})]\text{BF}_4$ | 1    | 100            | 7 ( <i>S</i> )          |
| 4     | <b>L1b</b>                                         | 1    | 46             | 42 ( <i>R</i> )         |
| 5     | <b>L1b</b>                                         | 2    | 100            | 13 ( <i>R</i> )         |
| 6     | <b>L2a</b>                                         | 1    | 100            | 11 ( <i>S</i> )         |
| 7     | <b>L2a</b>                                         | 2    | 100            | 12 ( <i>S</i> )         |
| 8     | <b>L2b</b>                                         | 1    | 100            | 24 ( <i>R</i> )         |
| 9     | <b>L2b</b>                                         | 2    | 100            | 22 ( <i>R</i> )         |
| 10    | <b>L3a</b>                                         | 1    | 70             | 66 ( <i>S</i> )         |
| 11    | <b>L3a</b>                                         | 2    | 100            | 61 ( <i>S</i> )         |
| 12    | <b>L3b</b>                                         | 1    | 34             | 3 ( <i>R</i> )          |
| 13    | <b>L3b</b>                                         | 2    | 100            | 27 ( <i>R</i> )         |
| 14    | <b>L4</b>                                          | 1    | 87             | 46 ( <i>S</i> )         |
| 15    | <b>L4</b>                                          | 2    | 100            | 30 ( <i>S</i> )         |
| 16    | <b>L5a</b>                                         | 1    | 66             | 49 ( <i>S</i> )         |
| 17    | <b>L5a</b>                                         | 2    | 100            | 45 ( <i>S</i> )         |
| 18    | <b>L5b</b>                                         | 1    | 60             | 40 ( <i>R</i> )         |
| 19    | <b>L5b</b>                                         | 2    | 100            | 32 ( <i>R</i> )         |

## CATALYTIC RESULTS

[a] All reactions were carried out with 1 mol% of  $[\text{Pd}(\text{allyl})\text{Cl}]_2$  in toluene at room temperature for 24 h (BSA,  $\text{Zn}(\text{OAc})_2$ ). [b] The conversion of substrate **11** and enantiomeric excess of **17** were determined by HPLC (Kromasil 5-CelluCoat,  $\text{C}_6\text{H}_{14}/i\text{PrOH} = 95/5$ , 0.8 mL/min, 254 nm,  $t(S) = 11.2$  min,  $t(R) = 13.3$  min). [c] The absolute configuration was assigned by comparison of the HPLC retention times reported in the literature.<sup>[37]</sup>

**Table S9.** Pd-catalyzed allylic amination of **18** with aniline.<sup>[a]</sup>

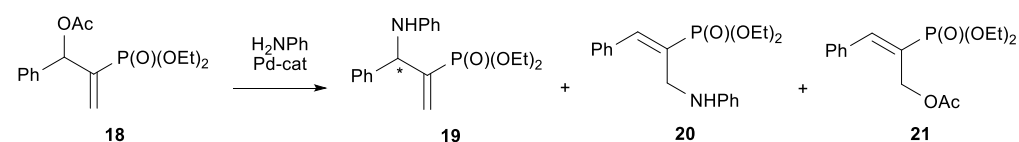

| Entry | Compound                                                 | L/Pd | Conversion [%] | 19/20/21 <sup>[b]</sup> | <i>Ee</i> [%] <sup>[c,d]</sup> |
|-------|----------------------------------------------------------|------|----------------|-------------------------|--------------------------------|
| 1     | <b>L1a</b>                                               | 1    | 100            | 15/85/0                 | 22 ( <i>R</i> )                |
| 2     | $[\text{Pd}(\text{allyl})(\text{L1a})]\text{BF}_4$       | 1    | 100            | 17/83/0                 | 18 ( <i>R</i> )                |
| 3     | <b>L1b</b>                                               | 1    | 100            | 11/89/0                 | 2 ( <i>S</i> )                 |
| 4     | <b>L2a</b>                                               | 1    | 100            | 5/95/0                  | n. d.                          |
| 5     | <b>L2b</b>                                               | 1    | 100            | 0/100/0                 | -                              |
| 6     | <b>L3a</b>                                               | 1    | 100            | 8/92/0                  | 25 ( <i>R</i> )                |
| 7     | <b>L3a</b>                                               | 2    | 100            | 57/43/0                 | 71 ( <i>R</i> )                |
| 8     | $[\text{Pd}(\text{allyl})(\text{L3a})_2]\text{BF}_4$     | 2    | 100            | 51/49/0                 | 66 ( <i>R</i> )                |
| 9     | <b>L3b</b>                                               | 1    | 100            | 6/94/0                  | n. d.                          |
| 10    | <b>L3b</b>                                               | 2    | 100            | 65/35/0                 | 38 ( <i>S</i> )                |
| 11    | <b>L4</b>                                                | 1    | 95             | 18/65/17                | 10 ( <i>R</i> )                |
| 12    | <b>L4</b>                                                | 2    | 100            | 70/30/0                 | 64 ( <i>R</i> )                |
| 13    | $[\text{Pd}(\text{allyl})(\text{L4})_2]\text{BF}_4$      | 2    | 100            | 32/34/34                | 63 ( <i>R</i> )                |
| 14    | <b>L5a</b>                                               | 1    | 100            | 6/94/0                  | 28 ( <i>R</i> )                |
| 15    | <b>L5a</b>                                               | 1    | 100            | 62/38/0                 | 66 ( <i>R</i> )                |
| 16    | $[\text{Pd}(\text{allyl})(\text{L5a})_2](\text{BF}_4)_2$ | 2    | 100            | 28/72/0                 | 47 ( <i>R</i> )                |
| 17    | <b>L5b</b>                                               | 1    | 100            | 6/94/0                  | 6 ( <i>S</i> )                 |
| 18    | <b>L5b</b>                                               | 1    | 100            | 50/50/0                 | 3 ( <i>S</i> )                 |
| 19    | $[\text{Pd}(\text{allyl})(\text{L5b})_2]\text{BF}_4$     | 2    | 100            | 45/40/15                | 2 ( <i>S</i> )                 |

[a] All reactions were carried out with 1 mol% of  $[\text{Pd}(\text{allyl})\text{Cl}]_2$  in  $\text{CH}_2\text{Cl}_2$  at room temperature for 24 h ( $\text{K}_2\text{CO}_3$ ). [b] The conversion of substrate **18** and the ratio of **19/20/21** were determined by  $^{31}\text{P}$  NMR spectroscopy. [c] The enantiomeric excess of **19** were determined by HPLC (Daicel Chiralcel OD-H,  $\text{C}_6\text{H}_{14}/i\text{PrOH} = 9/1$ , 1.0 mL/min, 254 nm,  $t(S) = 5.9$  min,  $t(R) = 6.9$  min). [d] The absolute configuration was assigned by comparison of the HPLC retention times reported in the literature.<sup>[21]</sup>

## HPLC TRACES FOR THE Pd-CATALYZED ALLYLIC SUBSTITUTION

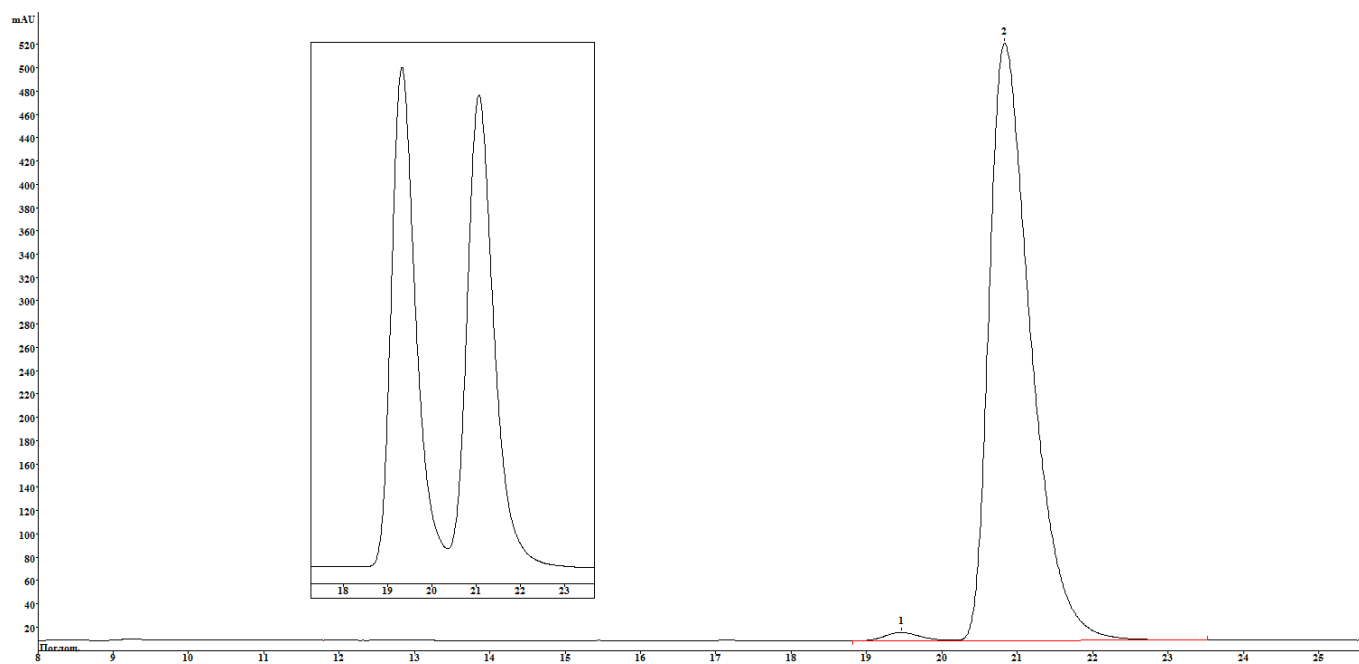

Chiral HPLC trace for the Pd-catalyzed asymmetric allylic alkylation of **9** with dimethyl malonate (entry 1 in Table 1) and for a racemic mixture of **10a** (in the frame).

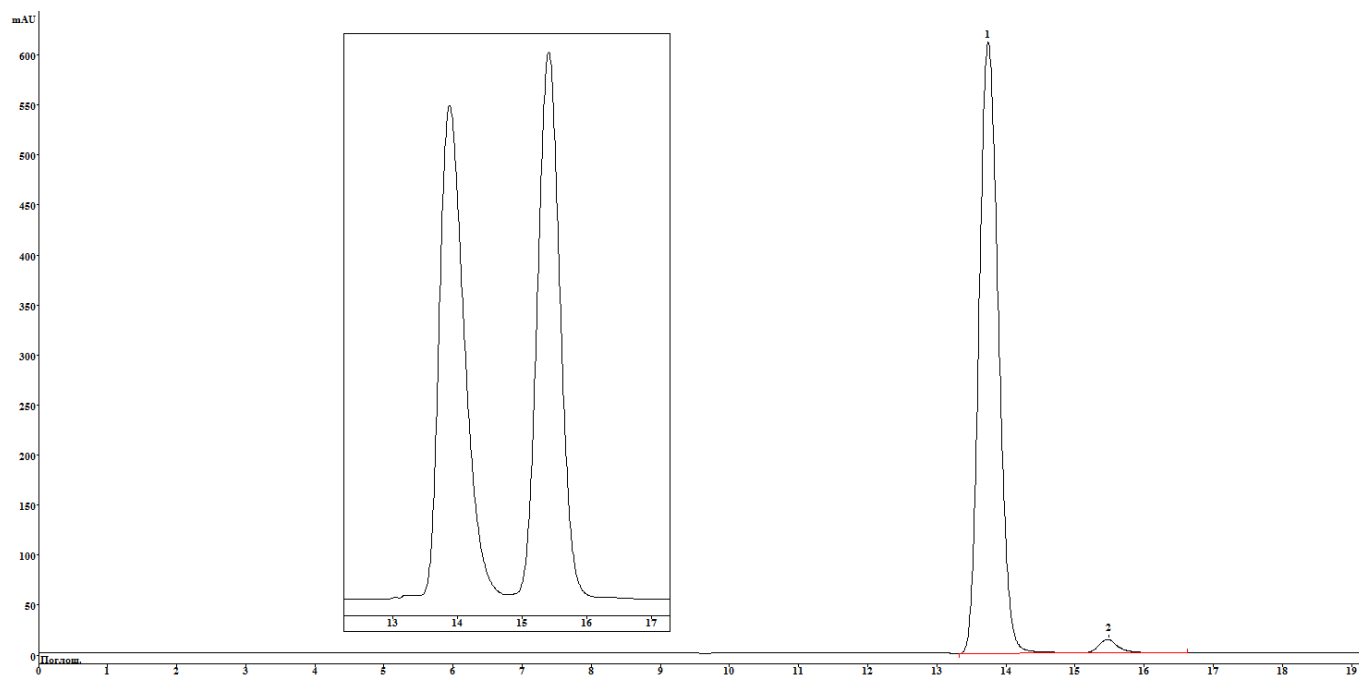

Chiral HPLC trace for the Pd-catalyzed asymmetric allylic amination of **9** with pyrrolidine (entry 6 in Table 2) and for a racemic mixture of **10b** (in the frame).



## HPLC TRACES FOR THE Pd-CATALYZED ALLYLIC SUBSTITUTION

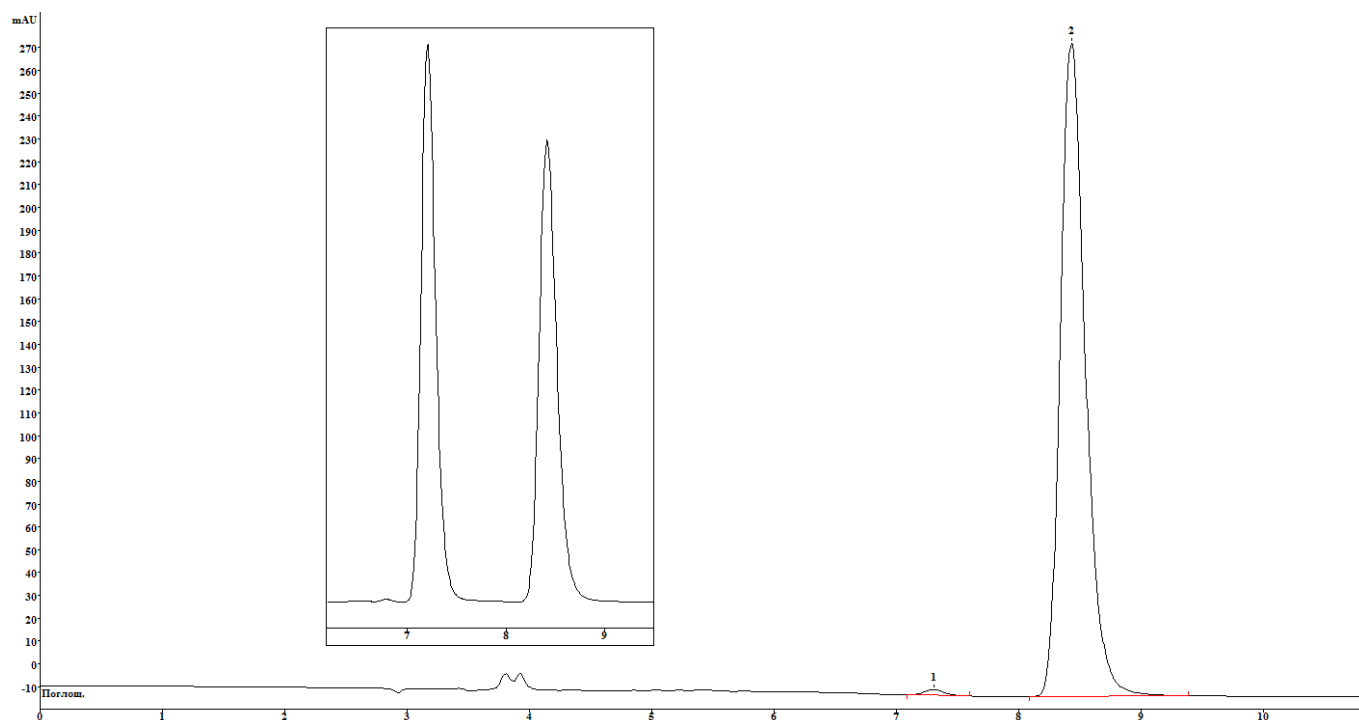

Chiral HPLC trace for the Pd-catalyzed asymmetric allylic amination of **9** with phthalimide (entry 5 in Table 2) and for a racemic mixture of **10c** (in the frame).

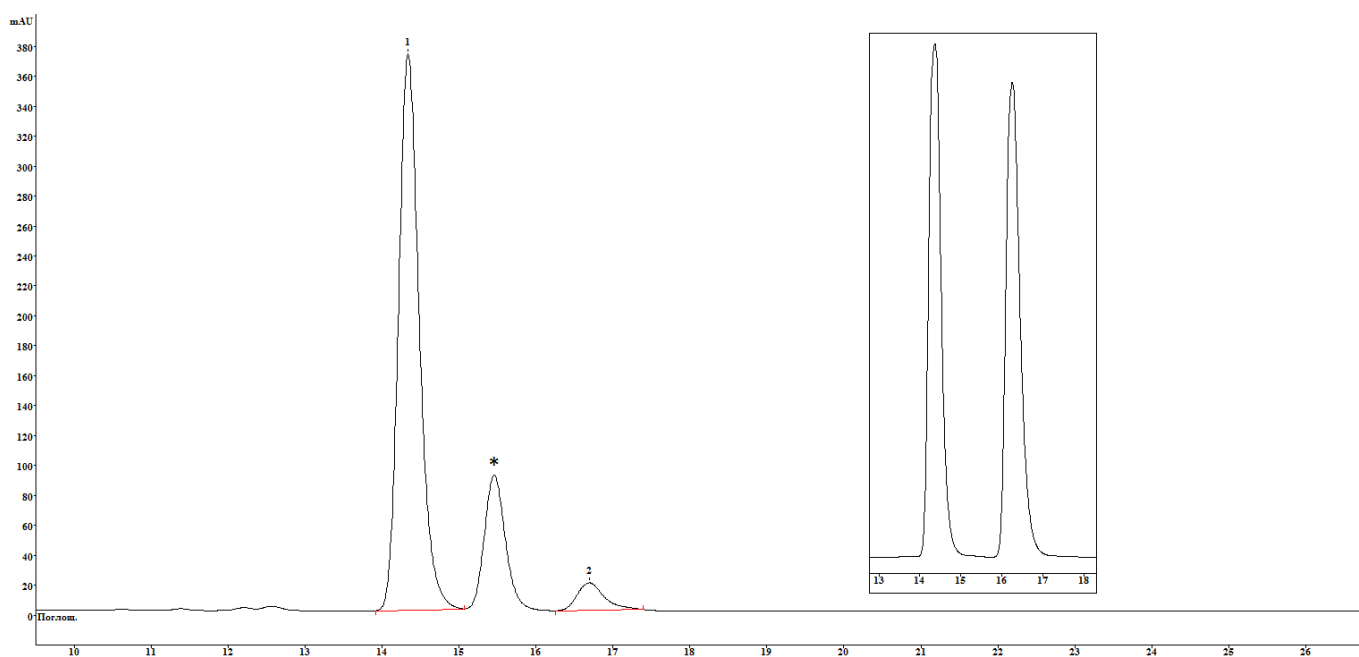

\* cinnamyl acetate **11**

Chiral HPLC trace for the Pd-catalyzed asymmetric allylic alkylation of cinnamyl acetate **11** with ethyl 2-oxocyclohexane-1-carboxylate **12** (entry 22 in Table 3) and for a racemic mixture of **13** (in the frame).

## HPLC TRACES FOR THE Pd-CATALYZED ALLYLIC SUBSTITUTION

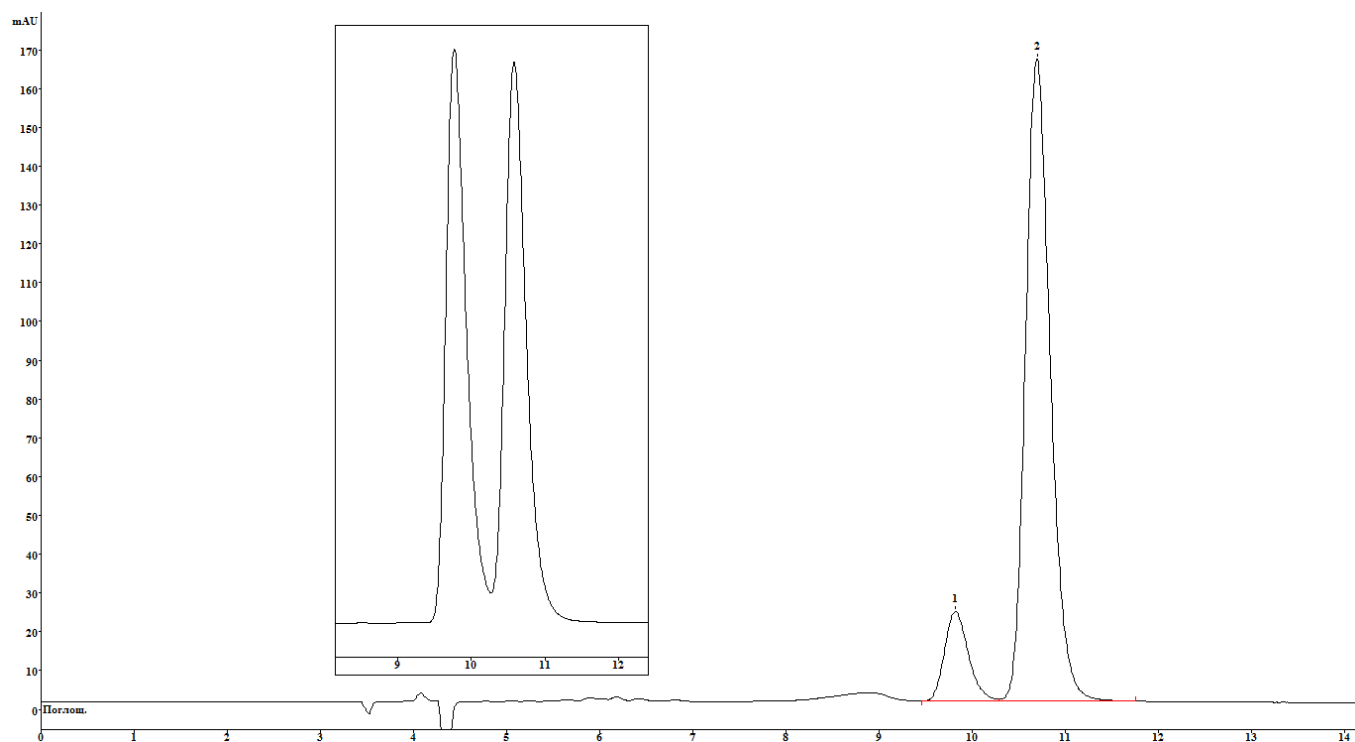

Chiral HPLC trace for the Pd-catalyzed asymmetric allylic alkylation of cinnamyl acetate **11** with ethyl 2-acetamido-3-oxobutanoate **14** (entry 1 in Table 4) and for a racemic mixture of **15** (in the frame).

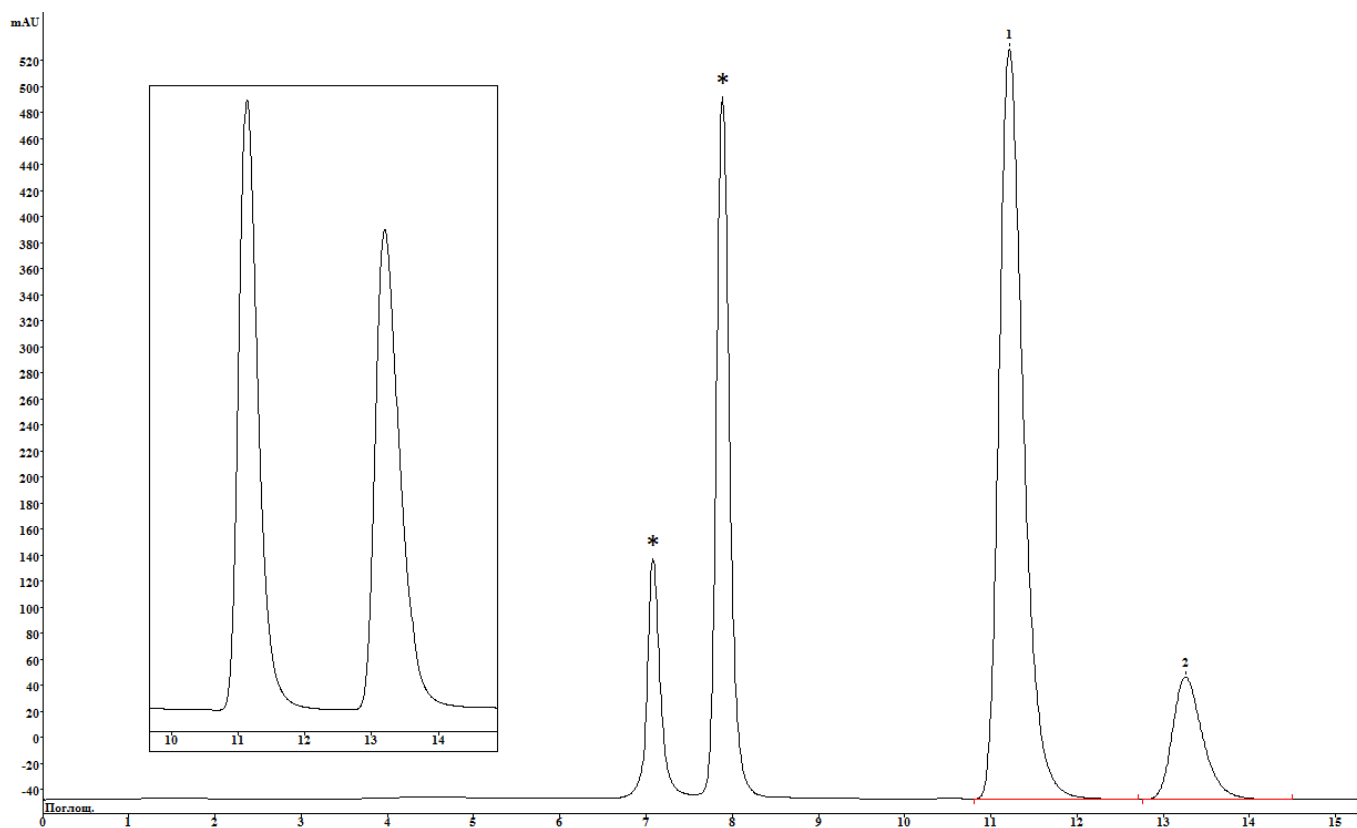

\* cinnamyl acetate **11**

Chiral HPLC trace for the Pd-catalyzed asymmetric allylic alkylation of cinnamyl acetate **11** with 2-acetyl-1-tetralone **16** (entry 10 in Table 5) and for a racemic mixture of **17** (in the frame).

## HPLC TRACES FOR THE Pd-CATALYZED ALLYLIC SUBSTITUTION

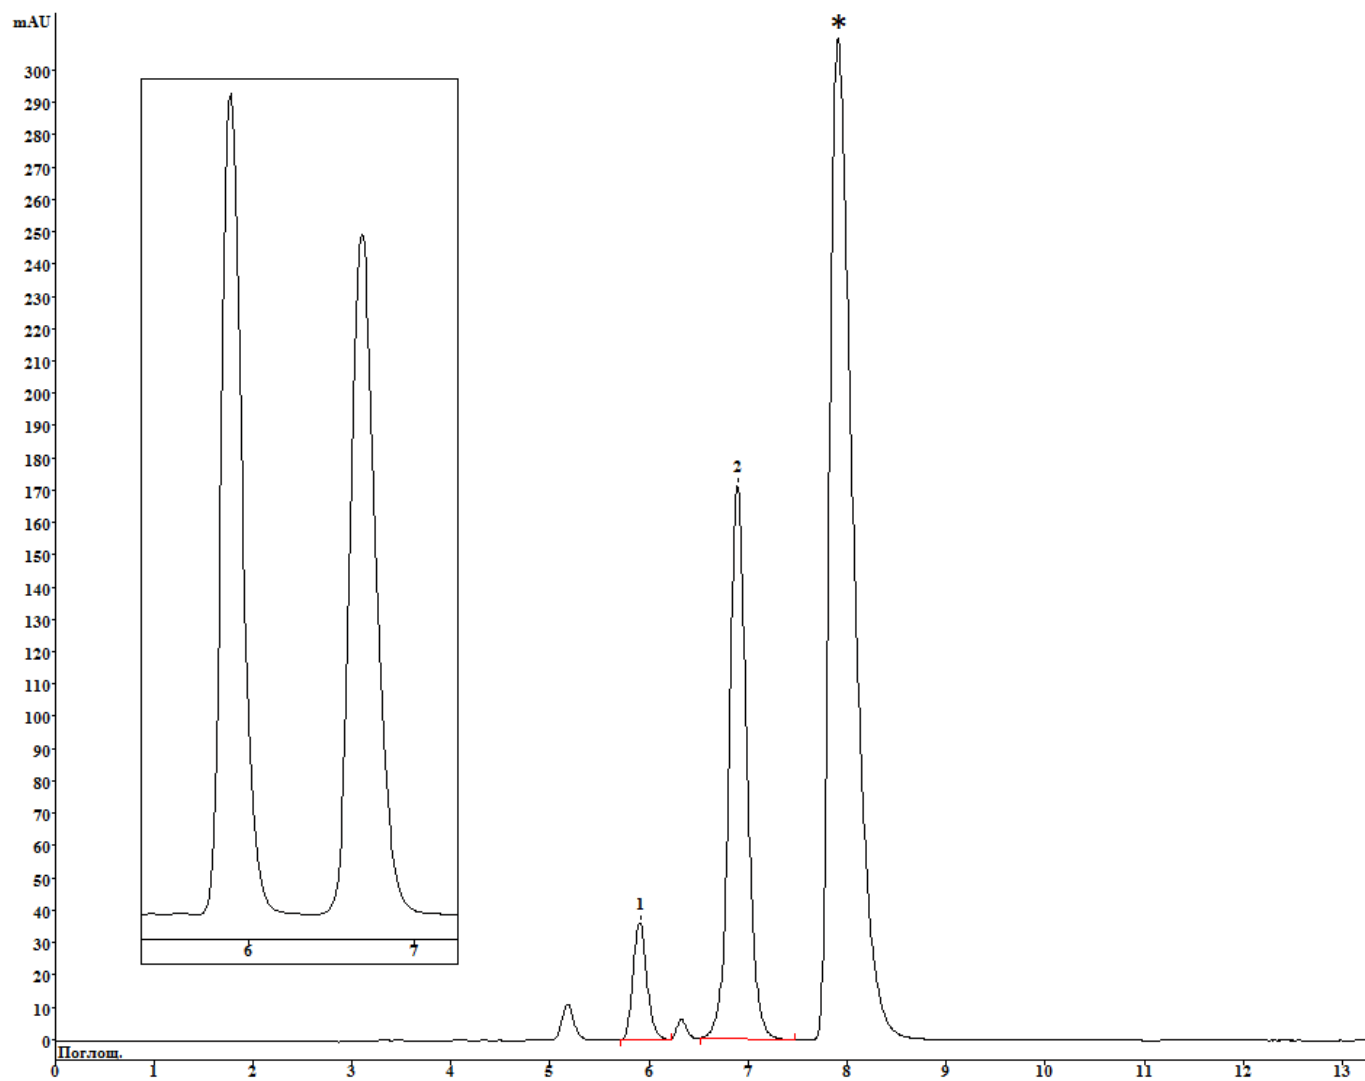

\* product **20**

Chiral HPLC trace for the Pd-catalyzed allylic amination of **18** with aniline (entry 7 in Table 6) and for a racemic mixture of **19** (in the frame).

# NMR AND MASS SPECTRA

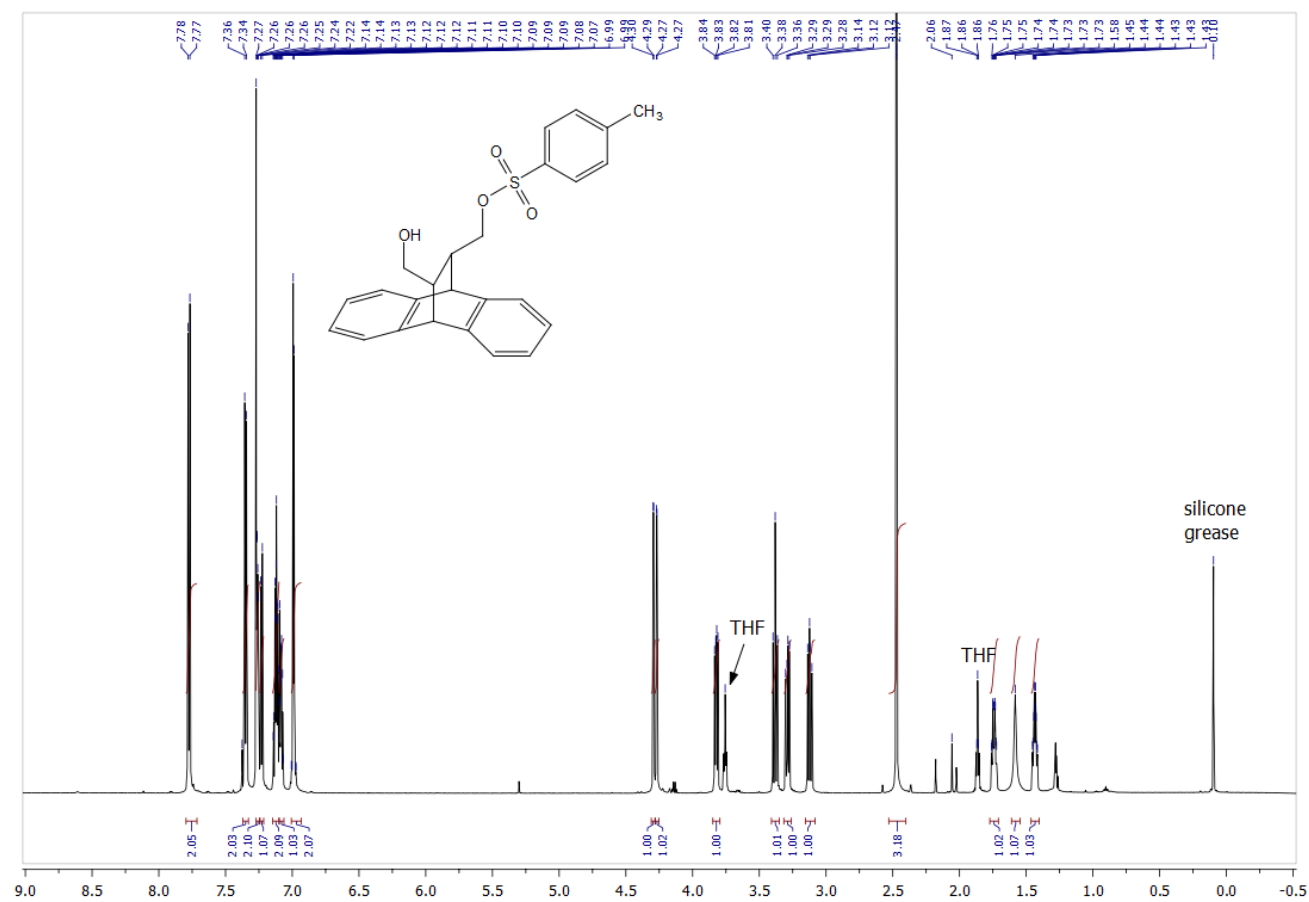

2,  $^1\text{H}$  (600.1 MHz,  $\text{CDCl}_3$ , 30 °C).

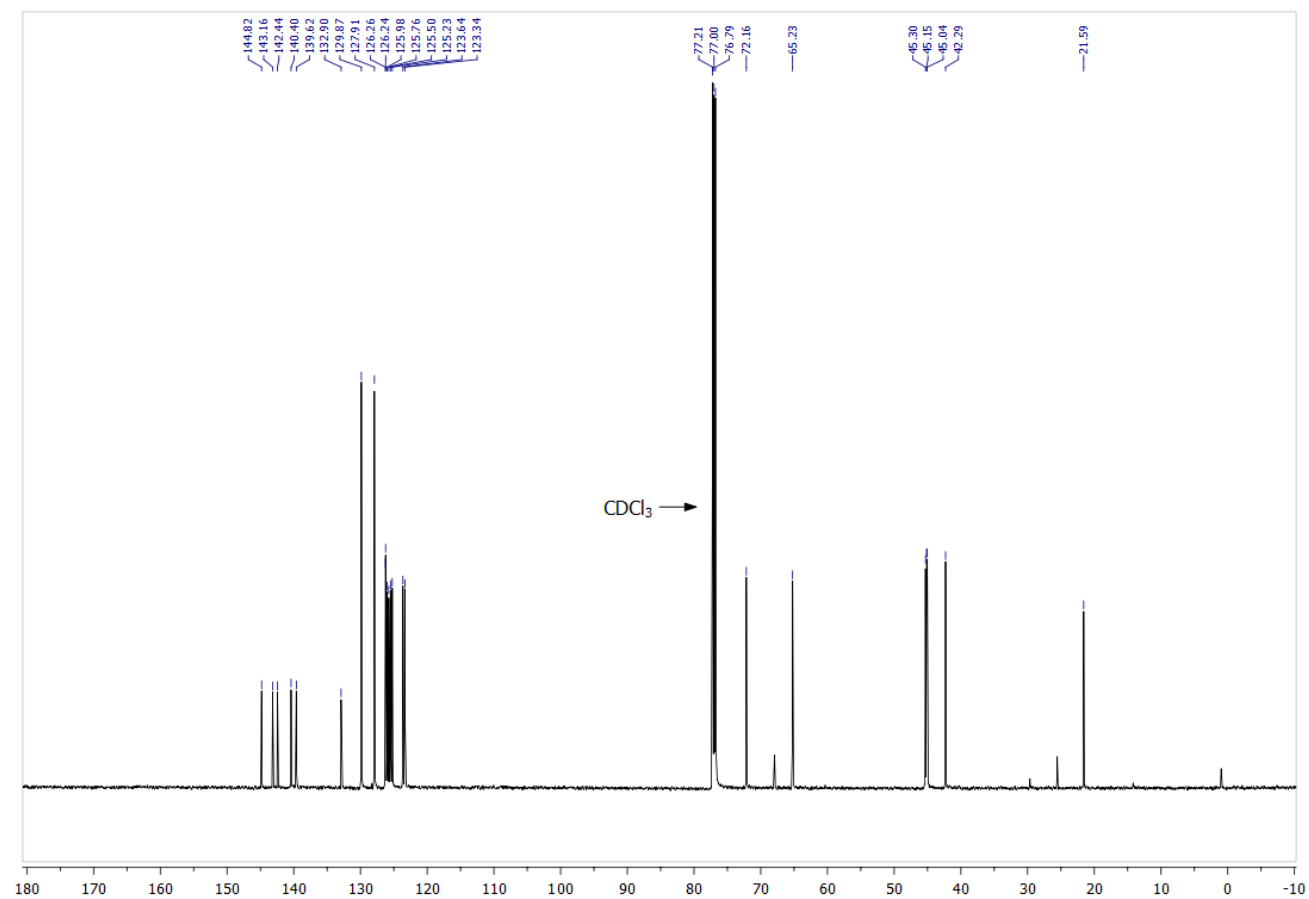

2,  $^{13}\text{C}\{^1\text{H}\}$  (150.9 MHz,  $\text{CDCl}_3$ , 30 °C).

# NMR AND MASS SPECTRA

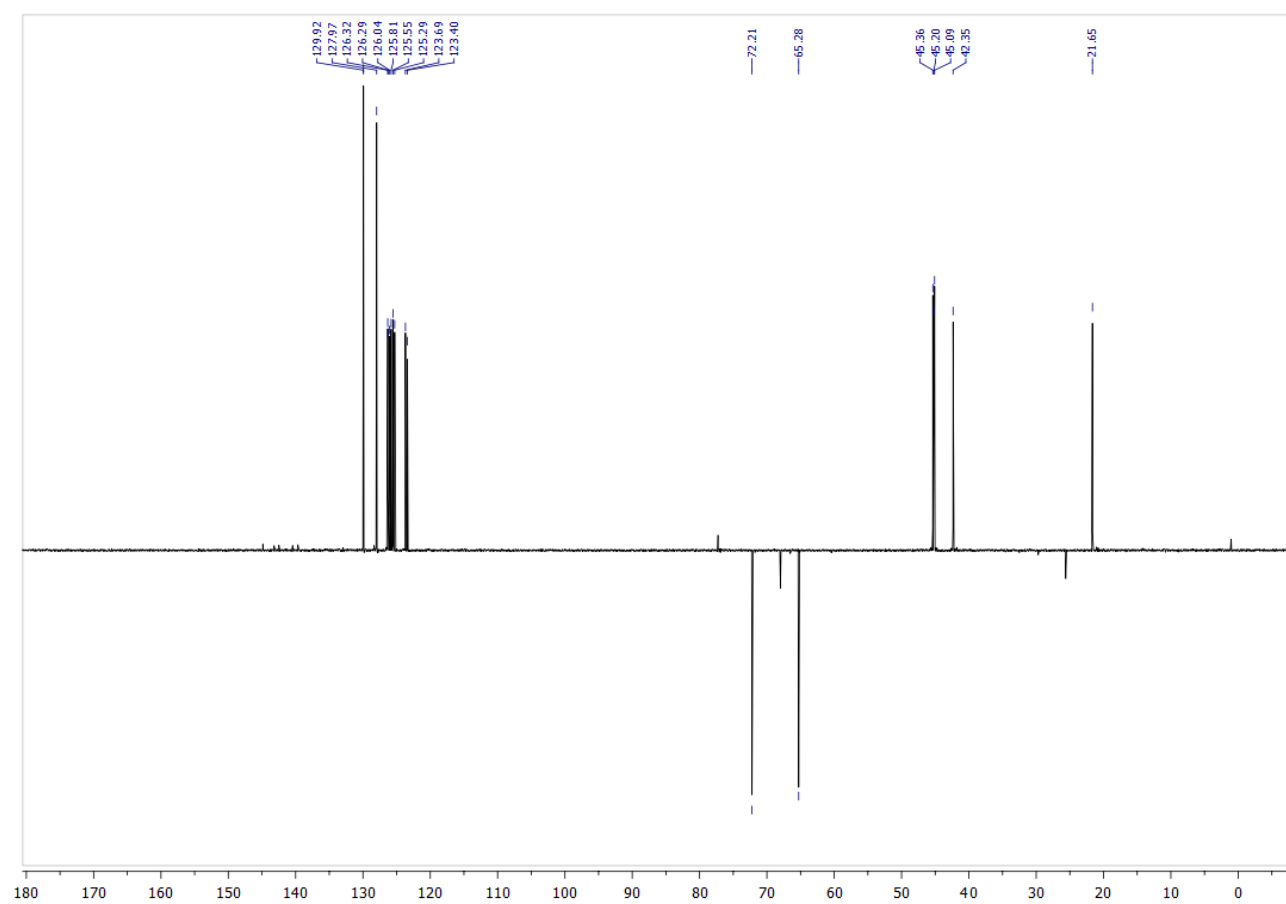

2,  $^{13}\text{C}\{^1\text{H}\}$  DEPT (150.9 MHz,  $\text{CDCl}_3$ , 30 °C).

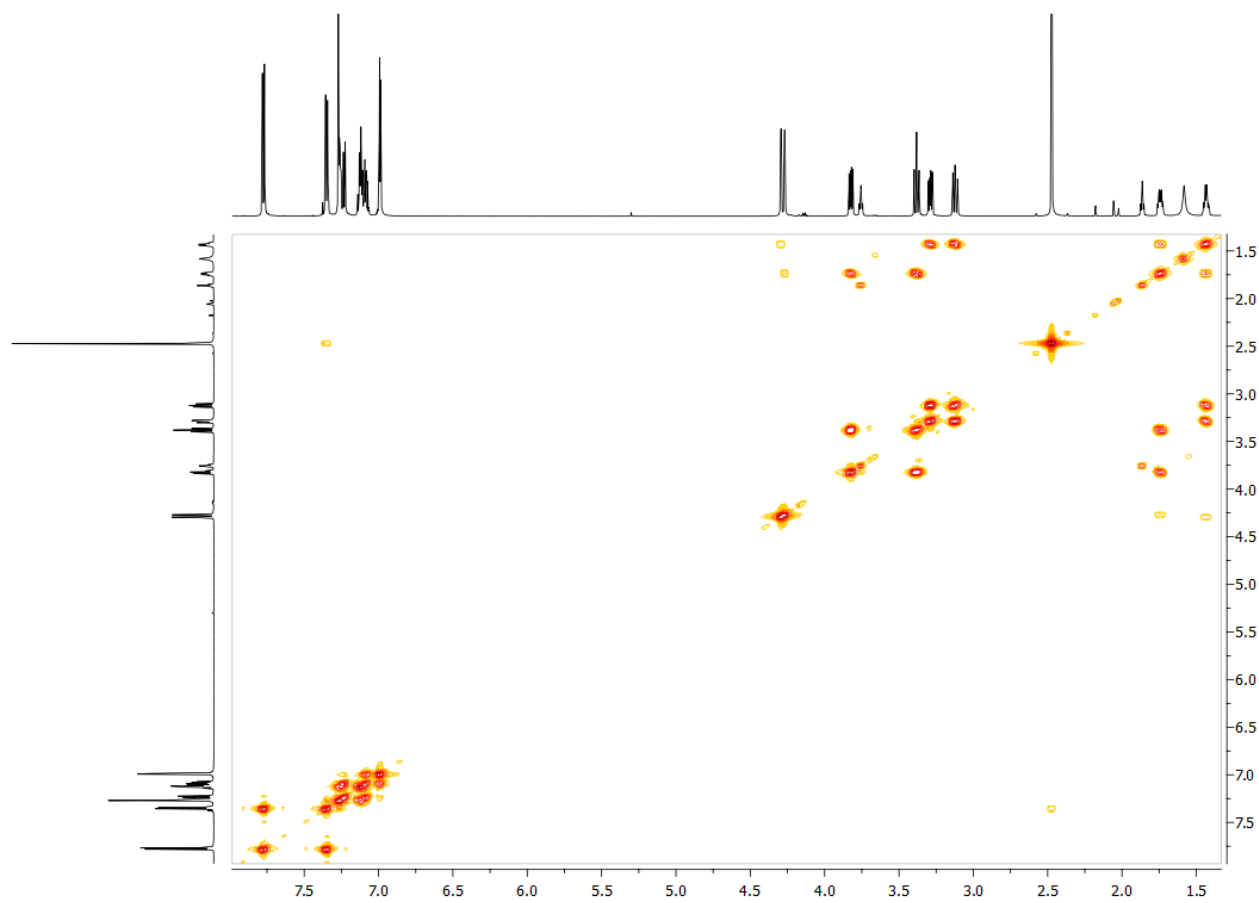

2,  $^1\text{H}\text{-}^1\text{H}$  COSY.

# NMR AND MASS SPECTRA

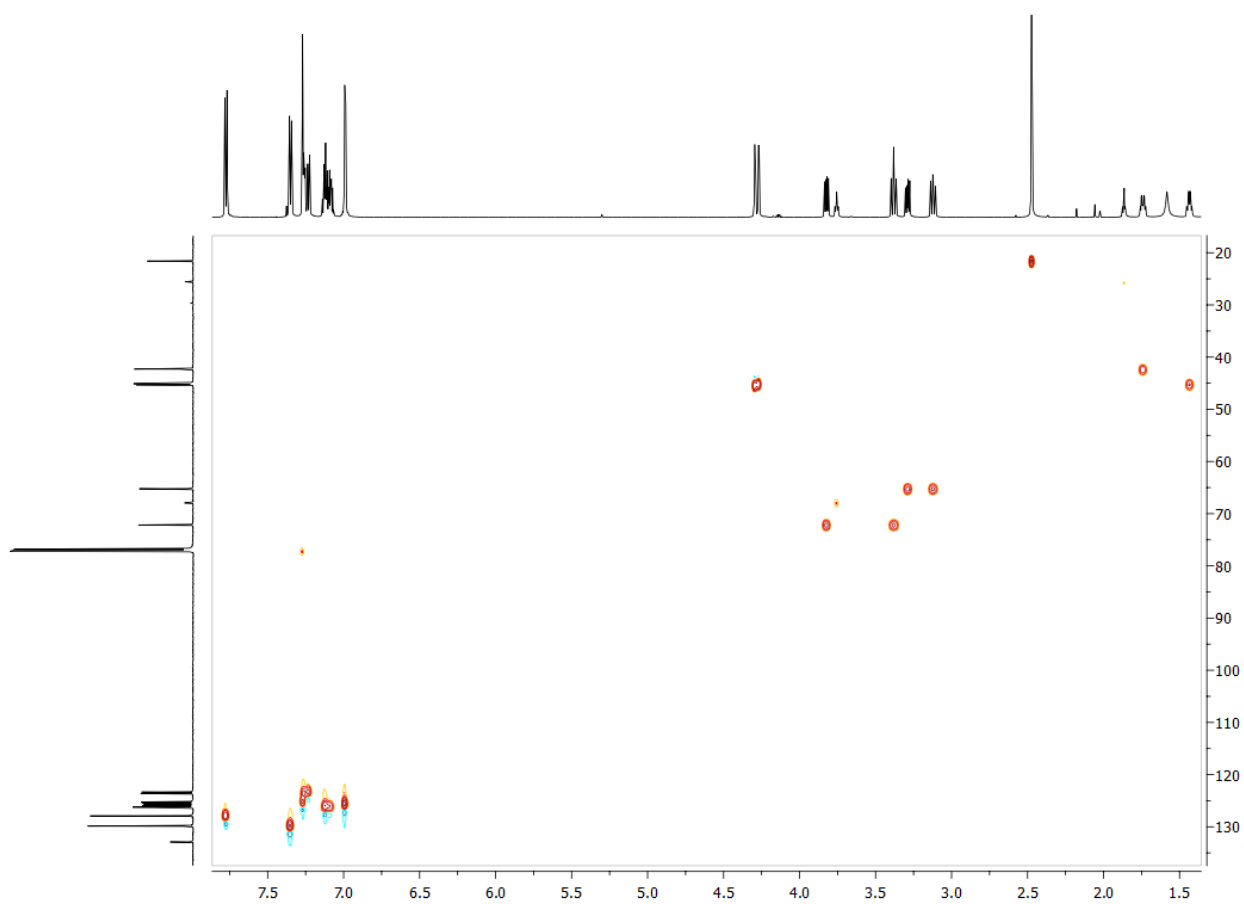

2,  $^1\text{H}$ - $^{13}\text{C}$  HSQC.

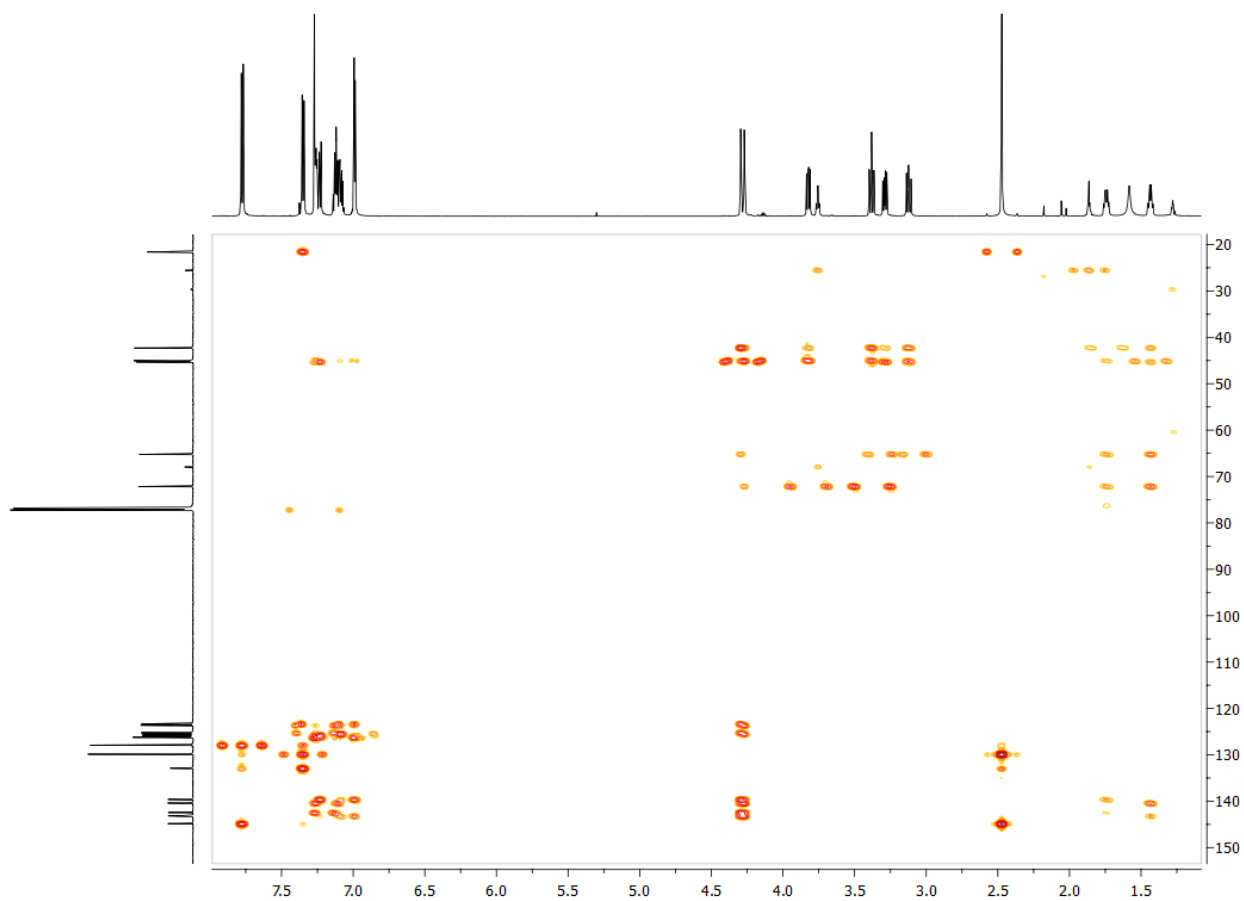

2,  $^1\text{H}$ - $^{13}\text{C}$  HMBC.

# NMR AND MASS SPECTRA

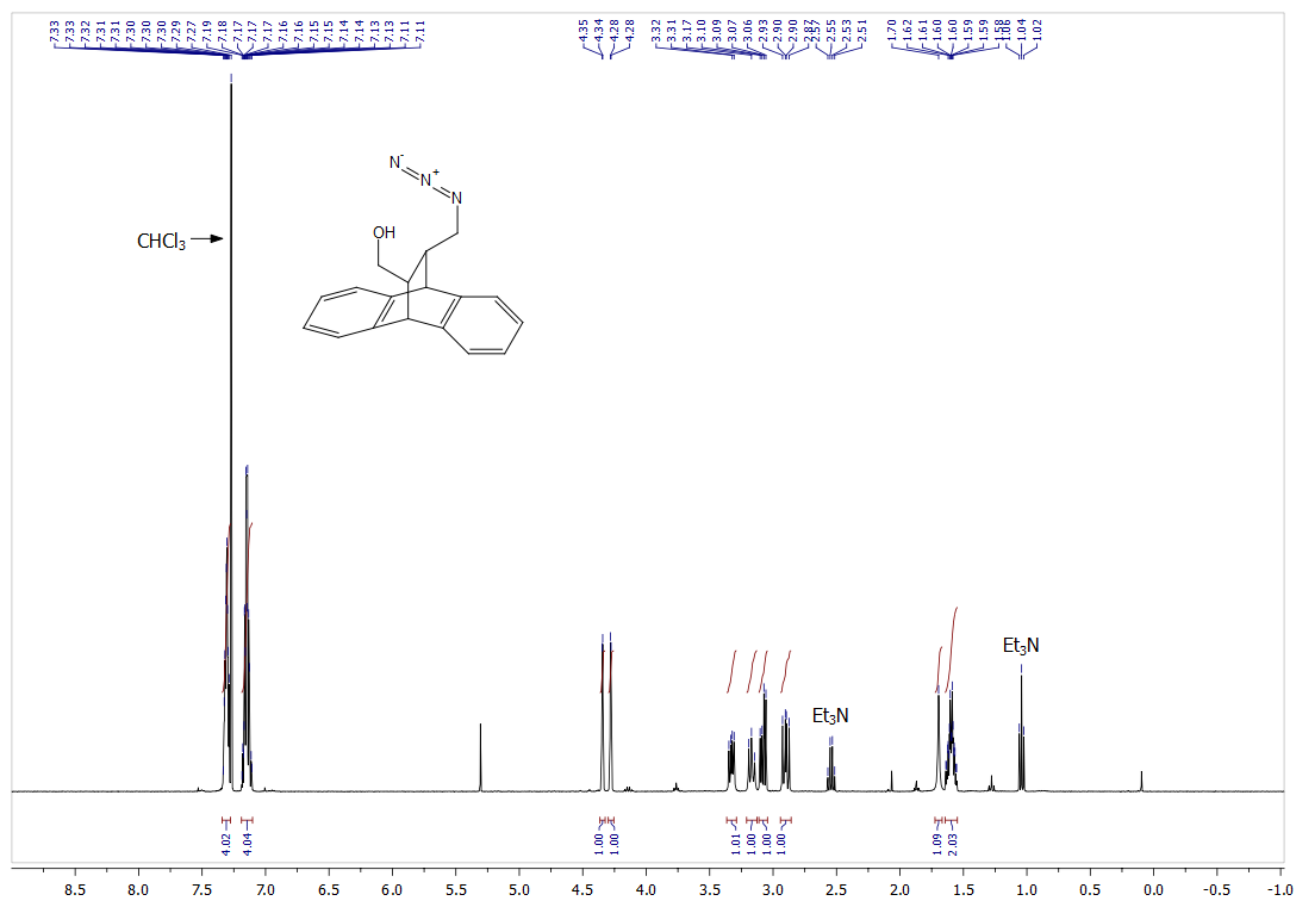

**3**,  $^1\text{H}$  (600.1 MHz,  $\text{CDCl}_3$ , 30 °C).

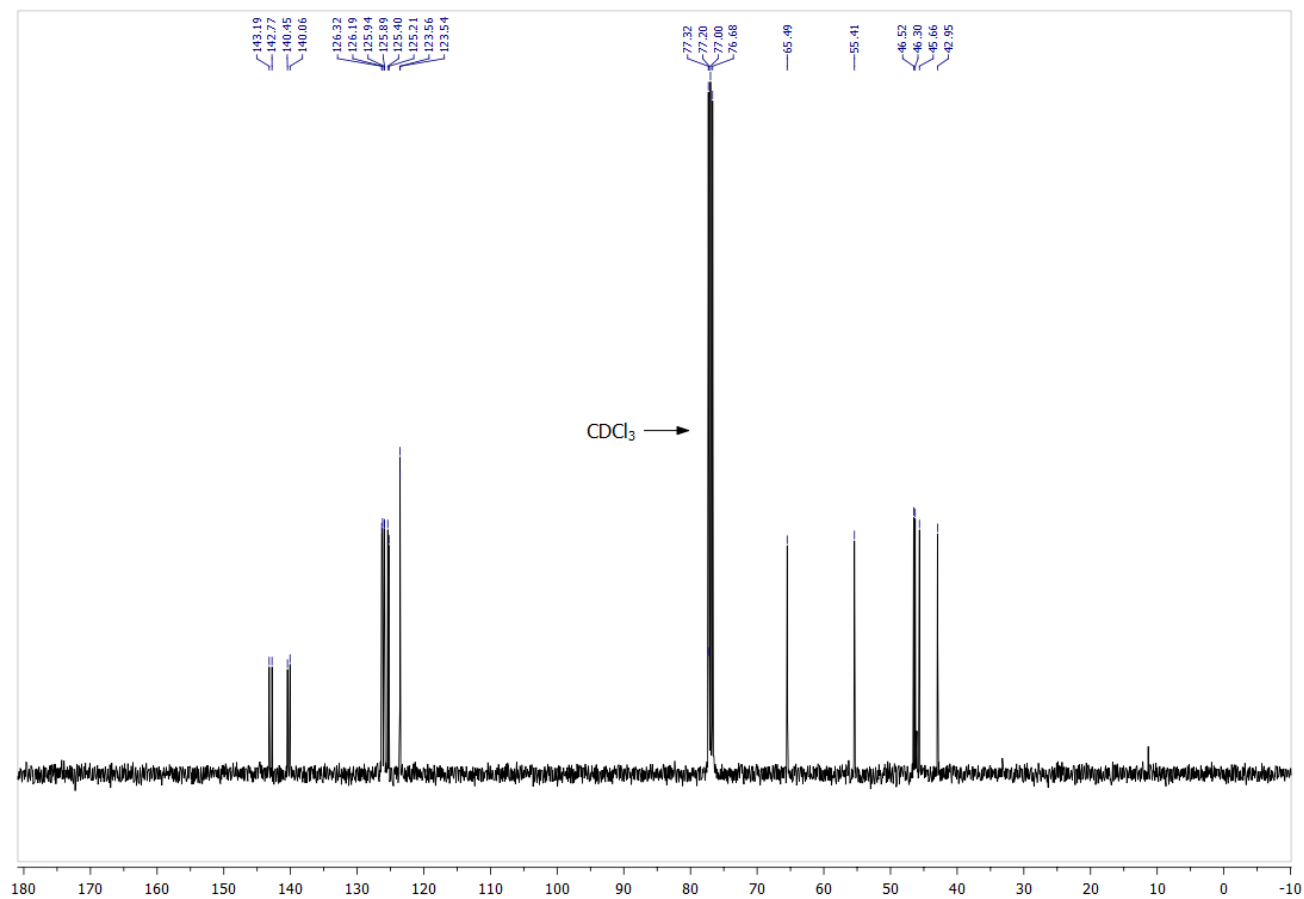

**3**,  $^{13}\text{C}\{^1\text{H}\}$  (150.9 MHz,  $\text{CDCl}_3$ , 30 °C).

## NMR AND MASS SPECTRA

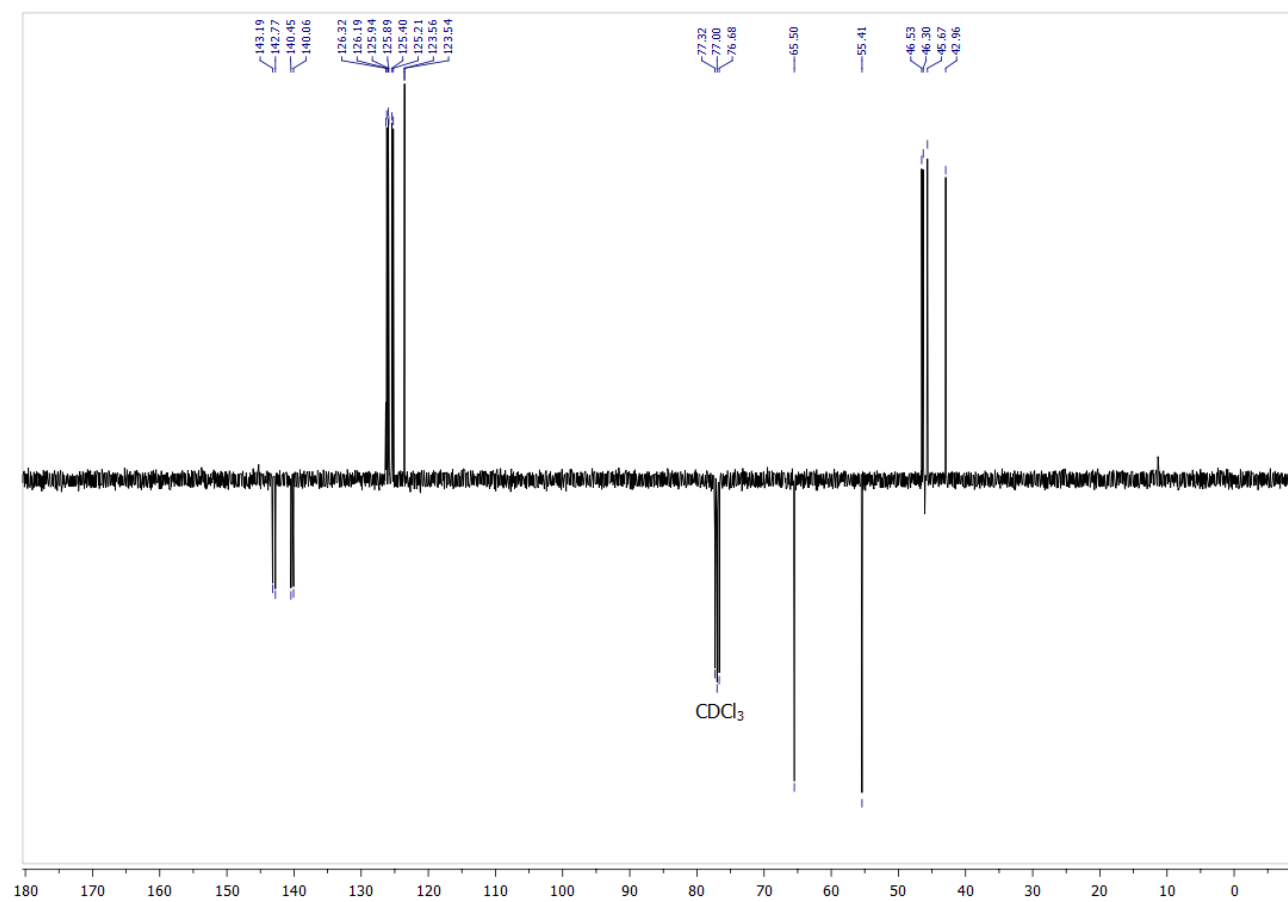

**3**,  $^{13}\text{C}\{^1\text{H}\}$  DEPT (150.9 MHz,  $\text{CDCl}_3$ , 30 °C).

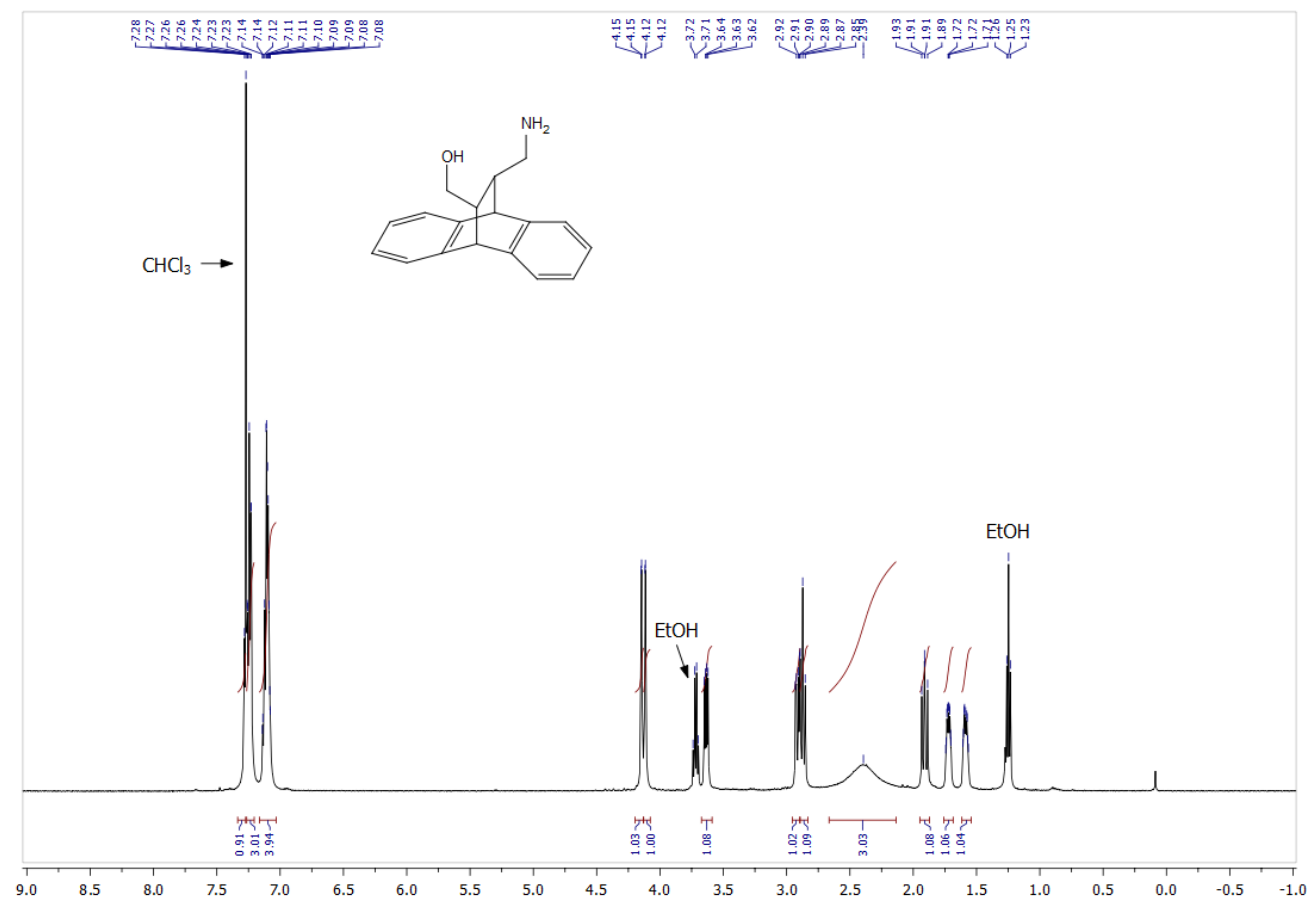

**4**,  $^1\text{H}$  (499.9 MHz,  $\text{CDCl}_3$ , ambient temperature).



## NMR AND MASS SPECTRA

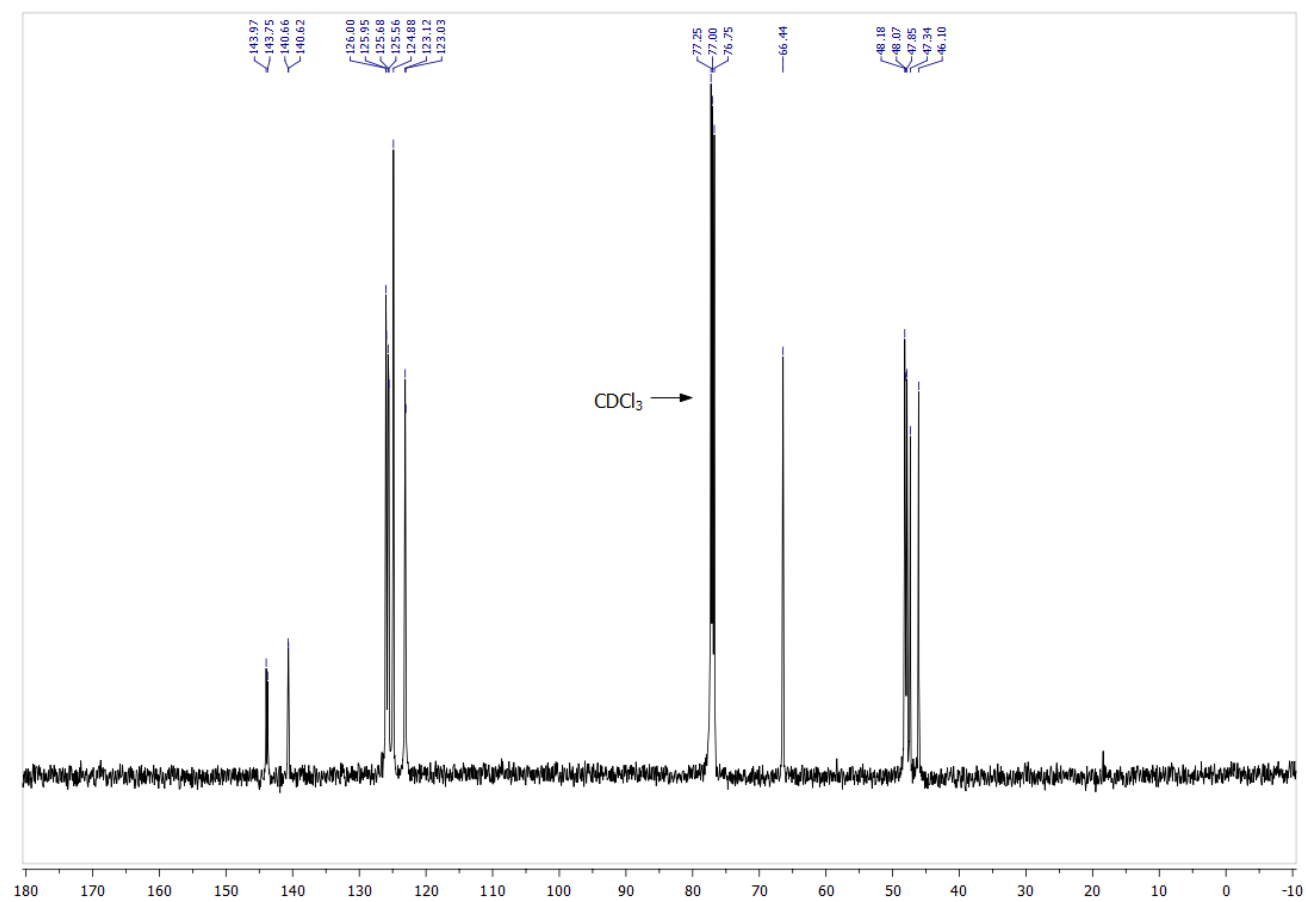

**4**,  $^{13}\text{C}\{^1\text{H}\}$  (125.7 MHz,  $\text{CDCl}_3$ , ambient temperature).

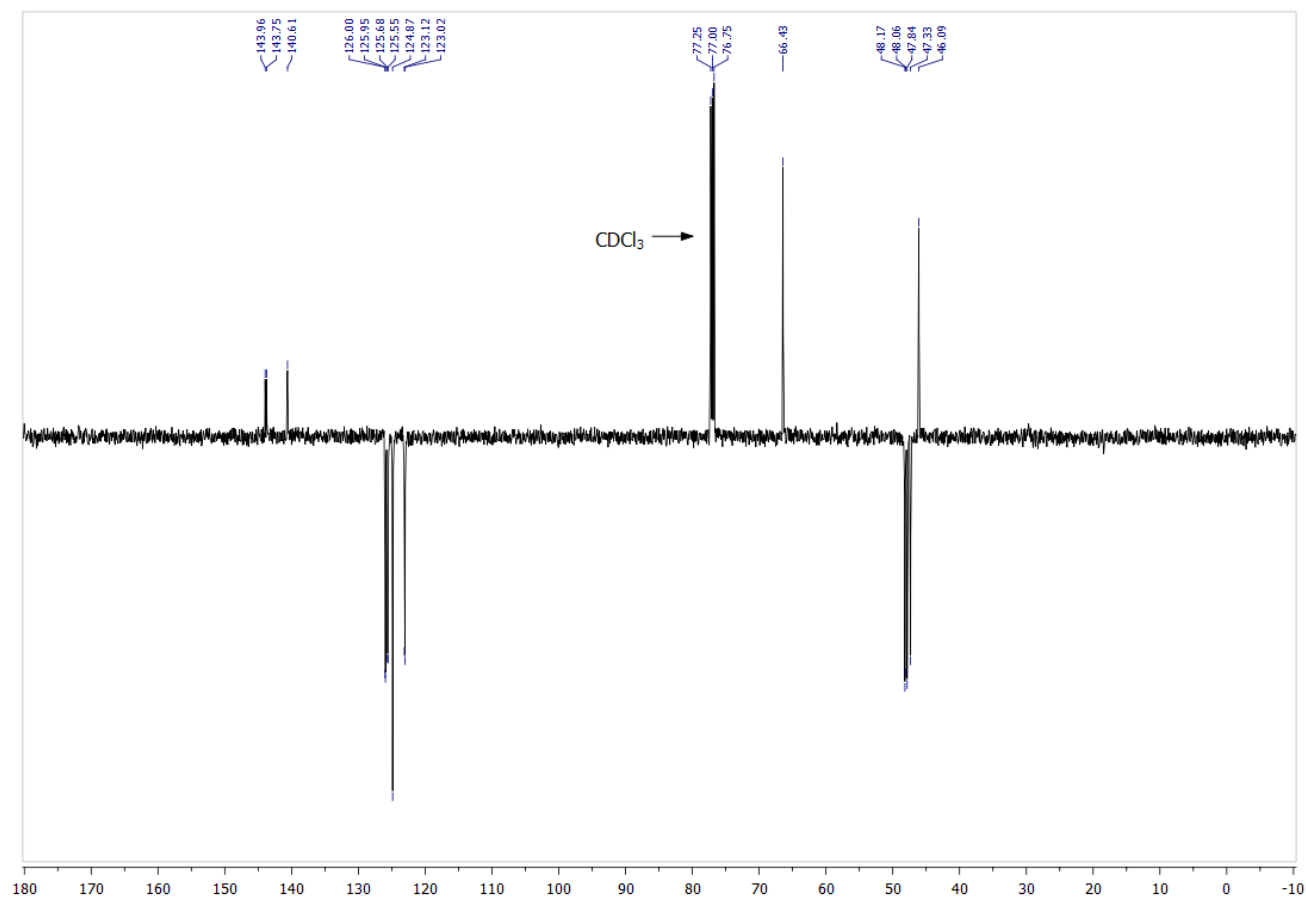

**4**,  $^{13}\text{C}\{^1\text{H}\}$  APT (125.7 MHz,  $\text{CDCl}_3$ , ambient temperature).

# NMR AND MASS SPECTRA

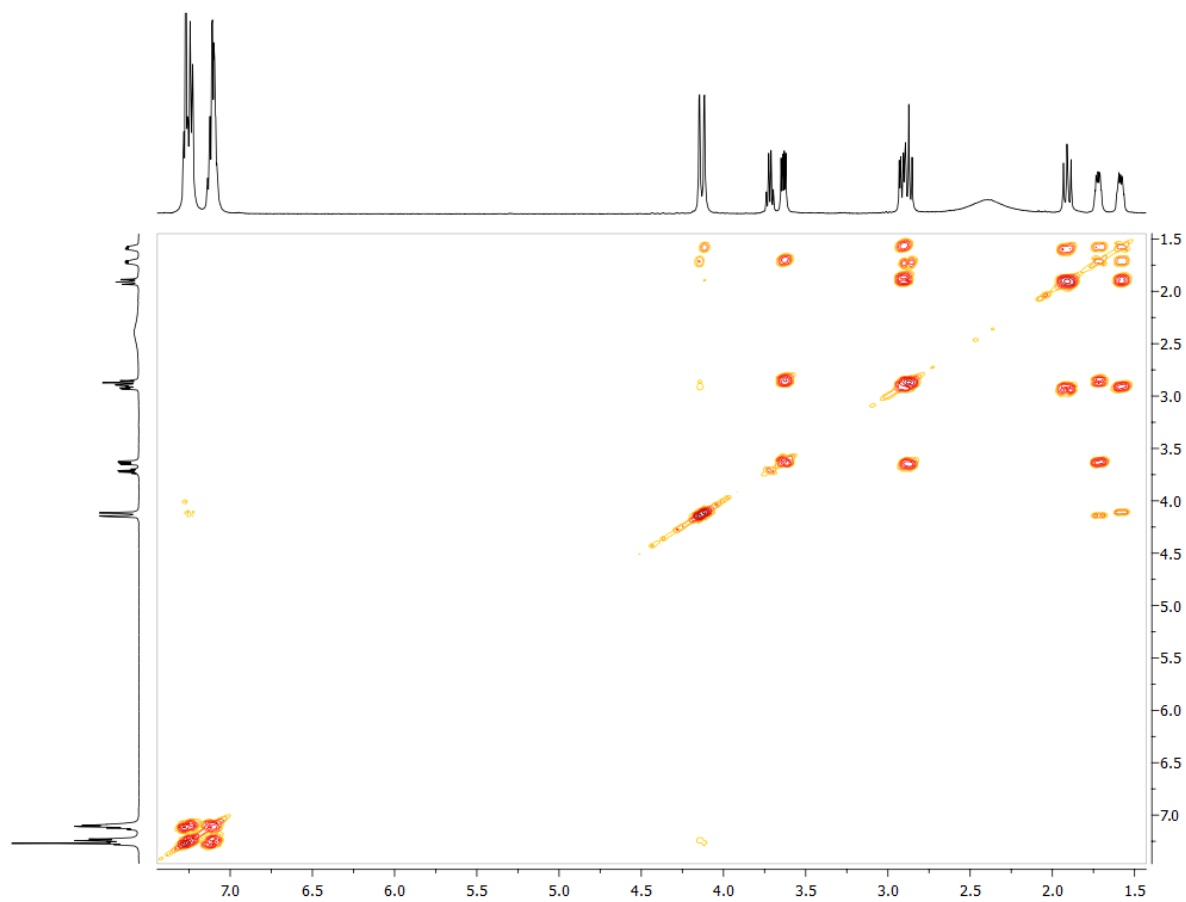

4,  $^1\text{H}$ - $^1\text{H}$  COSY.

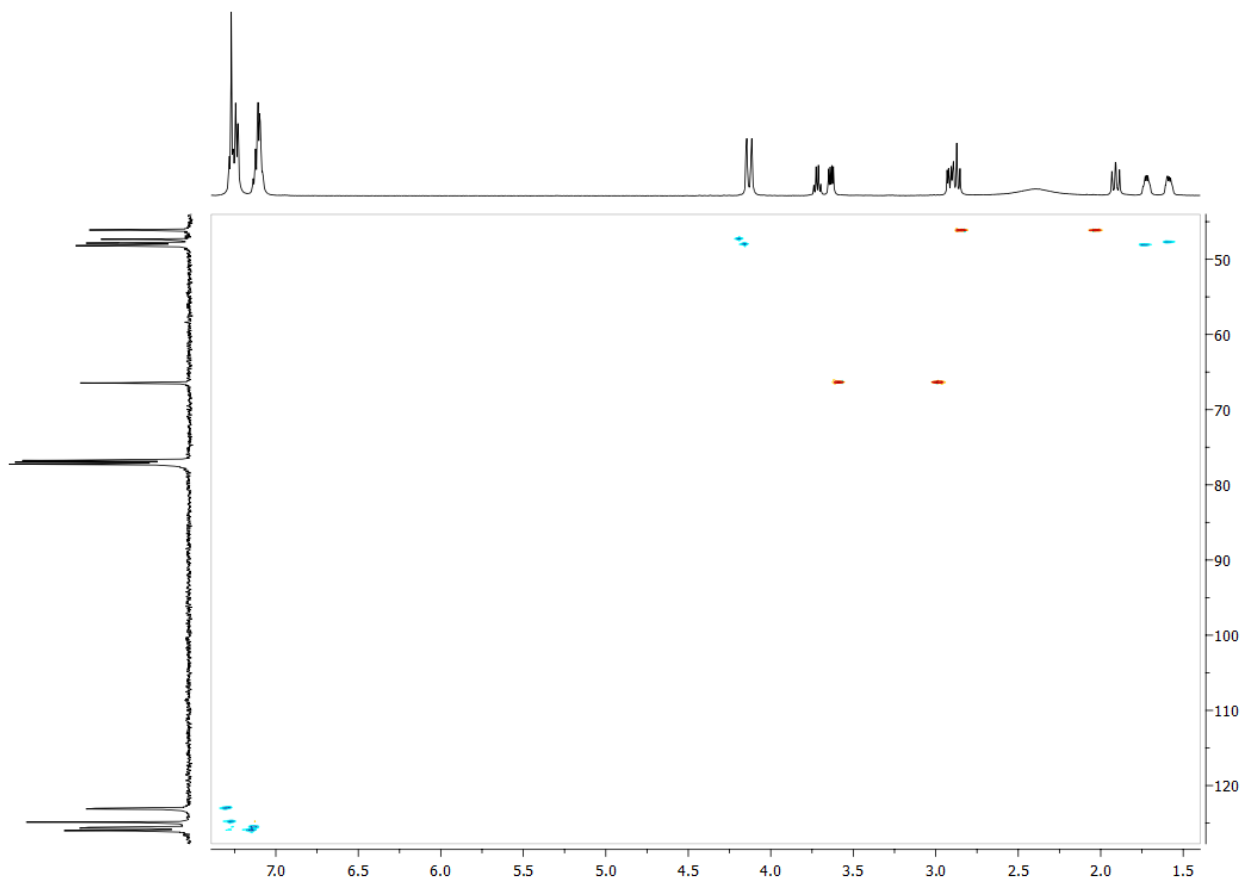

4,  $^1\text{H}$ - $^{13}\text{C}$  HSQC.

# NMR AND MASS SPECTRA

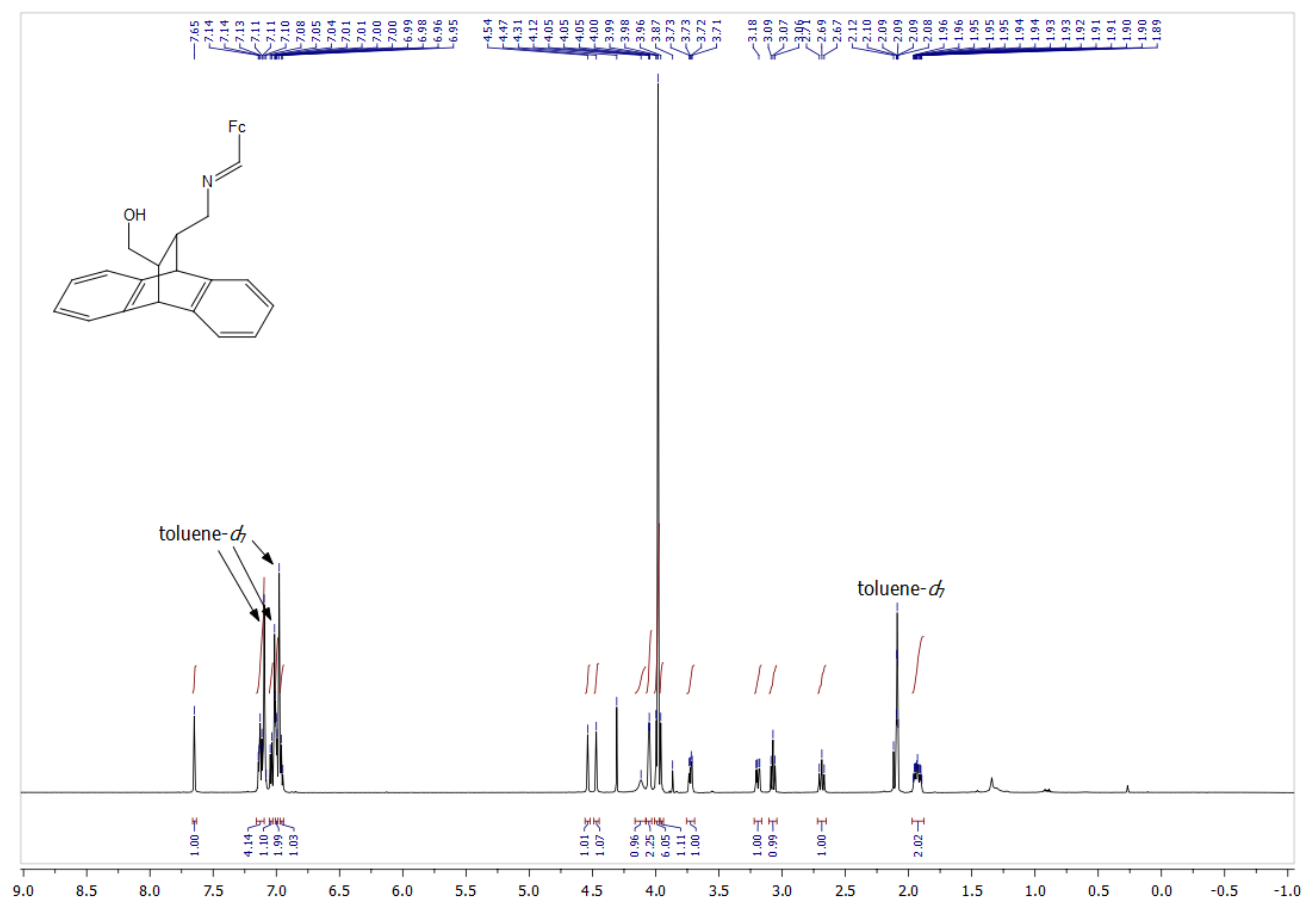

5,  $^1\text{H}$  (600.1 MHz,  $\text{CDCl}_3$ , 30 °C).

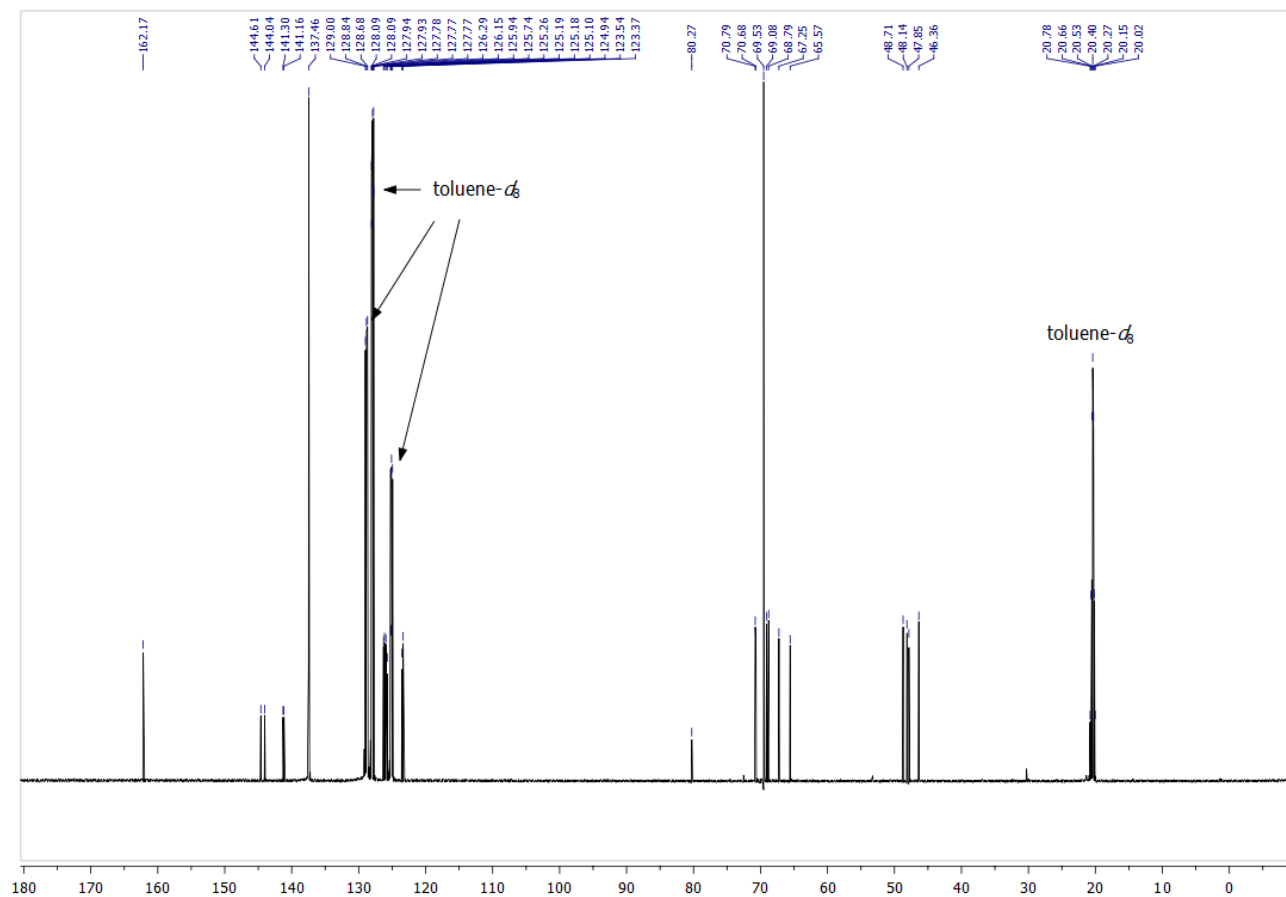

5,  $^{13}\text{C}\{^1\text{H}\}$  (150.9 MHz,  $\text{CDCl}_3$ , 30 °C).

# NMR AND MASS SPECTRA

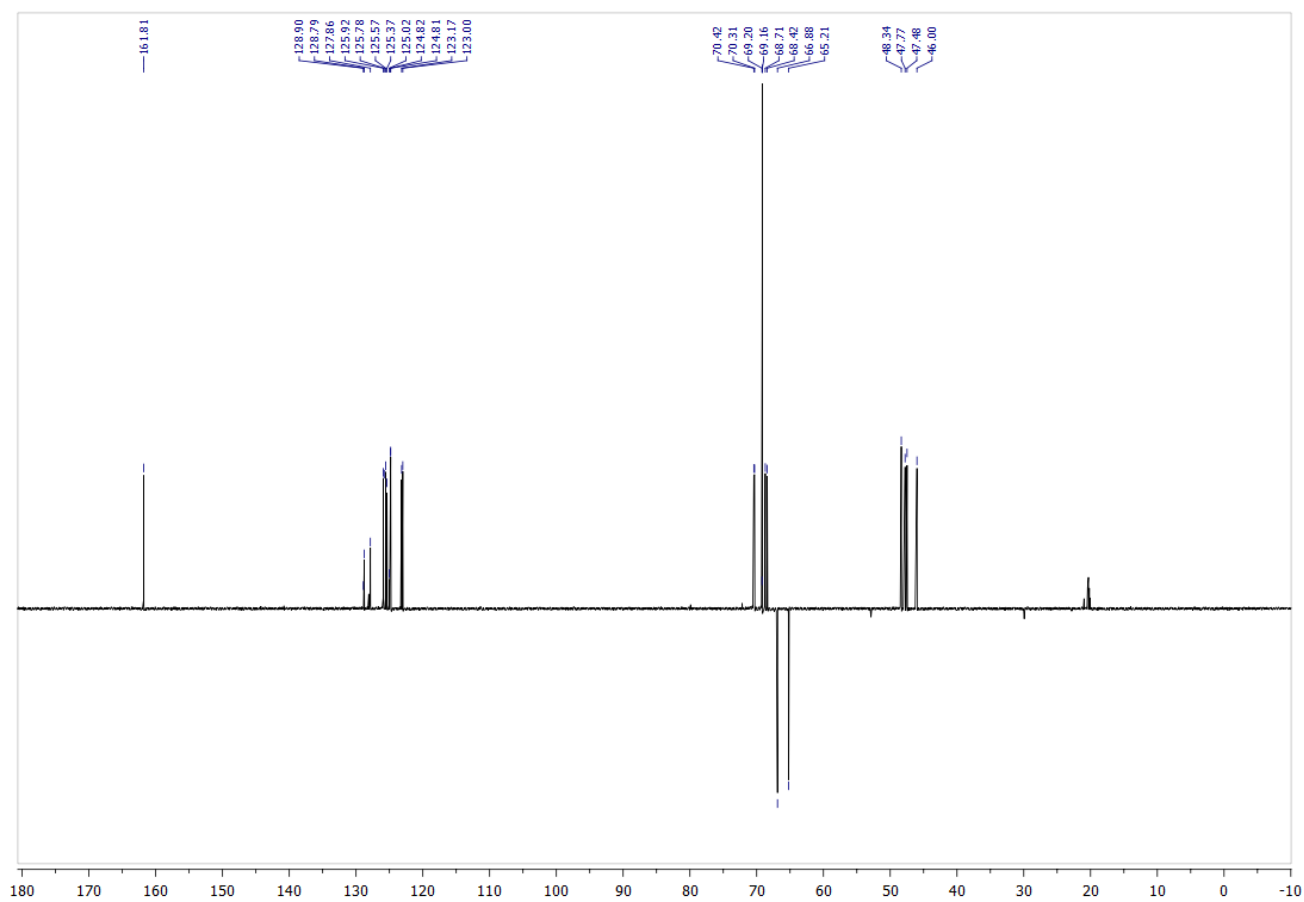

5,  $^{13}\text{C}\{^1\text{H}\}$  DEPT (150.9 MHz,  $\text{CDCl}_3$ , 30 °C).

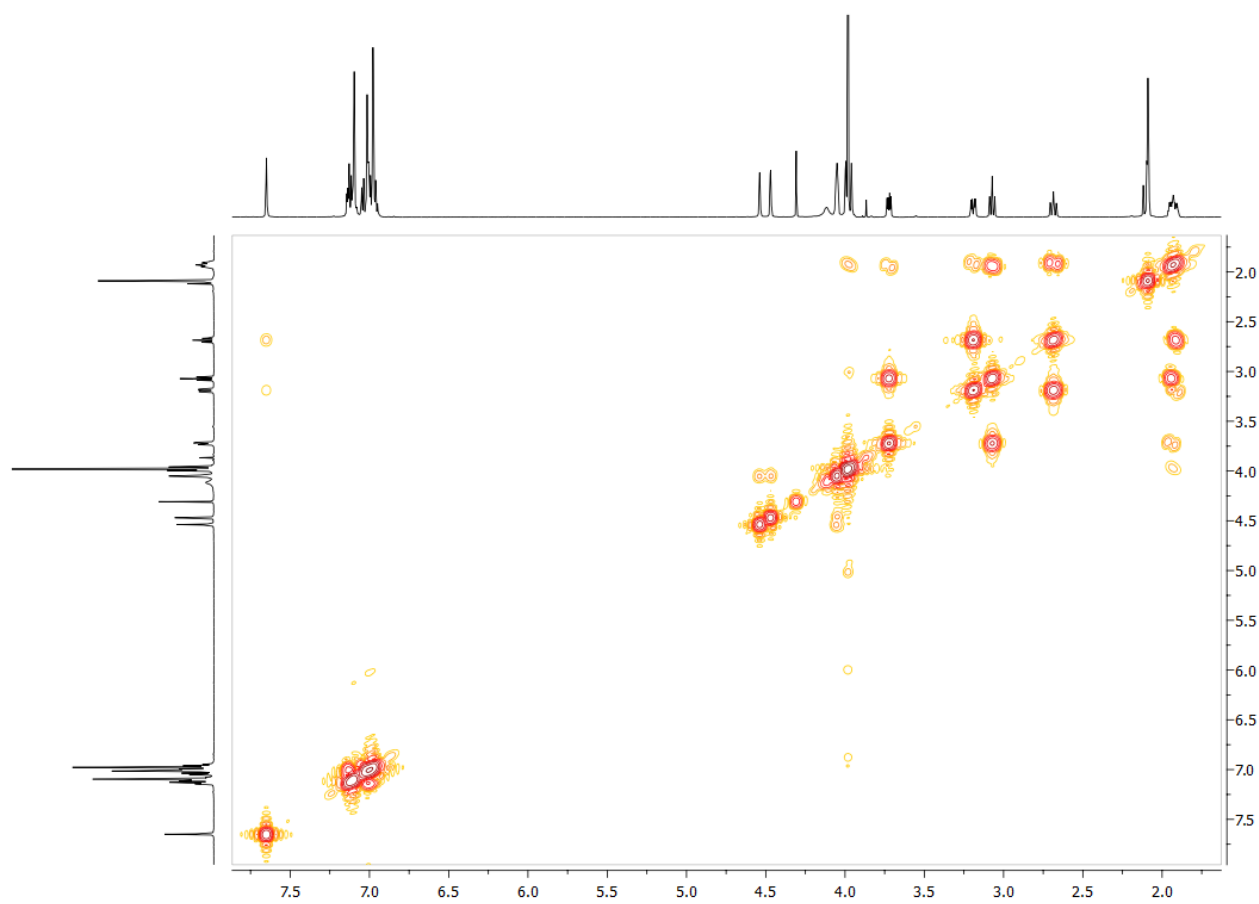

5,  $^1\text{H}\text{-}^1\text{H}$  COSY.

# NMR AND MASS SPECTRA

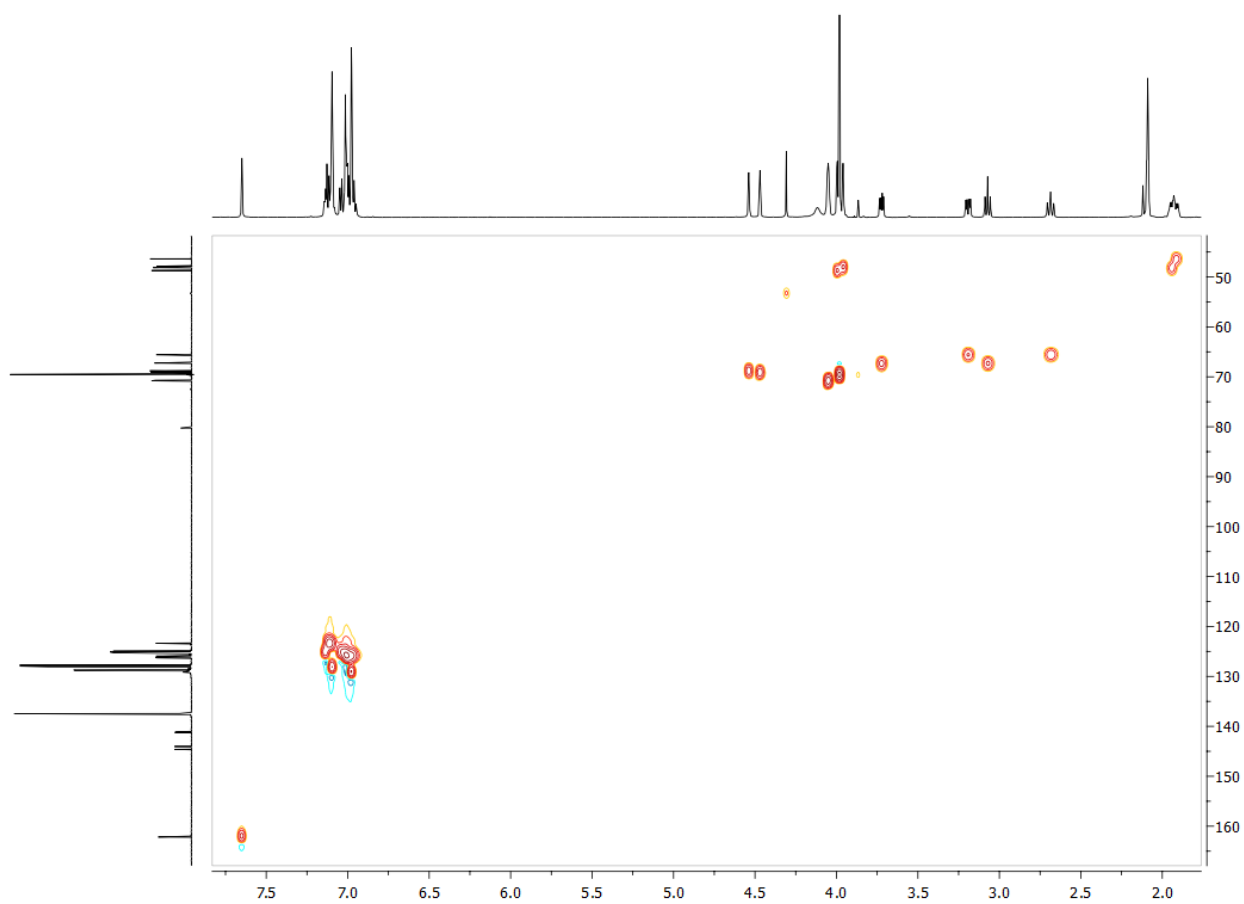

5,  $^1\text{H}$ - $^{13}\text{C}$  HSQC.

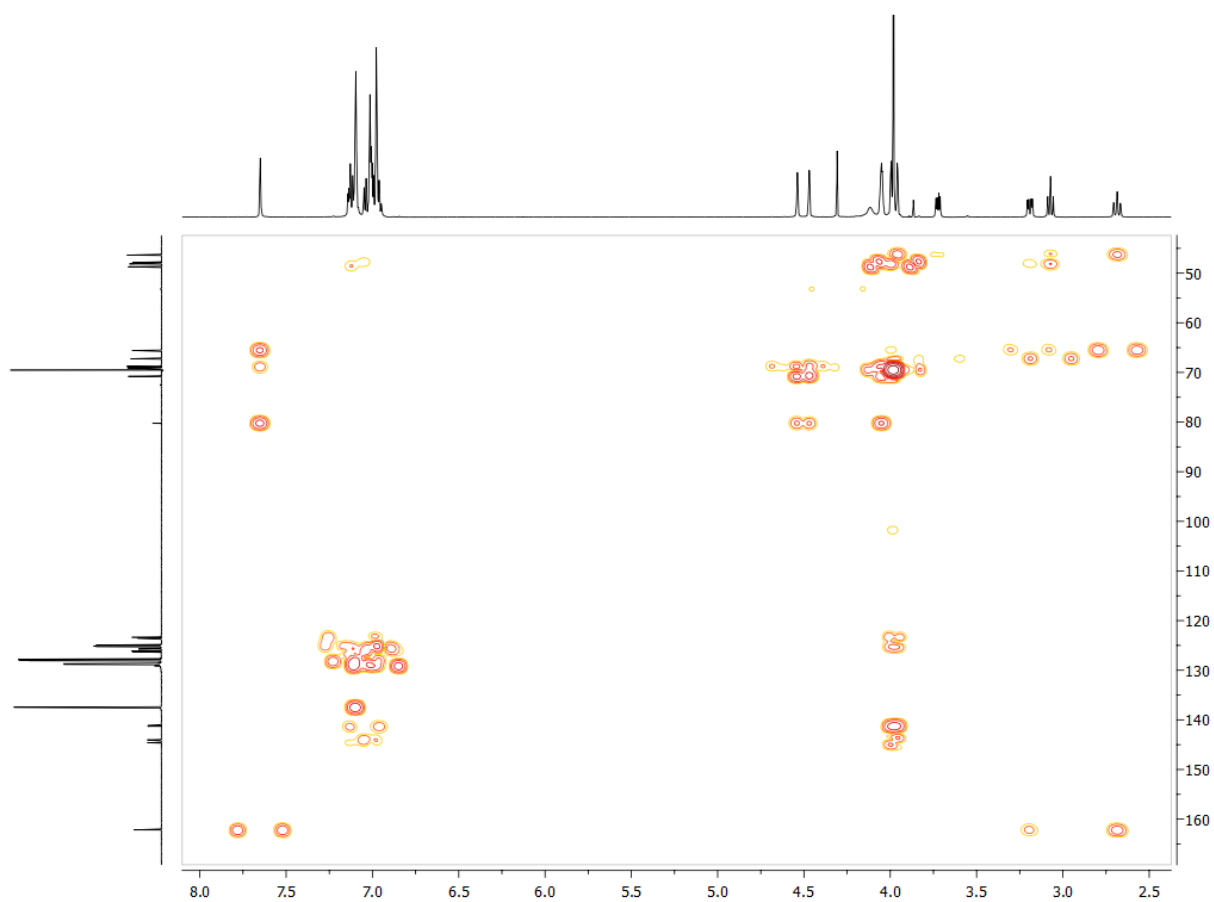

5,  $^1\text{H}$ - $^{13}\text{C}$  HMBC.

# NMR AND MASS SPECTRA

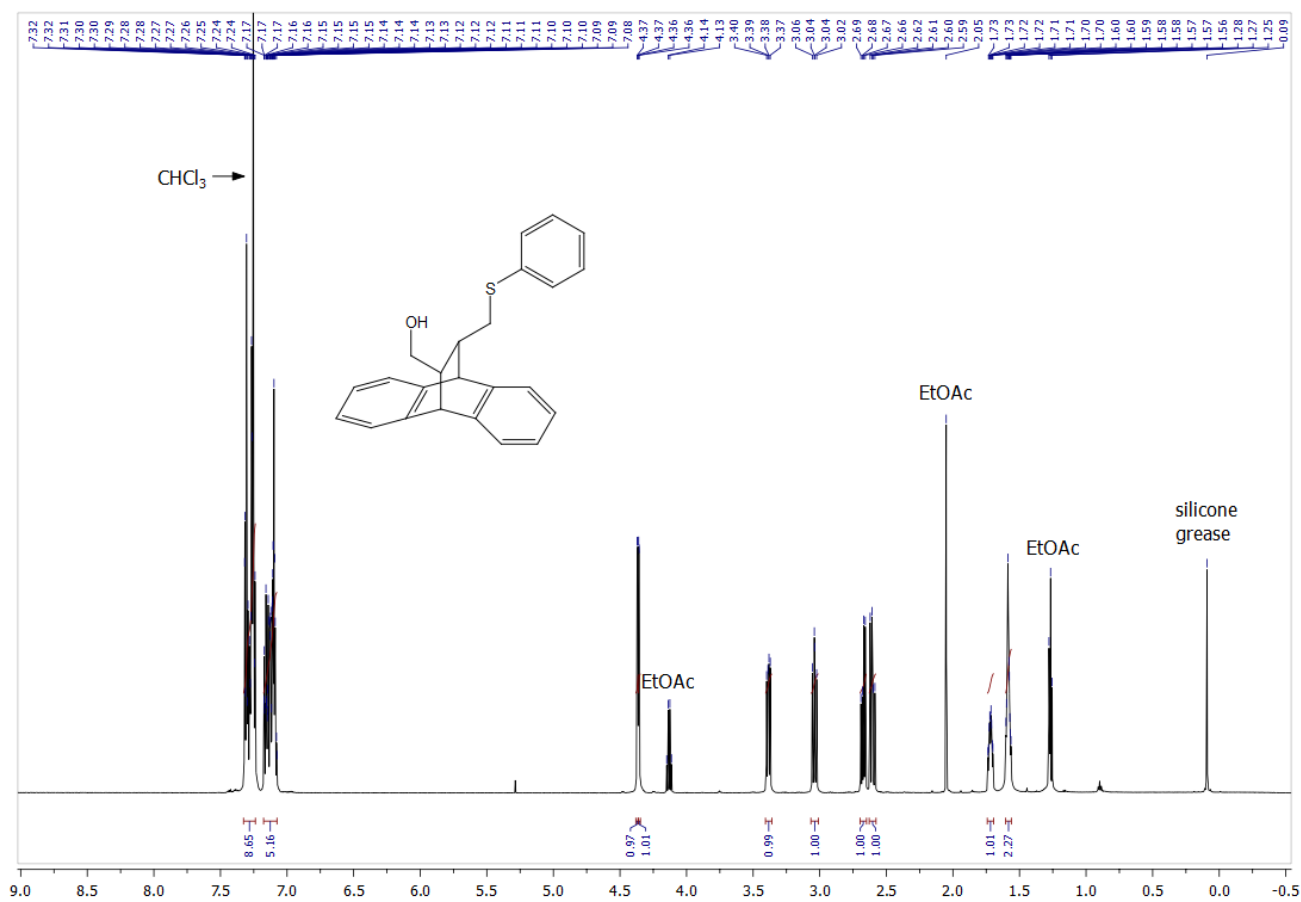

**6**,  $^1\text{H}$  (600.1 MHz,  $\text{CDCl}_3$ , 30 °C).

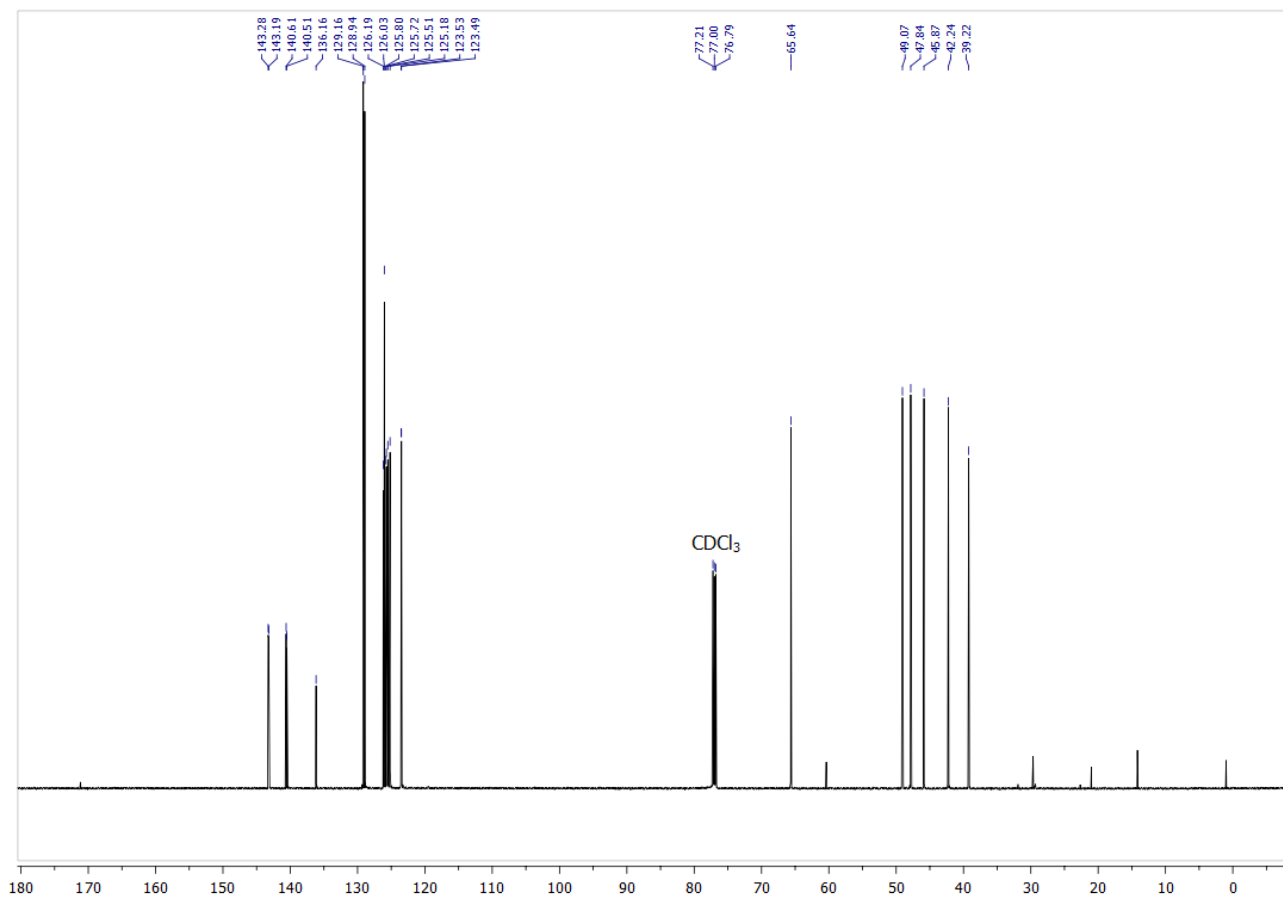

**6**,  $^{13}\text{C}\{^1\text{H}\}$  (150.9 MHz,  $\text{CDCl}_3$ , 30 °C).

# NMR AND MASS SPECTRA

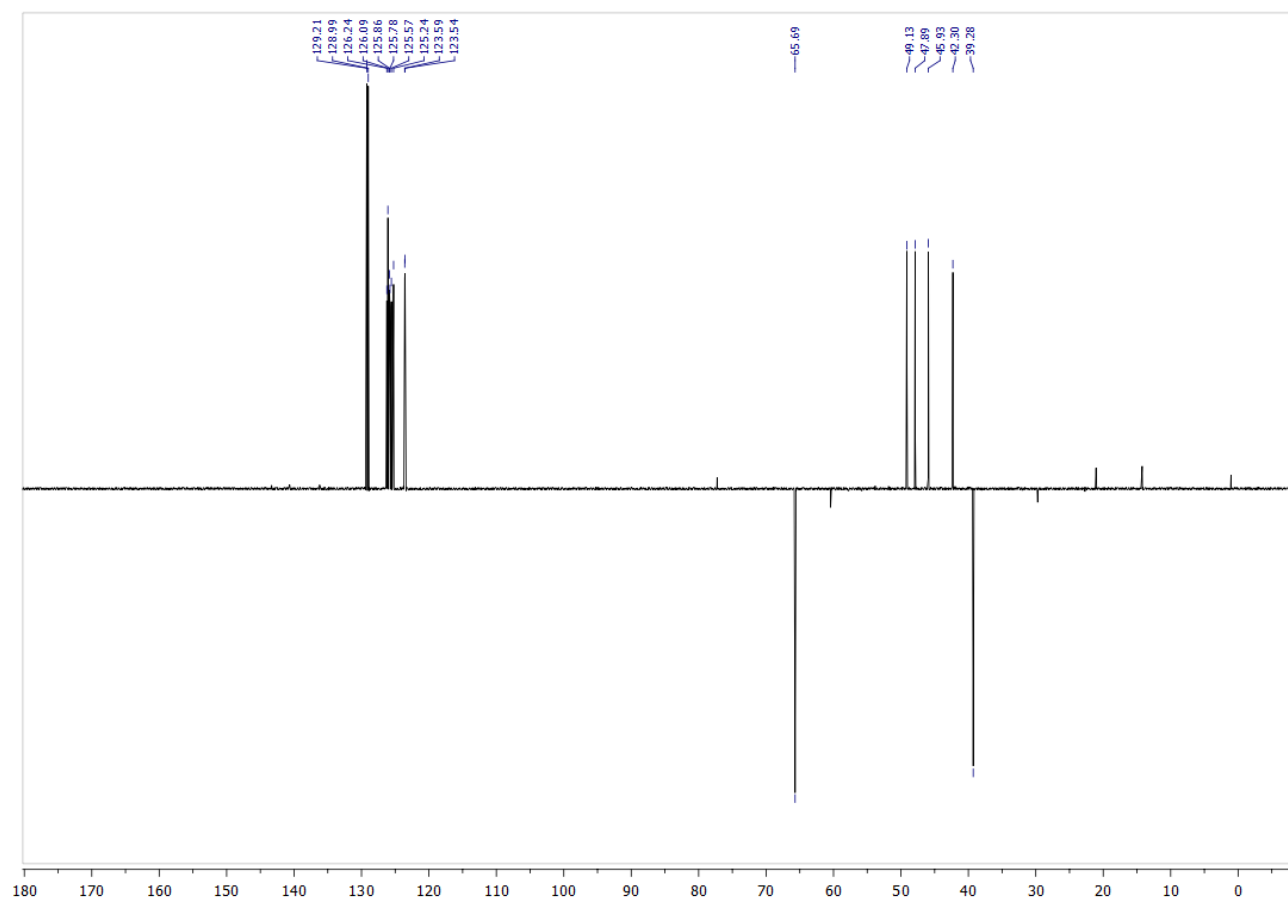

6,  $^{13}\text{C}\{^1\text{H}\}$  DEPT (150.9 MHz,  $\text{CDCl}_3$ , 30 °C).

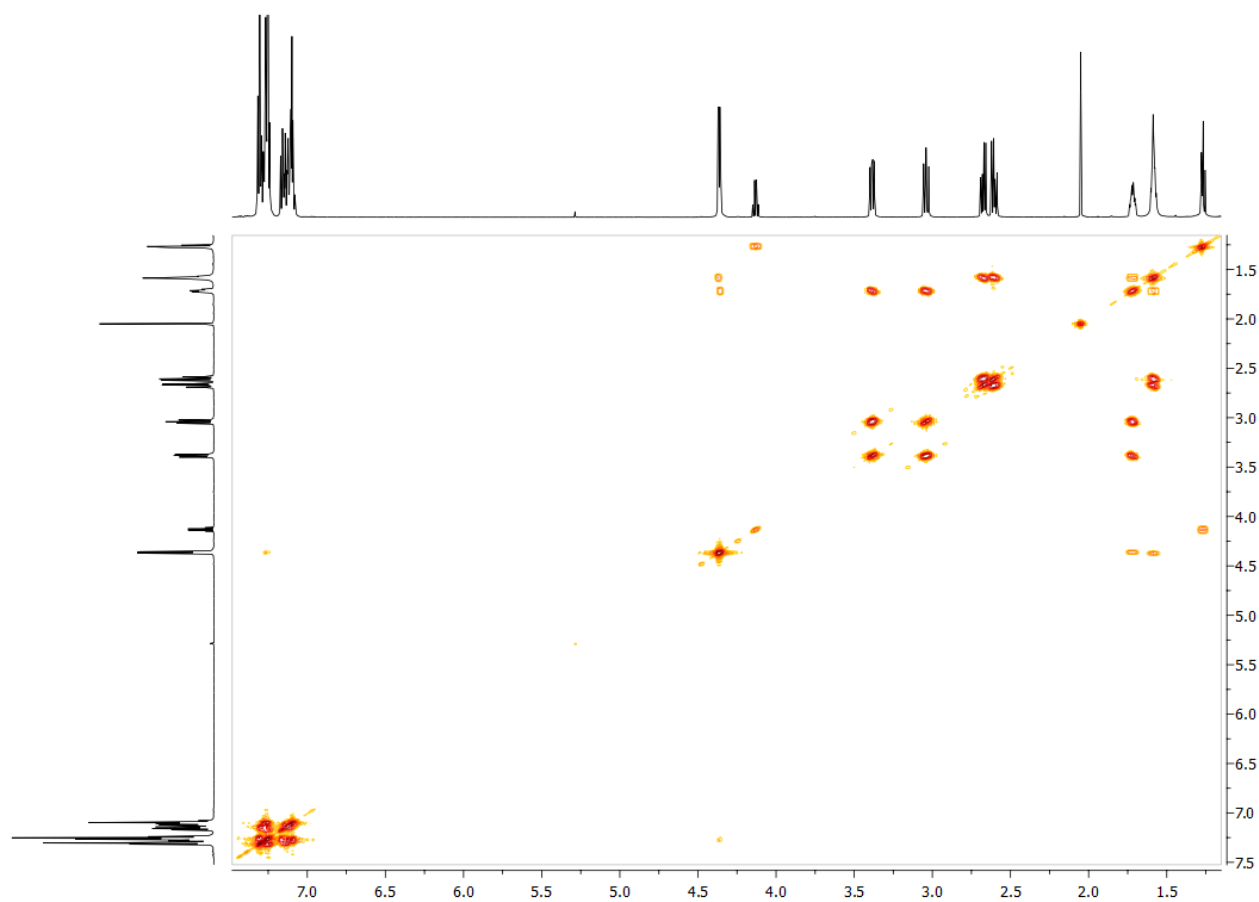

6,  $^1\text{H}\text{-}^1\text{H}$  COSY.

# NMR AND MASS SPECTRA

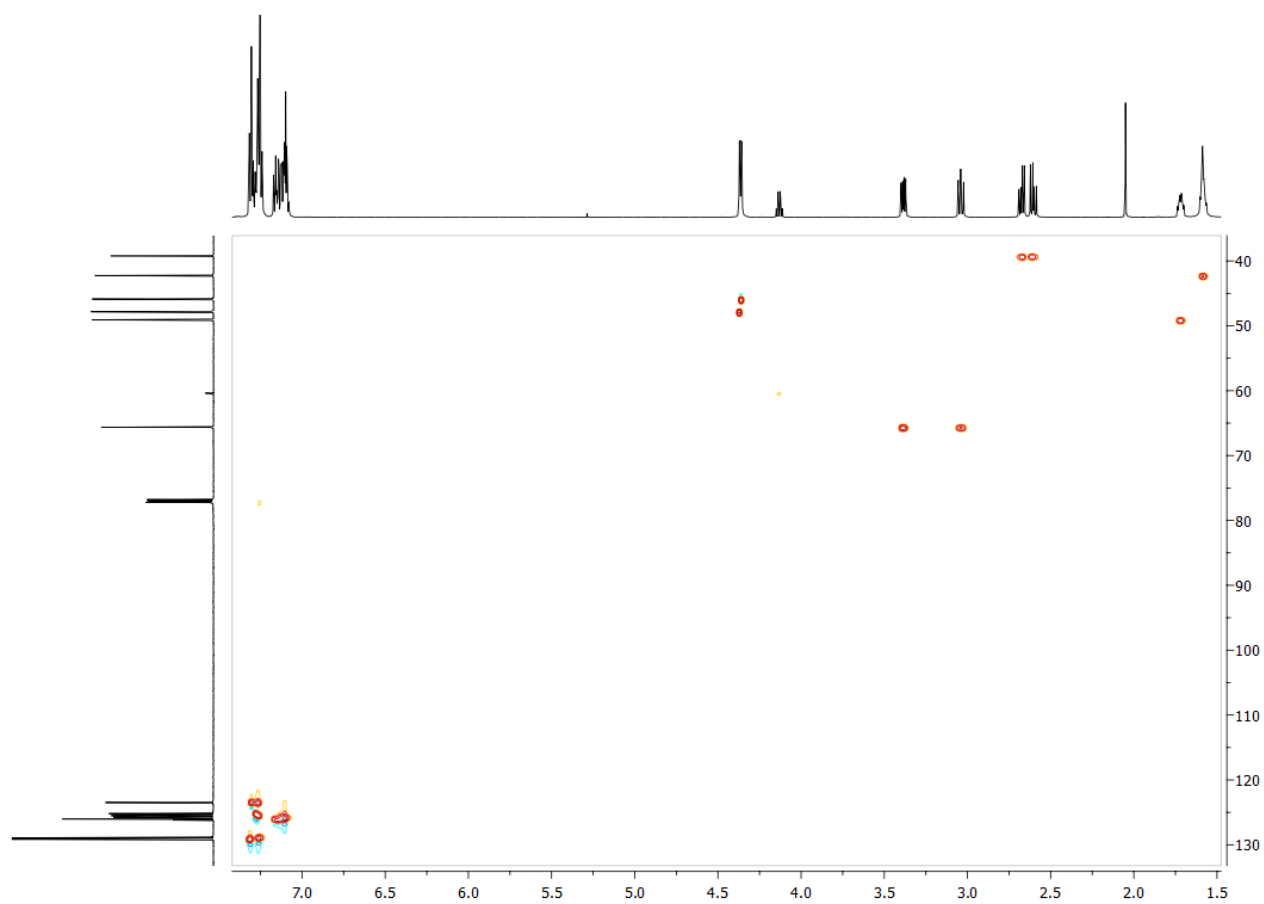

6,  $^1\text{H}$ - $^{13}\text{C}$  HSQC.

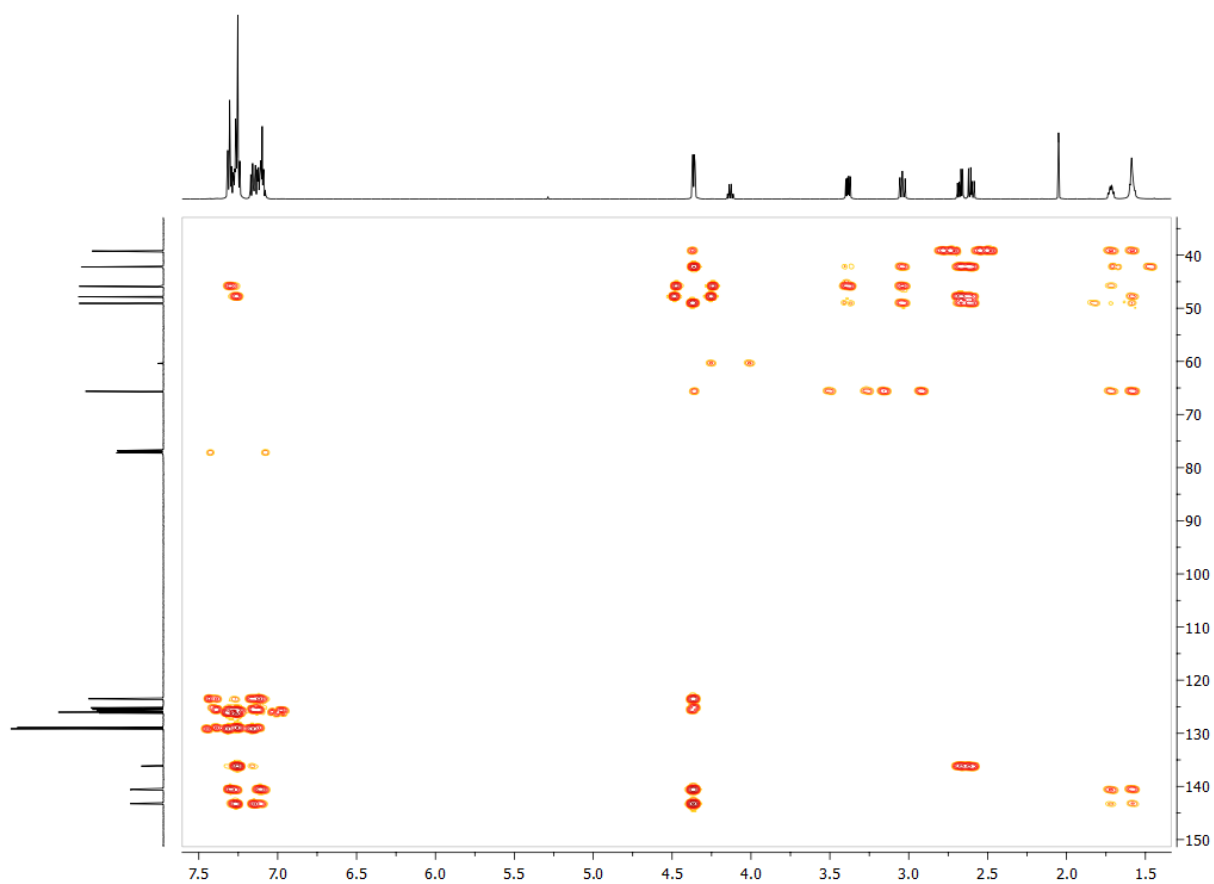

6,  $^1\text{H}$ - $^{13}\text{C}$  HMBC.



## NMR AND MASS SPECTRA

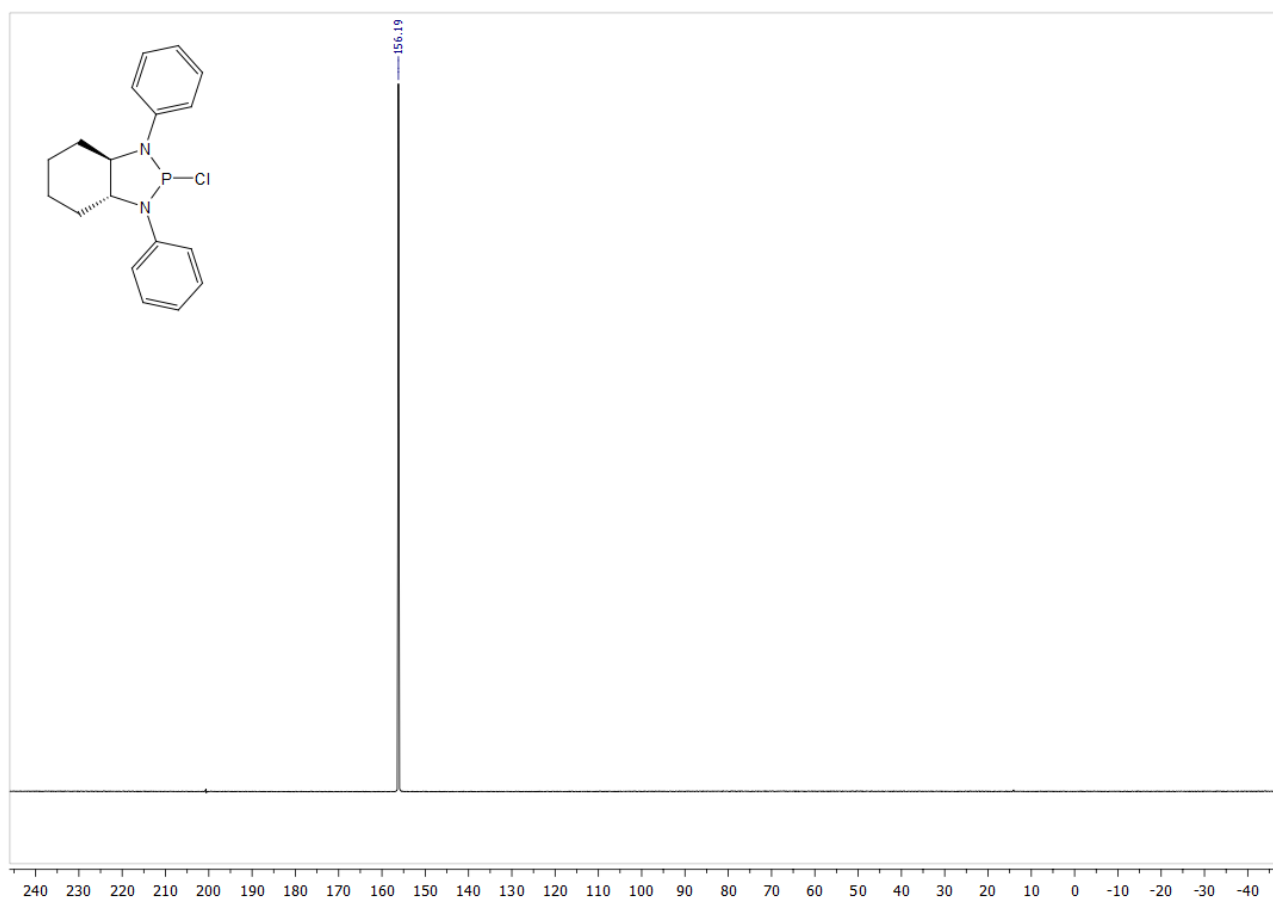

**8**,  $^{31}\text{P}\{^1\text{H}\}$  (202.4 MHz,  $\text{CDCl}_3$ , ambient temperature).

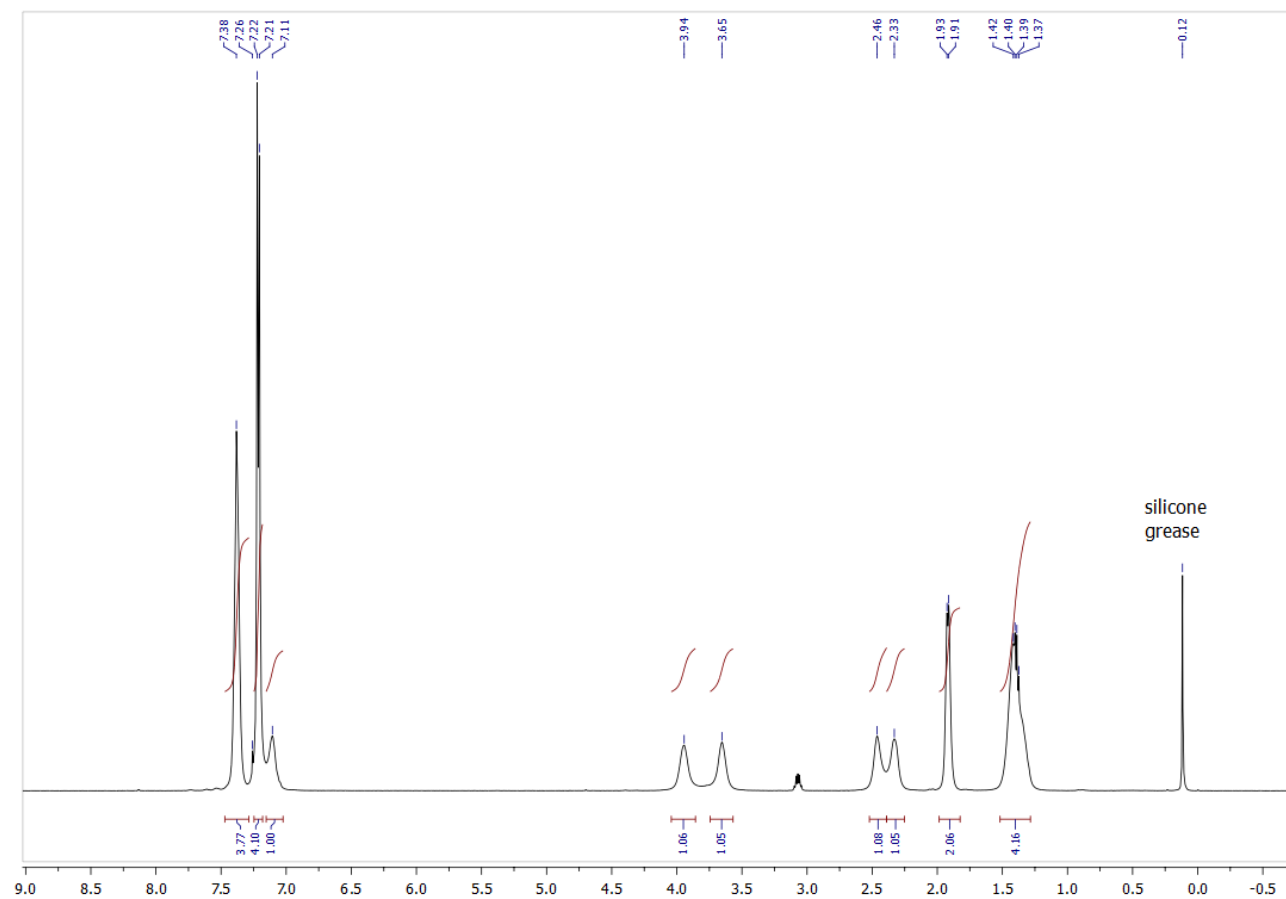

**8**,  $^1\text{H}$  (499.9 MHz,  $\text{CDCl}_3$ , ambient temperature).

# NMR AND MASS SPECTRA

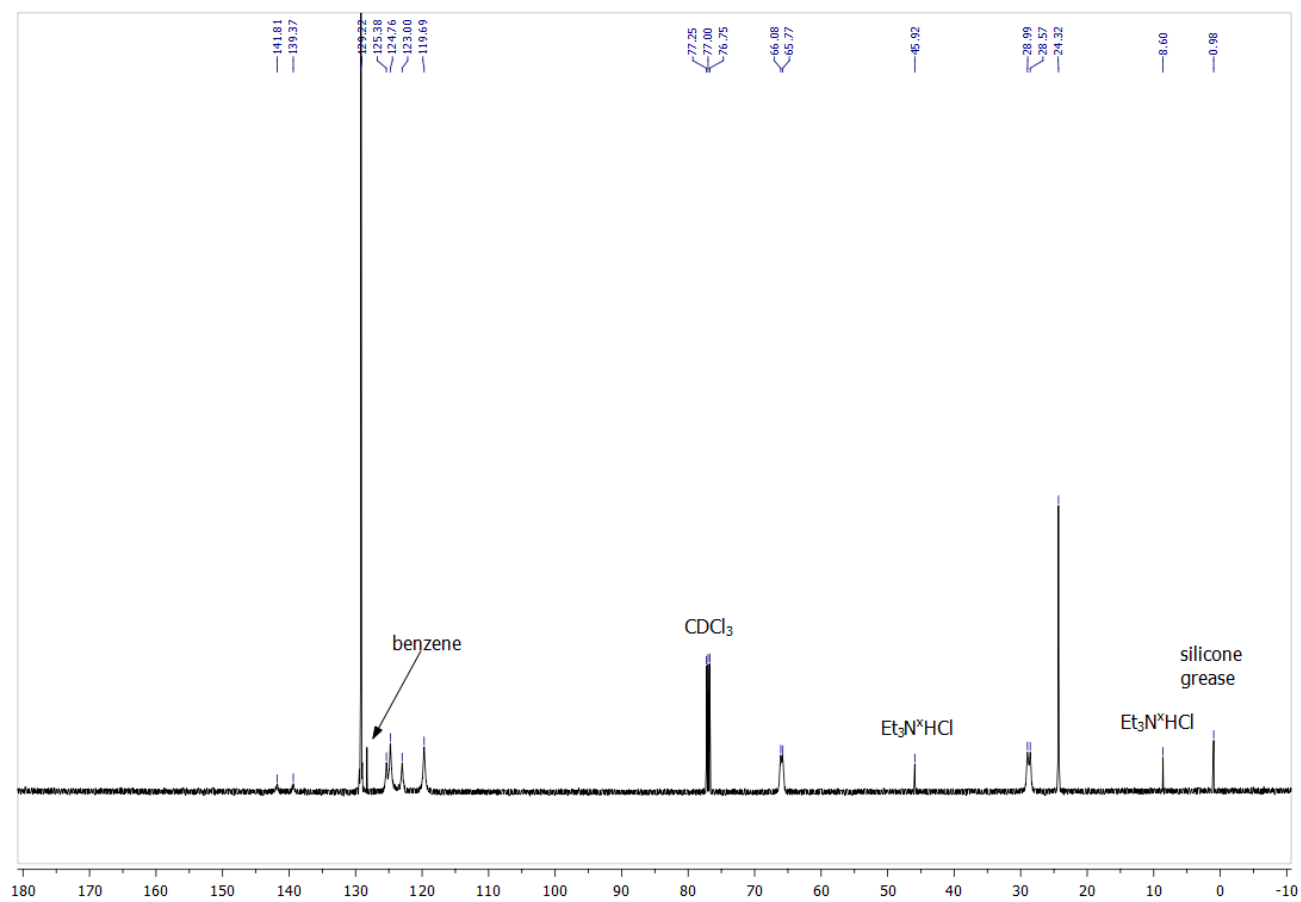

**8**,  $^{13}\text{C}\{^1\text{H}\}$  (125.7 MHz,  $\text{CDCl}_3$ , ambient temperature).

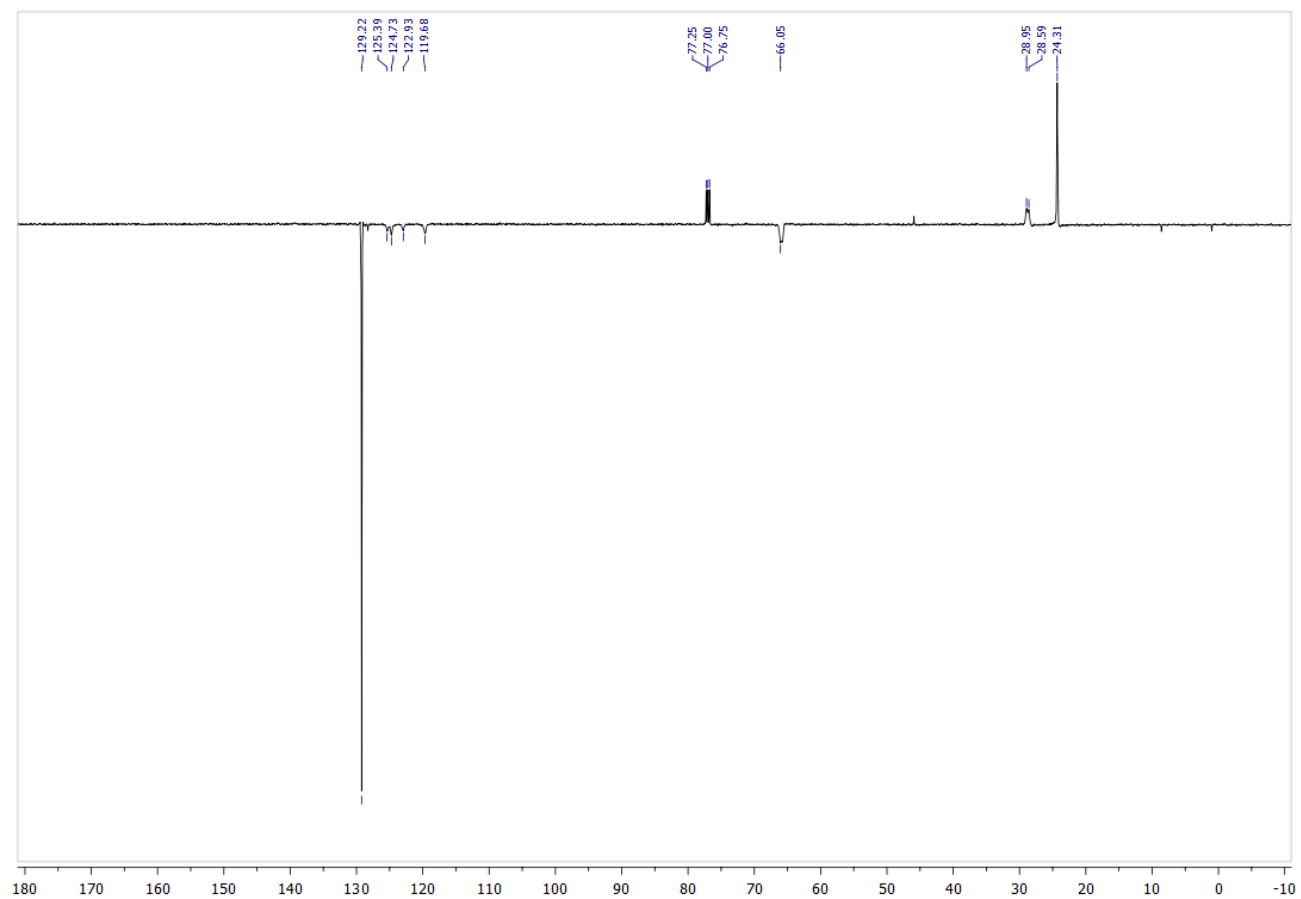

**8**,  $^{13}\text{C}\{^1\text{H}\}$  APT (125.7 MHz,  $\text{CDCl}_3$ , ambient temperature).

# NMR AND MASS SPECTRA

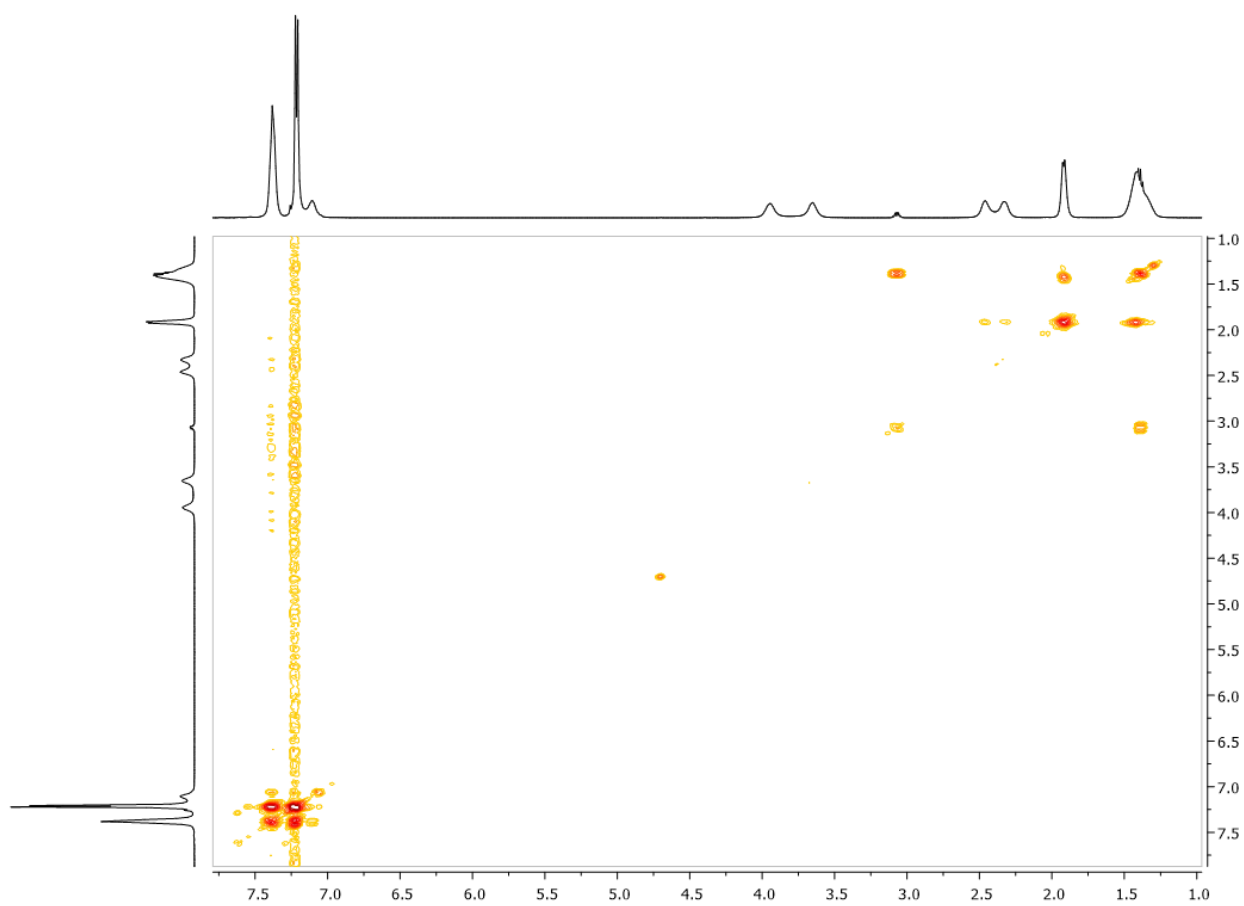

8,  $^1\text{H}$ - $^1\text{H}$  COSY.

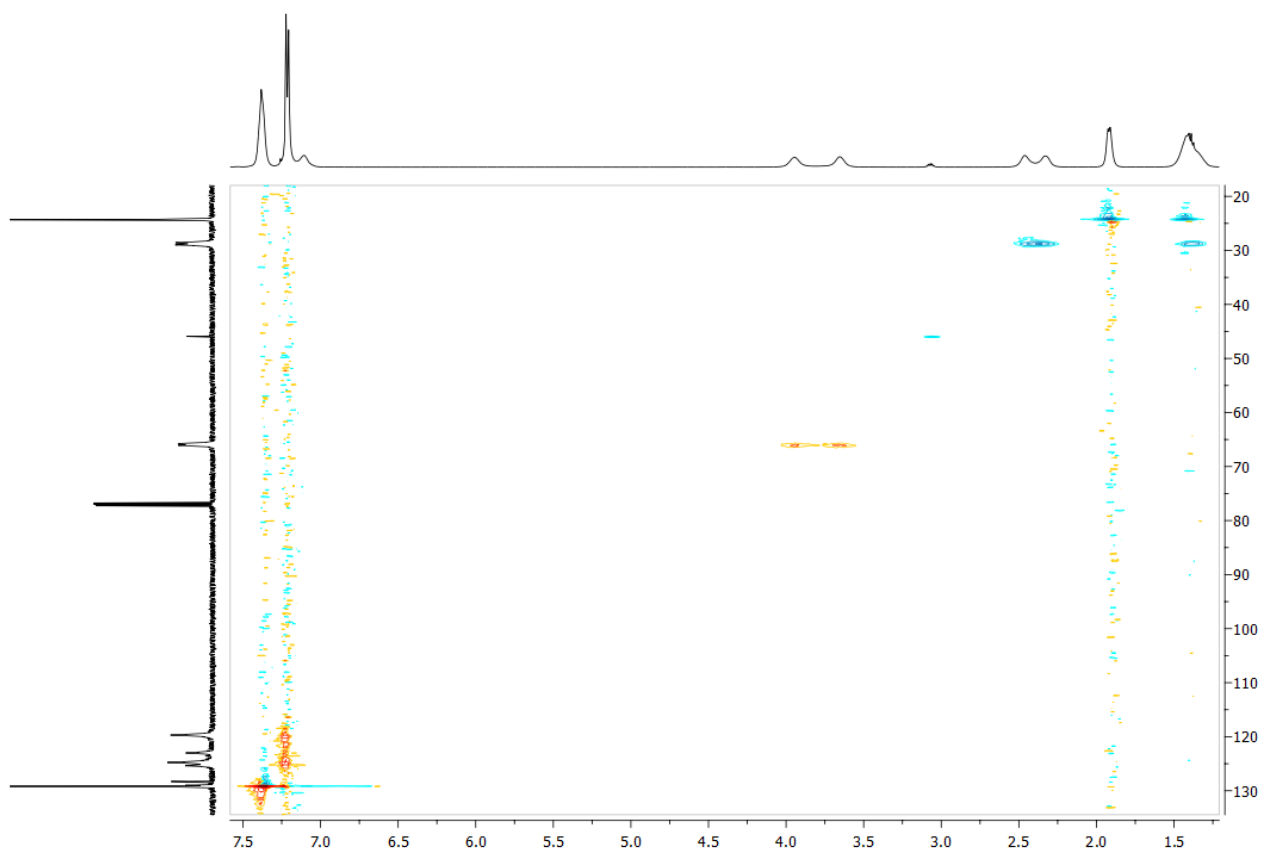

8,  $^1\text{H}$ - $^{13}\text{C}$  HSQC.

# NMR AND MASS SPECTRA

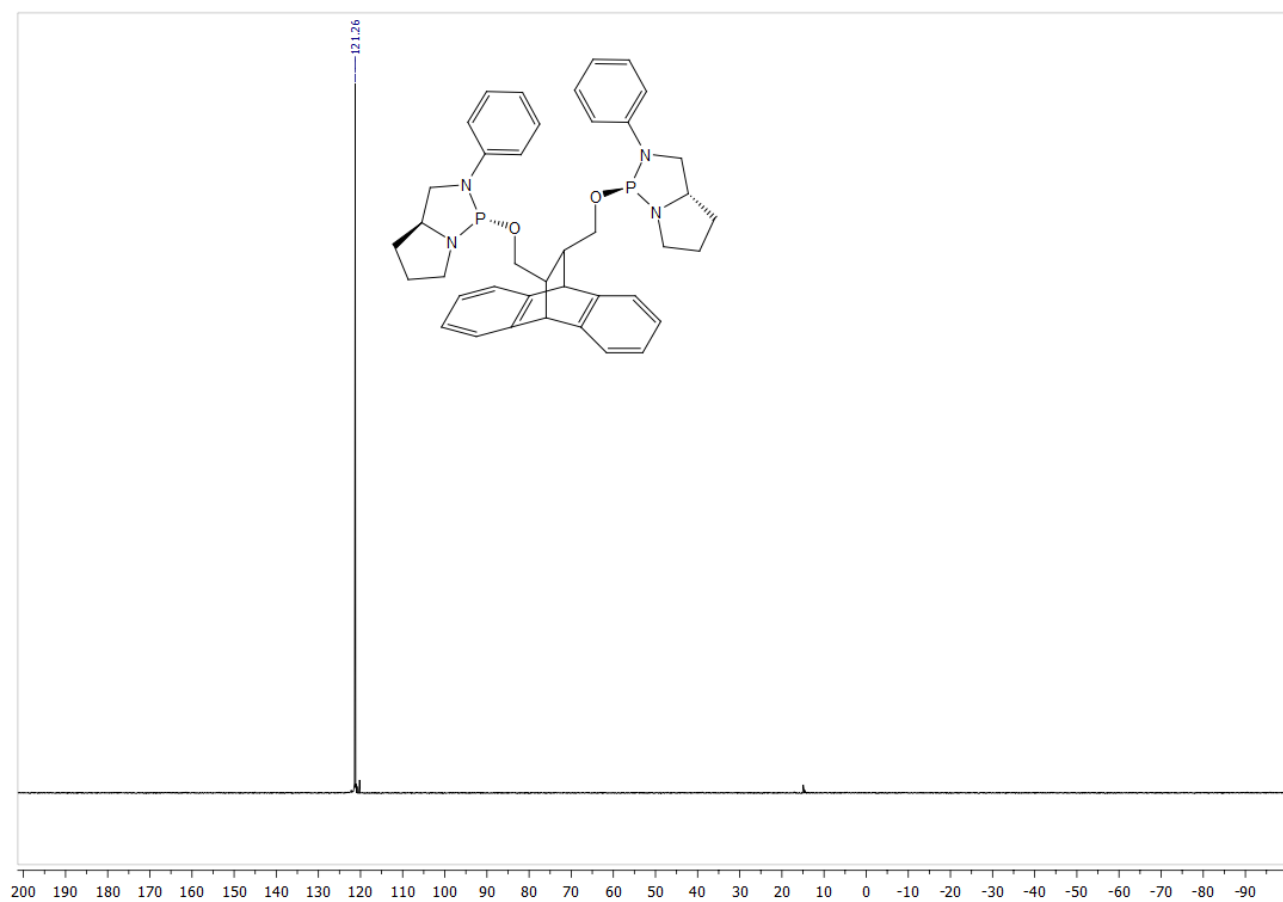

**L1a**,  $^{31}\text{P}\{^1\text{H}\}$  (242.9 MHz,  $\text{CDCl}_3$ , 30 °C).

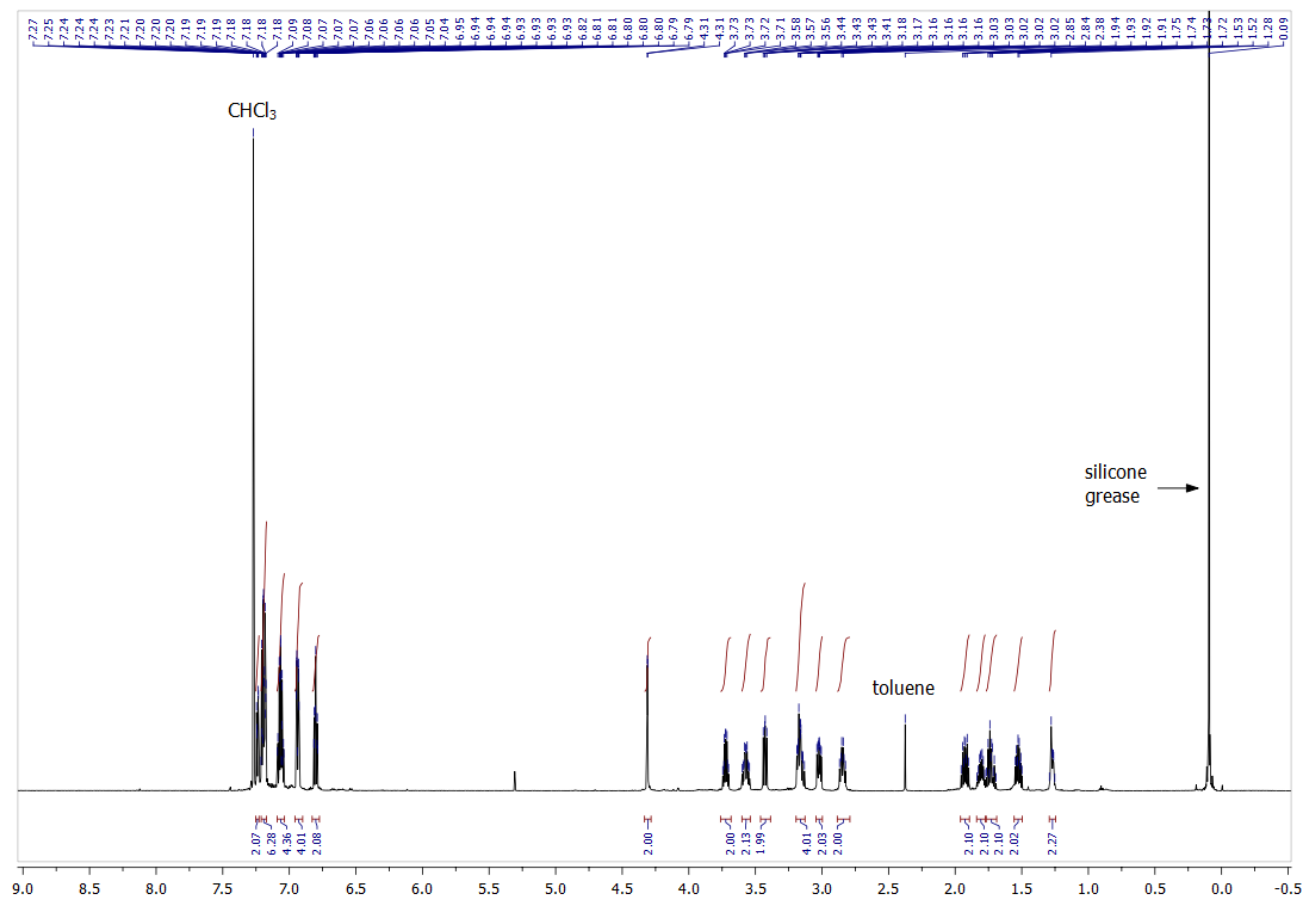

**L1a**,  $^1\text{H}$  (600.1 MHz,  $\text{CDCl}_3$ , 30 °C).

# NMR AND MASS SPECTRA

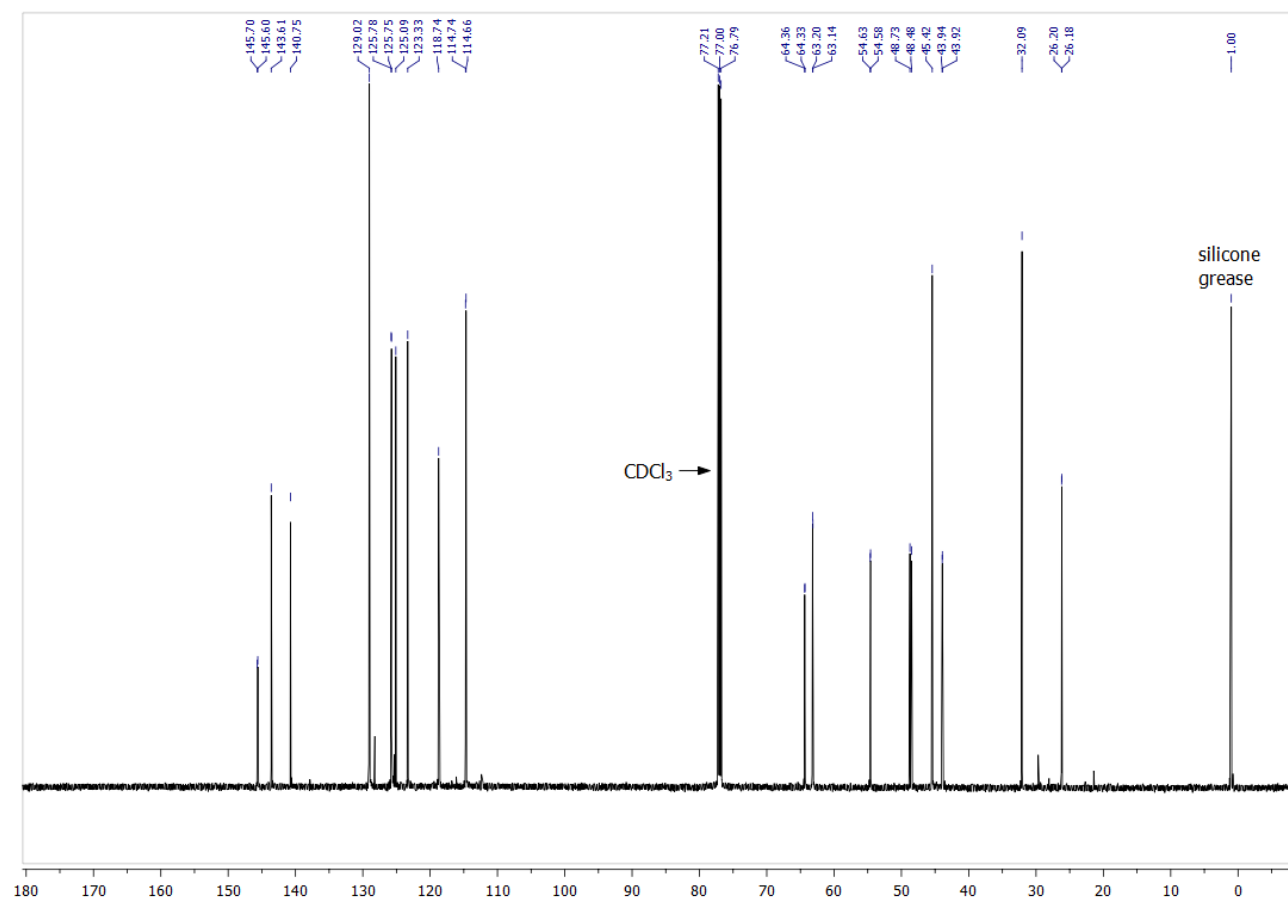

L1a, <sup>13</sup>C{<sup>1</sup>H} (150.9 MHz, CDCl<sub>3</sub>, 30 °C).

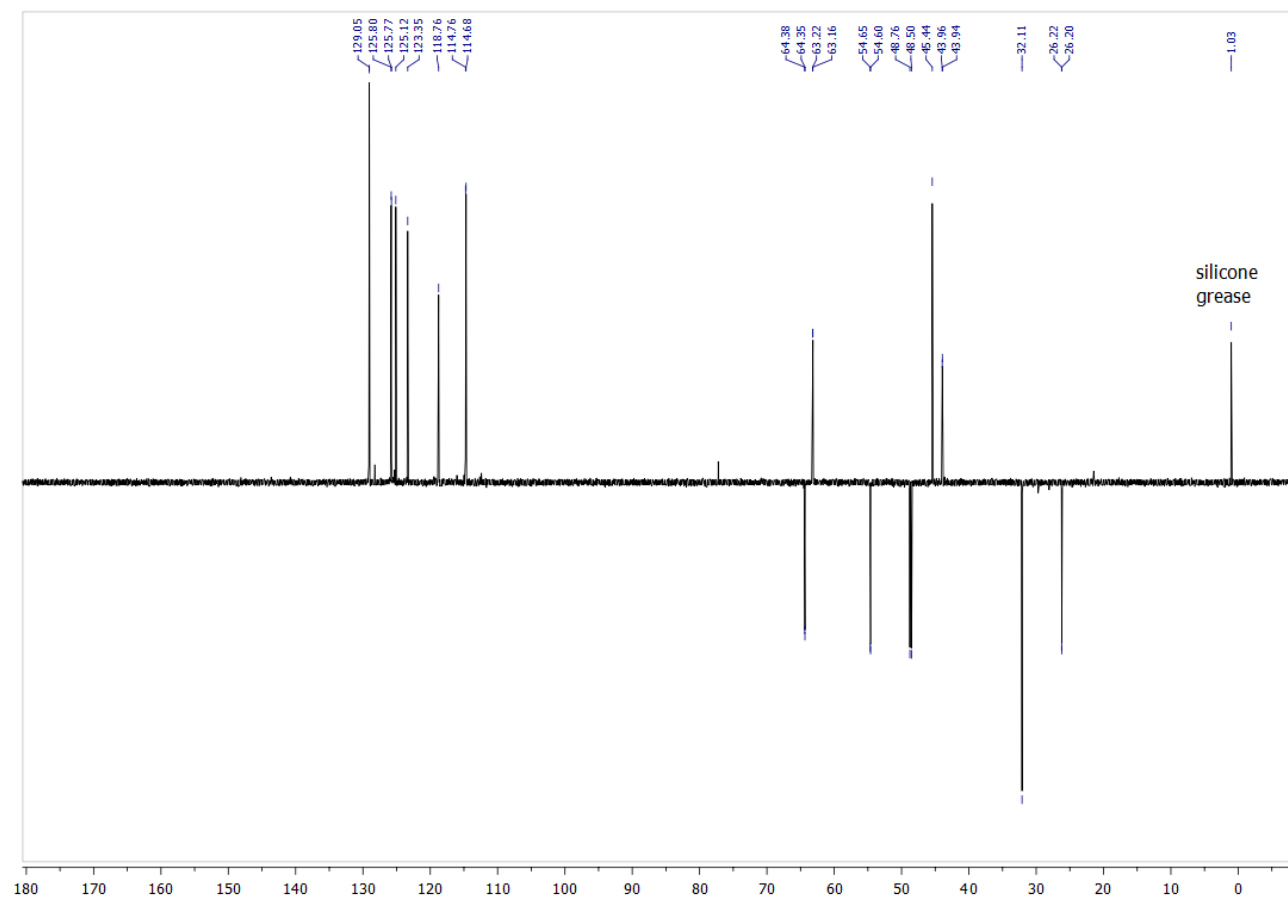

L1a, <sup>13</sup>C{<sup>1</sup>H} DEPT (150.9 MHz, CDCl<sub>3</sub>, 30 °C).

# NMR AND MASS SPECTRA

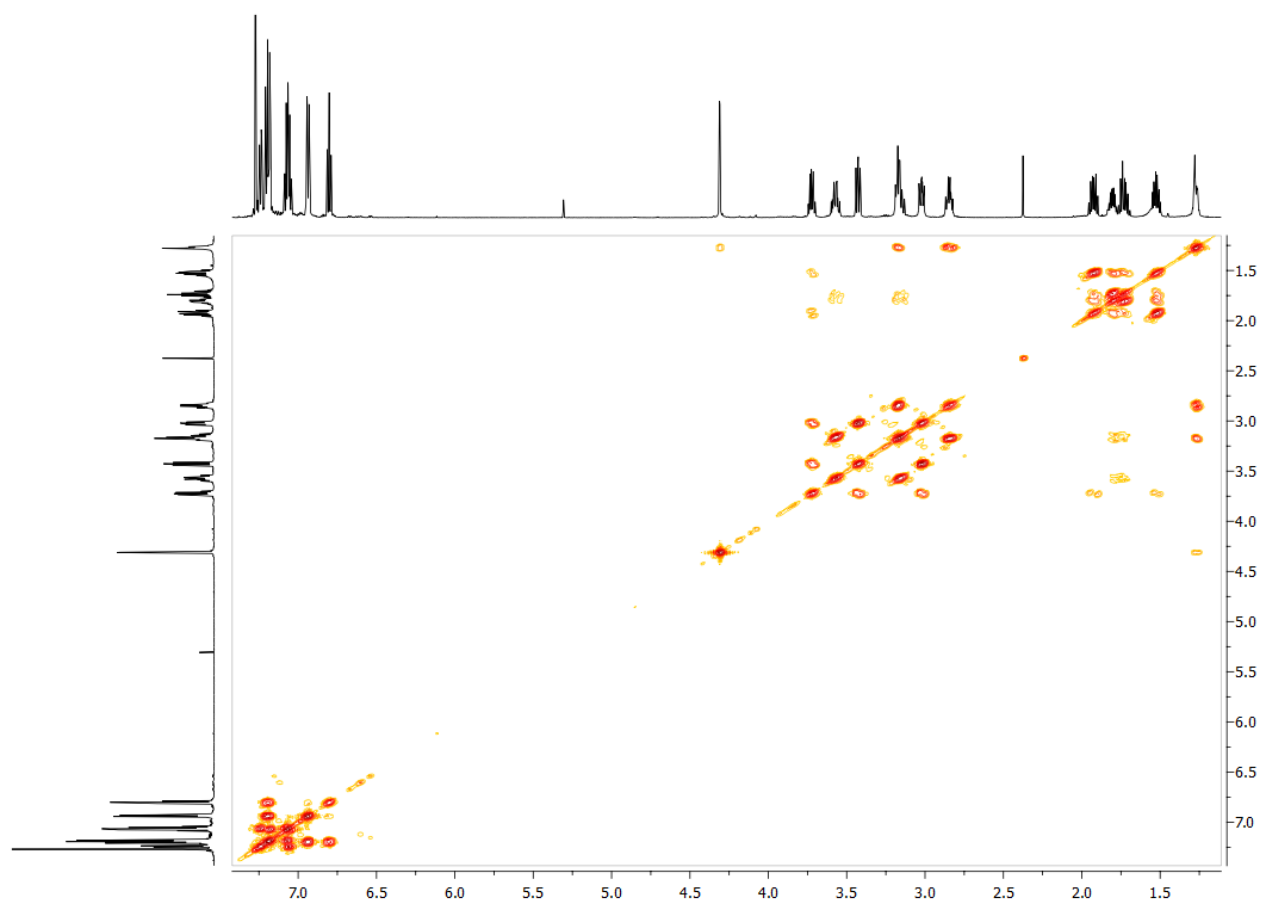

L1a,  $^1\text{H}$ - $^1\text{H}$  COSY.

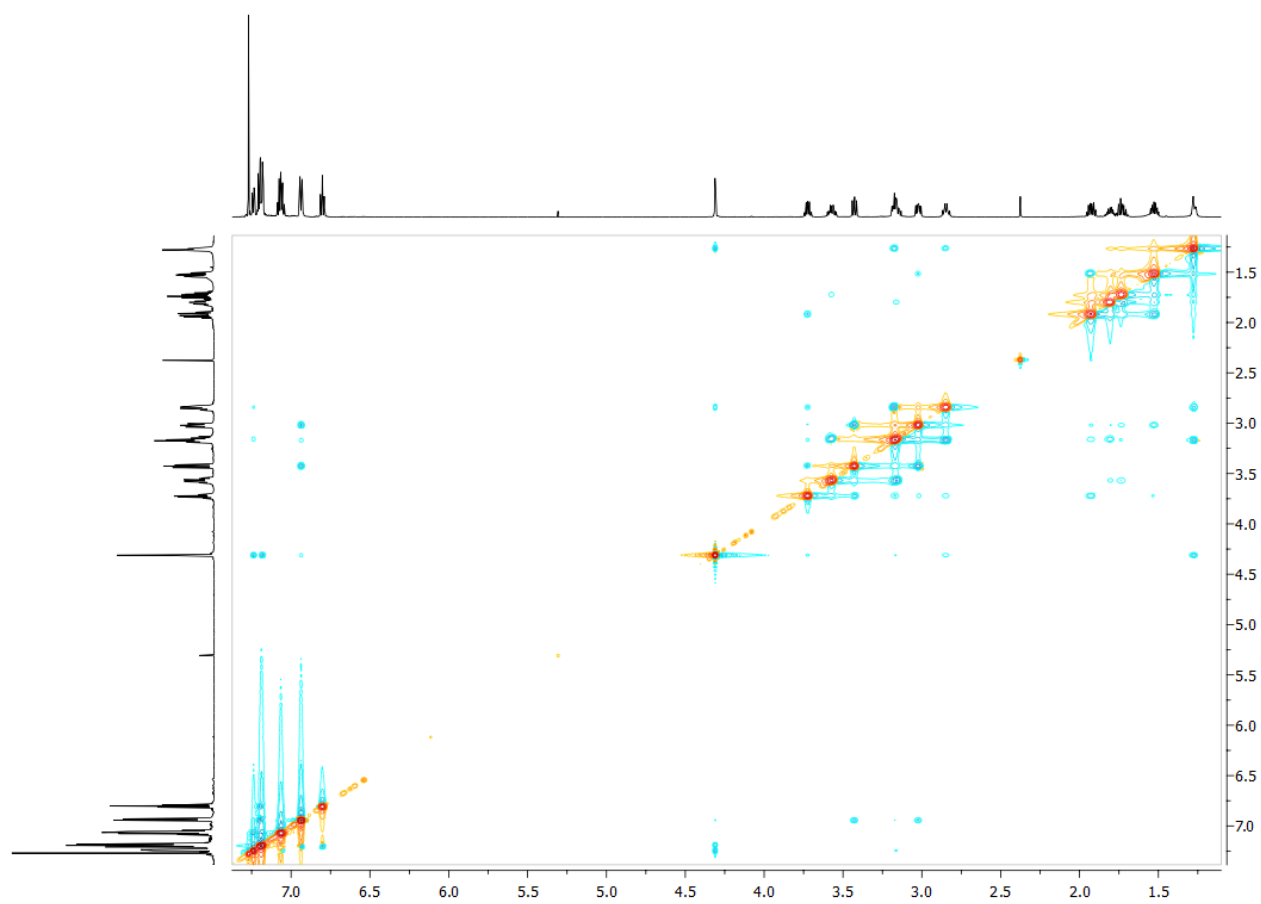

L1a,  $^1\text{H}$ - $^1\text{H}$  NOESY.

# NMR AND MASS SPECTRA

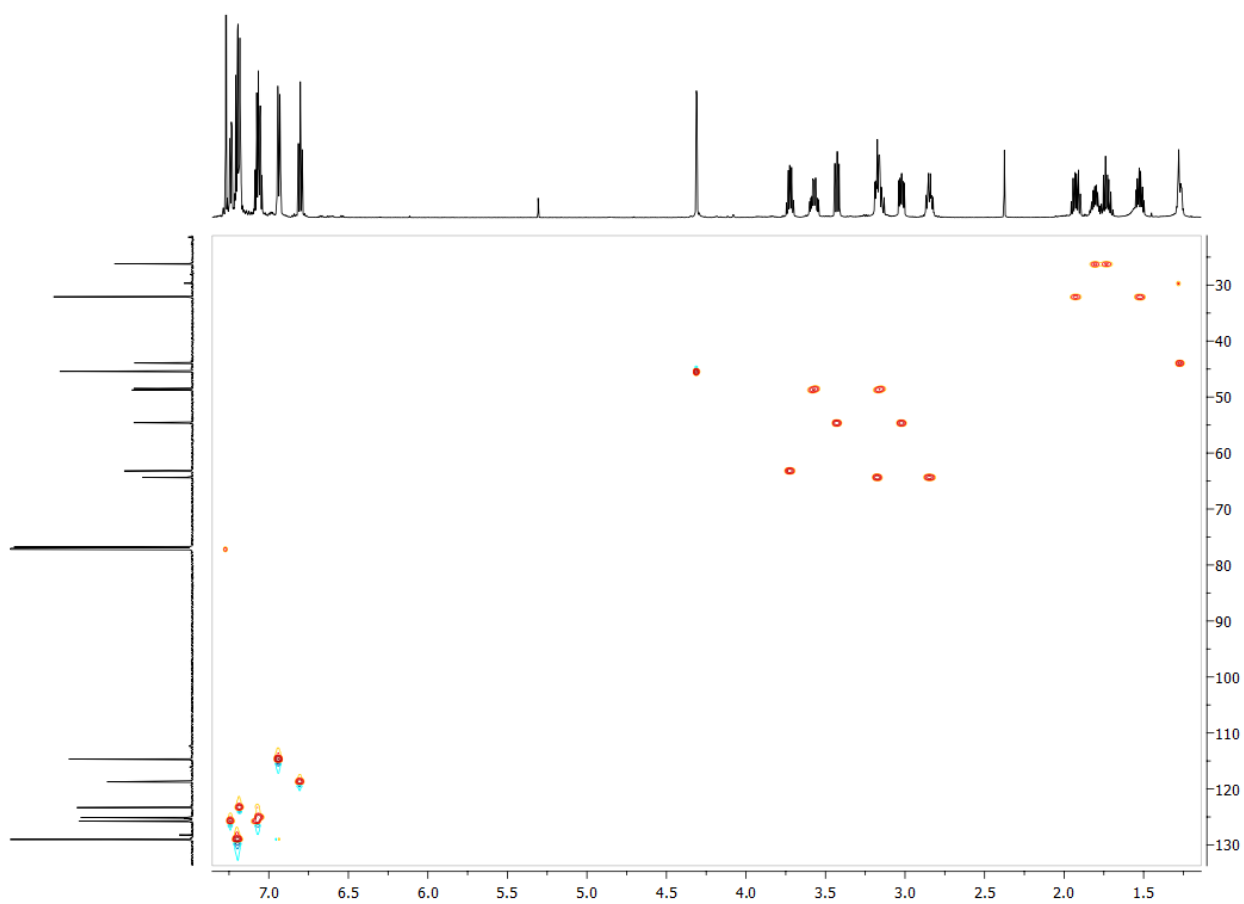

L1a,  $^1\text{H}$ - $^{13}\text{C}$  HSQC.

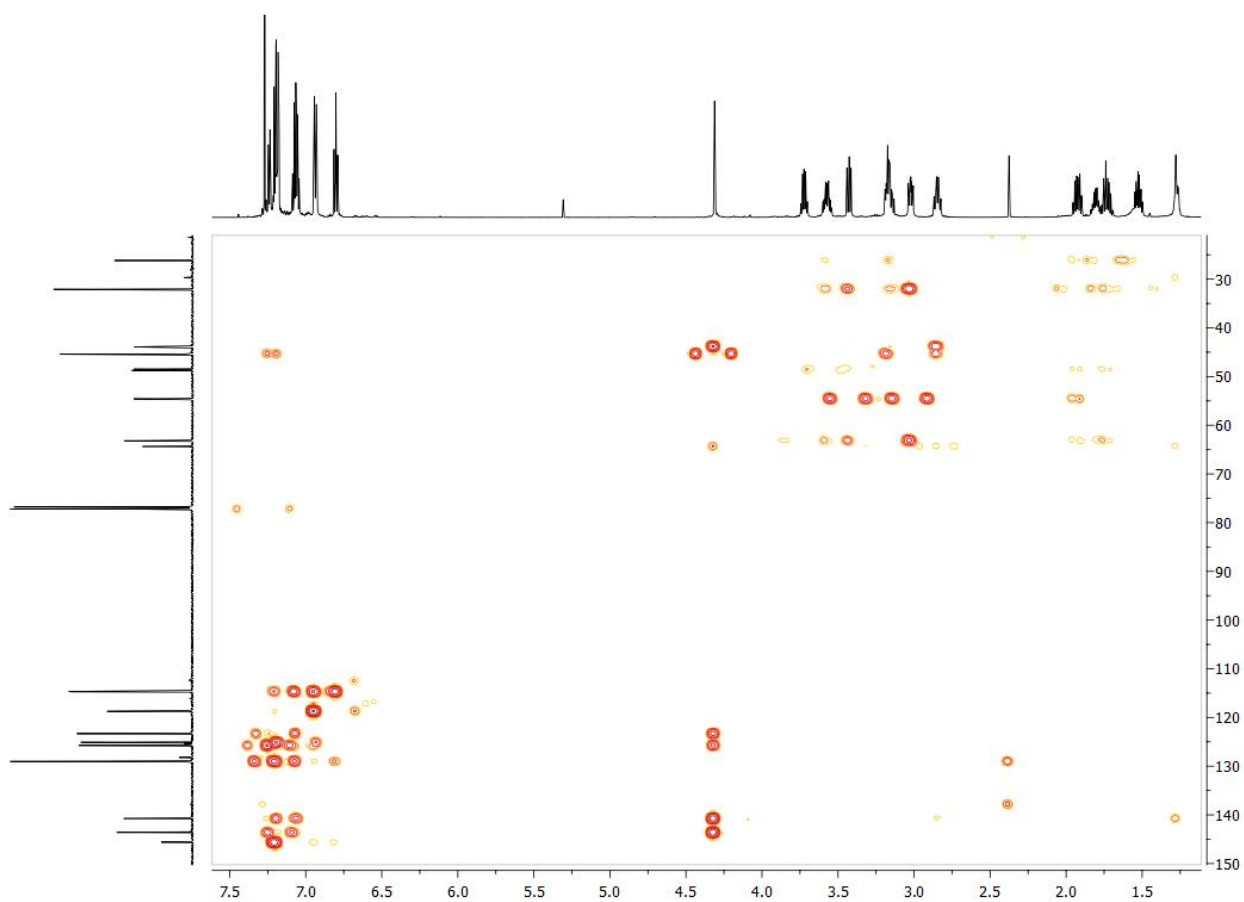

L1a,  $^1\text{H}$ - $^{13}\text{C}$  HMBC.

# NMR AND MASS SPECTRA

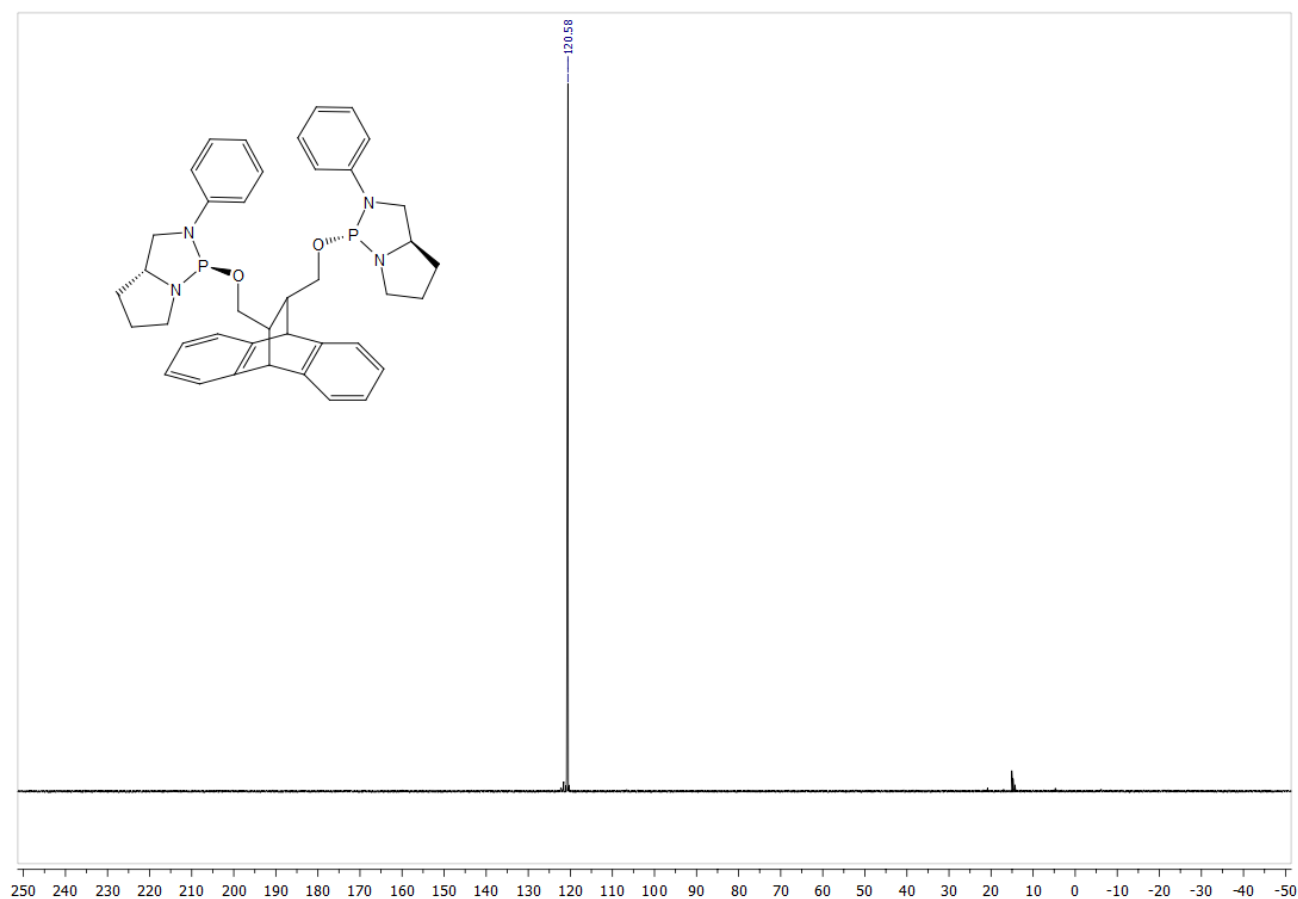

**L1b**,  $^{31}\text{P}\{^1\text{H}\}$  (242.9 MHz,  $\text{CDCl}_3$ , 30 °C).

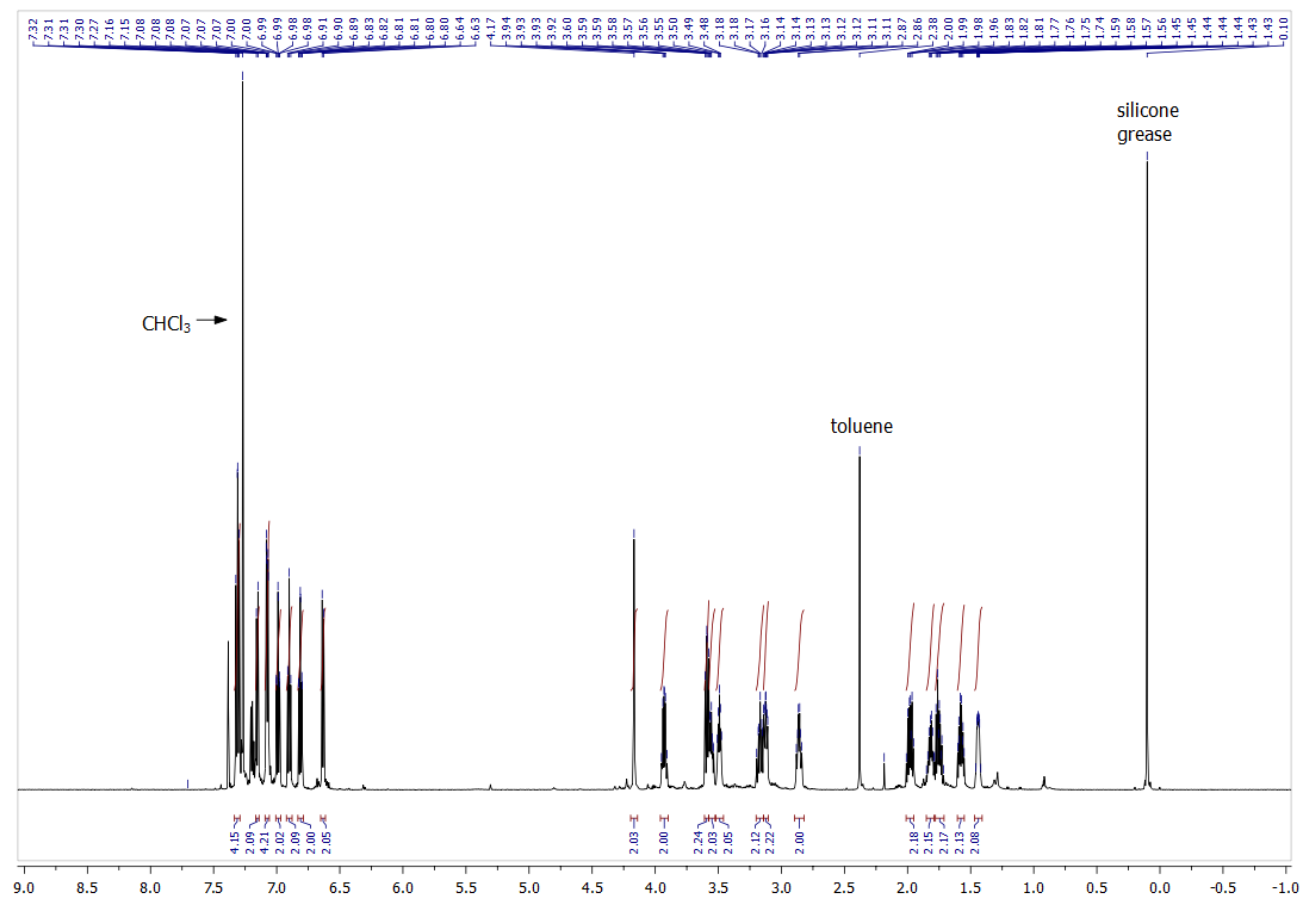

**L1b**,  $^1\text{H}$  (600.1 MHz,  $\text{CDCl}_3$ , 30 °C).



# NMR AND MASS SPECTRA

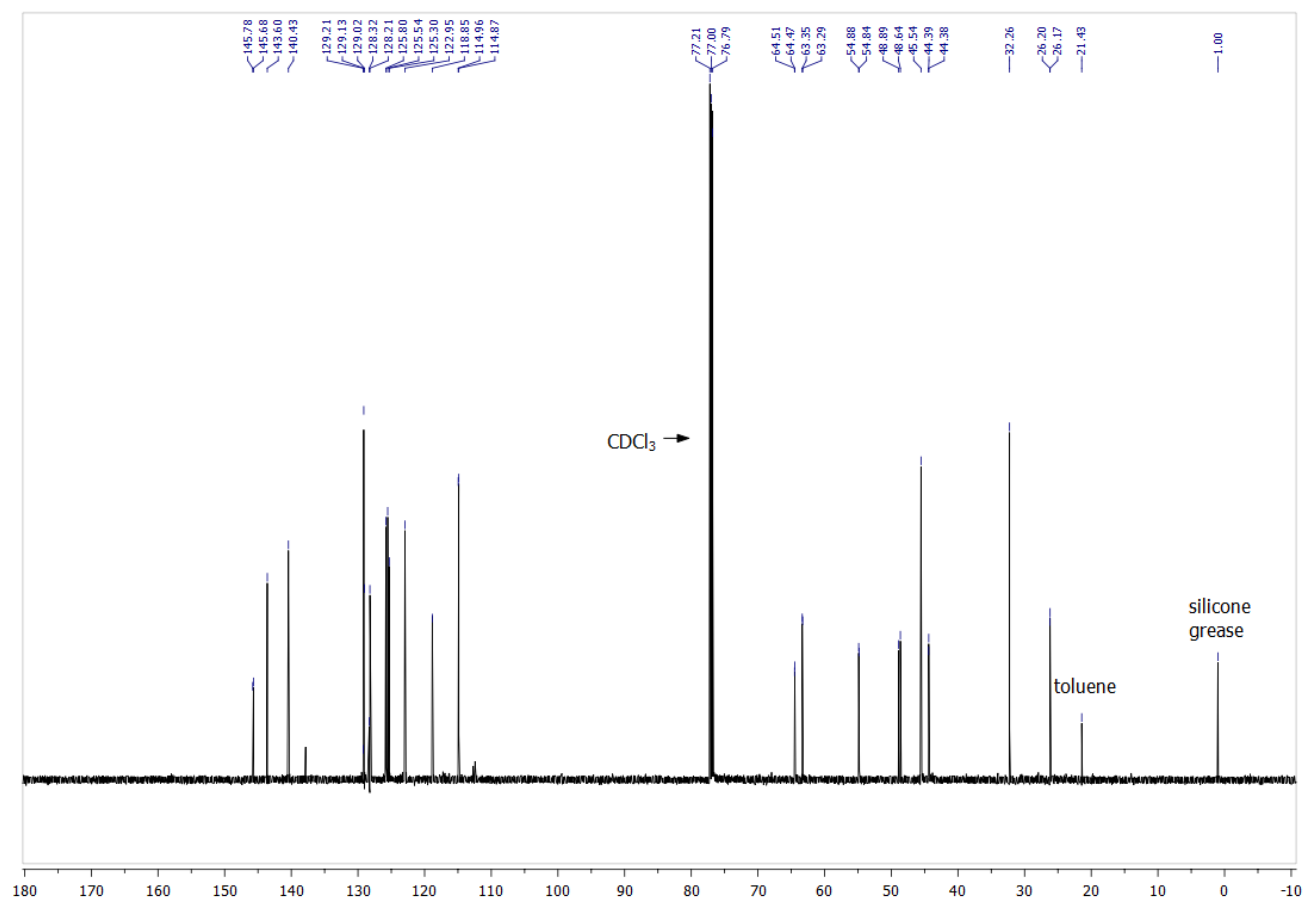

**L1b**, <sup>13</sup>C{<sup>1</sup>H} (150.9 MHz, CDCl<sub>3</sub>, 30 °C).

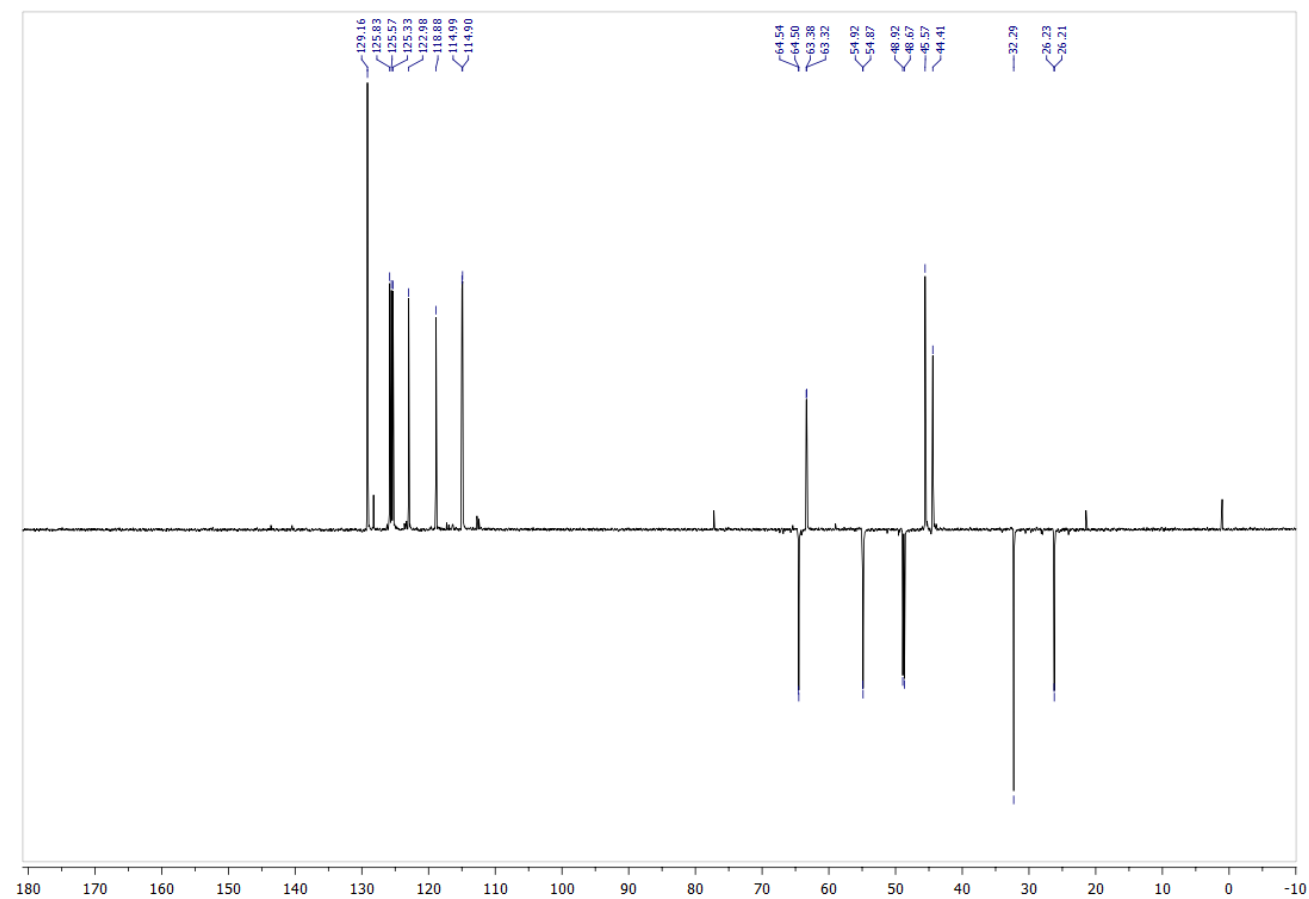

**L1b**, <sup>13</sup>C{<sup>1</sup>H} DEPT (150.9 MHz, CDCl<sub>3</sub>, 30 °C).

# NMR AND MASS SPECTRA

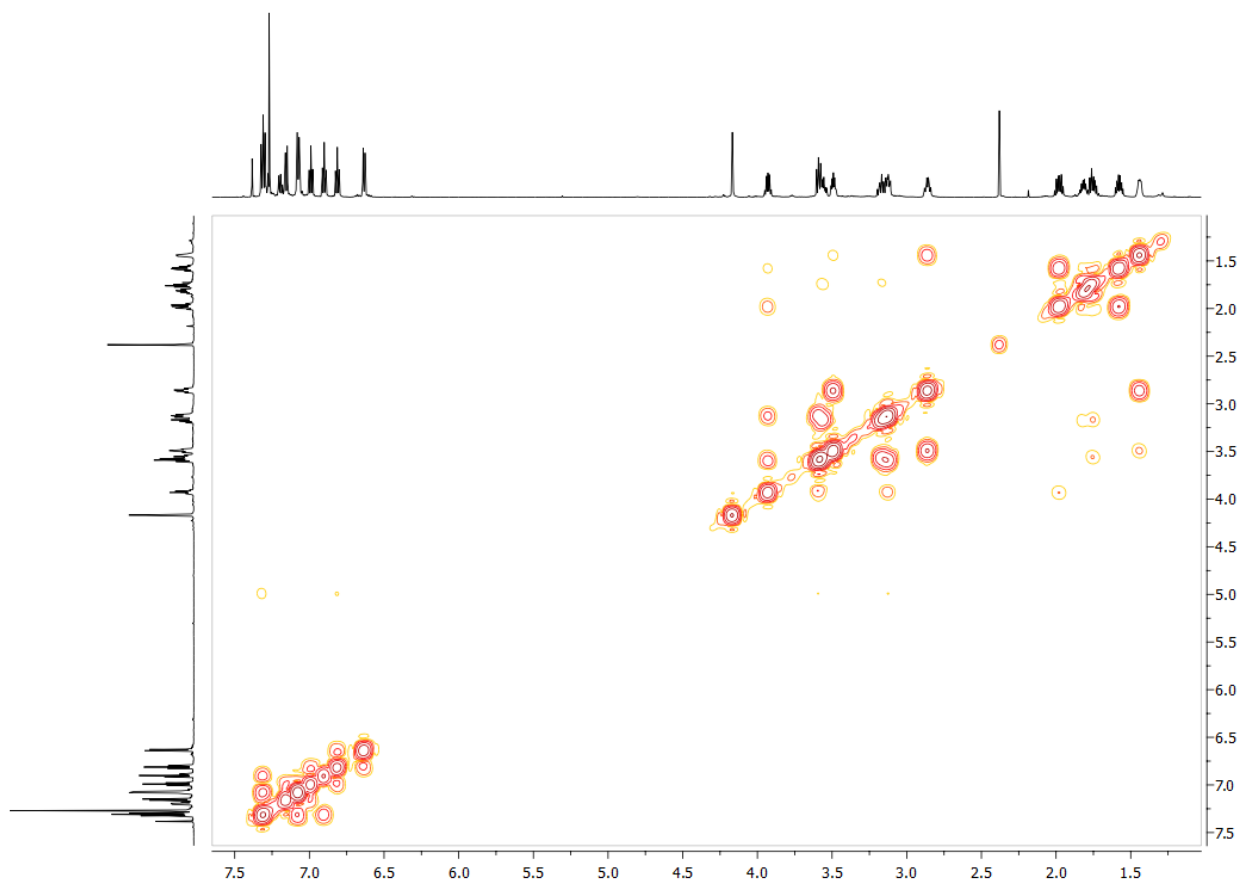

**L1b**,  $^1\text{H}$ - $^1\text{H}$  COSY.

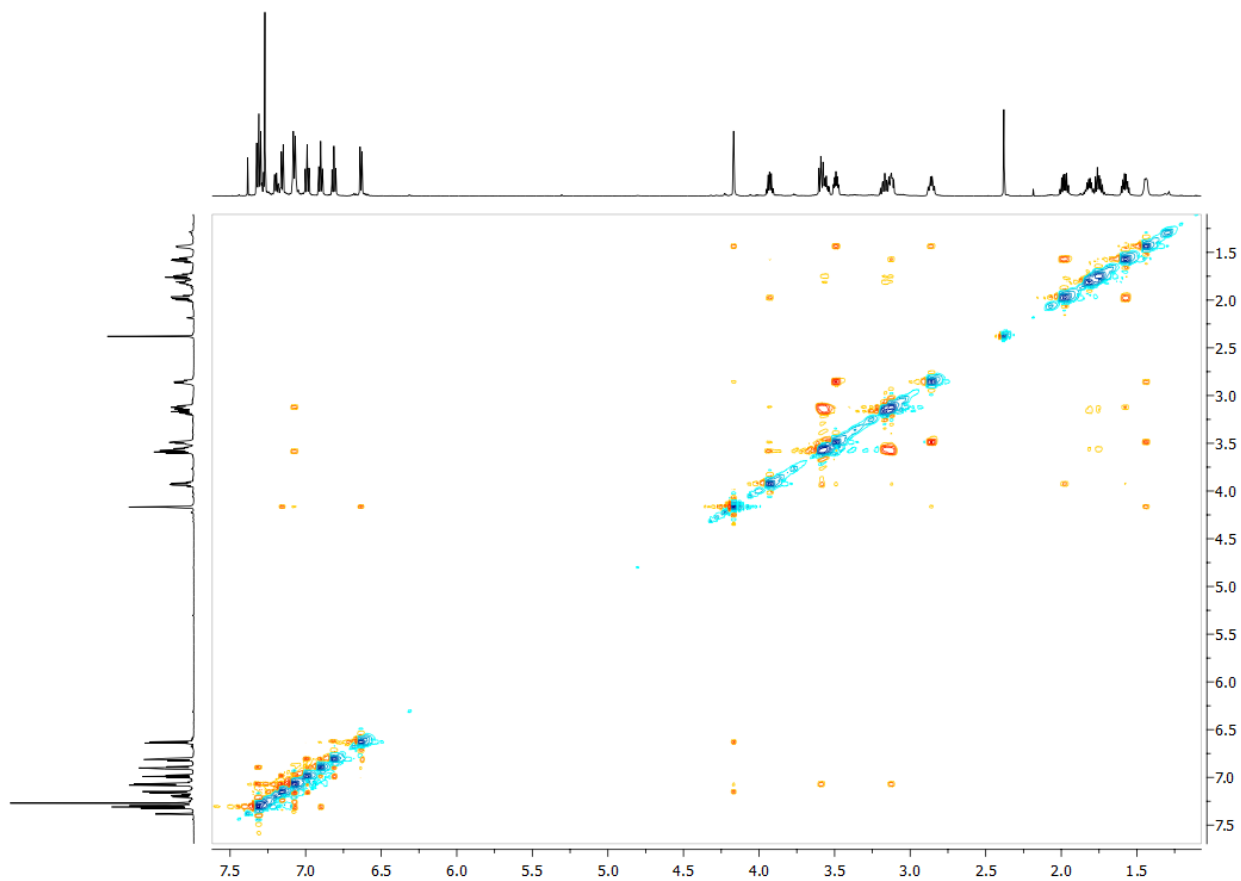

**L1b**,  $^1\text{H}$ - $^1\text{H}$  NOESY.

# NMR AND MASS SPECTRA

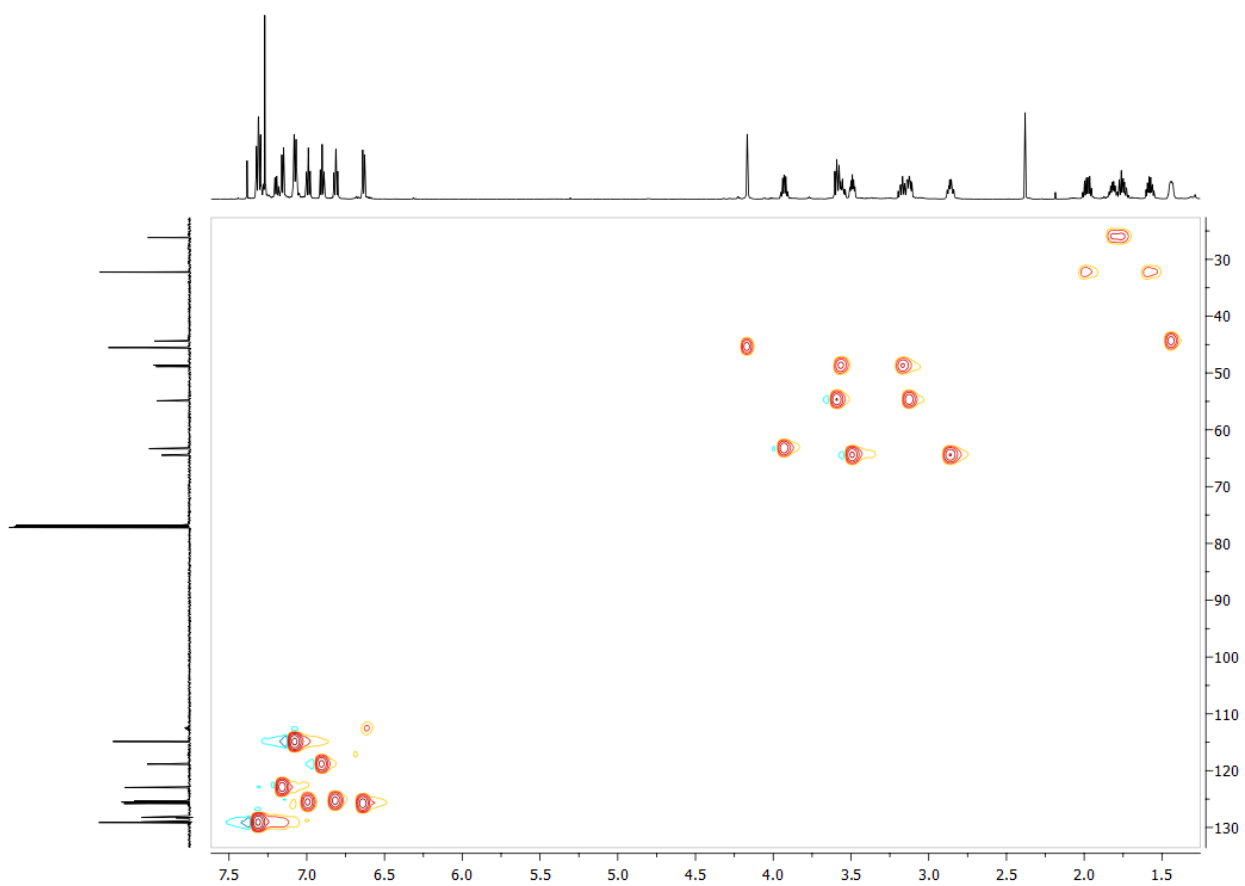

**L1b**,  $^1\text{H}$ - $^{13}\text{C}$  HSQC.

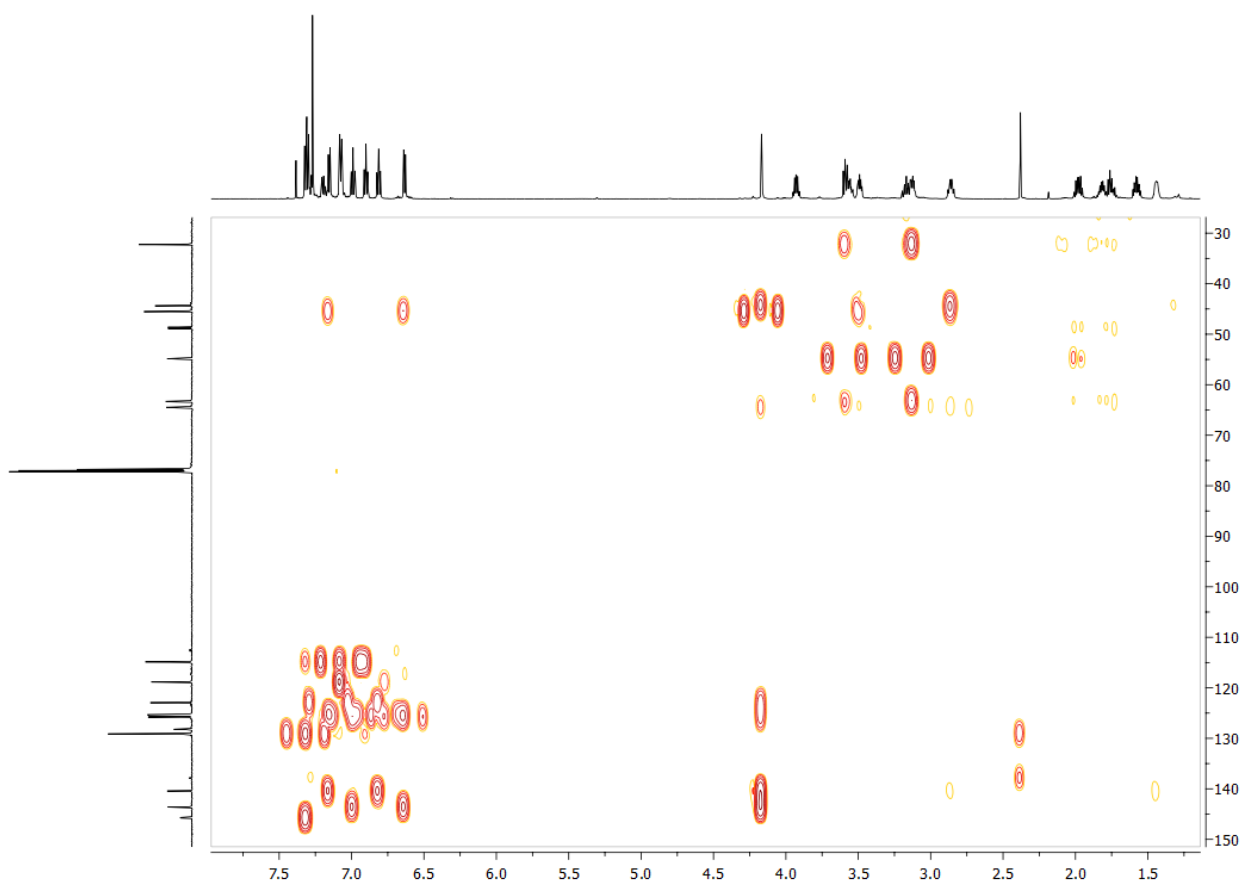

**L1b**,  $^1\text{H}$ - $^{13}\text{C}$  HMBC.

# NMR AND MASS SPECTRA

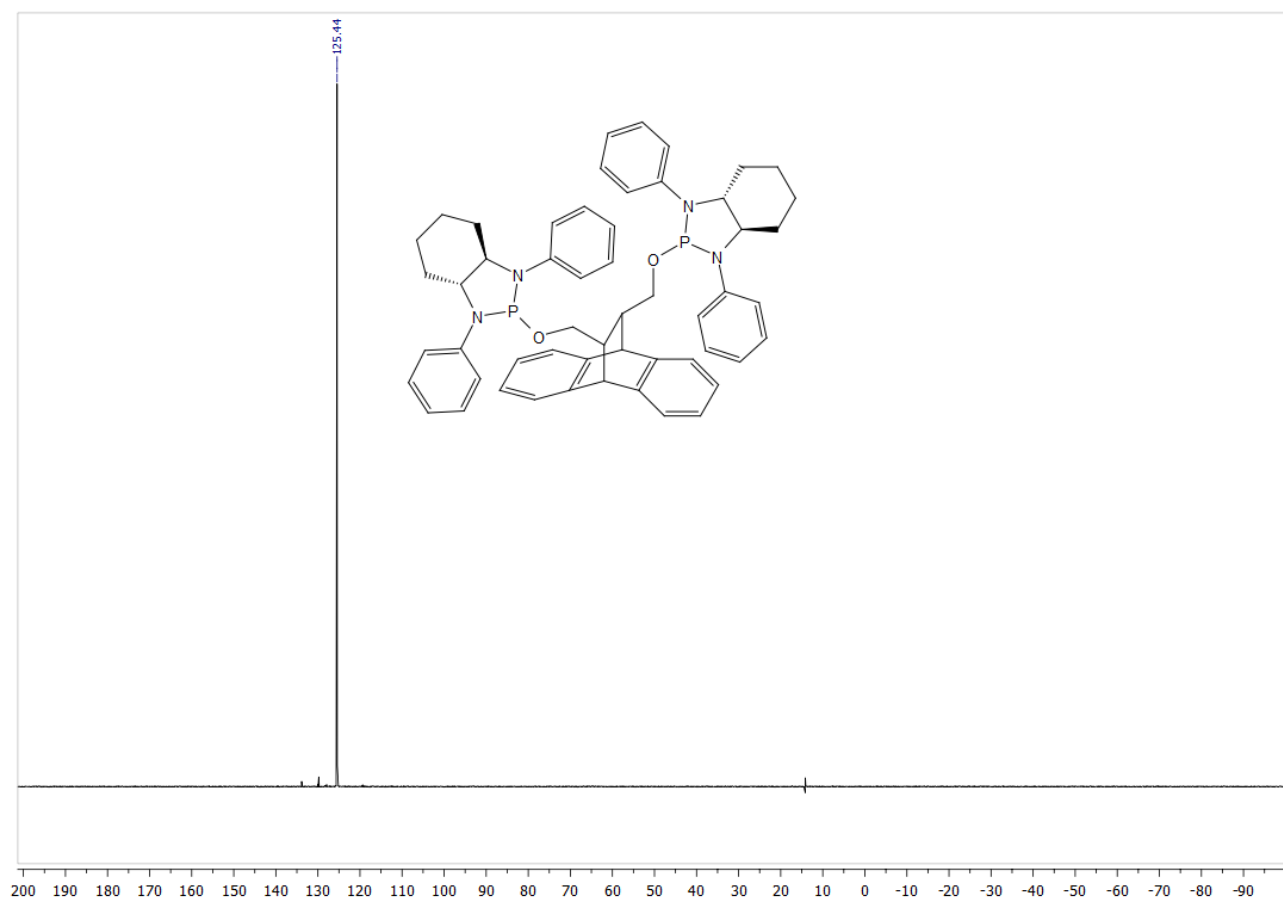

**L2a**,  $^{31}\text{P}\{^1\text{H}\}$  (242.9 MHz,  $\text{CDCl}_3$ , 30 °C).

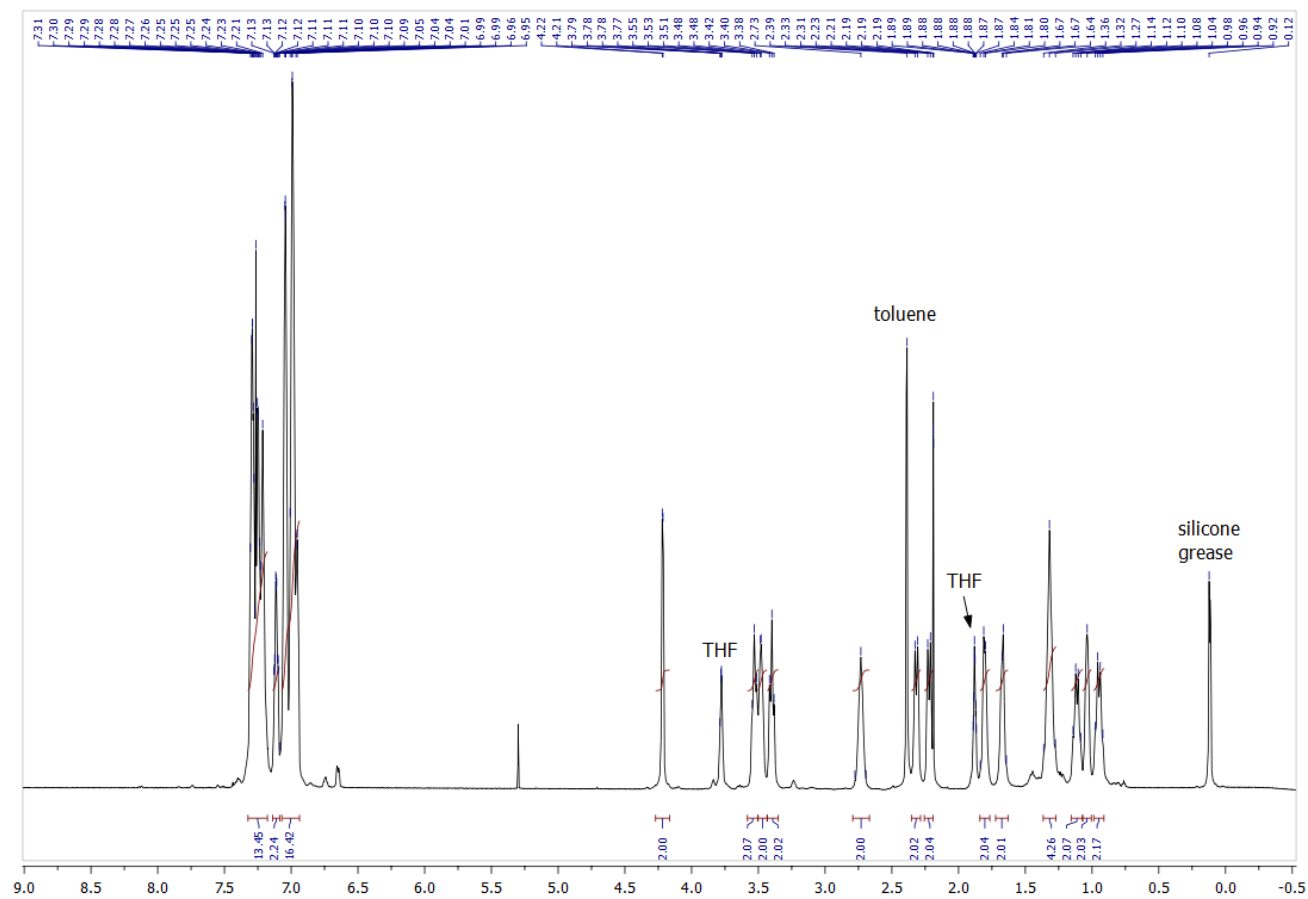

**L2a**,  $^1\text{H}$  (600.1 MHz,  $\text{CDCl}_3$ , 30 °C).

# NMR AND MASS SPECTRA

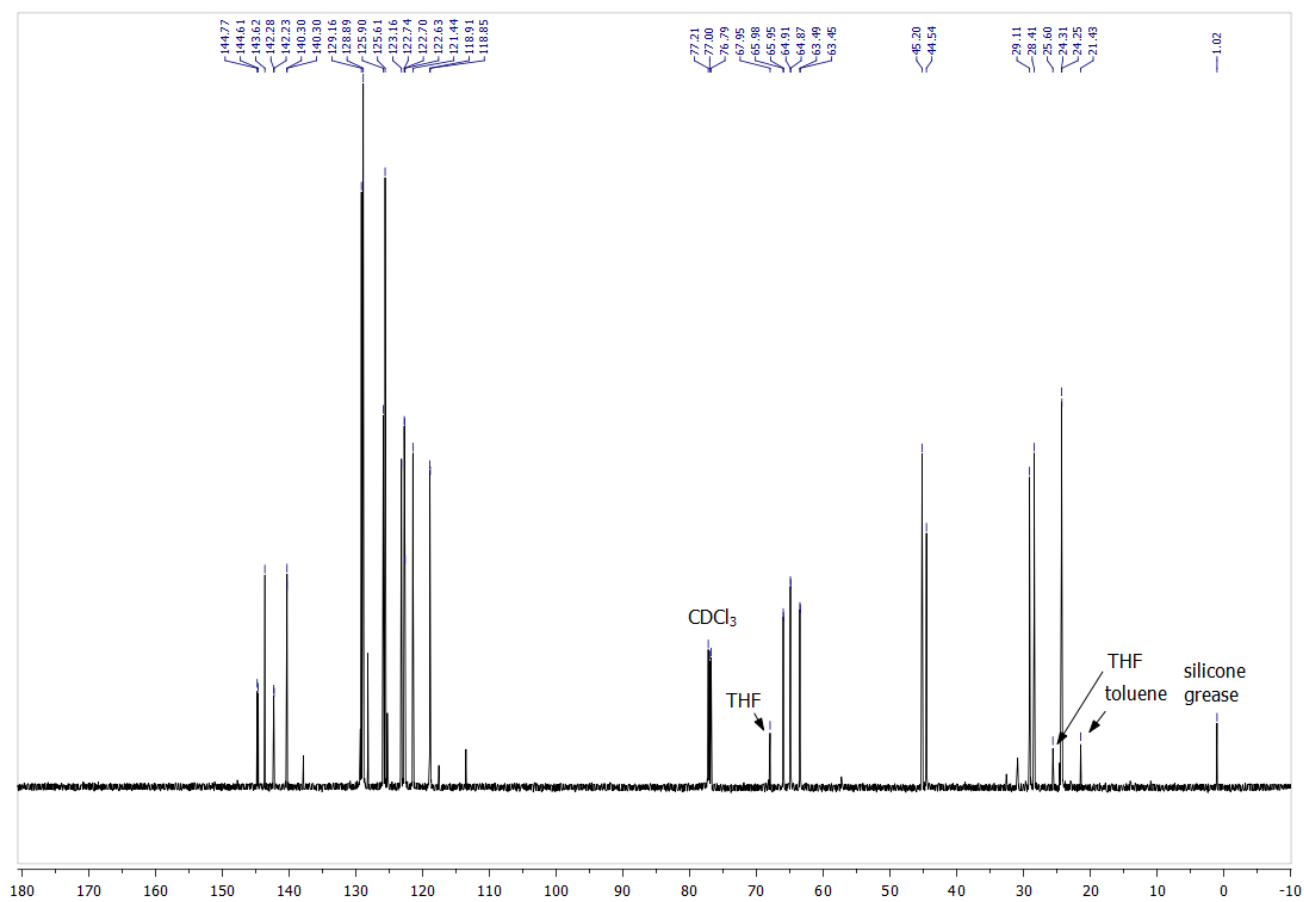

**L2a**, <sup>13</sup>C{<sup>1</sup>H} (150.9 MHz, CDCl<sub>3</sub>, 30 °C).

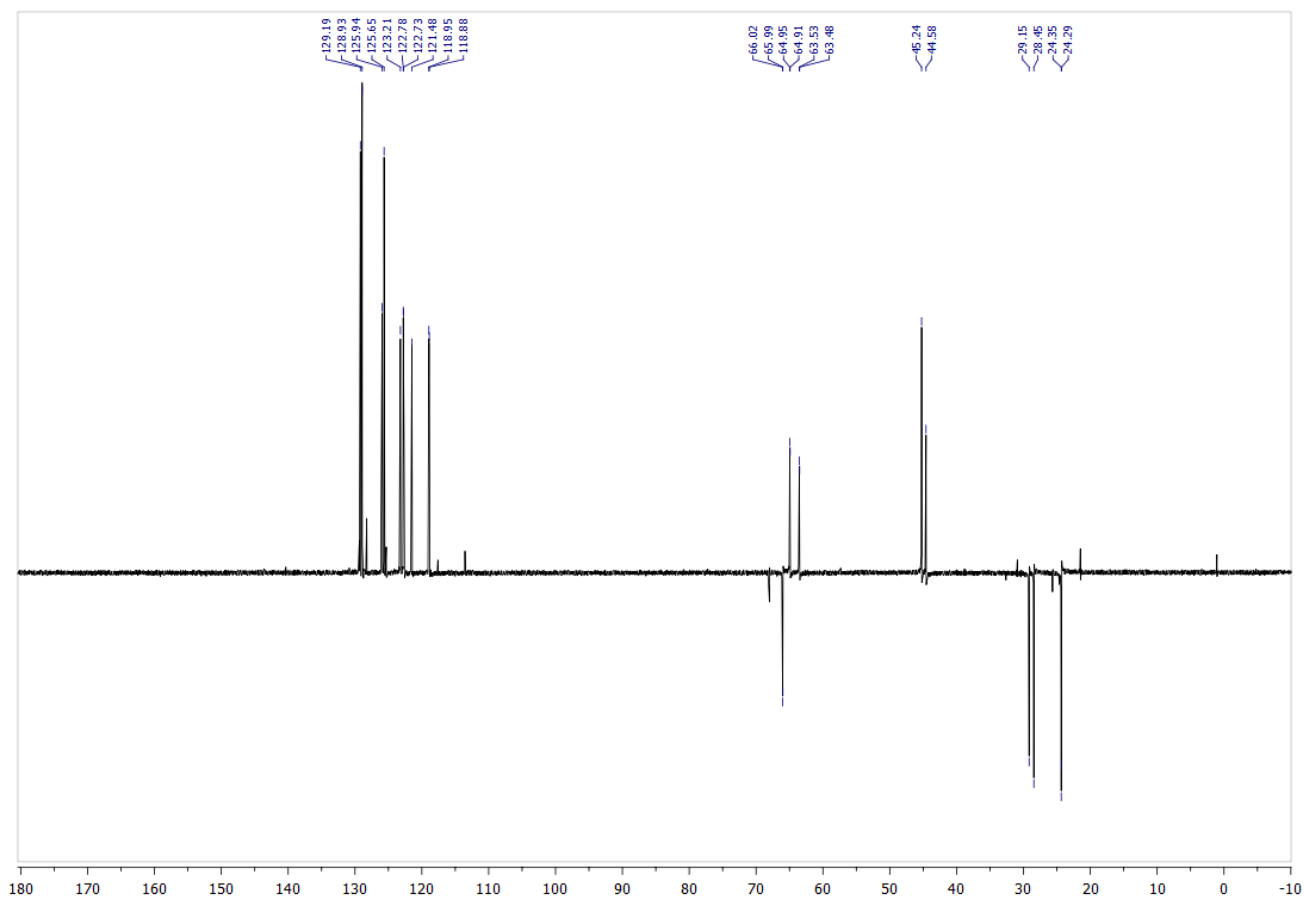

**L2a**, <sup>13</sup>C{<sup>1</sup>H} DEPT (150.9 MHz, CDCl<sub>3</sub>, 30 °C).

# NMR AND MASS SPECTRA

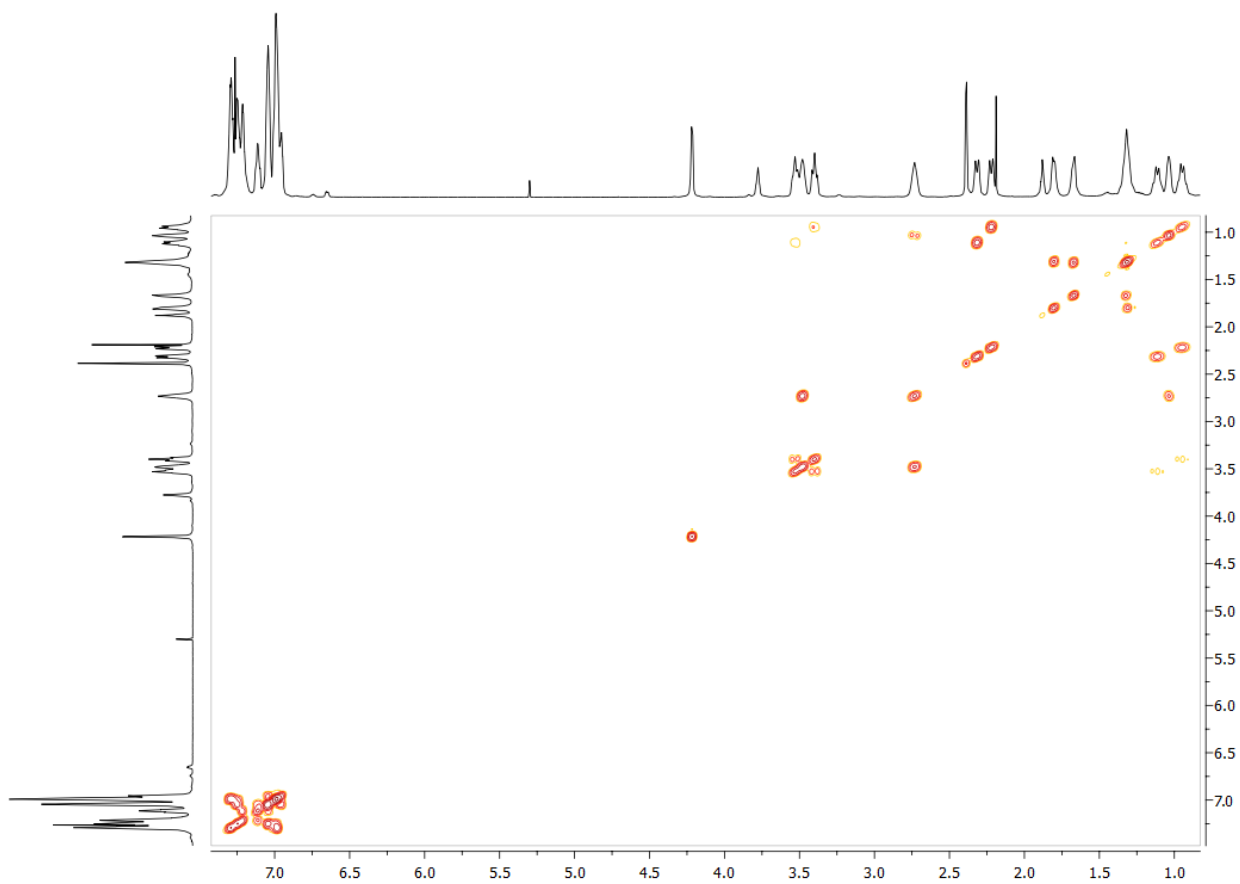

L2a,  $^1\text{H}$ - $^1\text{H}$  COSY.

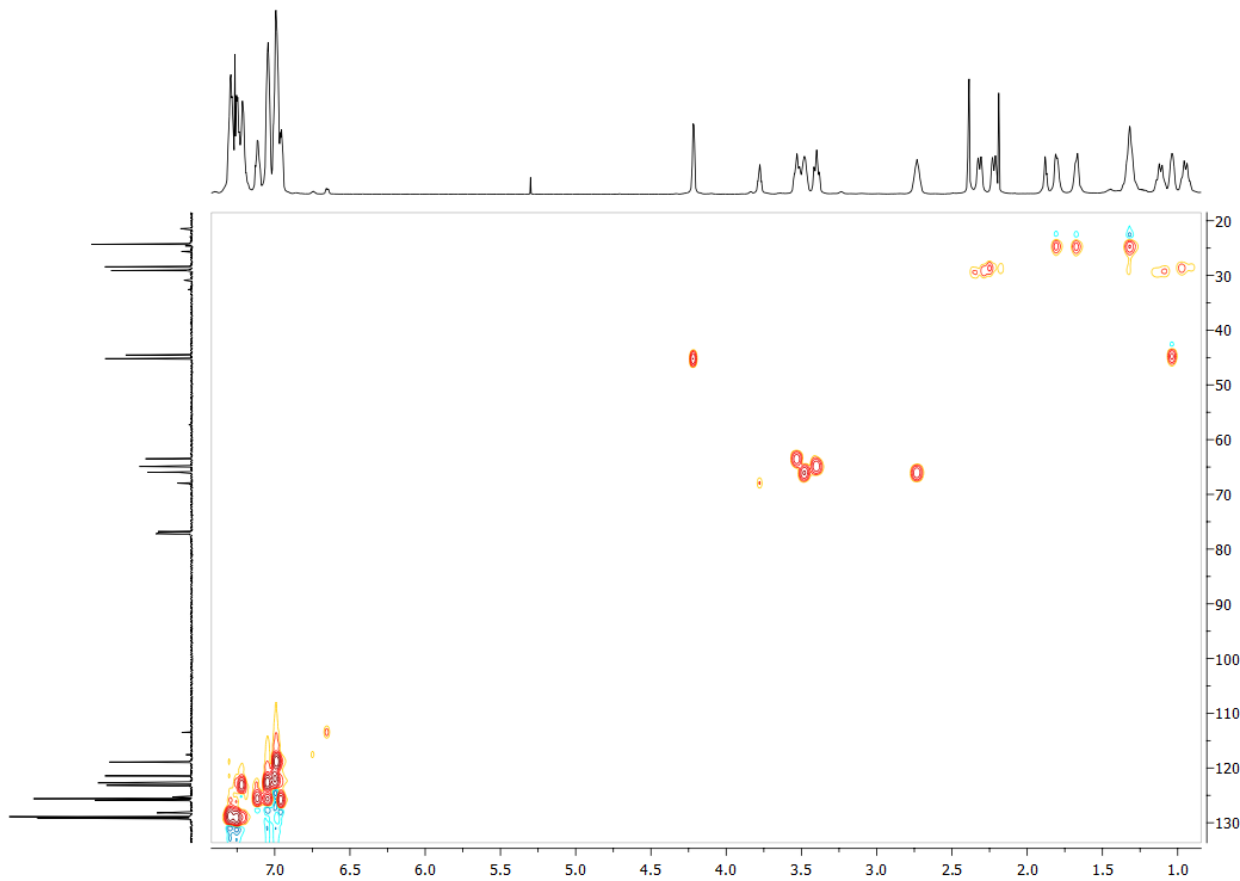

L2a,  $^1\text{H}$ - $^{13}\text{C}$  HSQC.

# NMR AND MASS SPECTRA

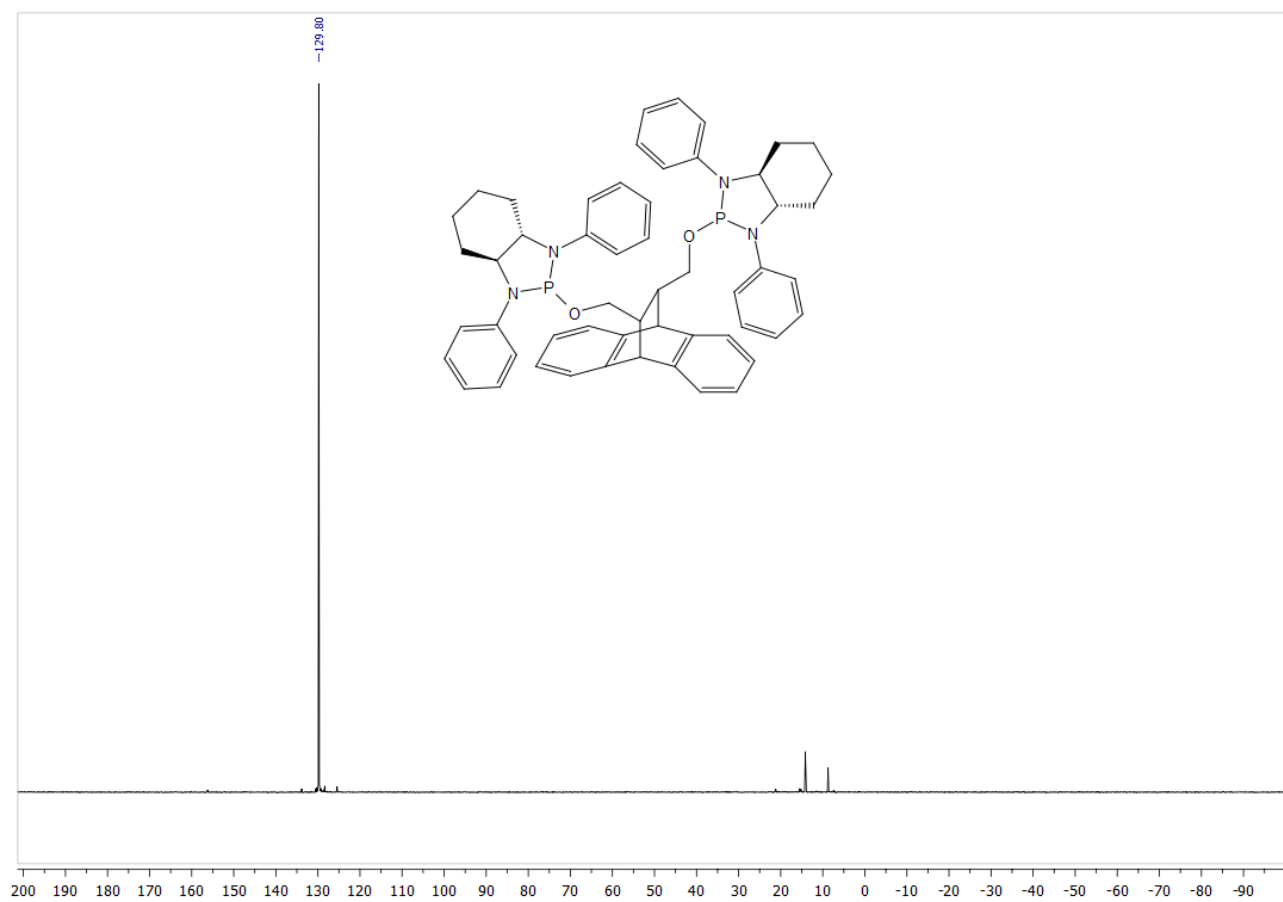

**L2b**,  $^{31}\text{P}\{^1\text{H}\}$  (242.9 MHz,  $\text{CDCl}_3$ , 30 °C).

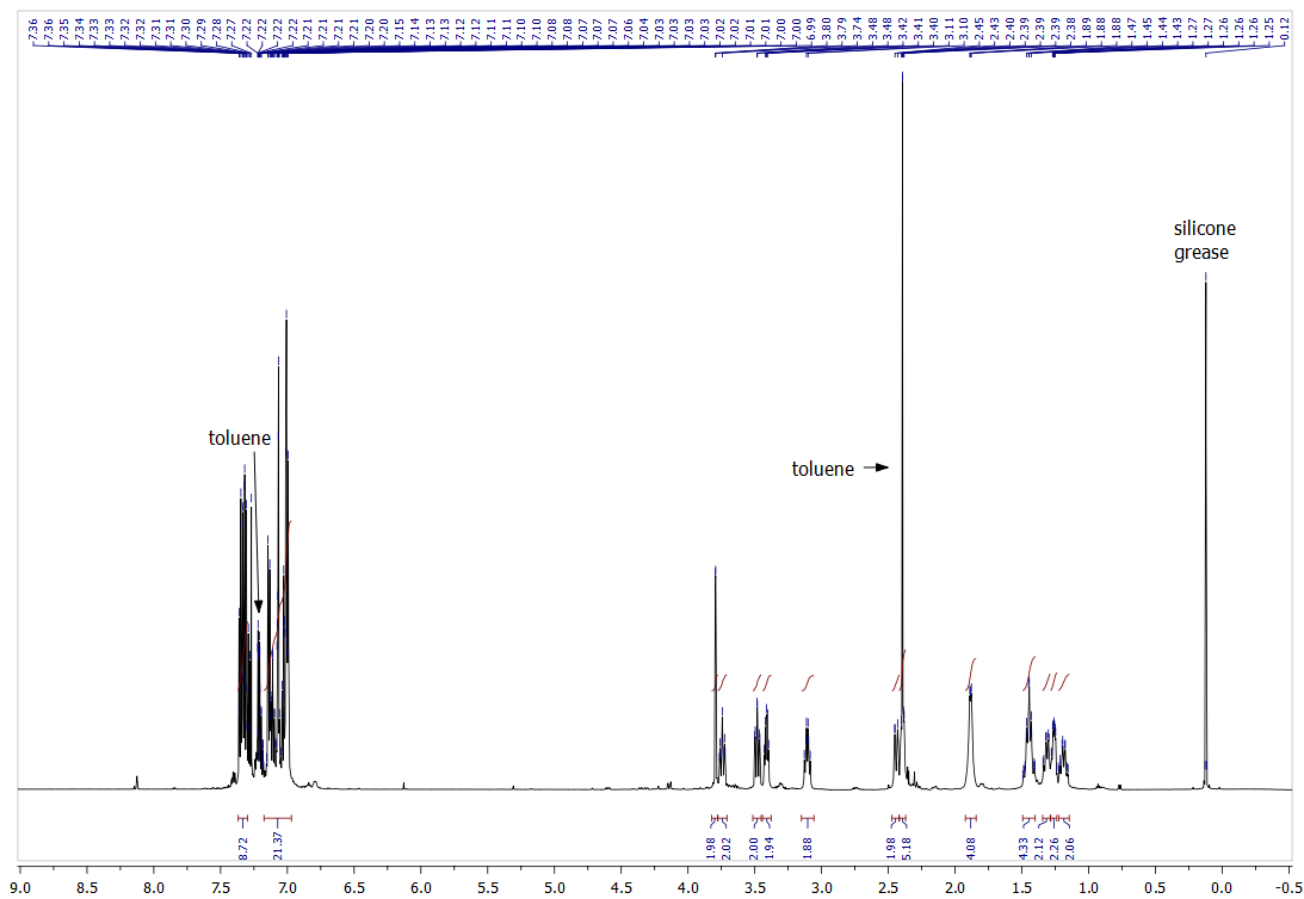

**L2b**,  $^1\text{H}$  (600.1 MHz,  $\text{CDCl}_3$ , 30 °C).

# NMR AND MASS SPECTRA

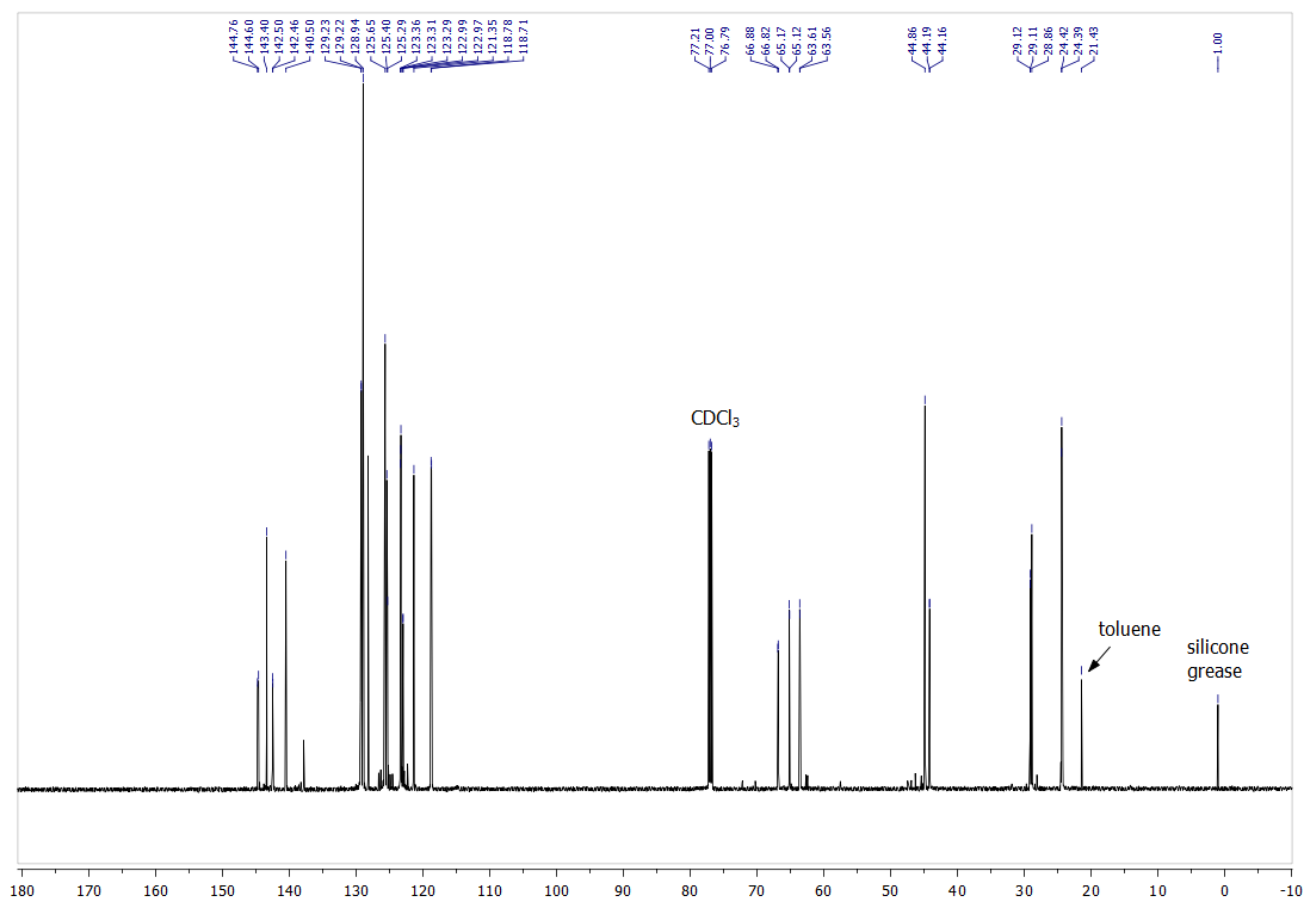

**L2b**, <sup>13</sup>C{<sup>1</sup>H} (150.9 MHz, CDCl<sub>3</sub>, 30 °C).

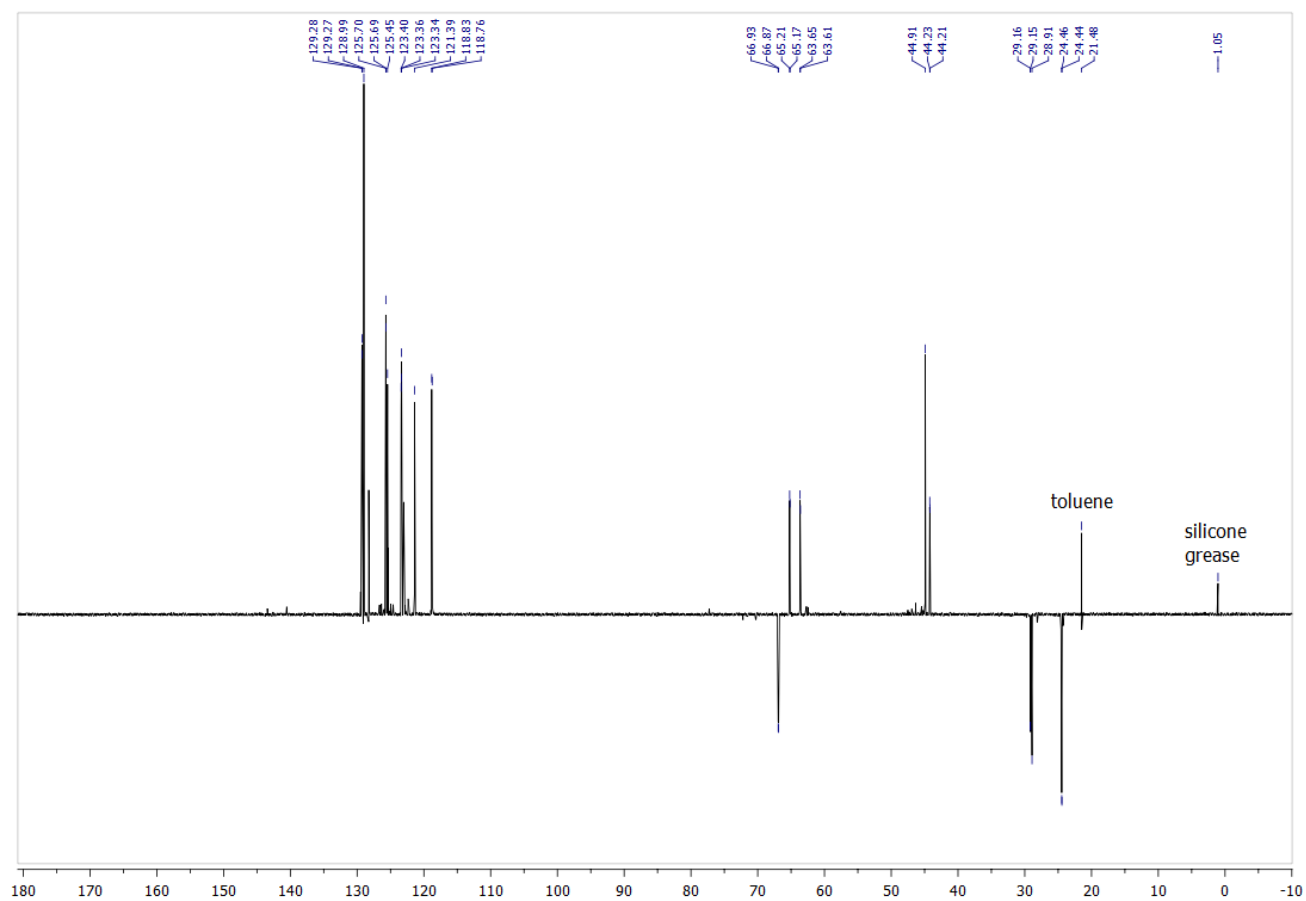

**L2b**, <sup>13</sup>C{<sup>1</sup>H} DEPT (150.9 MHz, CDCl<sub>3</sub>, 30 °C).



# NMR AND MASS SPECTRA

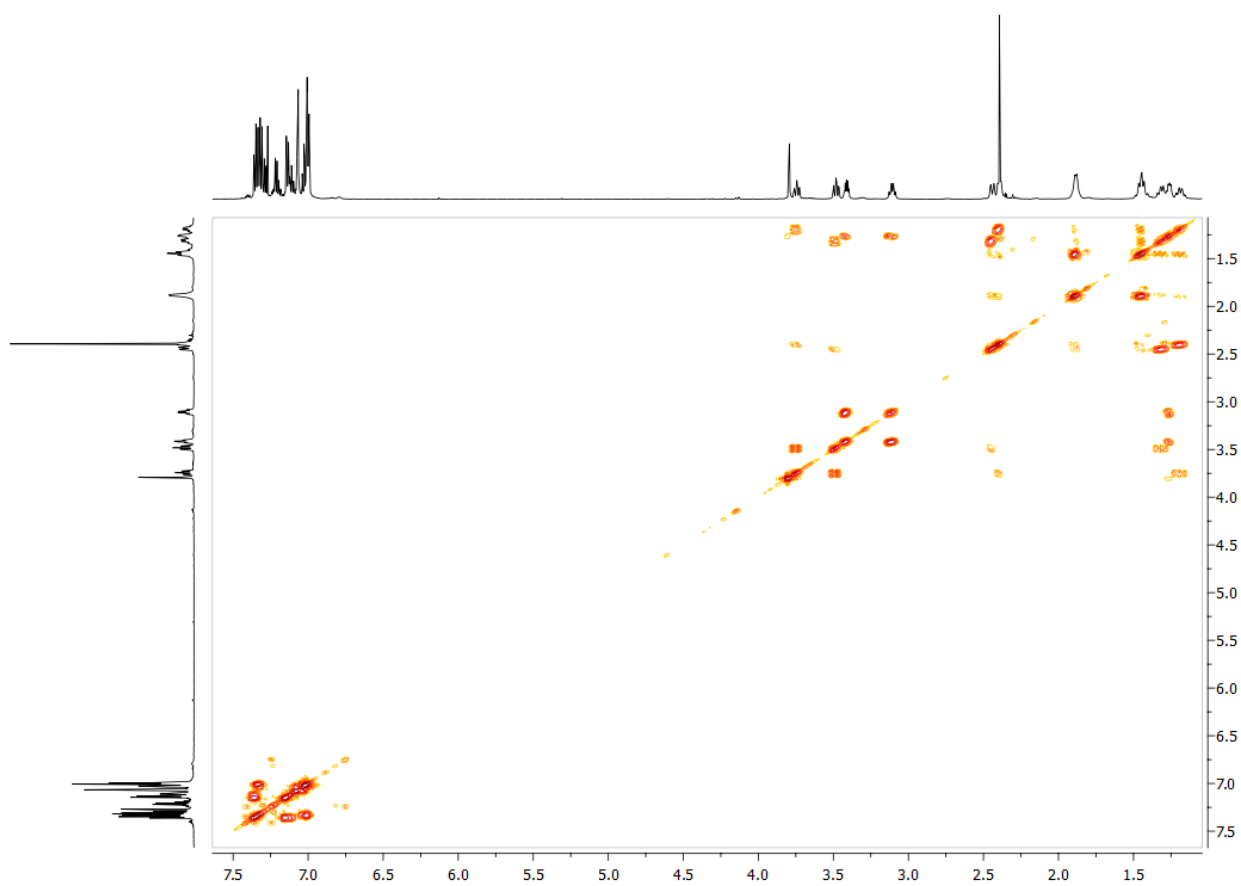

L2b,  $^1\text{H}$ - $^1\text{H}$  COSY.

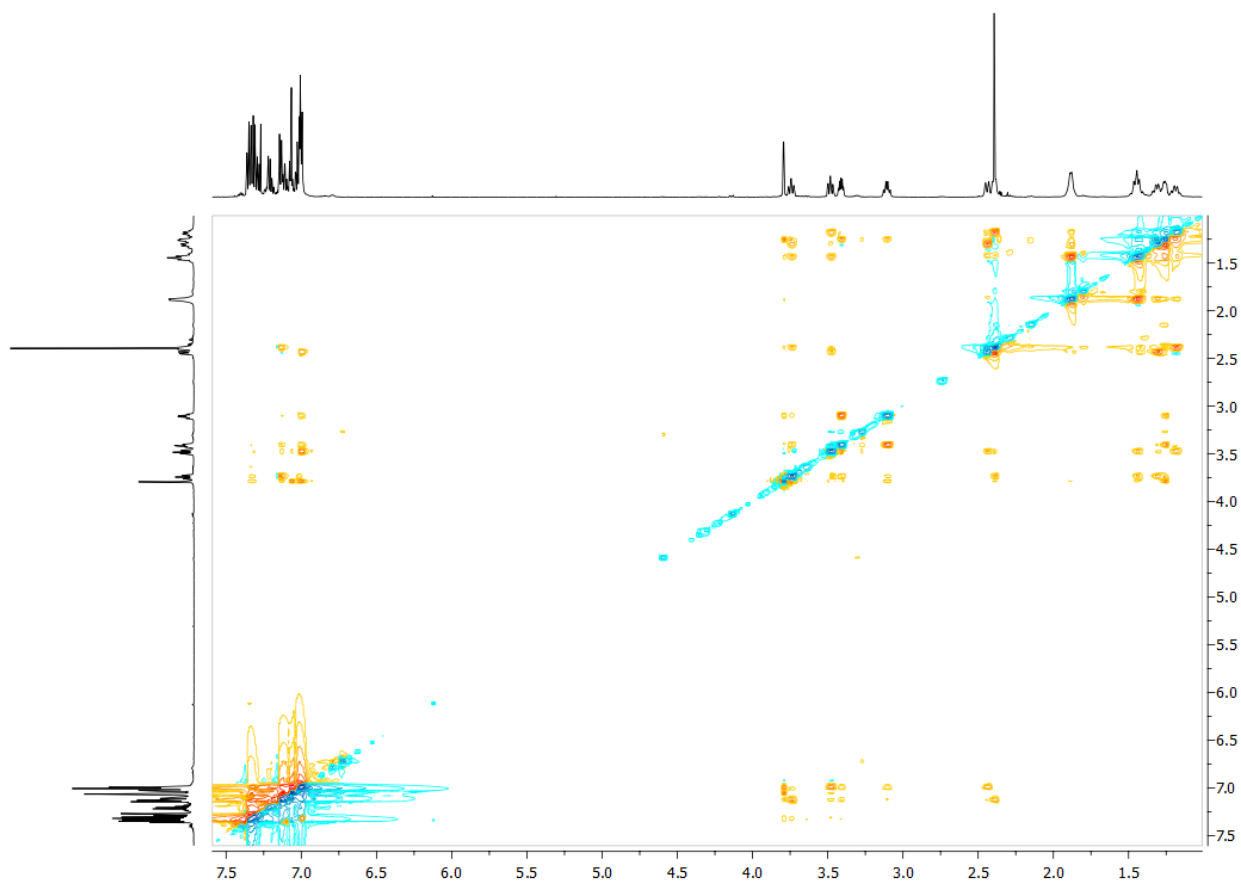

L2b,  $^1\text{H}$ - $^1\text{H}$  NOESY.

# NMR AND MASS SPECTRA

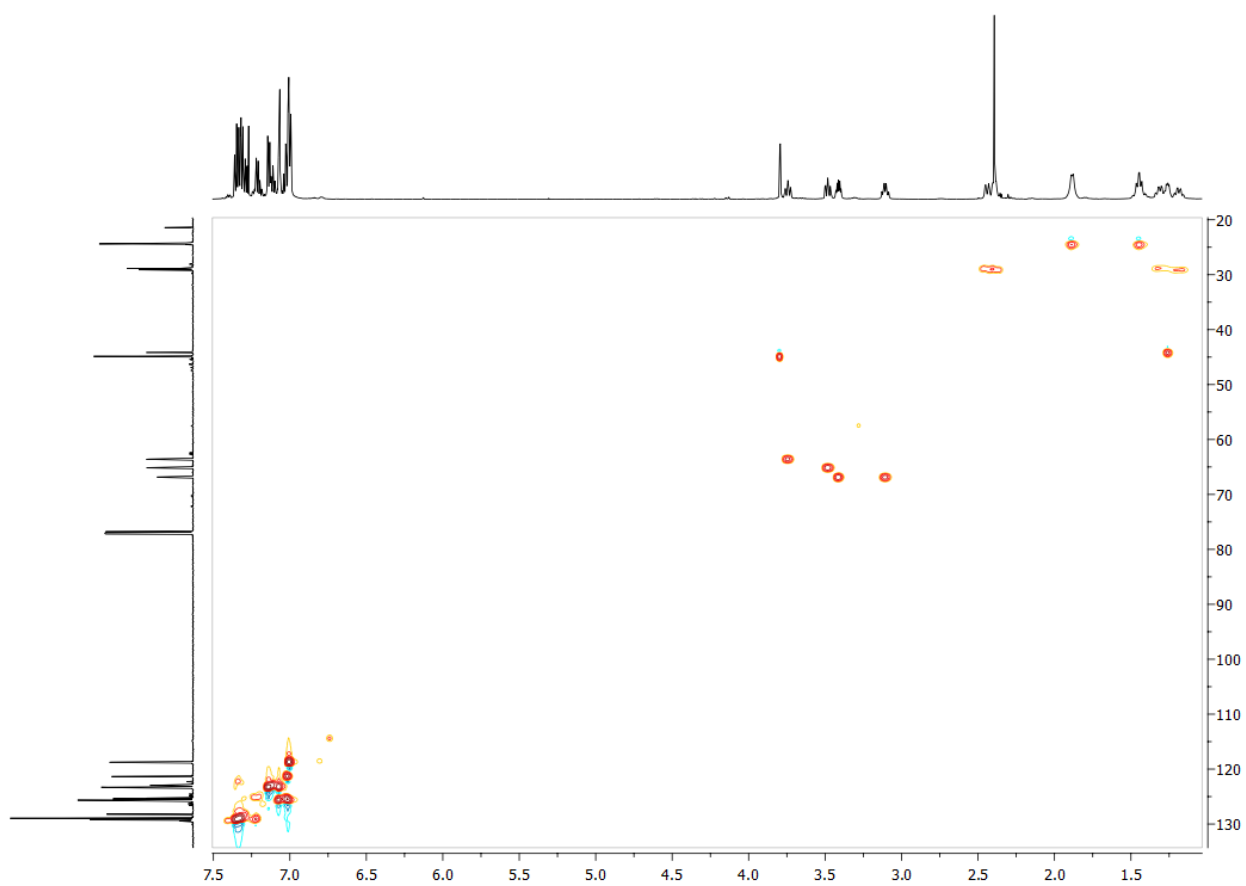

L2b,  $^1\text{H}$ - $^{13}\text{C}$  HSQC.

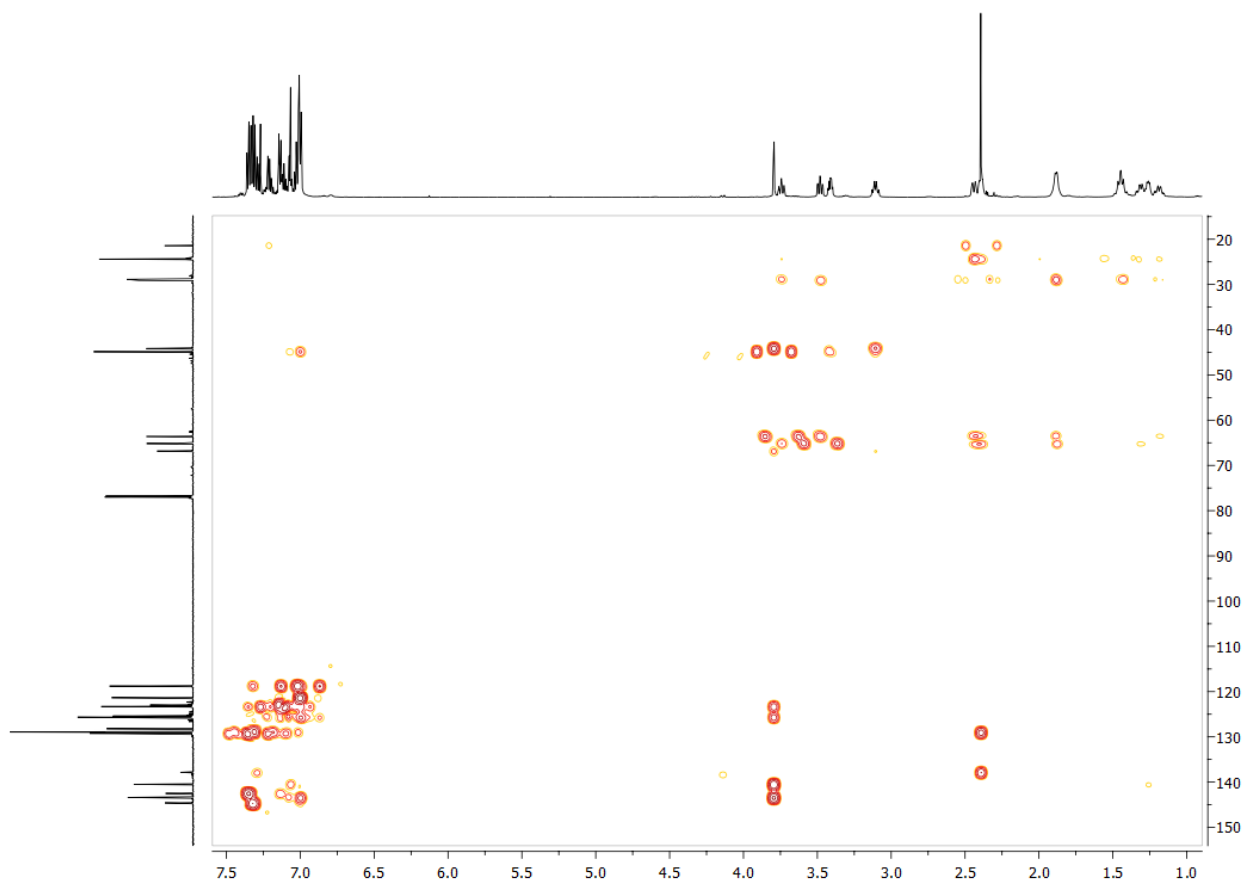

L2b,  $^1\text{H}$ - $^{13}\text{C}$  HMBC.

# NMR AND MASS SPECTRA

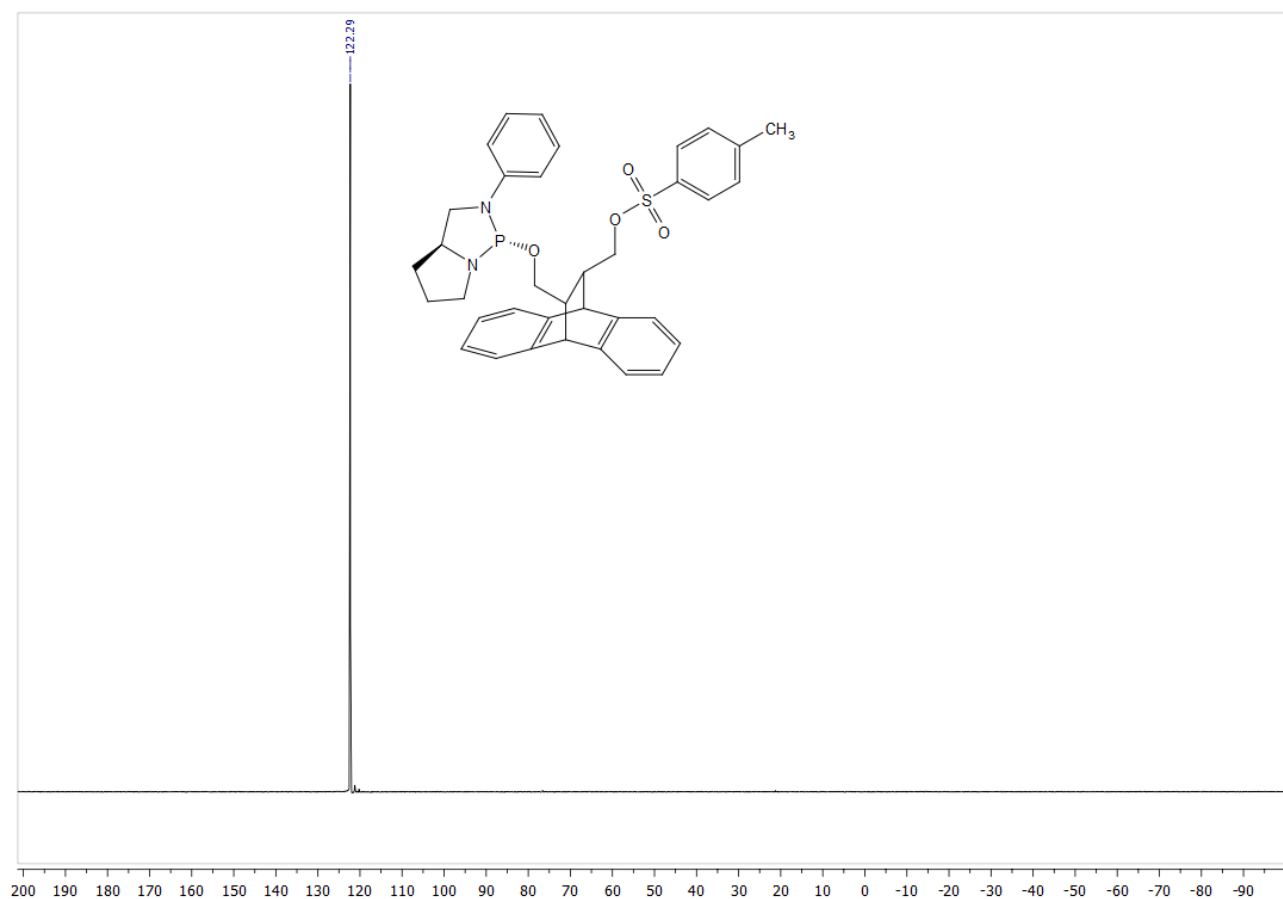

L3a,  $^{31}\text{P}\{^1\text{H}\}$  (242.9 MHz,  $\text{CDCl}_3$ , 30 °C).

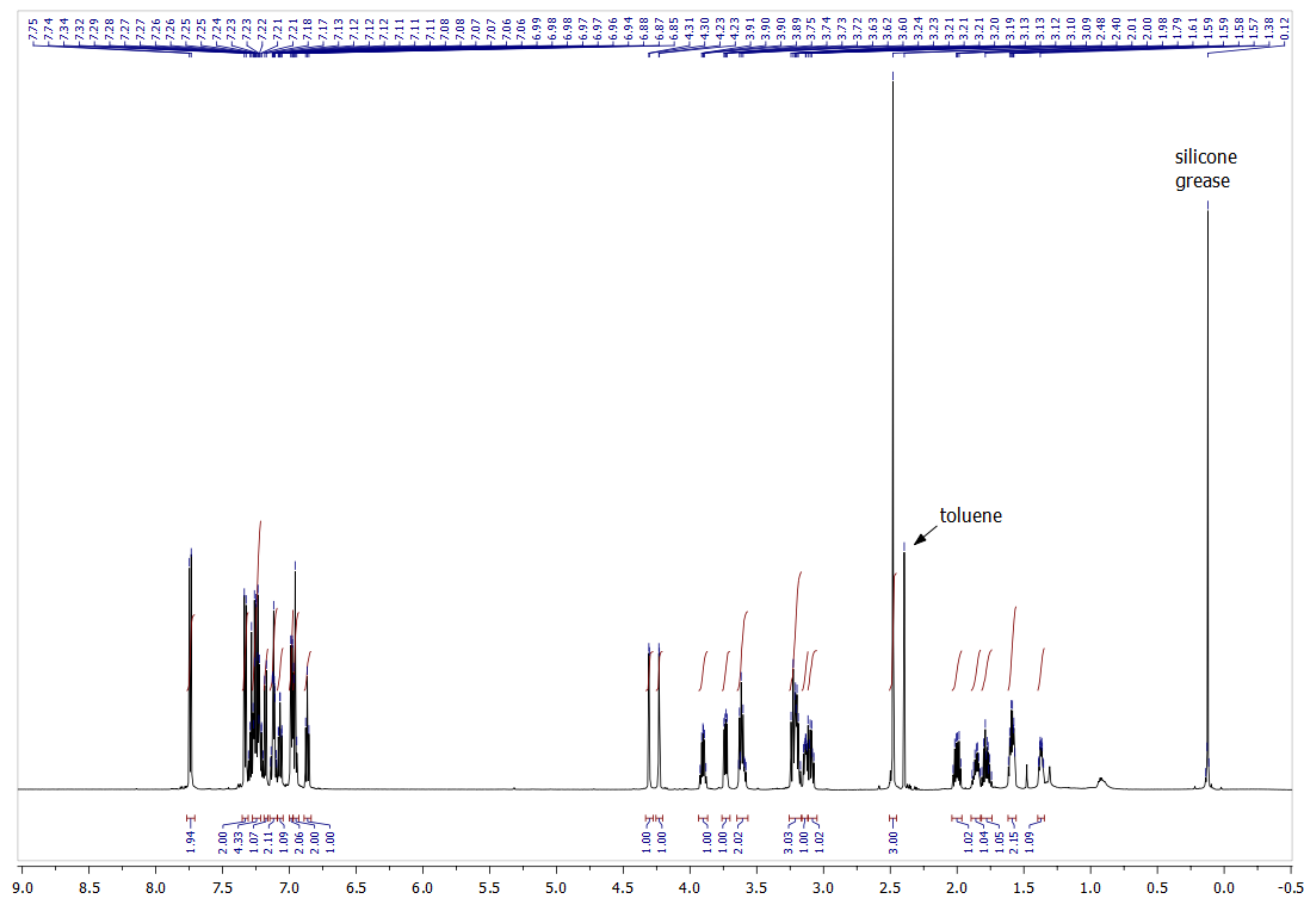

L3a,  $^1\text{H}$  (600.1 MHz,  $\text{CDCl}_3$ , 30 °C).

# NMR AND MASS SPECTRA

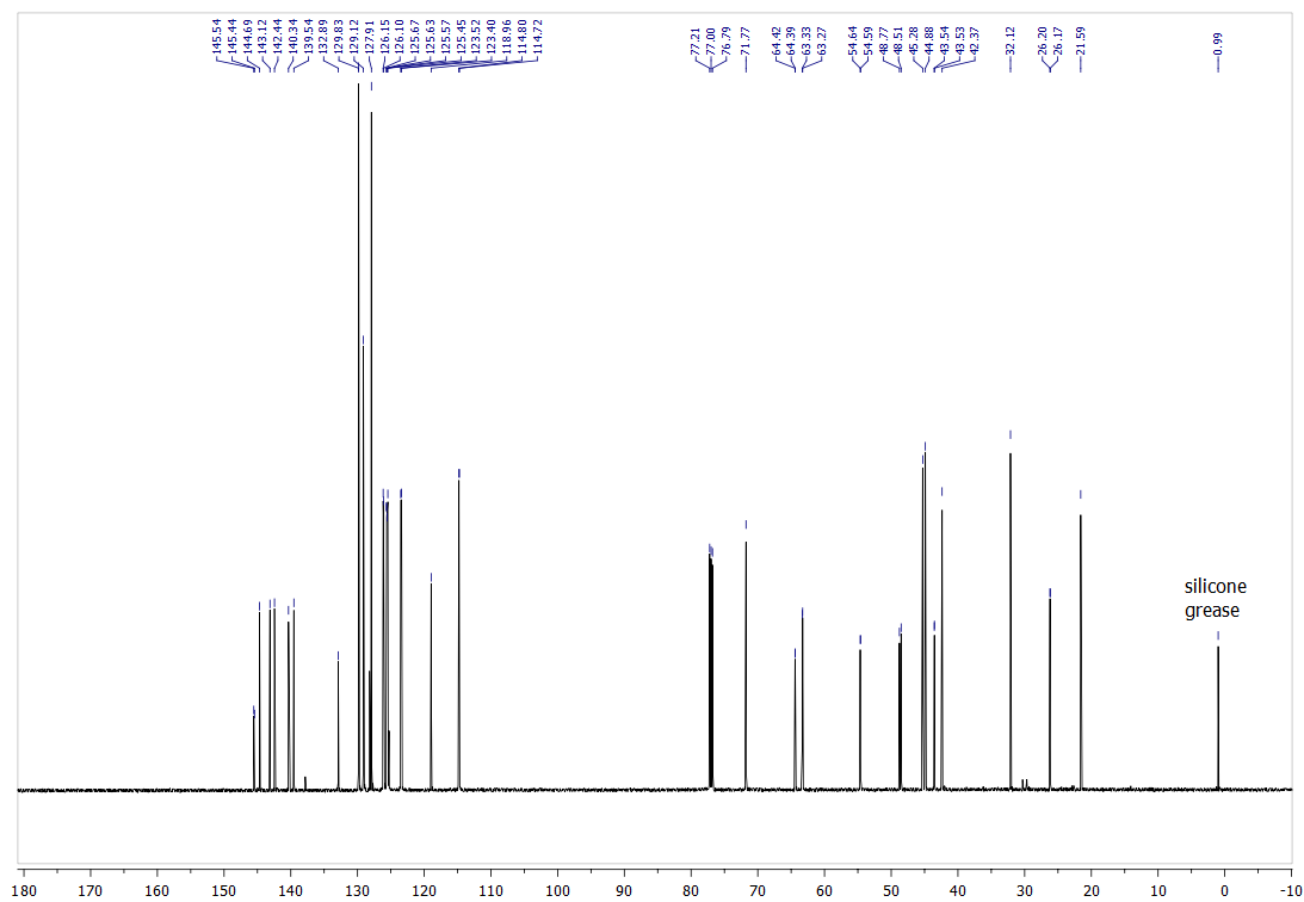

**L3a**,  $^{13}\text{C}\{^1\text{H}\}$  (150.9 MHz,  $\text{CDCl}_3$ , 30 °C).

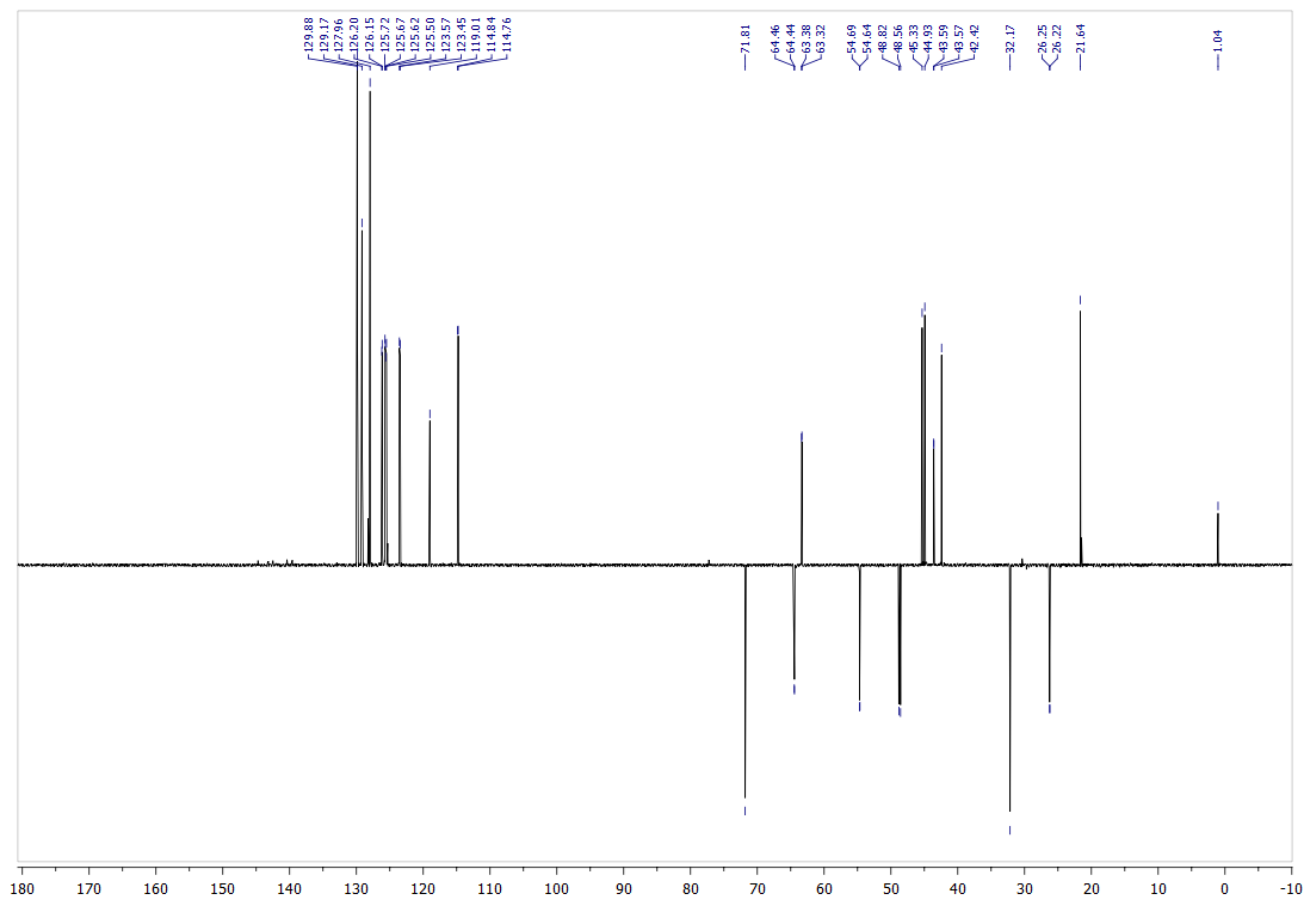

**L3a**,  $^{13}\text{C}\{^1\text{H}\}$  DEPT (150.9 MHz,  $\text{CDCl}_3$ , 30 °C).

# NMR AND MASS SPECTRA

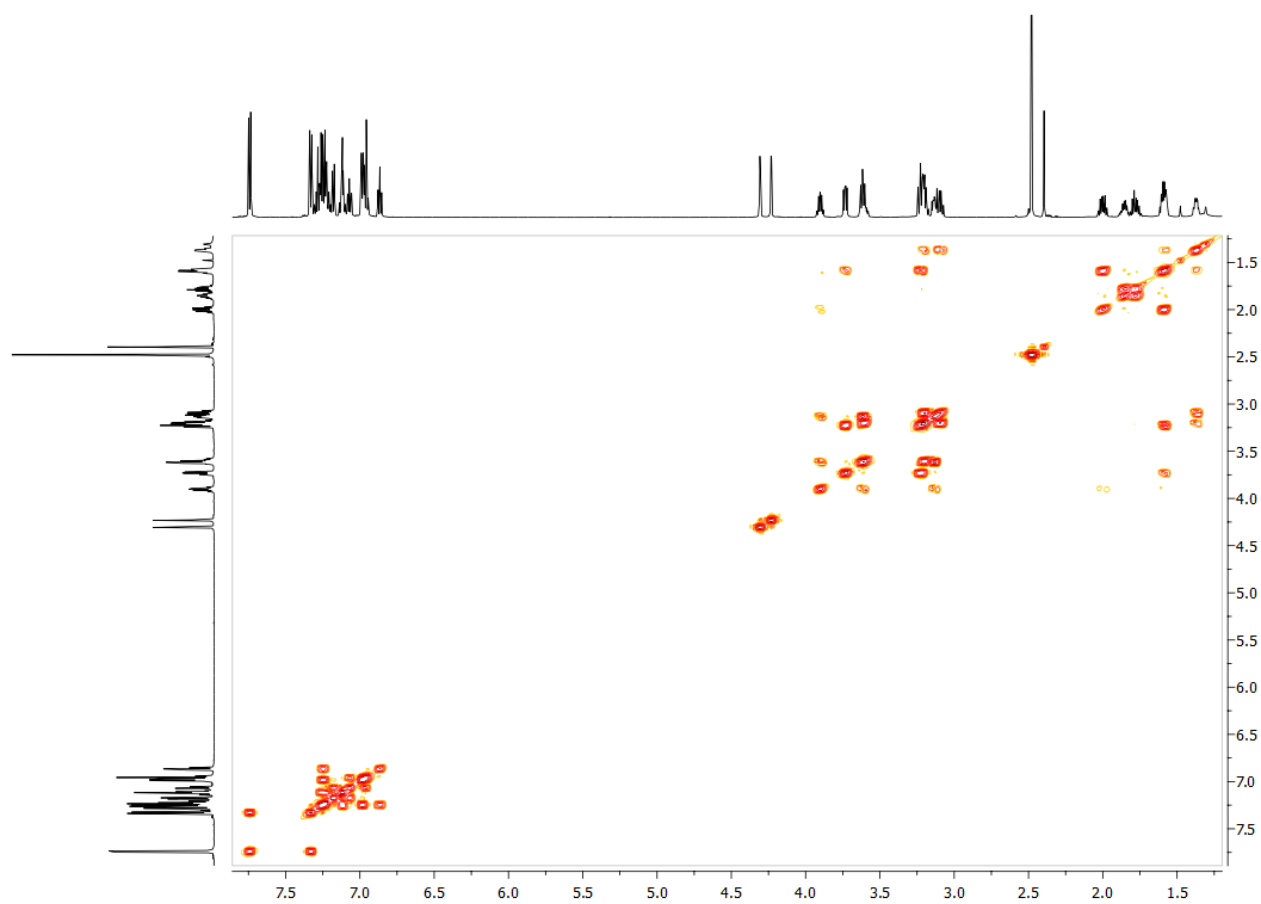

L3a,  $^1\text{H}$ - $^1\text{H}$  COSY.

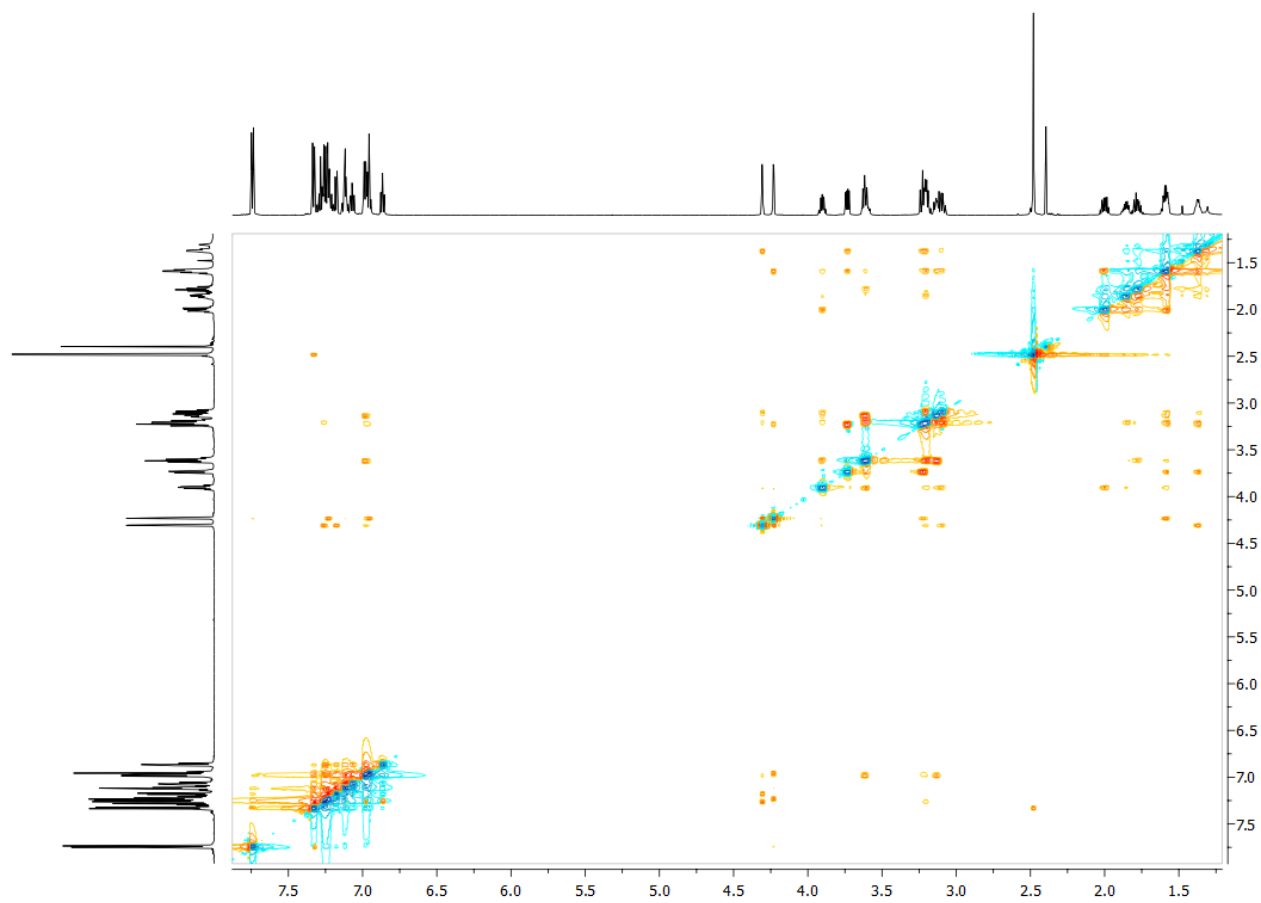

L3a,  $^1\text{H}$ - $^1\text{H}$  NOESY.

# NMR AND MASS SPECTRA

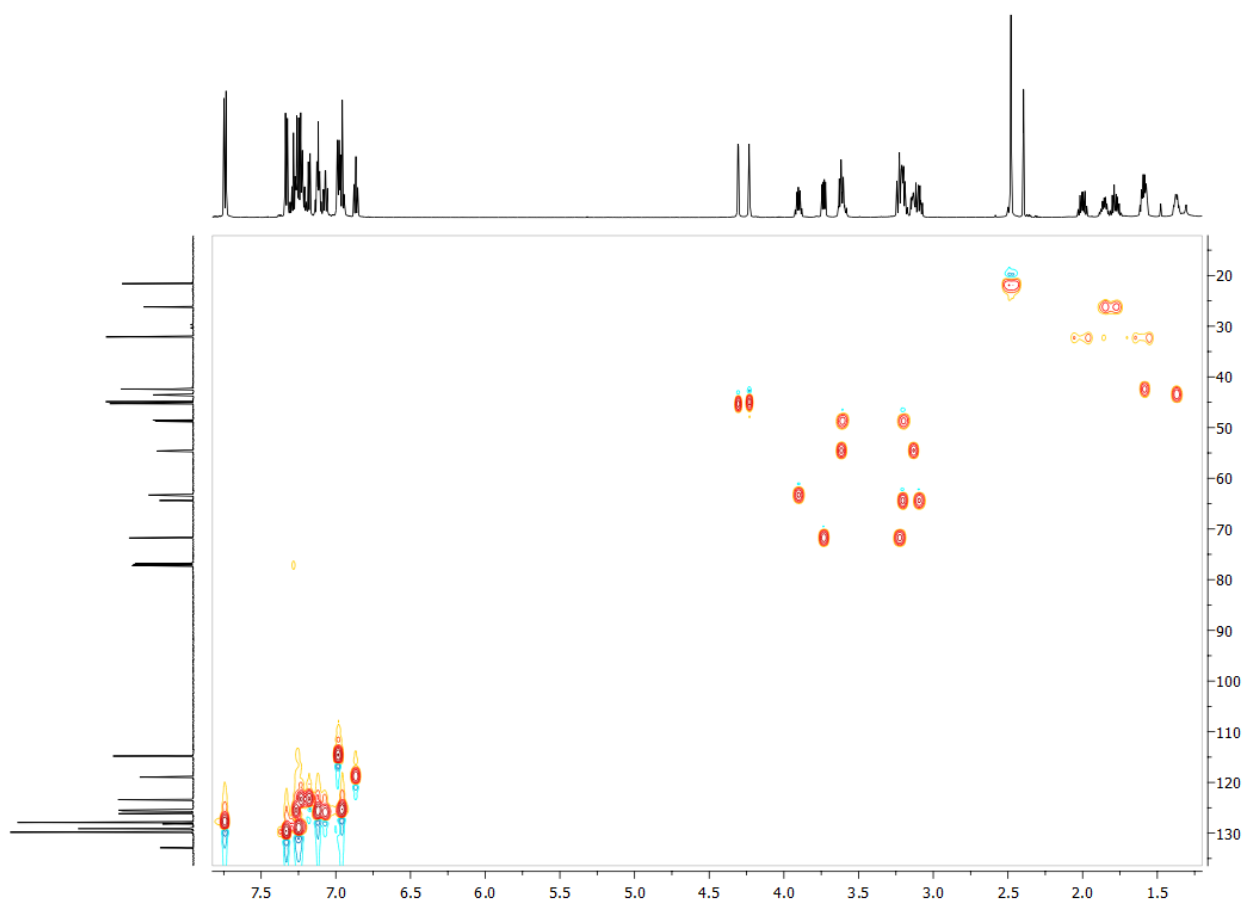

L3a,  $^1\text{H}$ - $^{13}\text{C}$  HSQC.

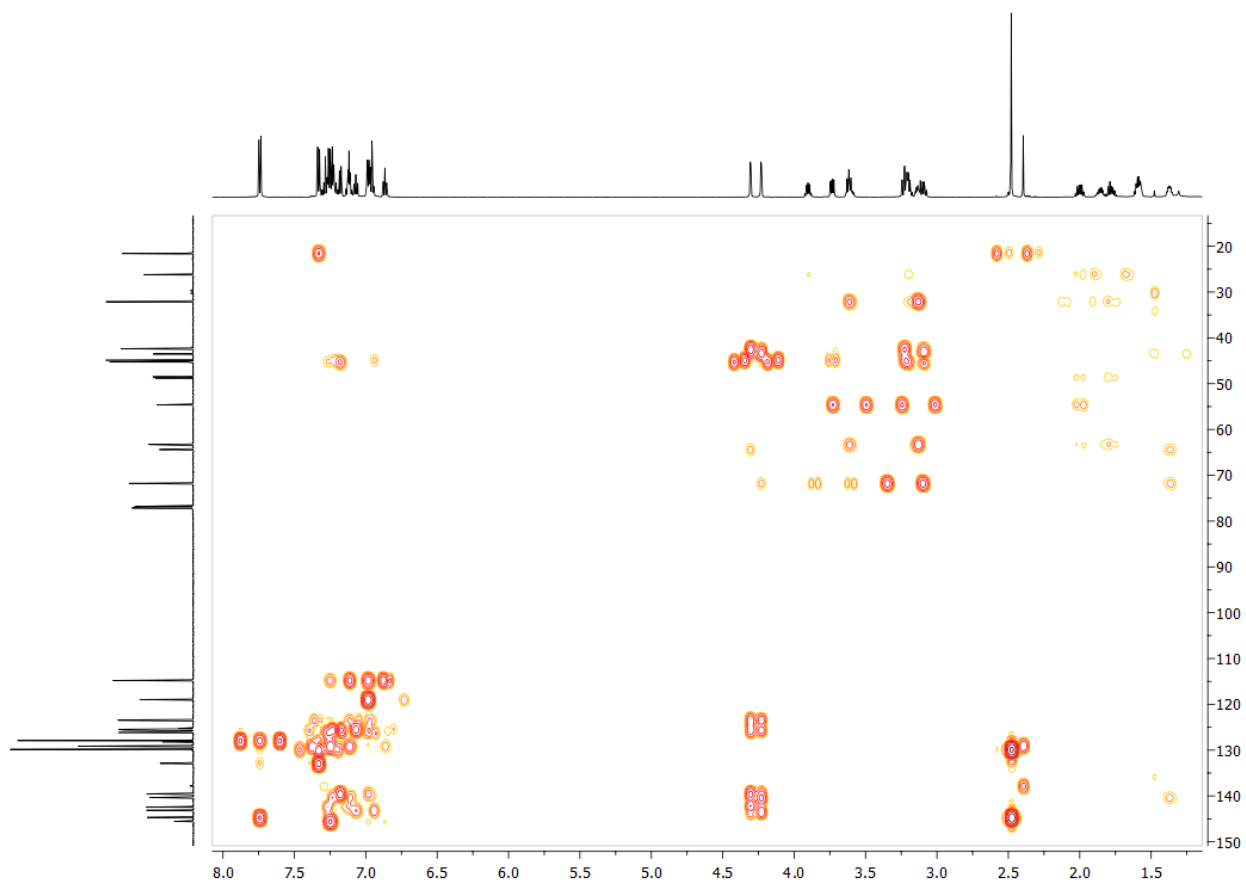

L3a,  $^1\text{H}$ - $^{13}\text{C}$  HMBC.

# NMR AND MASS SPECTRA

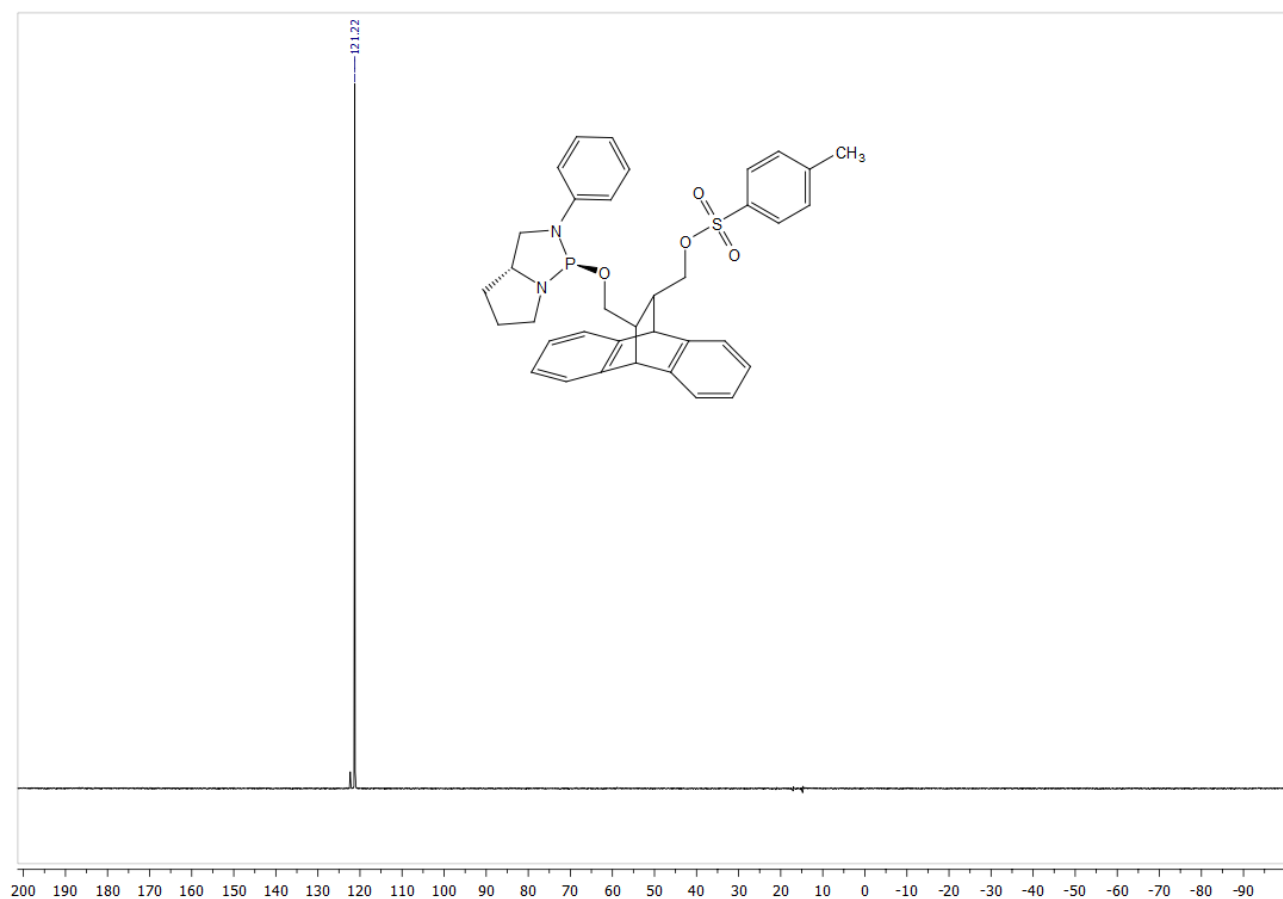

**L3b**,  $^{31}\text{P}\{^1\text{H}\}$  (242.9 MHz,  $\text{CDCl}_3$ , 30 °C).

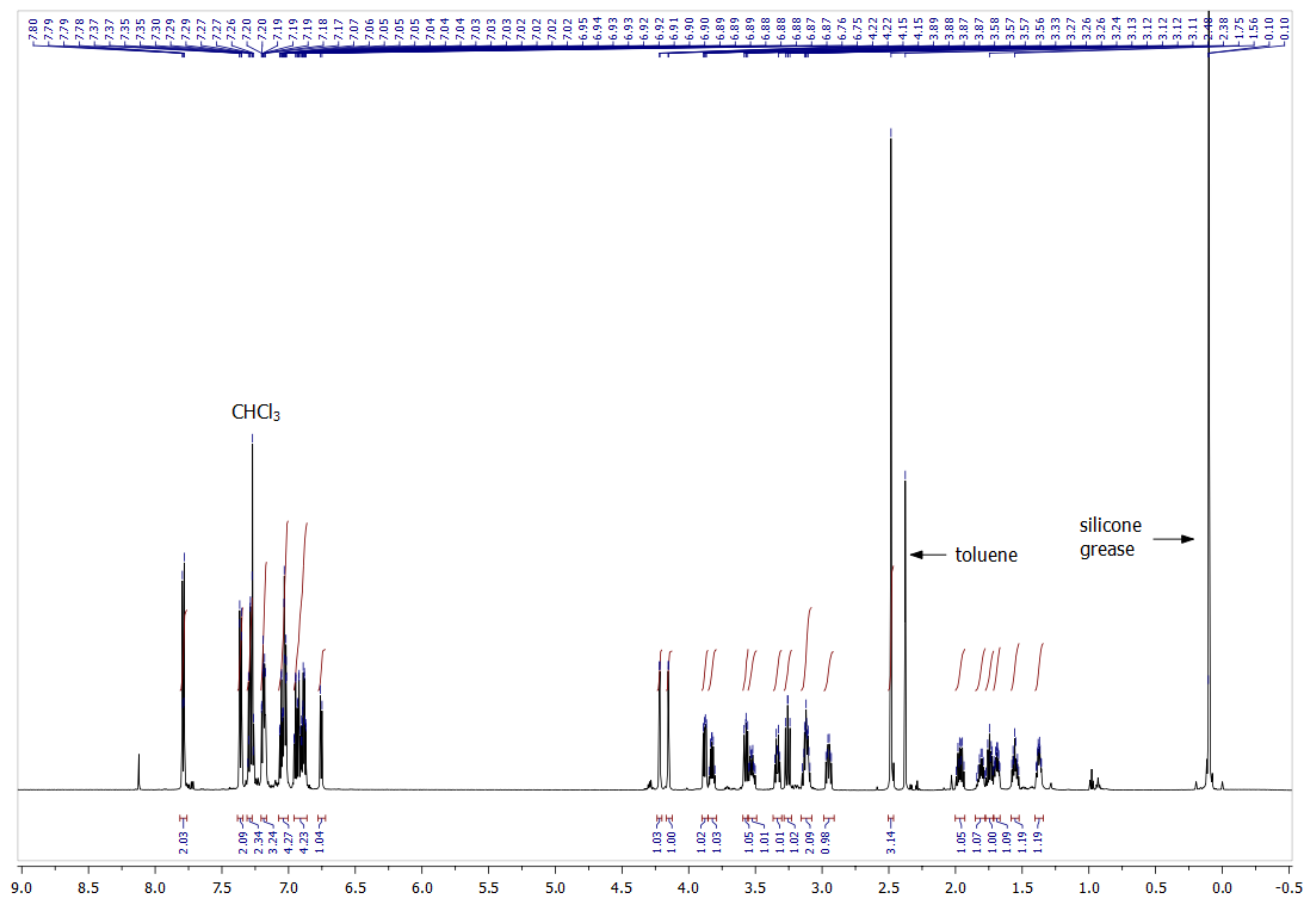

**L3b**,  $^1\text{H}$  (600.1 MHz,  $\text{CDCl}_3$ , 30 °C).

# NMR AND MASS SPECTRA

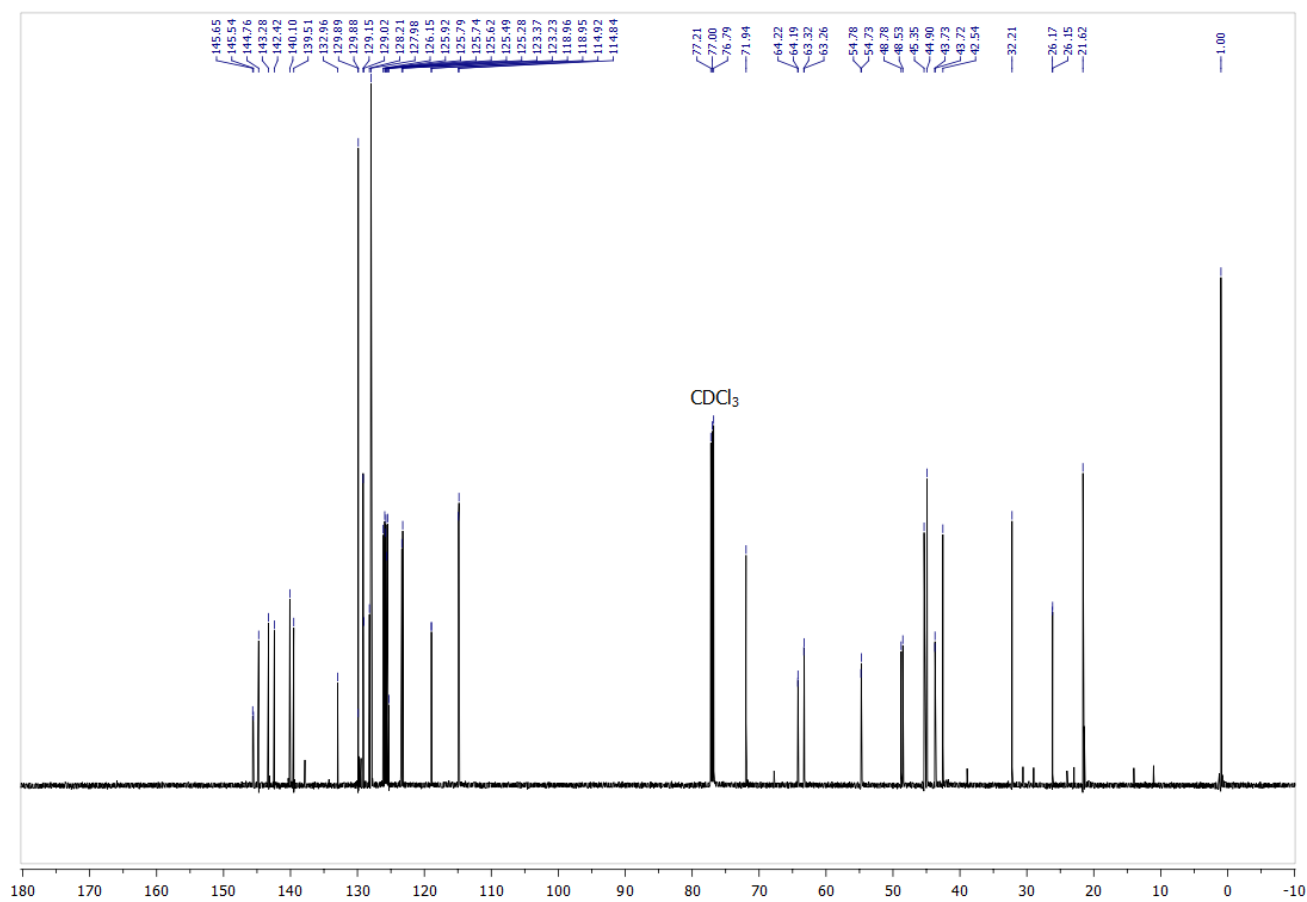

**L3b**,  $^{13}\text{C}\{^1\text{H}\}$  (150.9 MHz,  $\text{CDCl}_3$ , 30 °C).

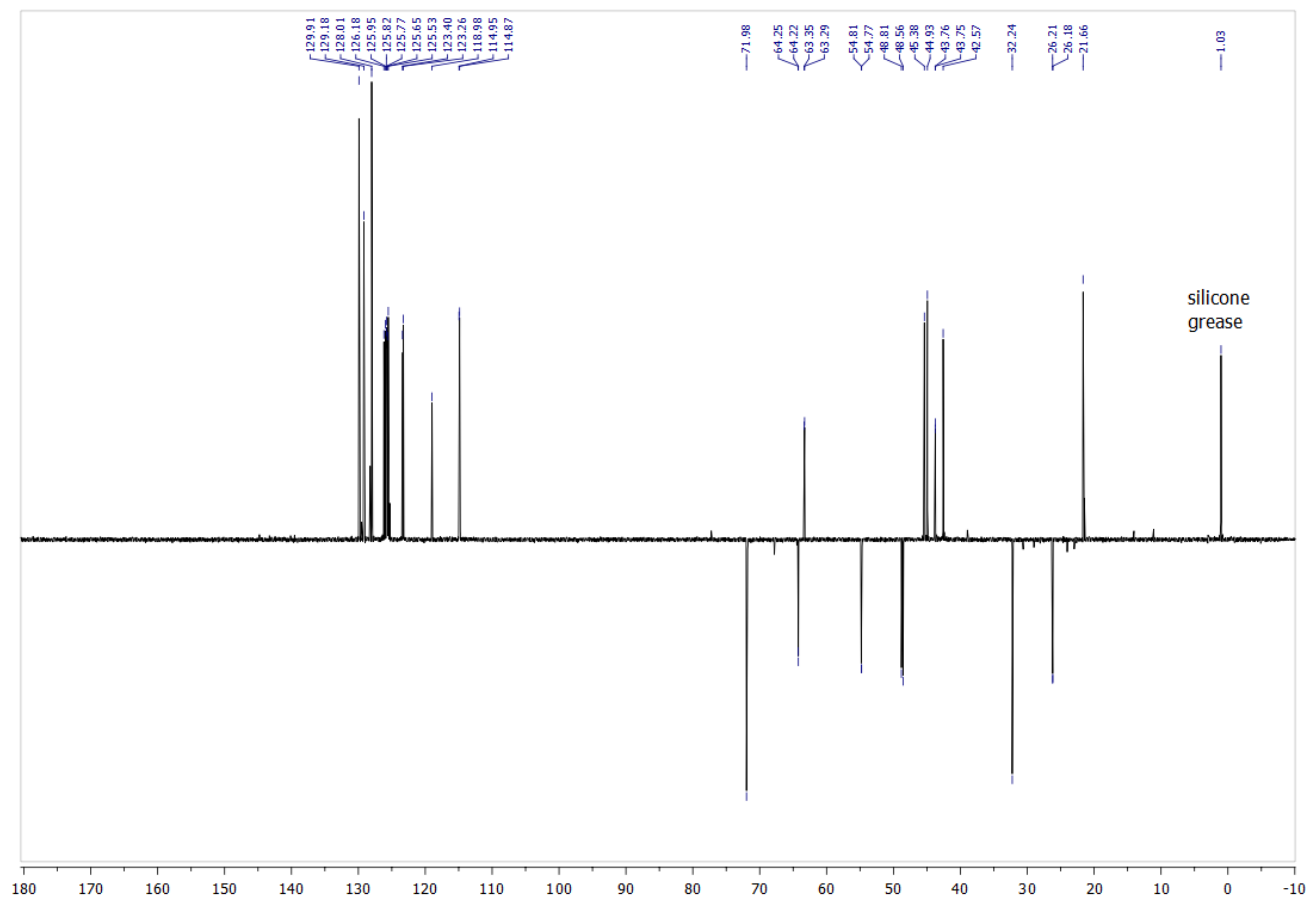

**L3b**,  $^{13}\text{C}\{^1\text{H}\}$  DEPT (150.9 MHz,  $\text{CDCl}_3$ , 30 °C).



# NMR AND MASS SPECTRA

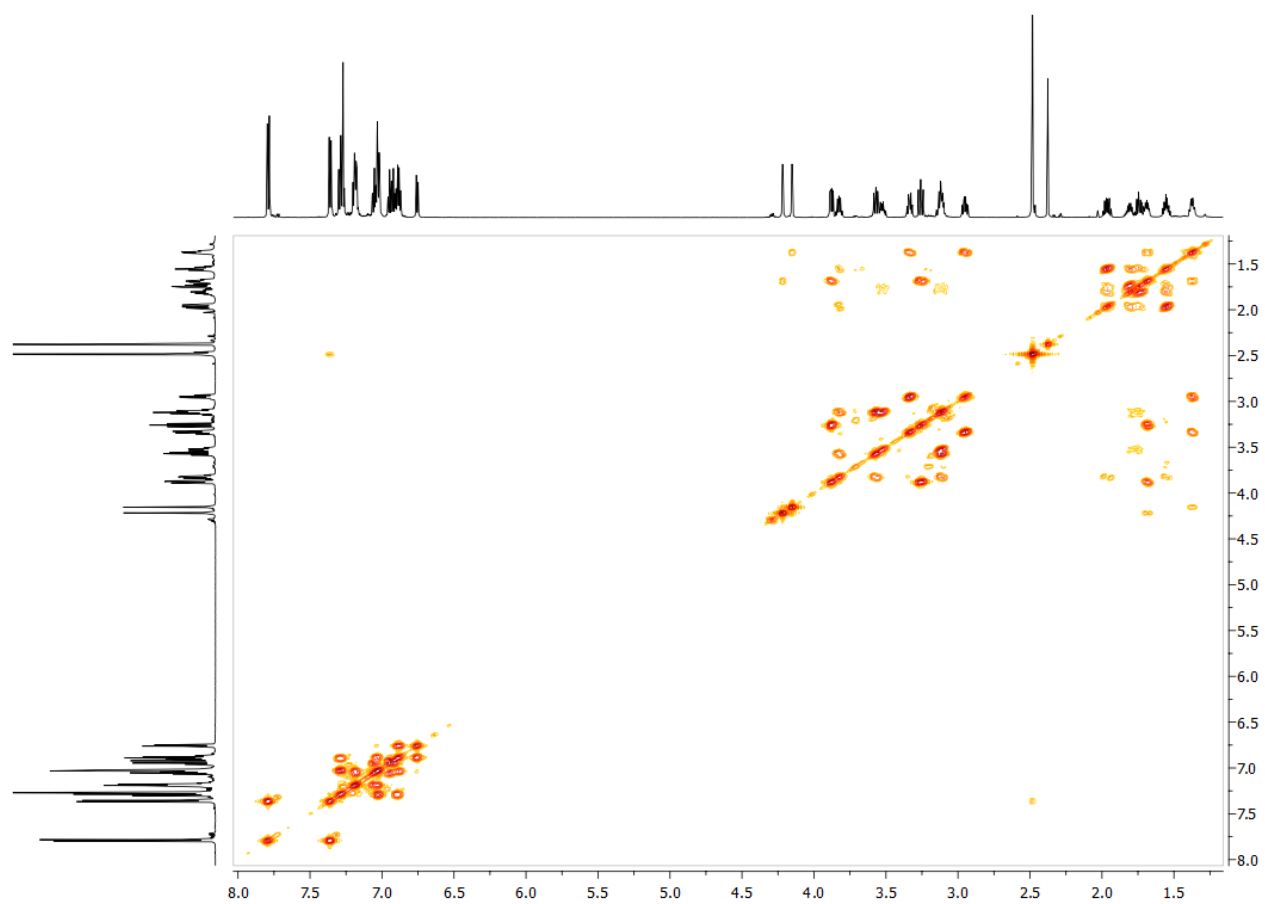

L3b,  $^1\text{H}$ - $^1\text{H}$  COSY.

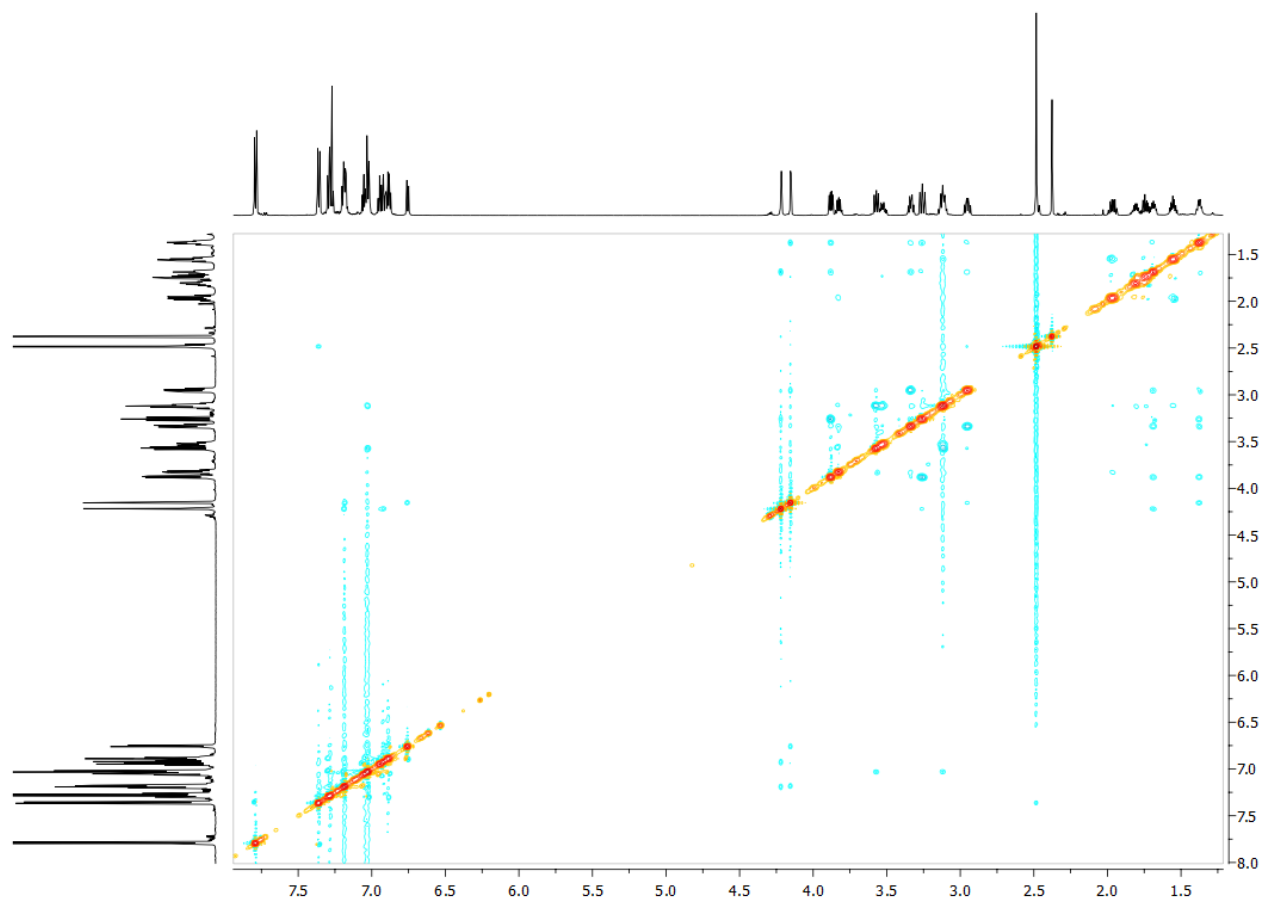

L3b,  $^1\text{H}$ - $^1\text{H}$  NOESY.



# NMR AND MASS SPECTRA

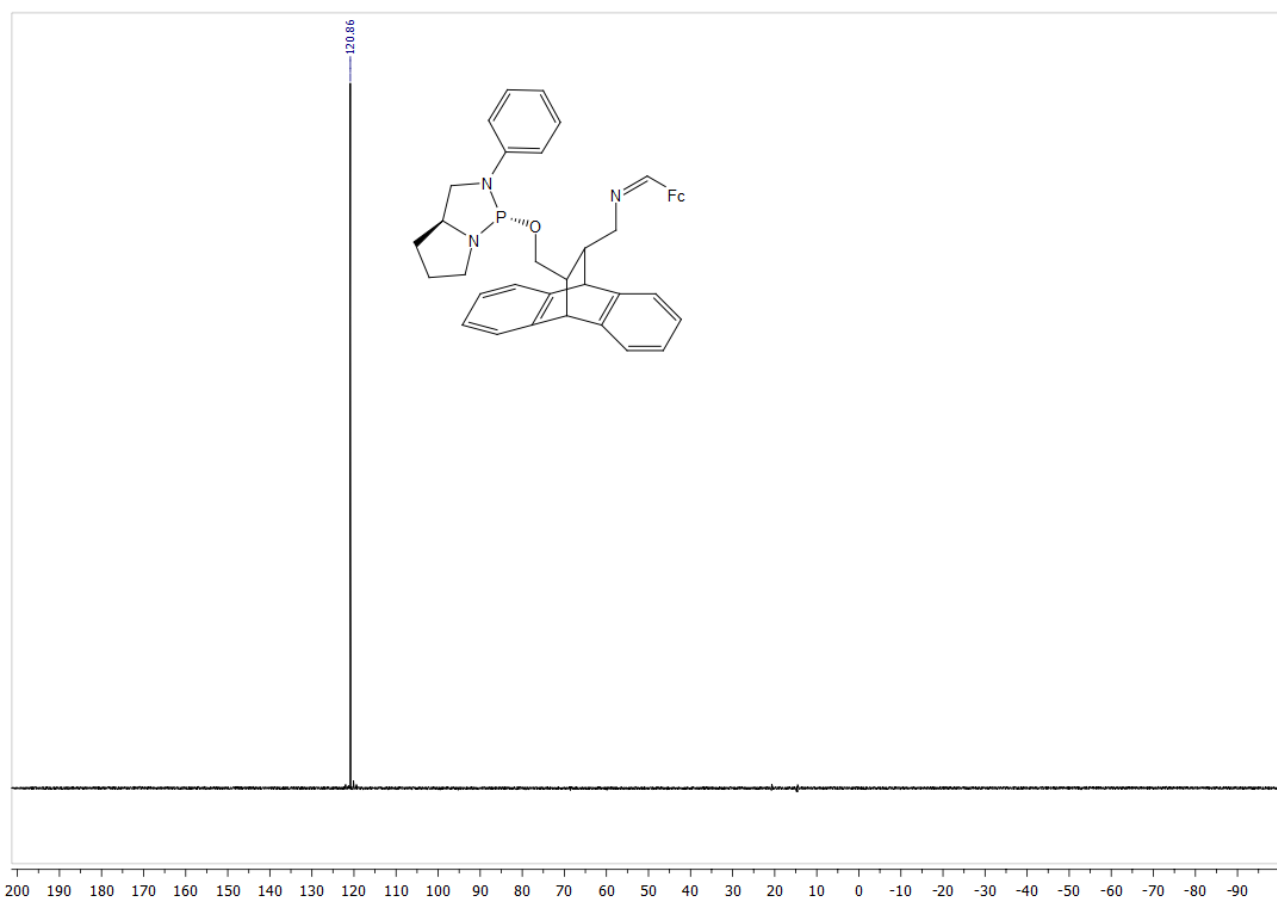

L4,  $^{31}\text{P}\{^1\text{H}\}$  (242.9 MHz,  $\text{CDCl}_3$ , 30 °C).

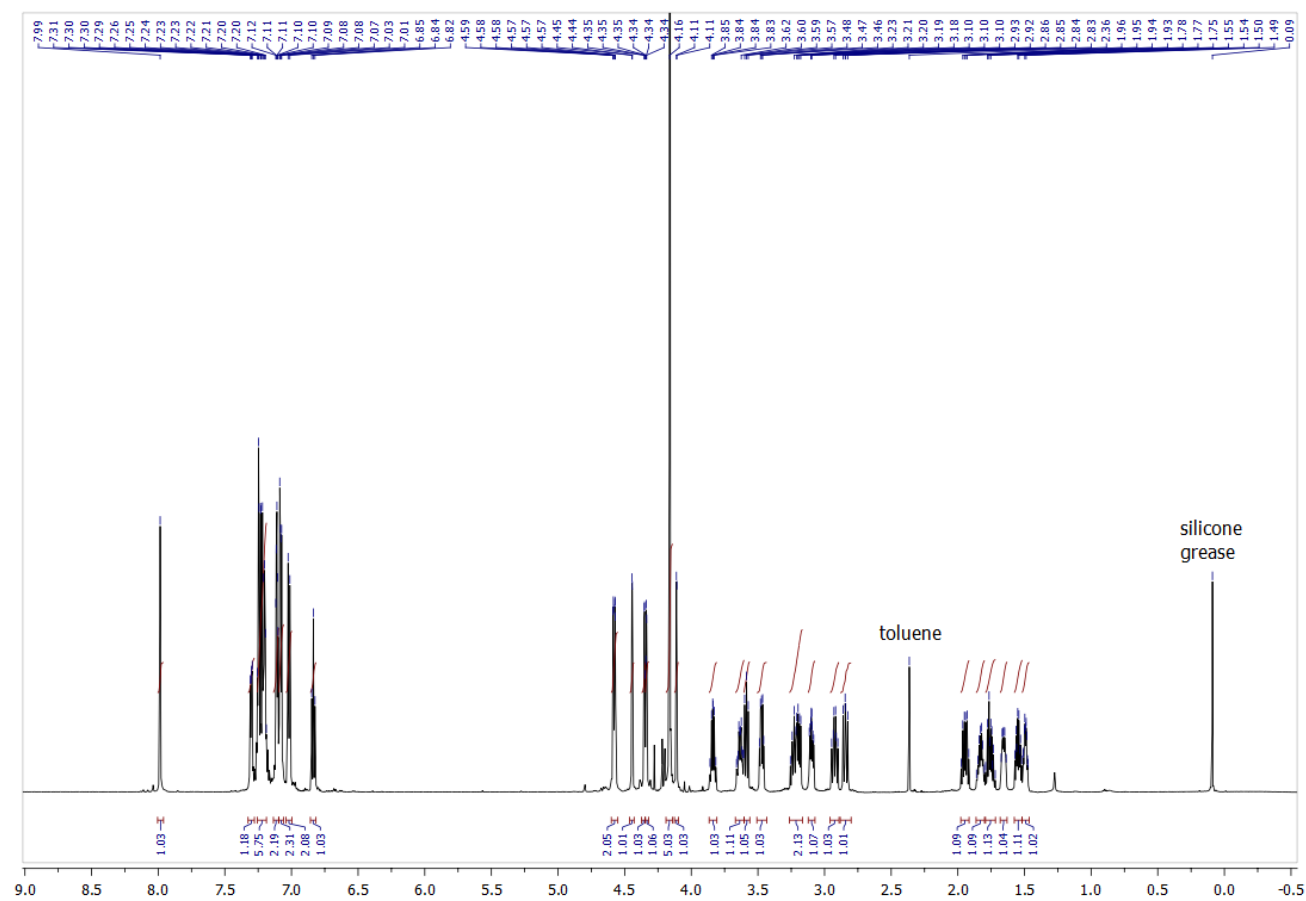

L4,  $^1\text{H}$  (600.1 MHz,  $\text{CDCl}_3$ , 30 °C).

# NMR AND MASS SPECTRA

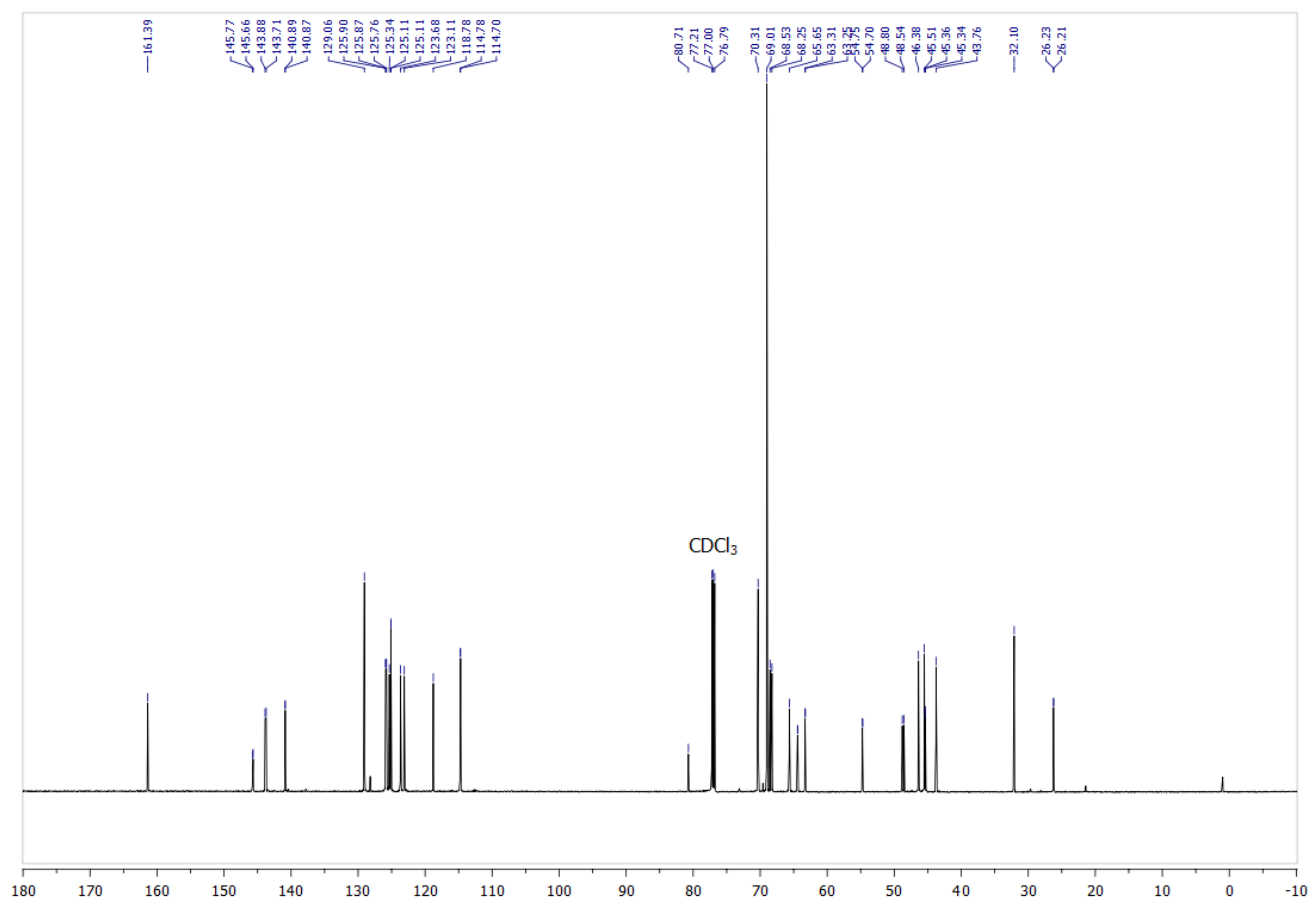

**L4**,  $^{13}\text{C}\{^1\text{H}\}$  (150.9 MHz,  $\text{CDCl}_3$ , 30 °C).

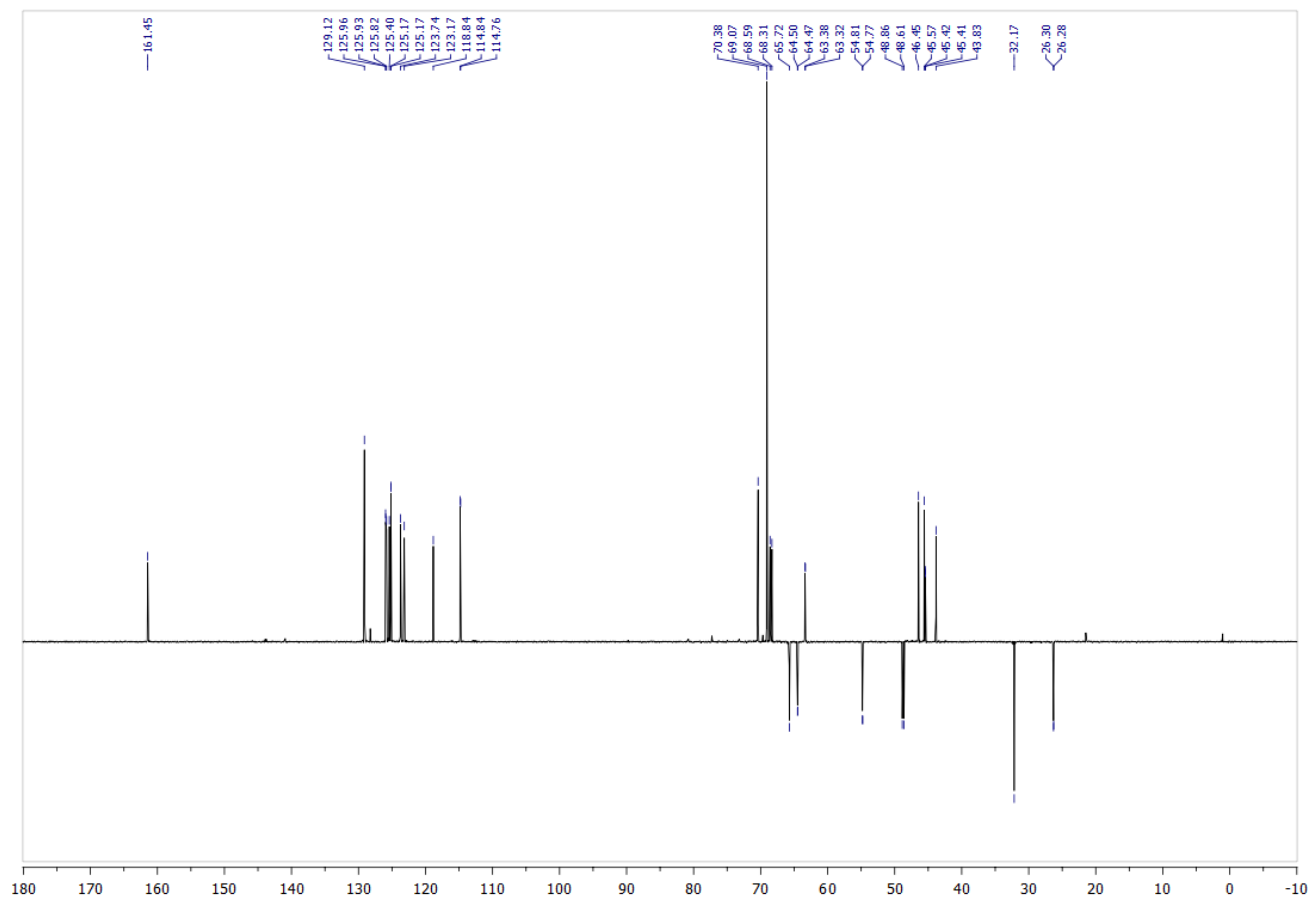

**L4**,  $^{13}\text{C}\{^1\text{H}\}$  DEPT (150.9 MHz,  $\text{CDCl}_3$ , 30 °C).

# NMR AND MASS SPECTRA

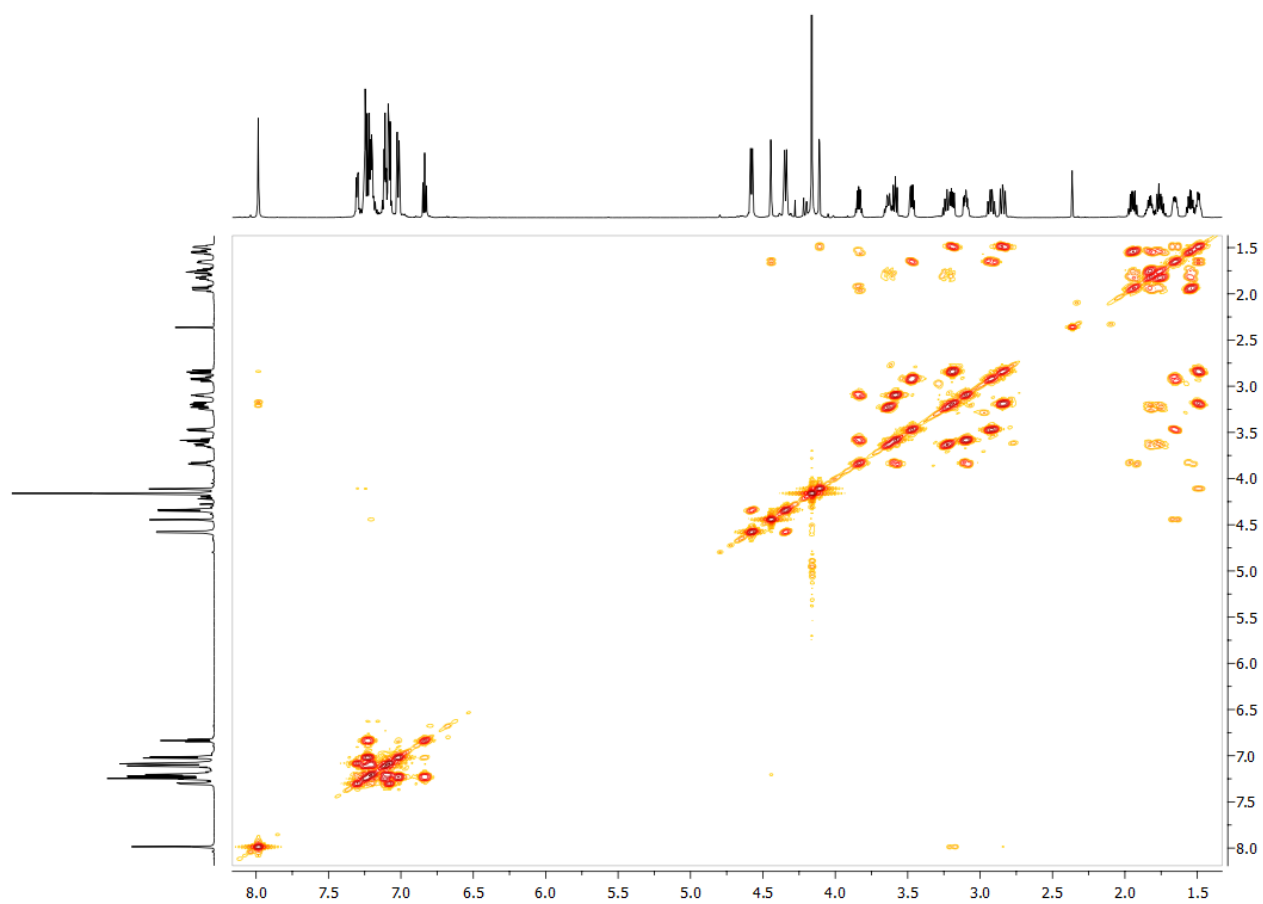

L4,  $^1\text{H}$ - $^1\text{H}$  COSY.

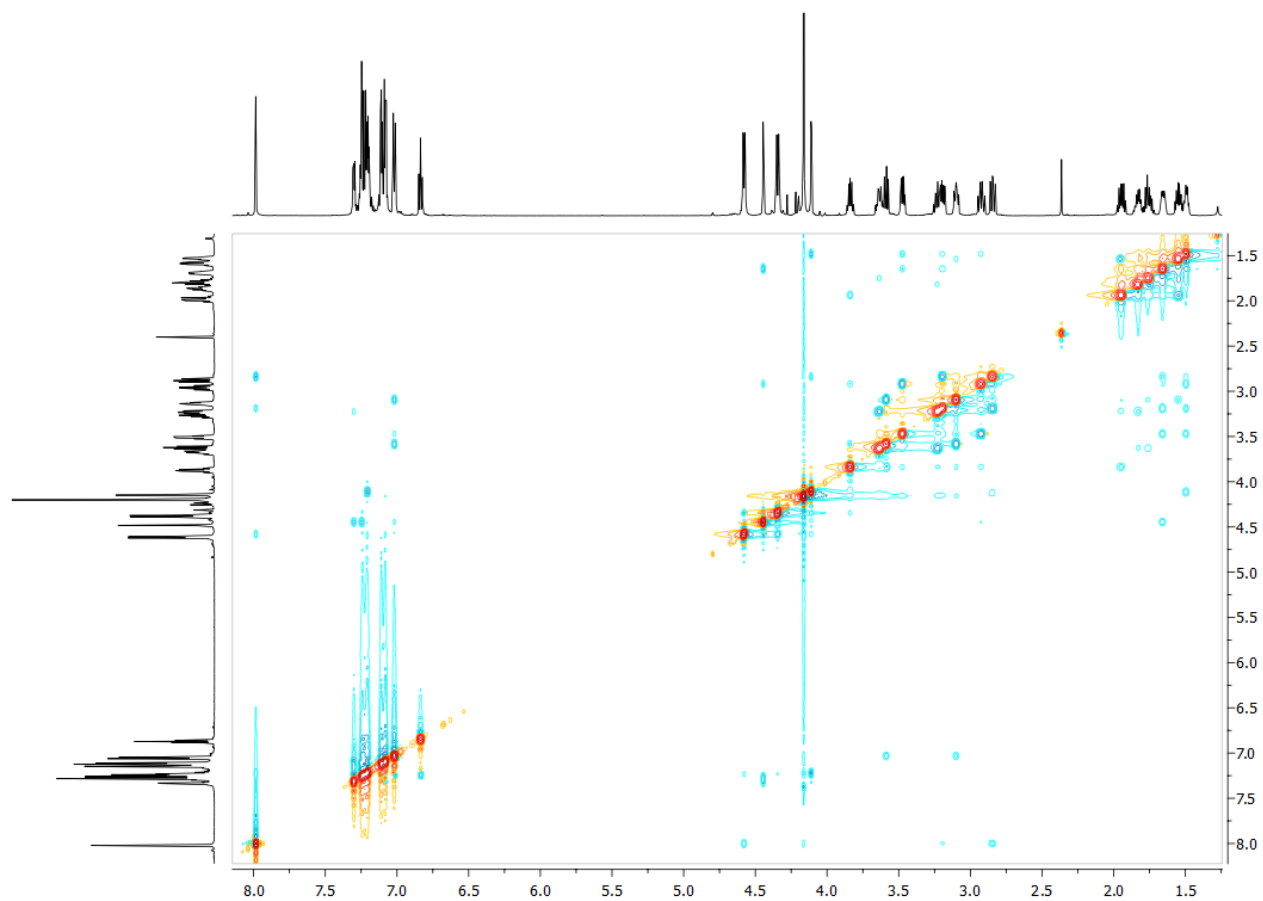

L4,  $^1\text{H}$ - $^1\text{H}$  NOESY.

# NMR AND MASS SPECTRA

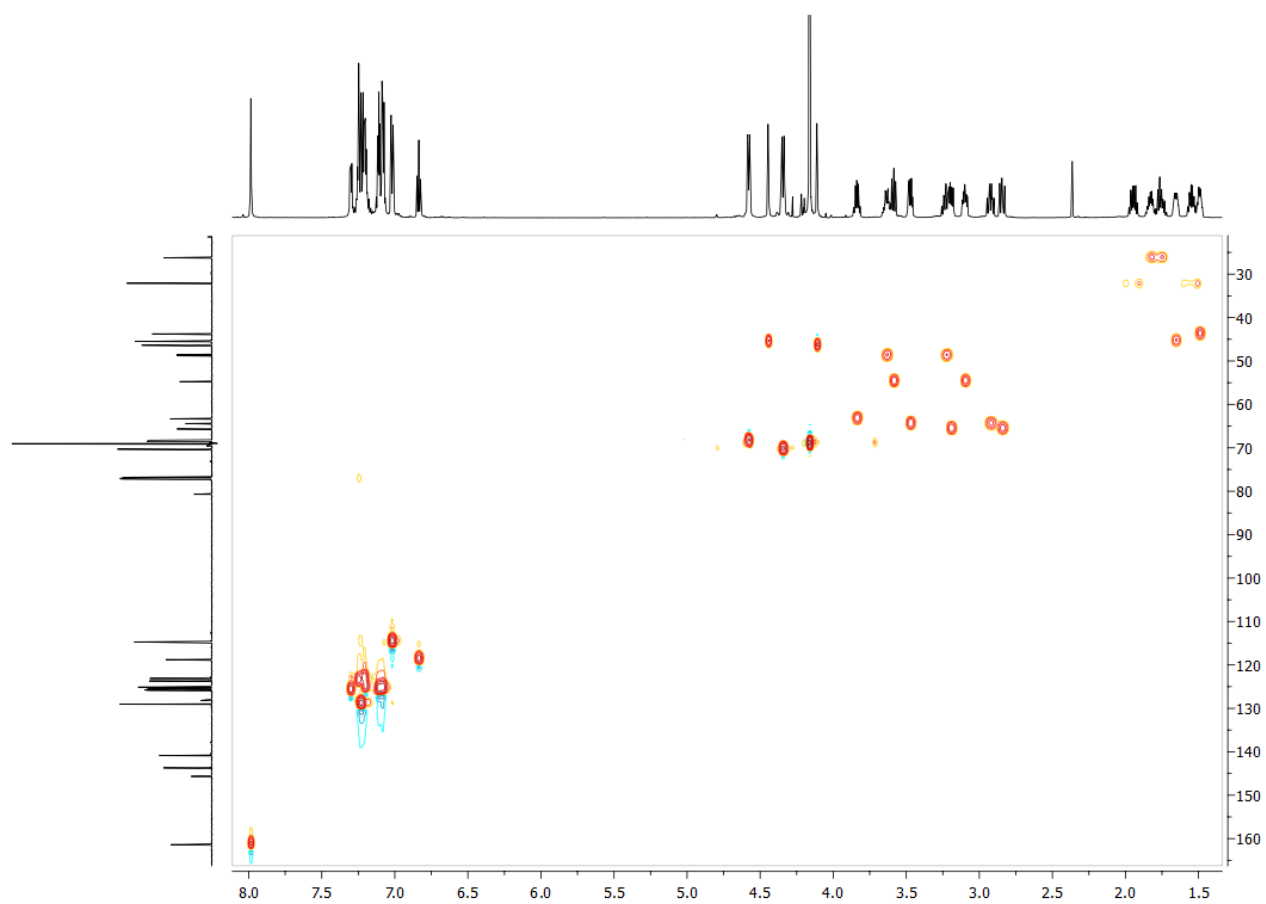

L4,  $^1\text{H}$ - $^{13}\text{C}$  HSQC.

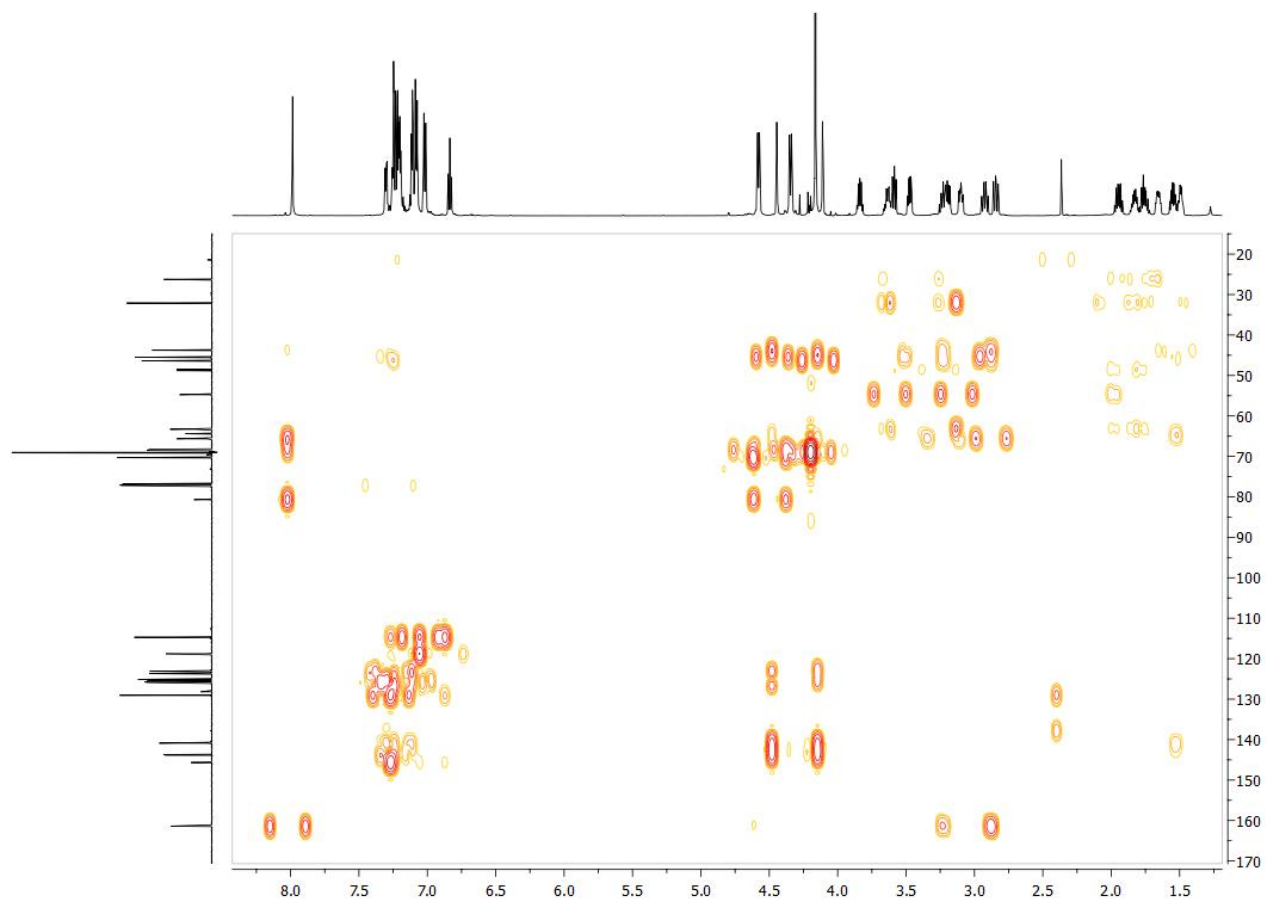

L4,  $^1\text{H}$ - $^{13}\text{C}$  HMBC.

# NMR AND MASS SPECTRA

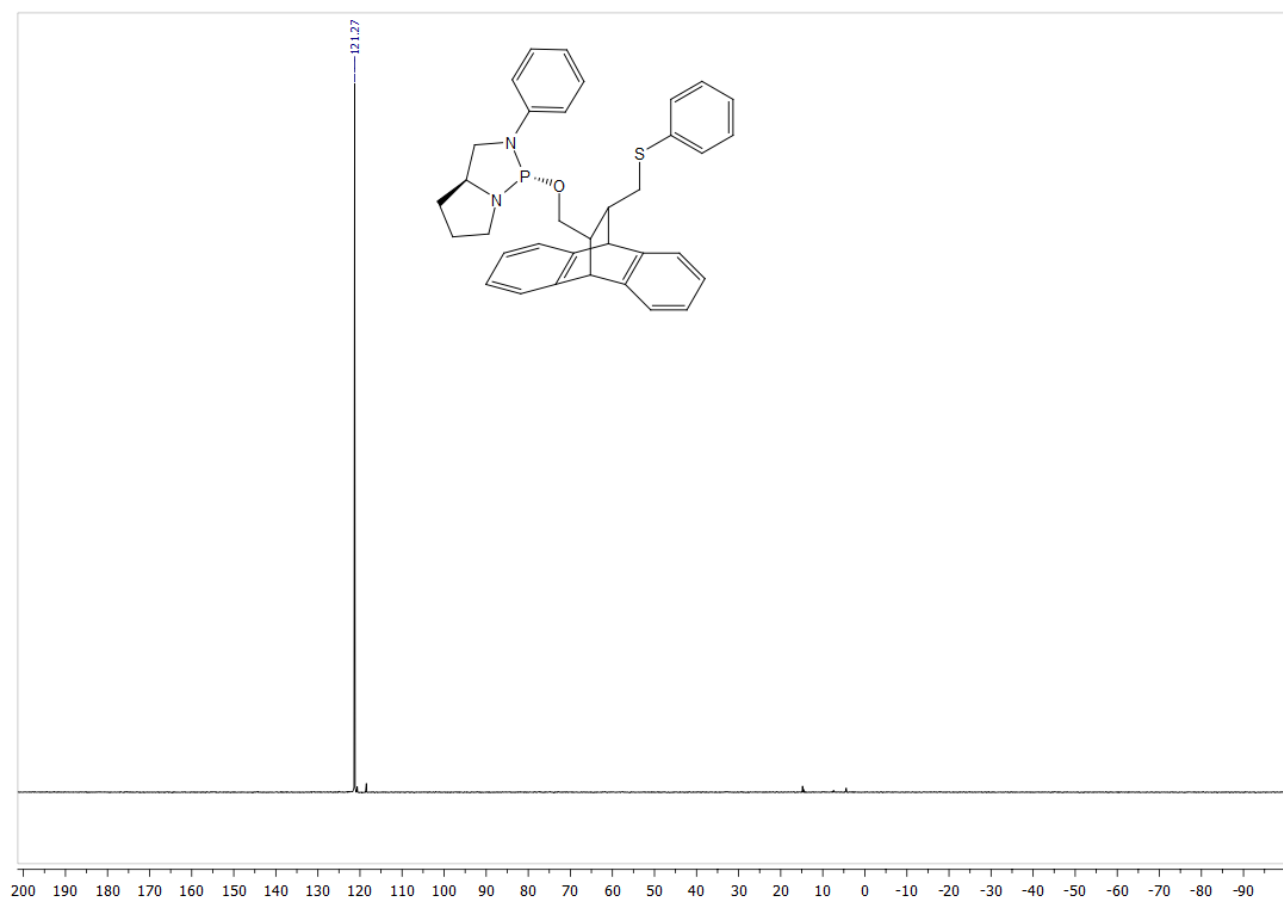

L5a,  $^{31}\text{P}\{^1\text{H}\}$  (242.9 MHz,  $\text{CDCl}_3$ , 30 °C).

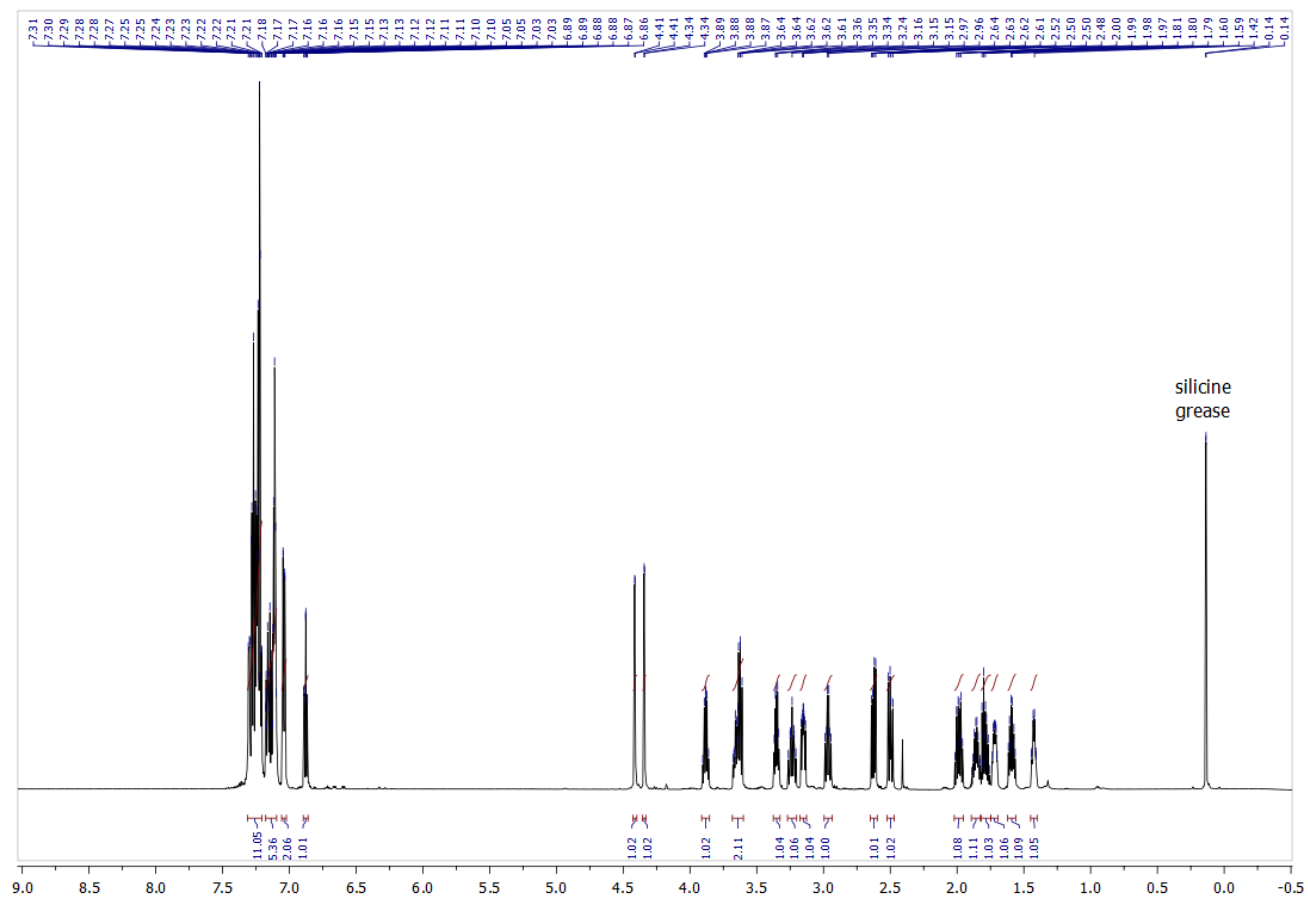

L5a,  $^1\text{H}$  (600.1 MHz,  $\text{CDCl}_3$ , 30 °C).

# NMR AND MASS SPECTRA

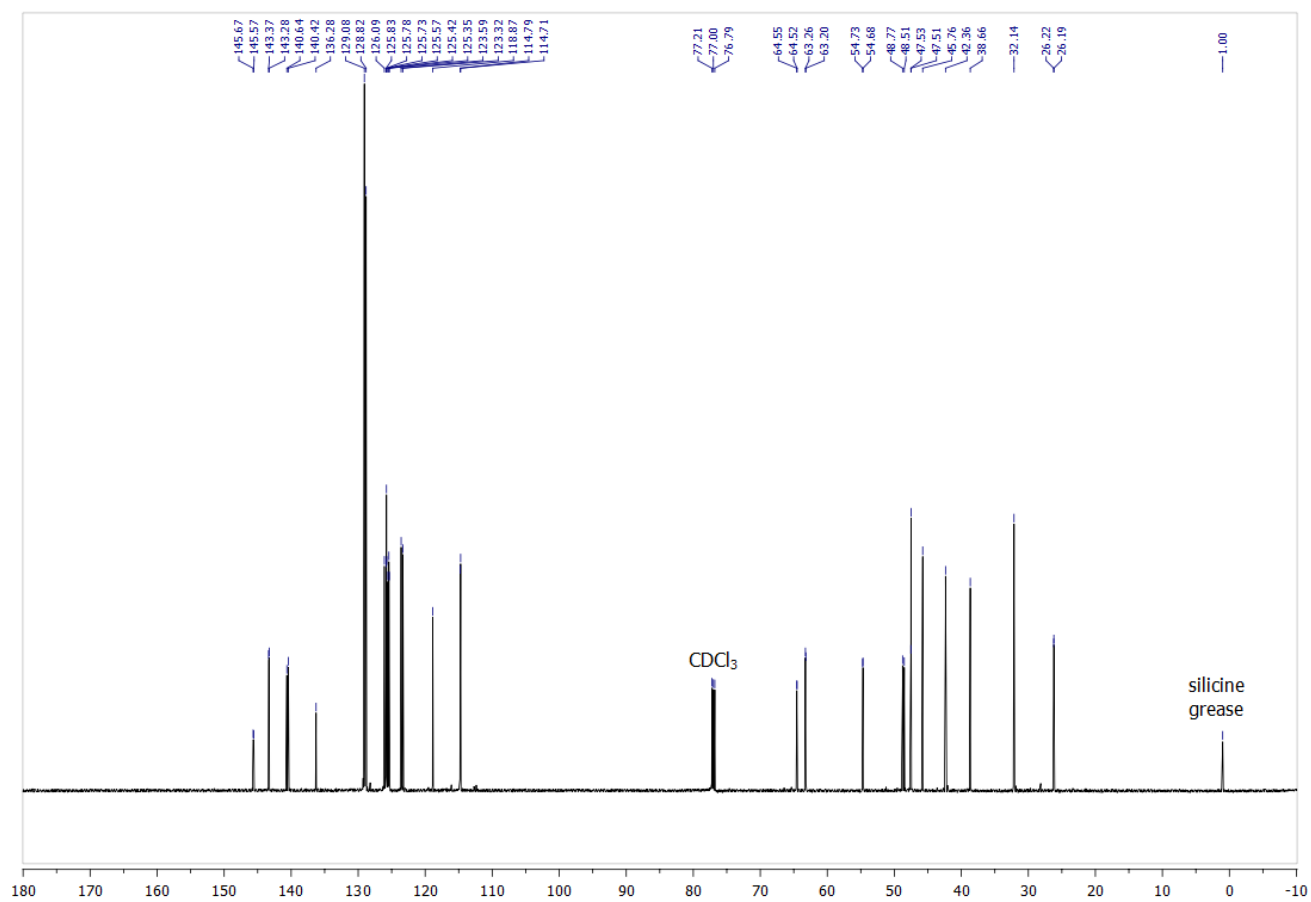

**L5a**,  $^{13}\text{C}\{^1\text{H}\}$  (150.9 MHz,  $\text{CDCl}_3$ , 30 °C).

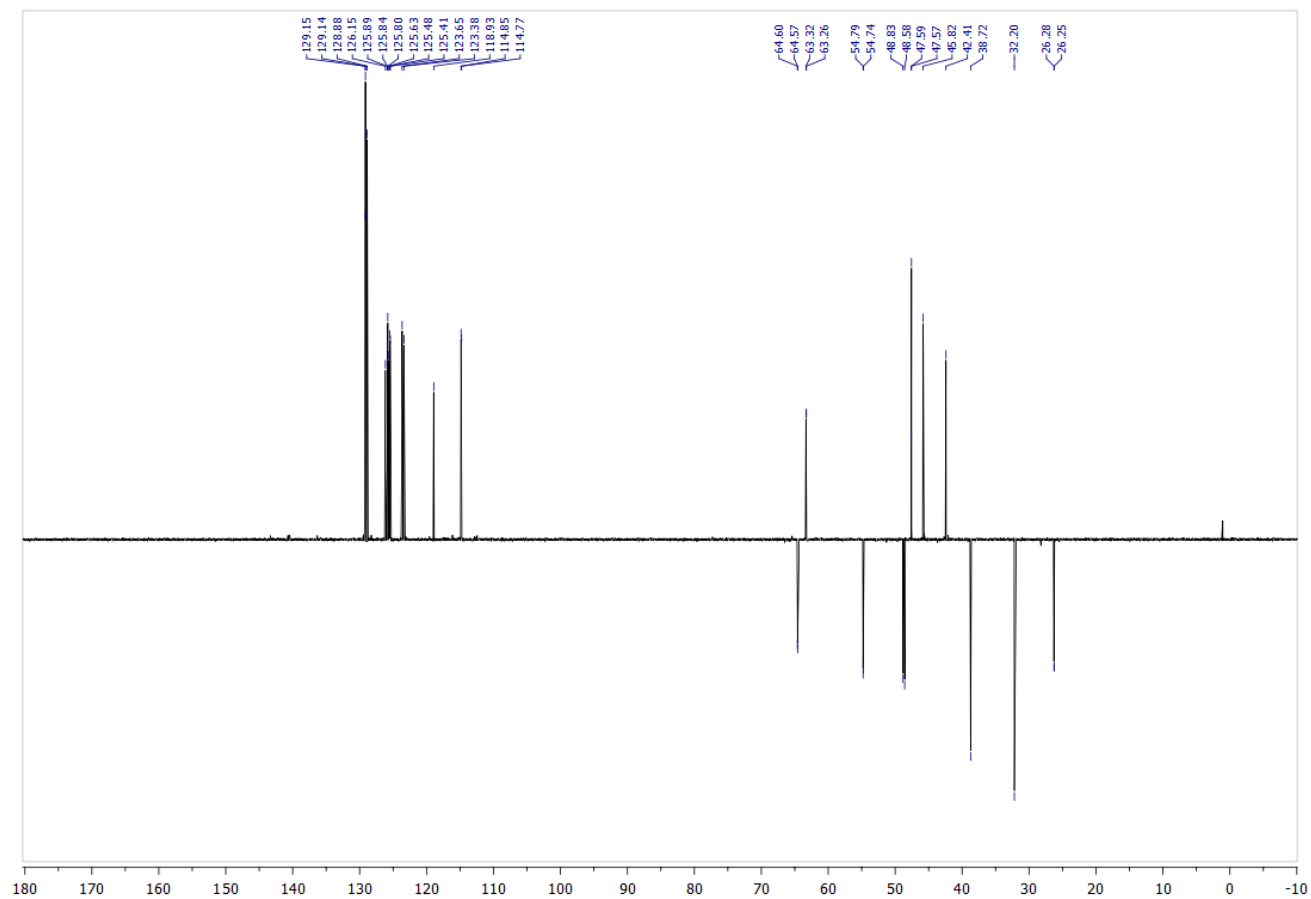

**L5a**,  $^{13}\text{C}\{^1\text{H}\}$  DEPT (150.9 MHz,  $\text{CDCl}_3$ , 30 °C).



# NMR AND MASS SPECTRA

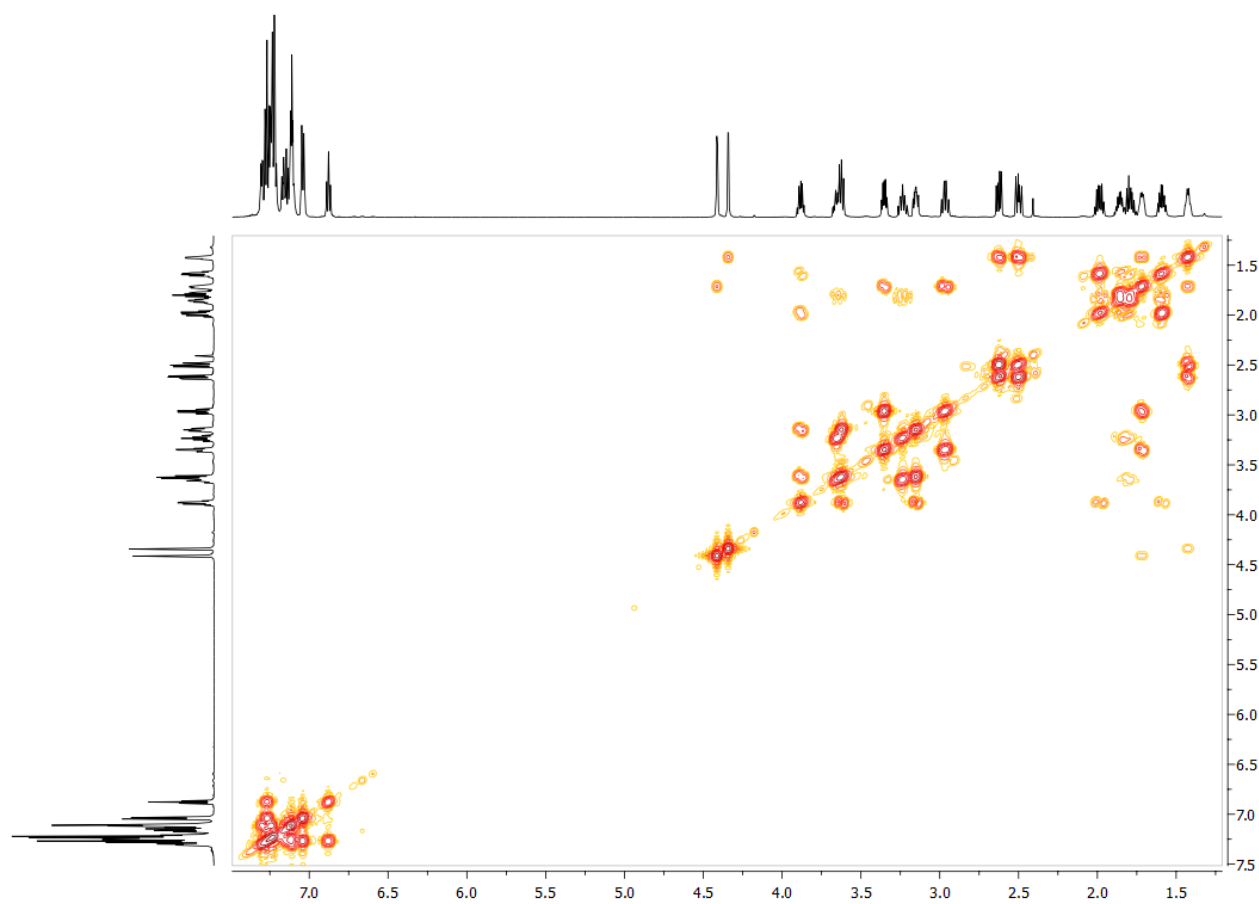

L5a,  $^1\text{H}$ - $^1\text{H}$  COSY.

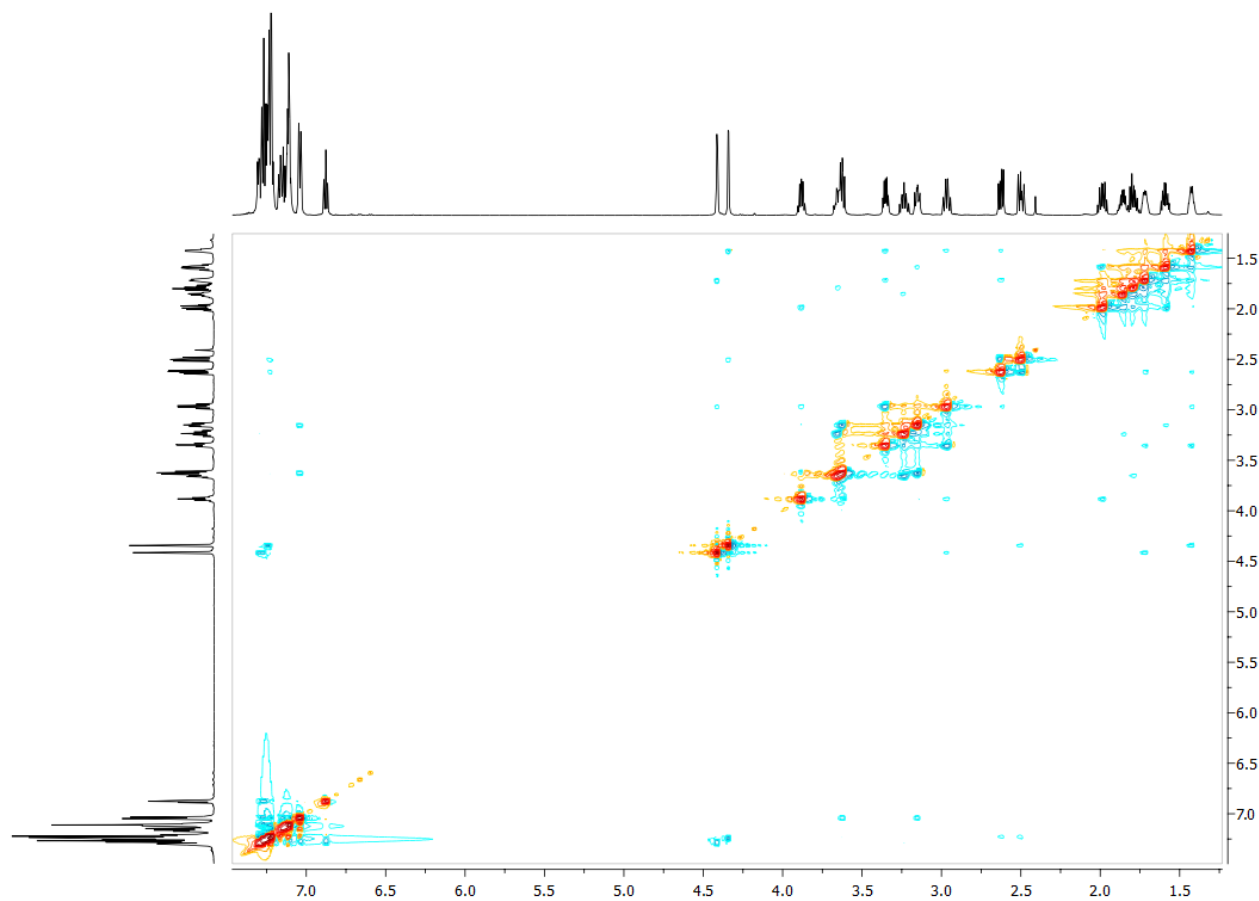

L5a,  $^1\text{H}$ - $^1\text{H}$  NOESY.

# NMR AND MASS SPECTRA

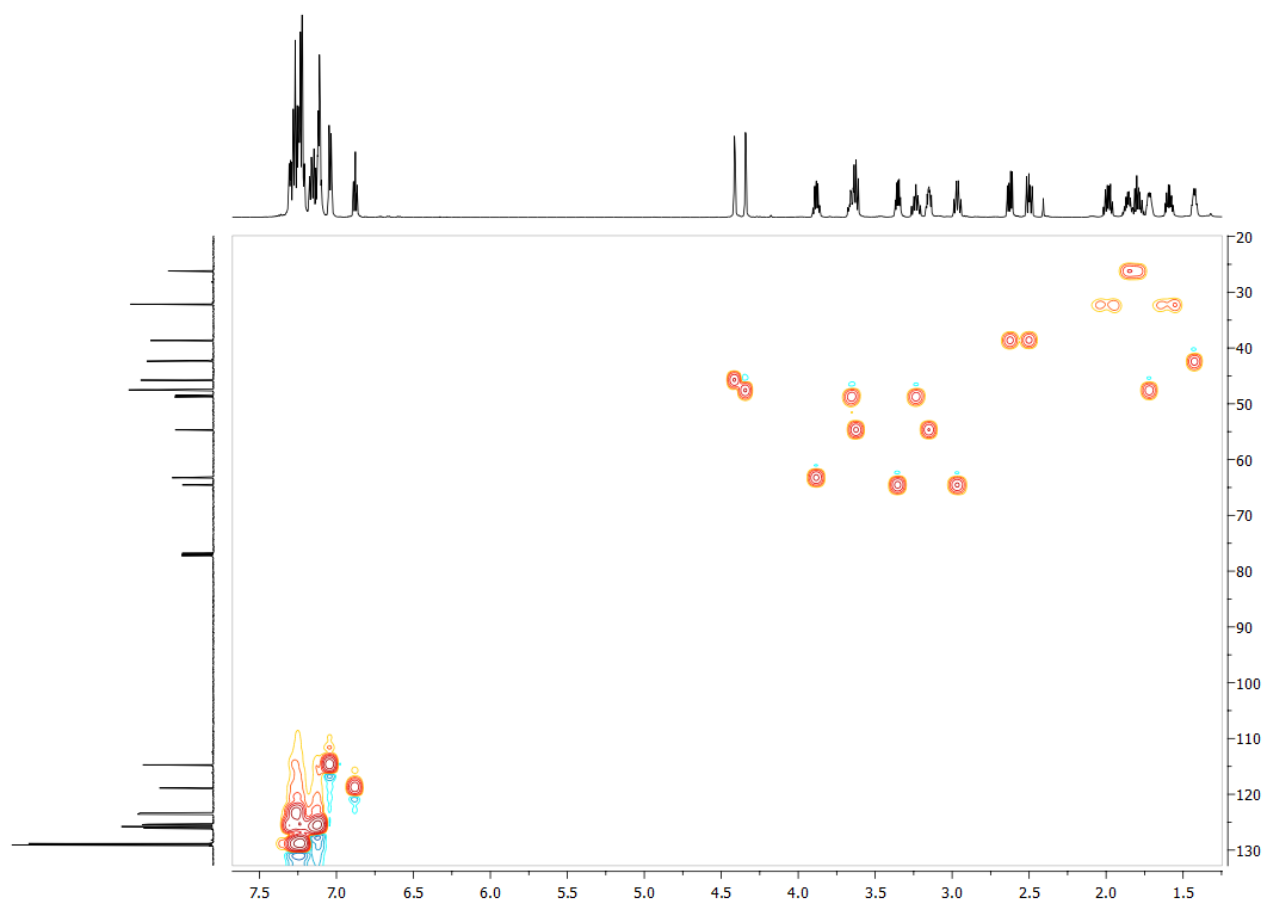

L5a,  $^1\text{H}$ - $^{13}\text{C}$  HSQC.

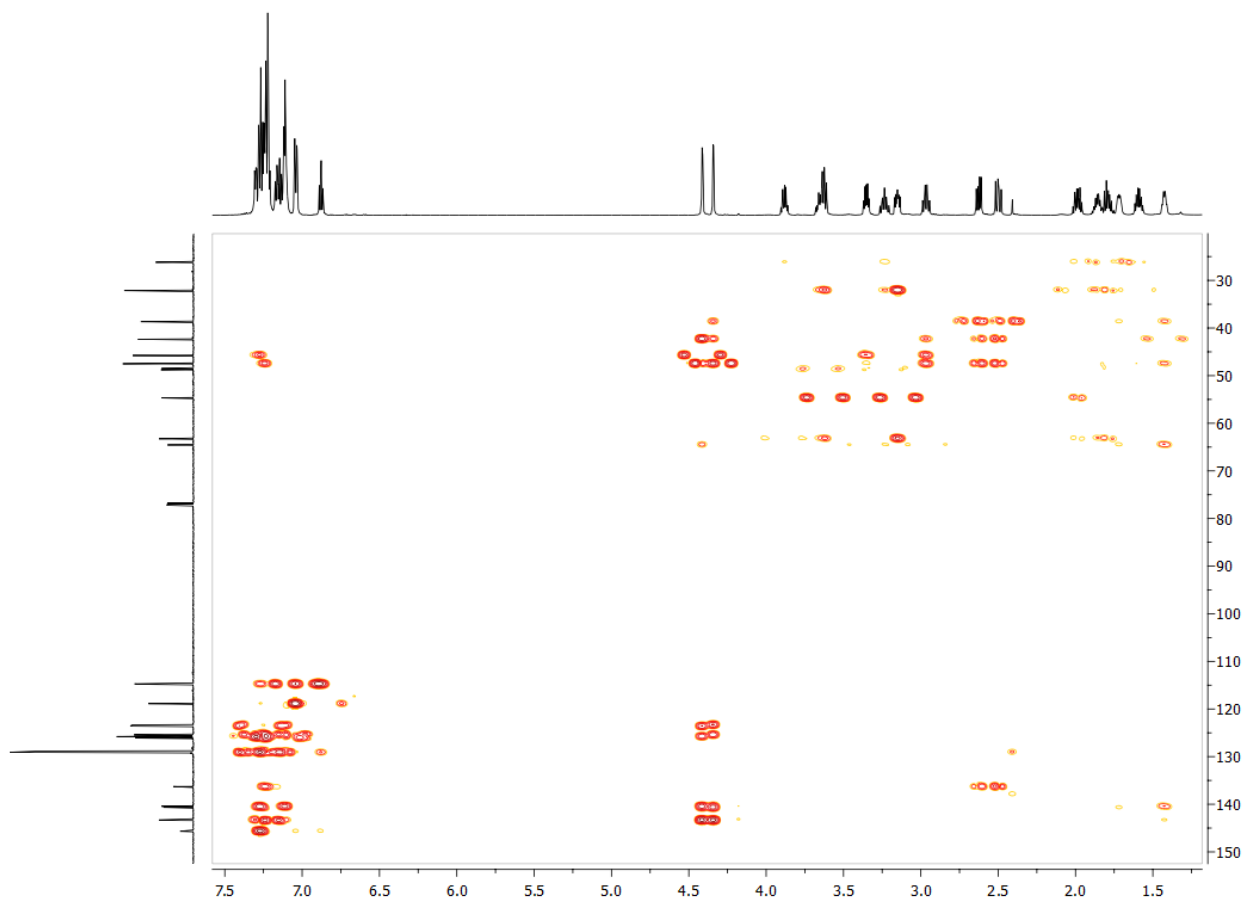

L5a,  $^1\text{H}$ - $^{13}\text{C}$  HMBC.

# NMR AND MASS SPECTRA

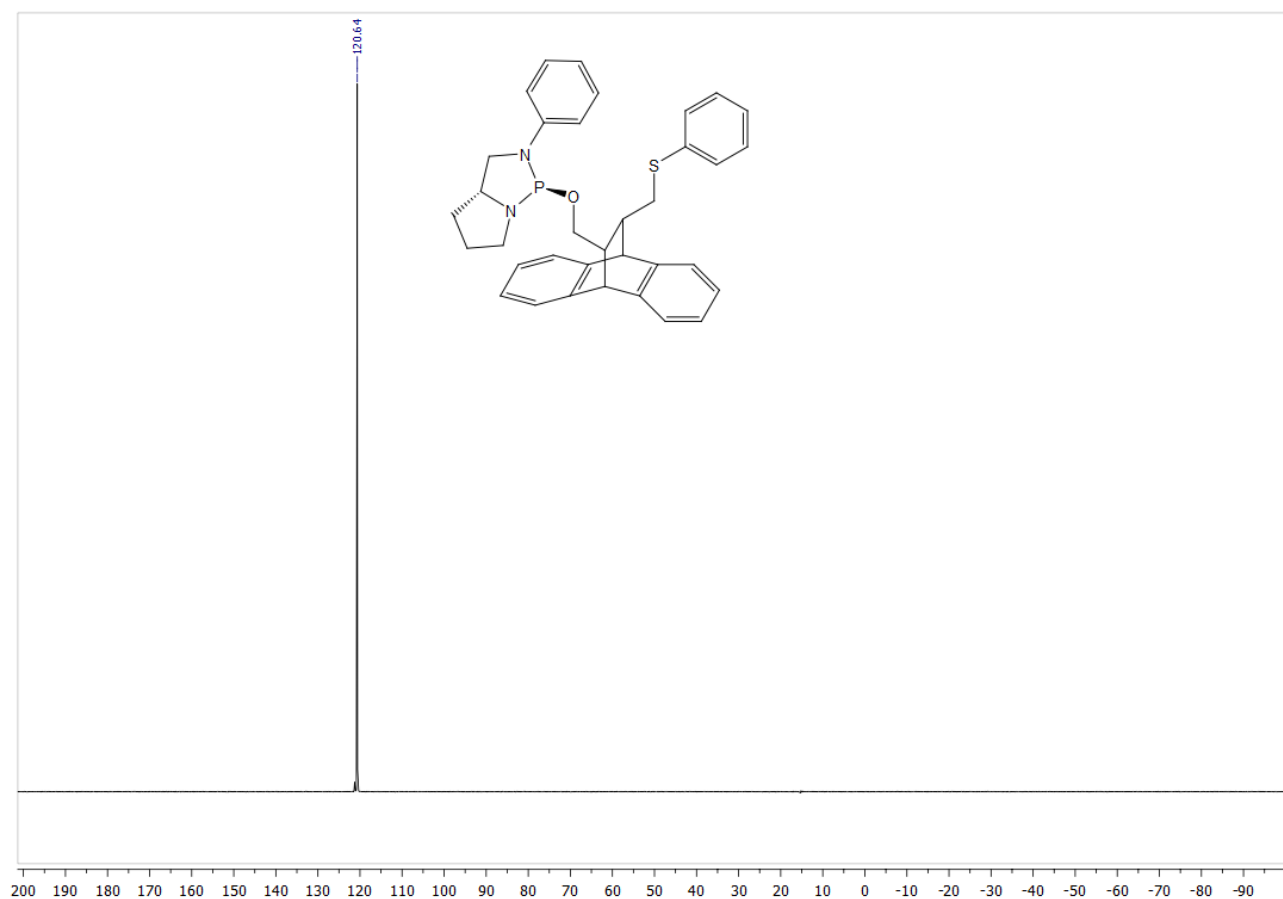

L5b,  $^{31}\text{P}\{^1\text{H}\}$  (242.9 MHz,  $\text{CDCl}_3$ , 30 °C).

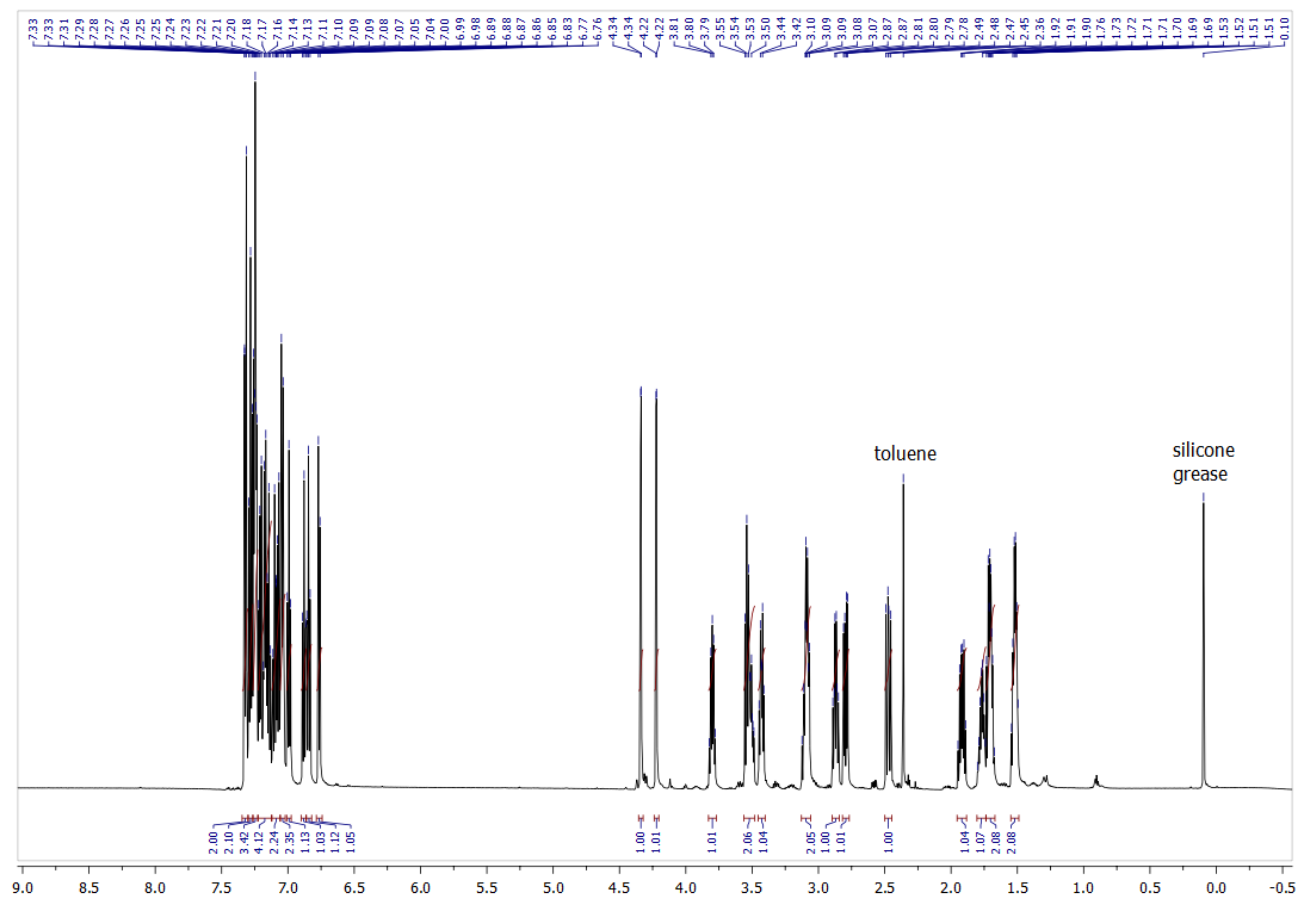

L5b,  $^1\text{H}$  (600.1 MHz,  $\text{CDCl}_3$ , 30 °C).

# NMR AND MASS SPECTRA

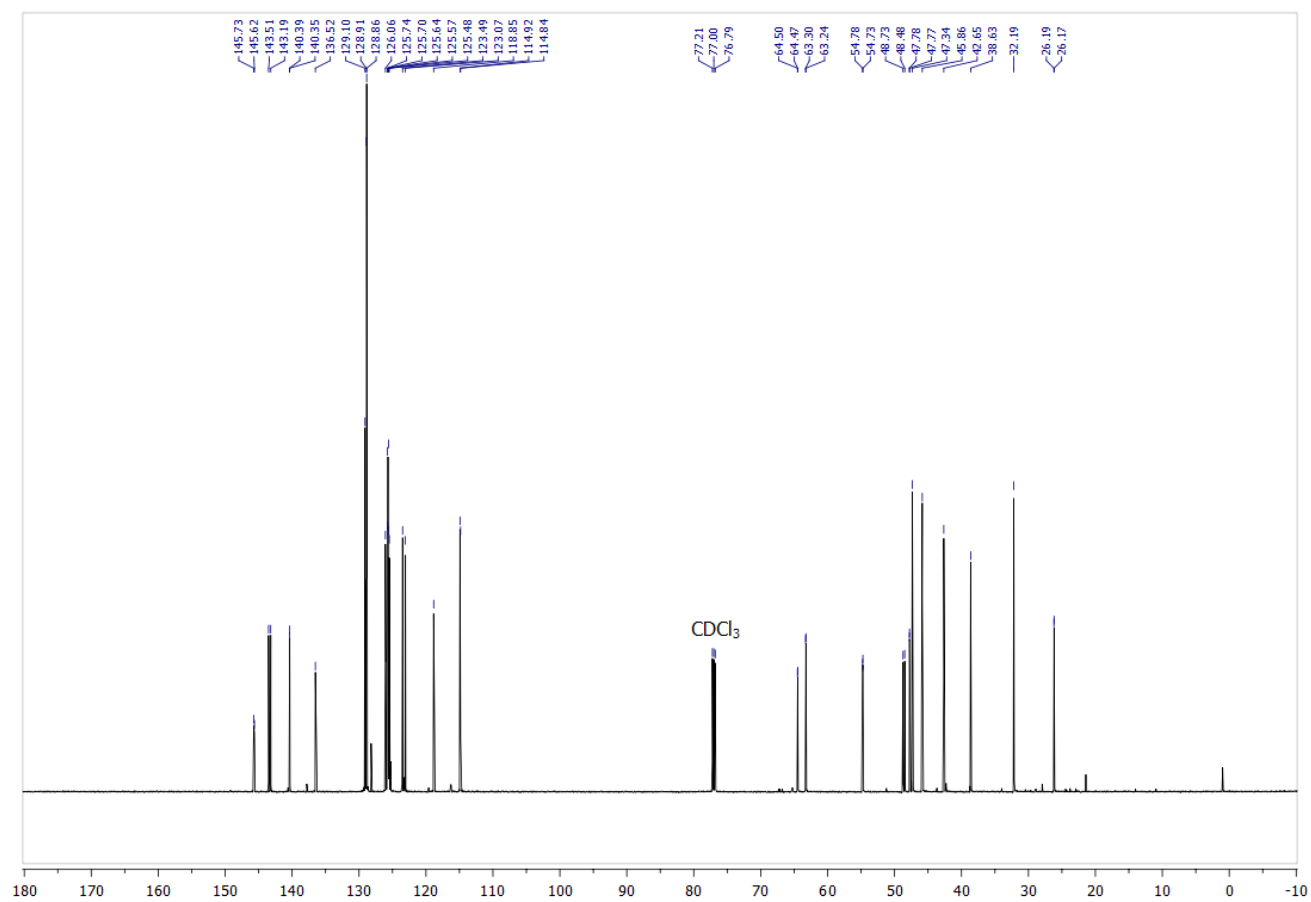

**L5b**,  $^{13}\text{C}\{^1\text{H}\}$  (150.9 MHz,  $\text{CDCl}_3$ , 30 °C).

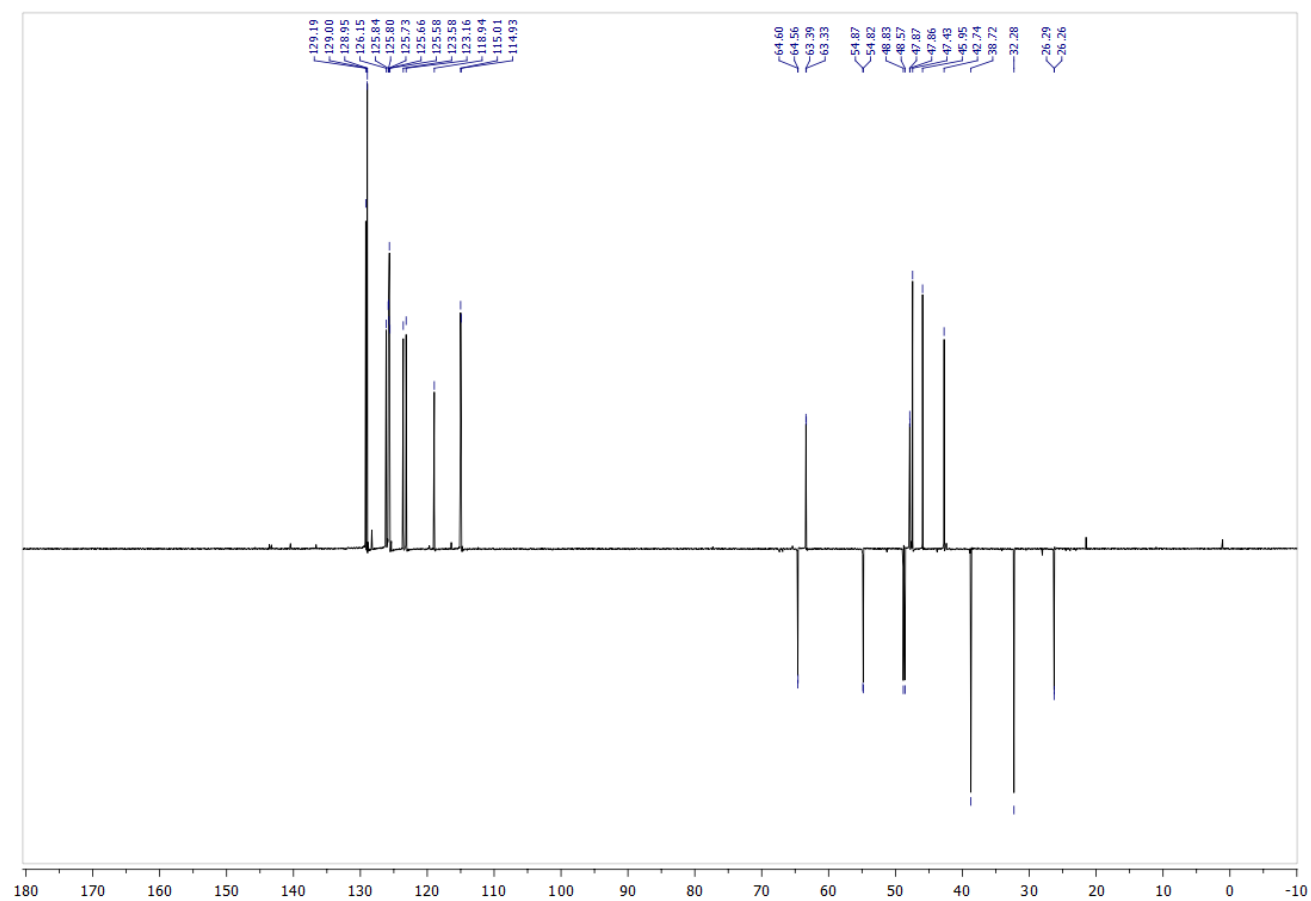

**L5b**,  $^{13}\text{C}\{^1\text{H}\}$  DEPT (150.9 MHz,  $\text{CDCl}_3$ , 30 °C).

# NMR AND MASS SPECTRA

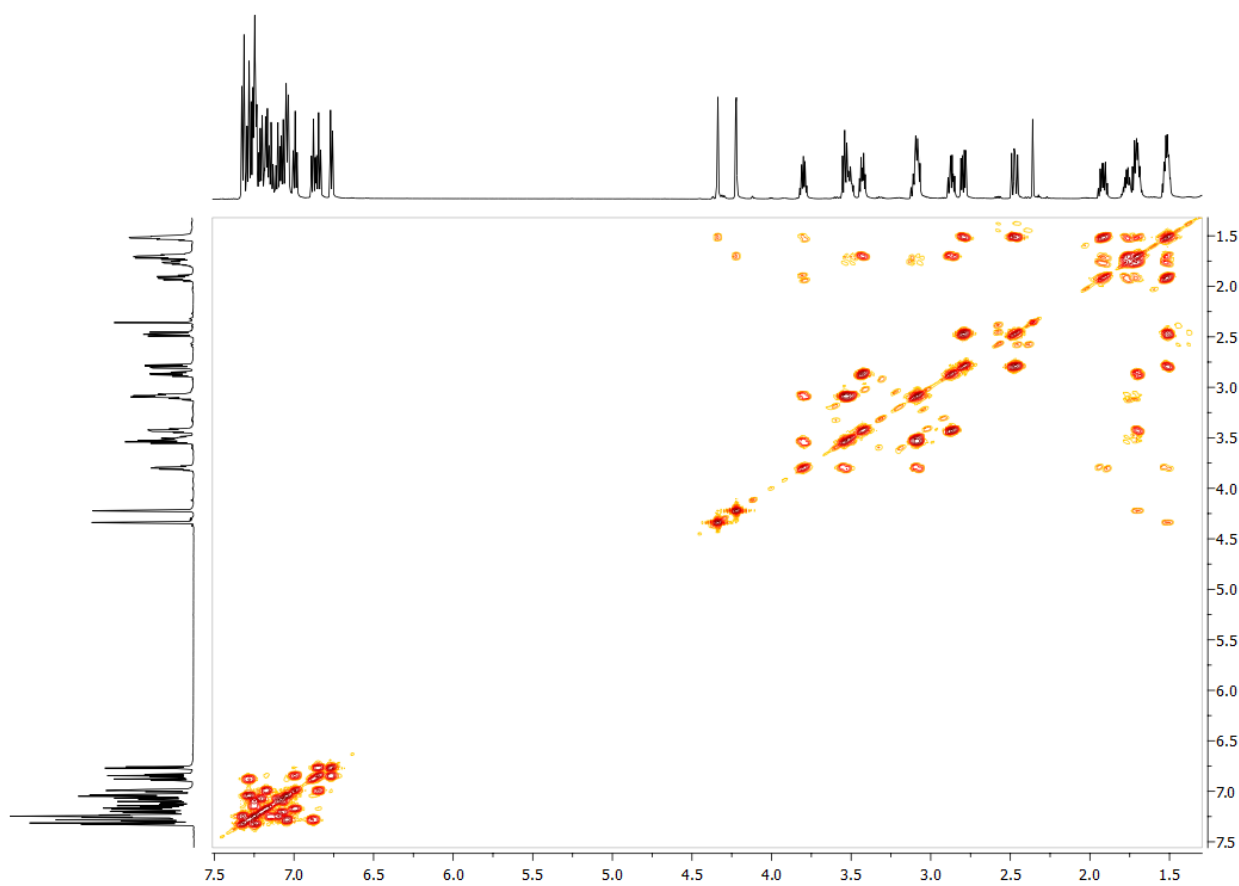

L5b,  $^1\text{H}$ - $^1\text{H}$  COSY.

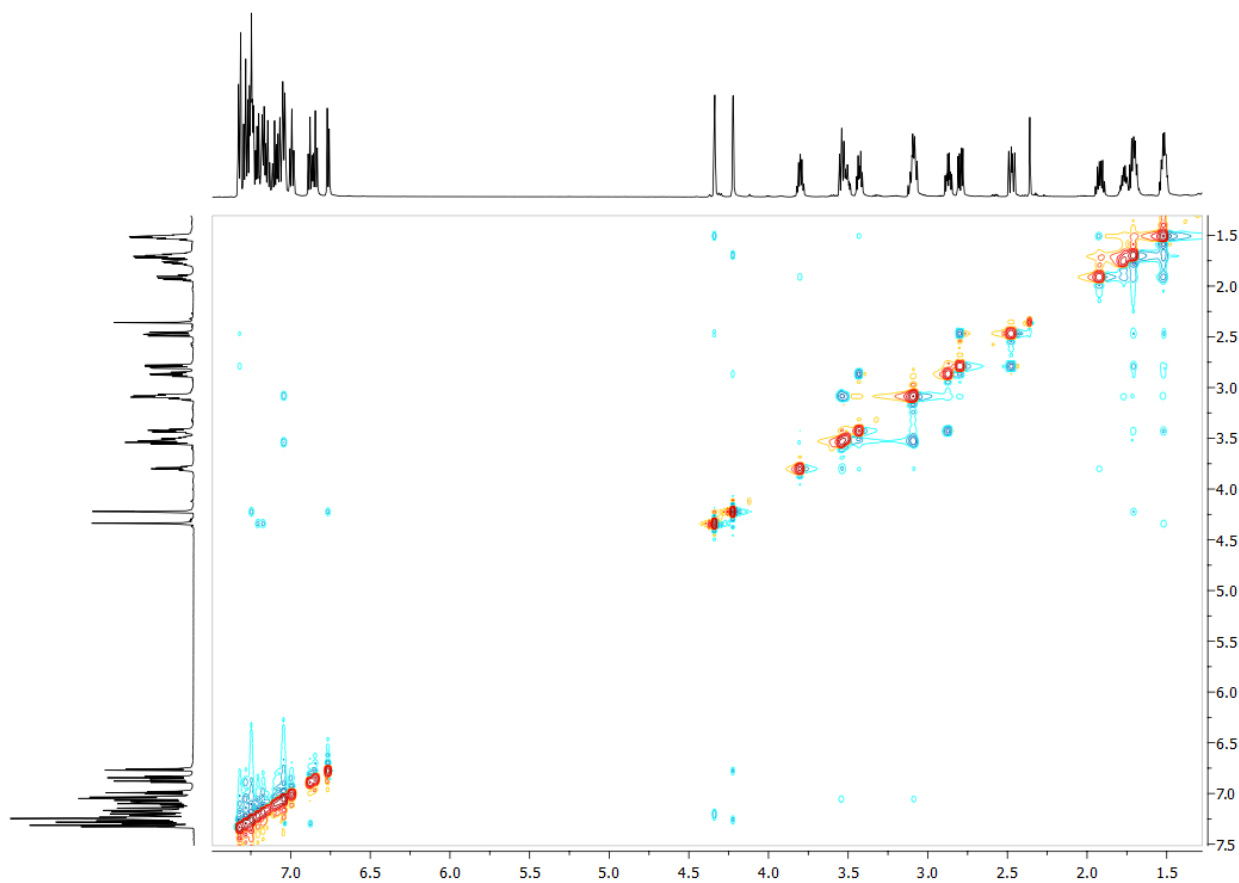

L5b,  $^1\text{H}$ - $^1\text{H}$  NOESY.

# NMR AND MASS SPECTRA

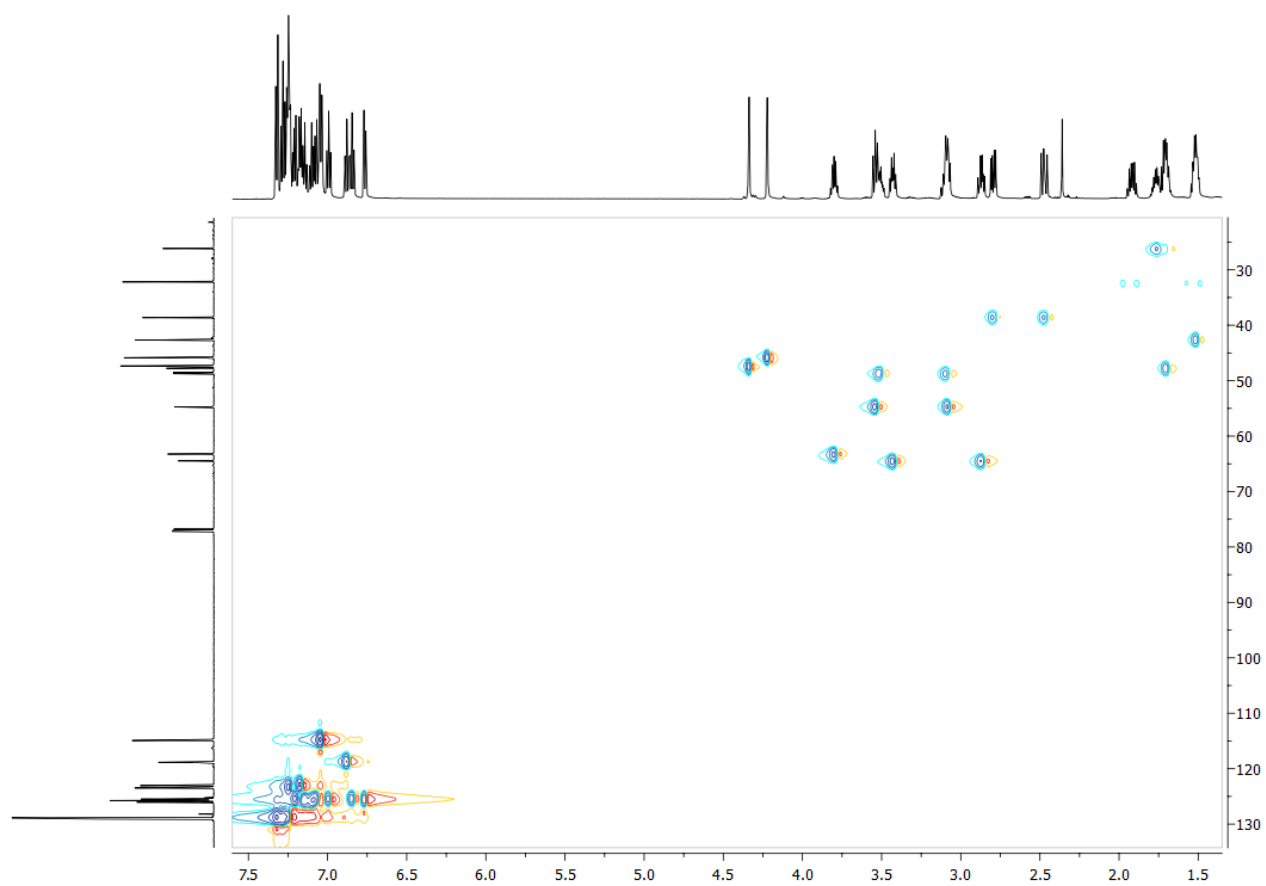

L5b,  $^1\text{H}$ - $^{13}\text{C}$  HSQC.

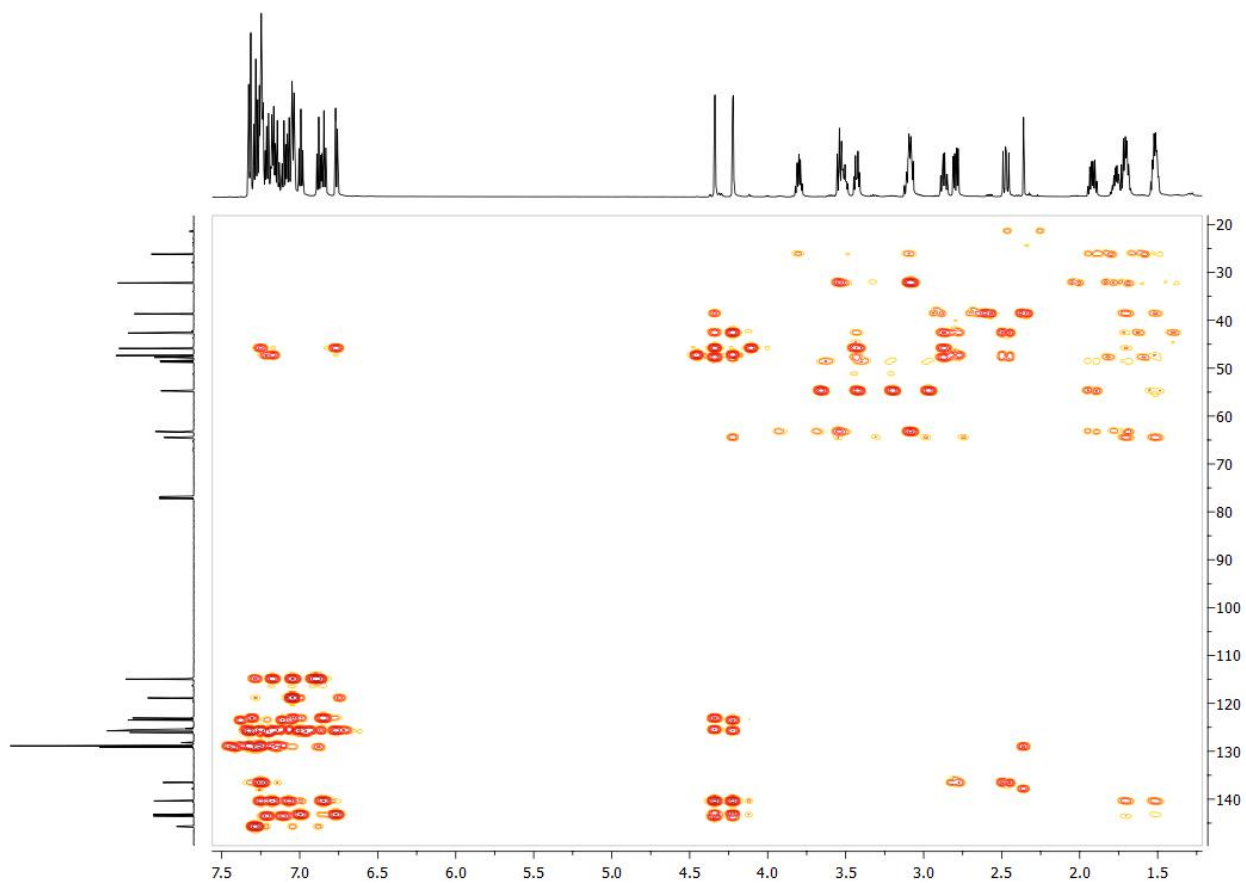

L5b,  $^1\text{H}$ - $^{13}\text{C}$  HMBC.



# NMR AND MASS SPECTRA

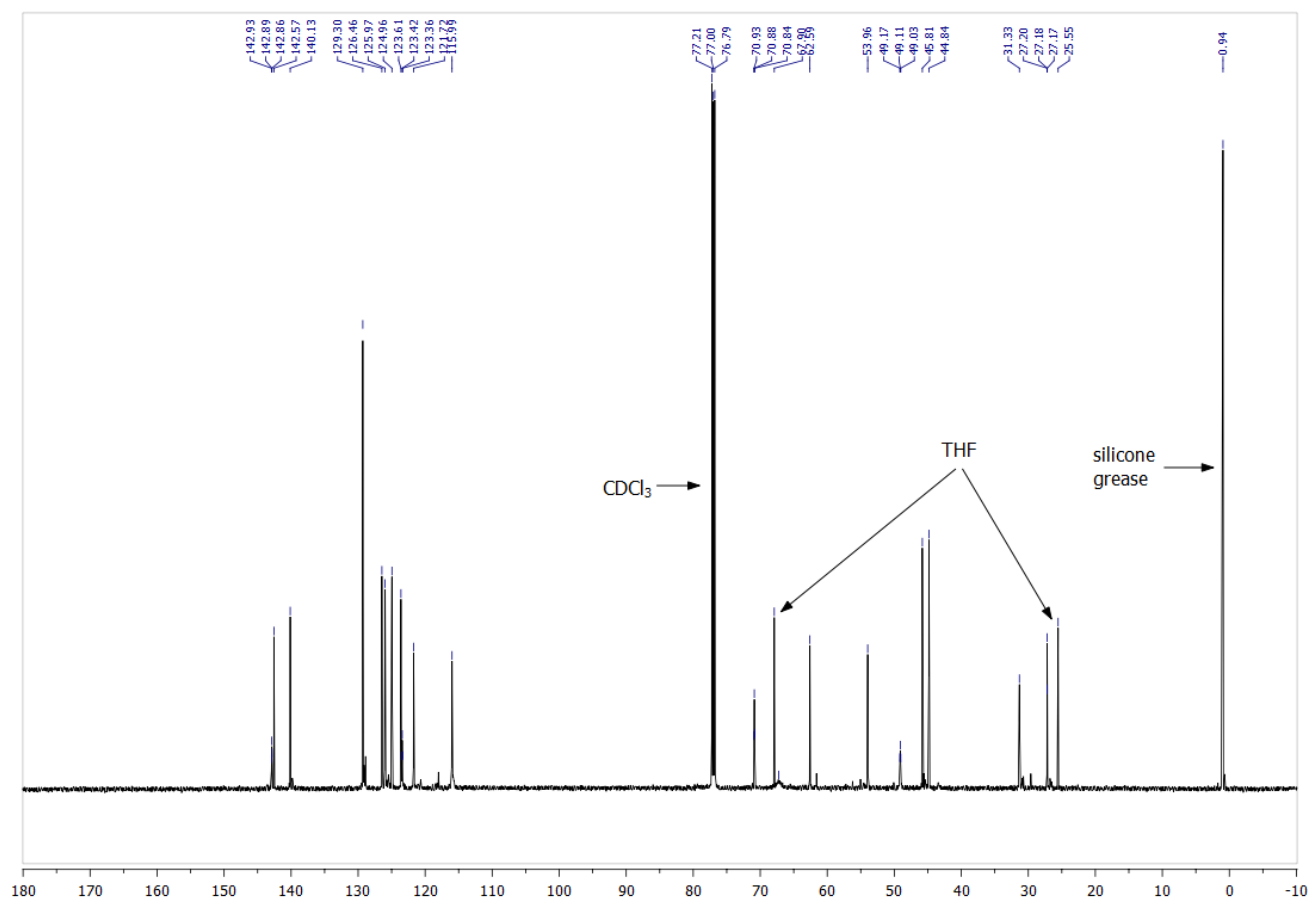

$[\text{Pd}(\text{allyl})(\text{L1a})]\text{BF}_4$ ,  $^{13}\text{C}\{^1\text{H}\}$  (150.9 MHz,  $\text{CDCl}_3$ , 30 °C).

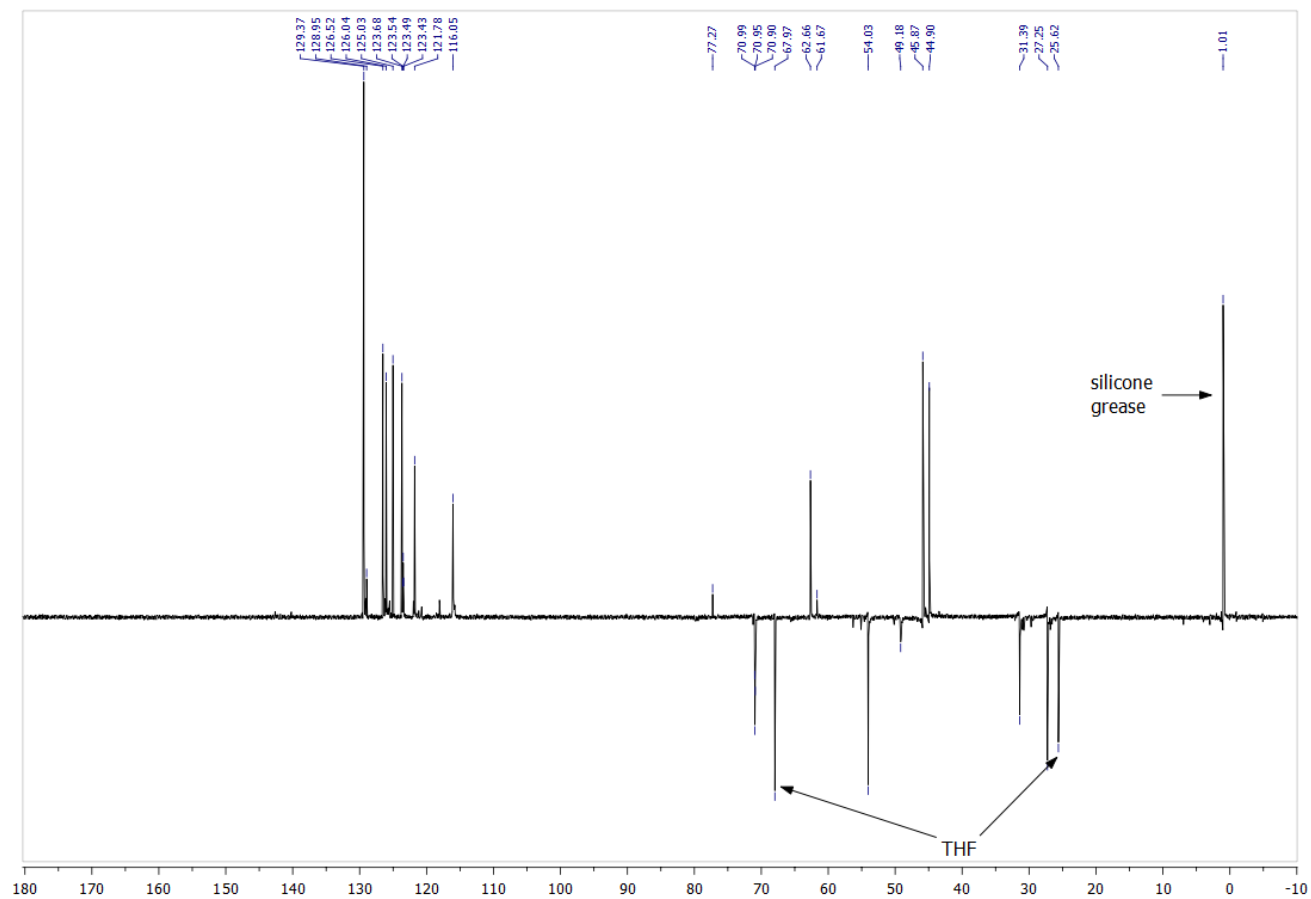

$[\text{Pd}(\text{allyl})(\text{L1a})]\text{BF}_4$ ,  $^{13}\text{C}\{^1\text{H}\}$  DEPT (150.9 MHz,  $\text{CDCl}_3$ , 30 °C).



# NMR AND MASS SPECTRA

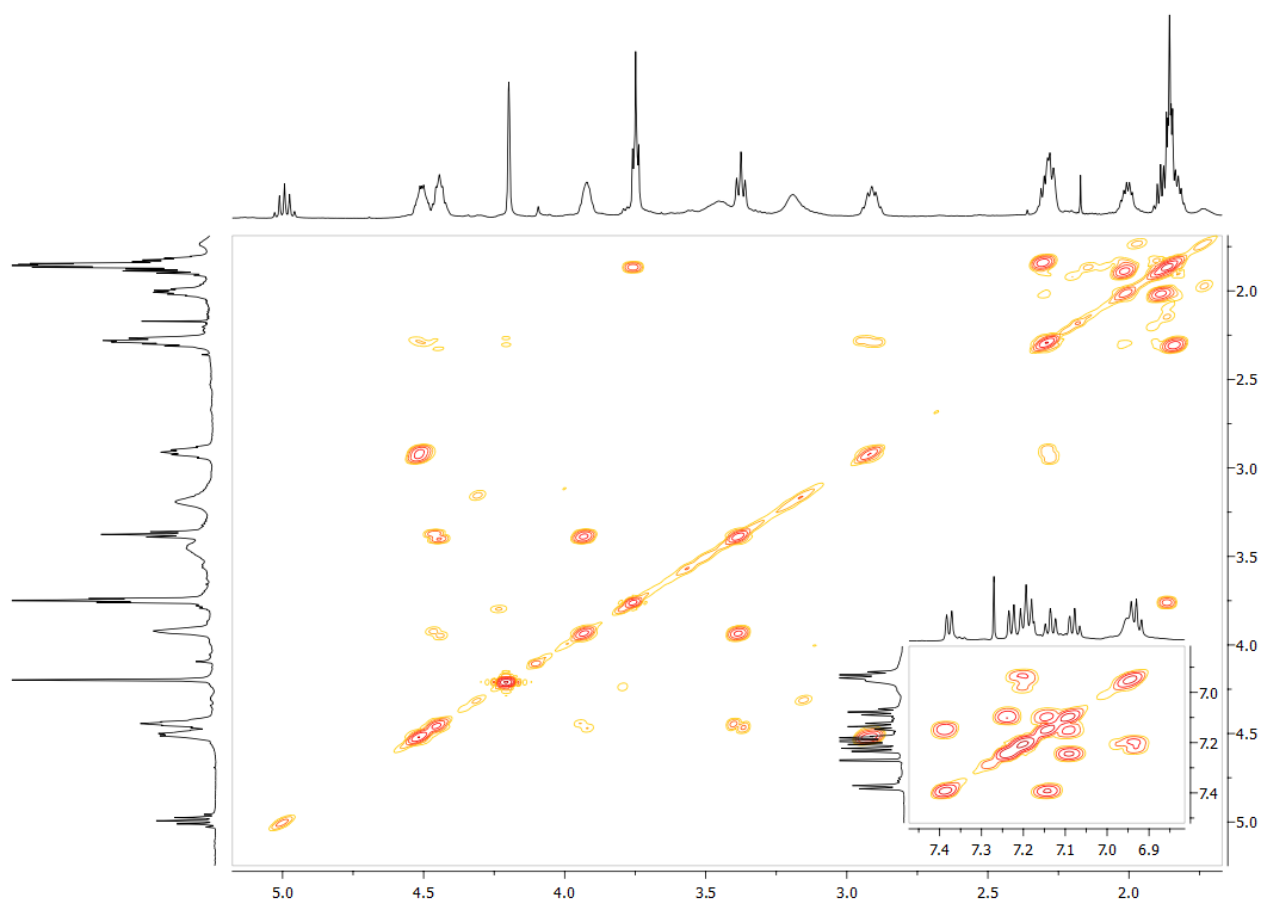

[Pd(allyl)(L1a)]BF<sub>4</sub>, <sup>1</sup>H-<sup>1</sup>H COSY.

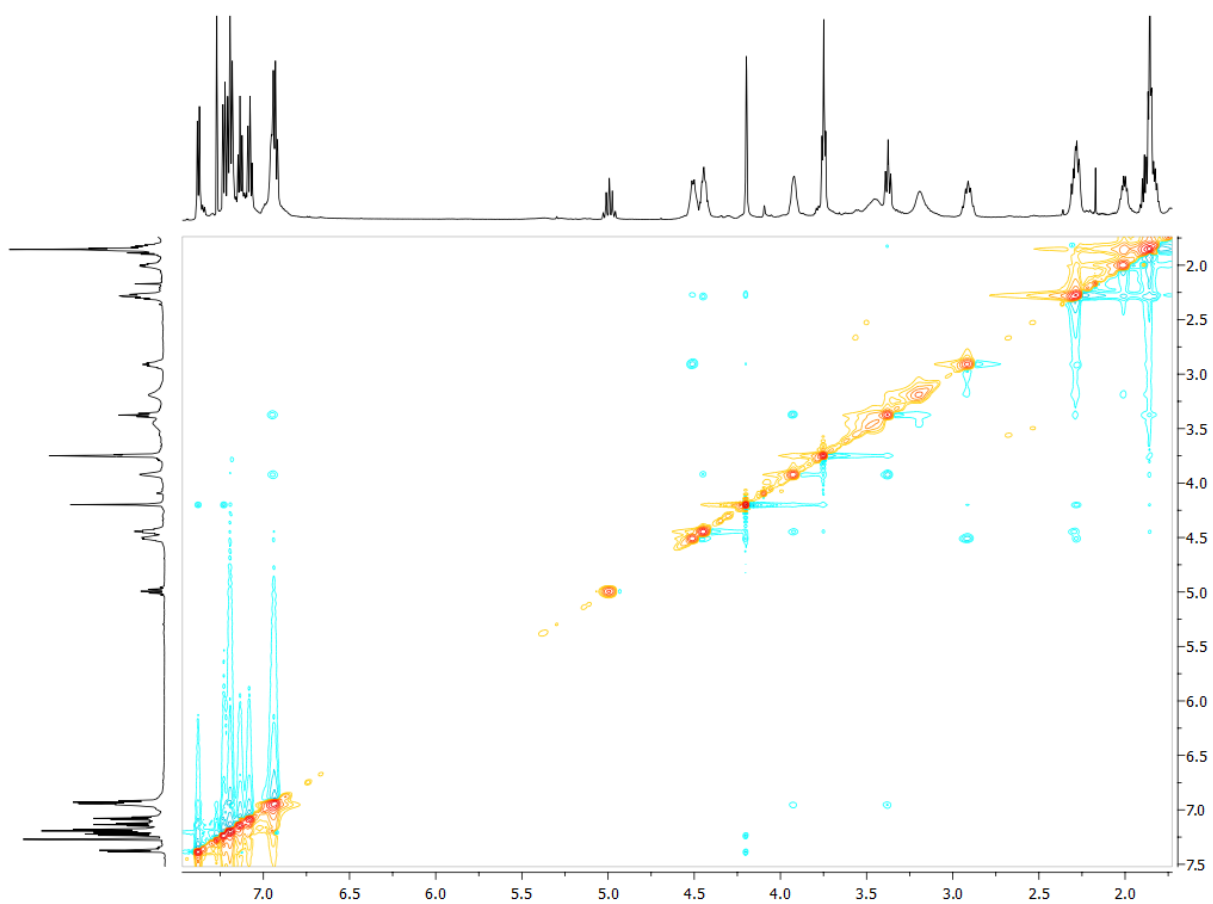

[Pd(allyl)(L1a)]BF<sub>4</sub>, <sup>1</sup>H-<sup>1</sup>H NOESY.

## NMR AND MASS SPECTRA

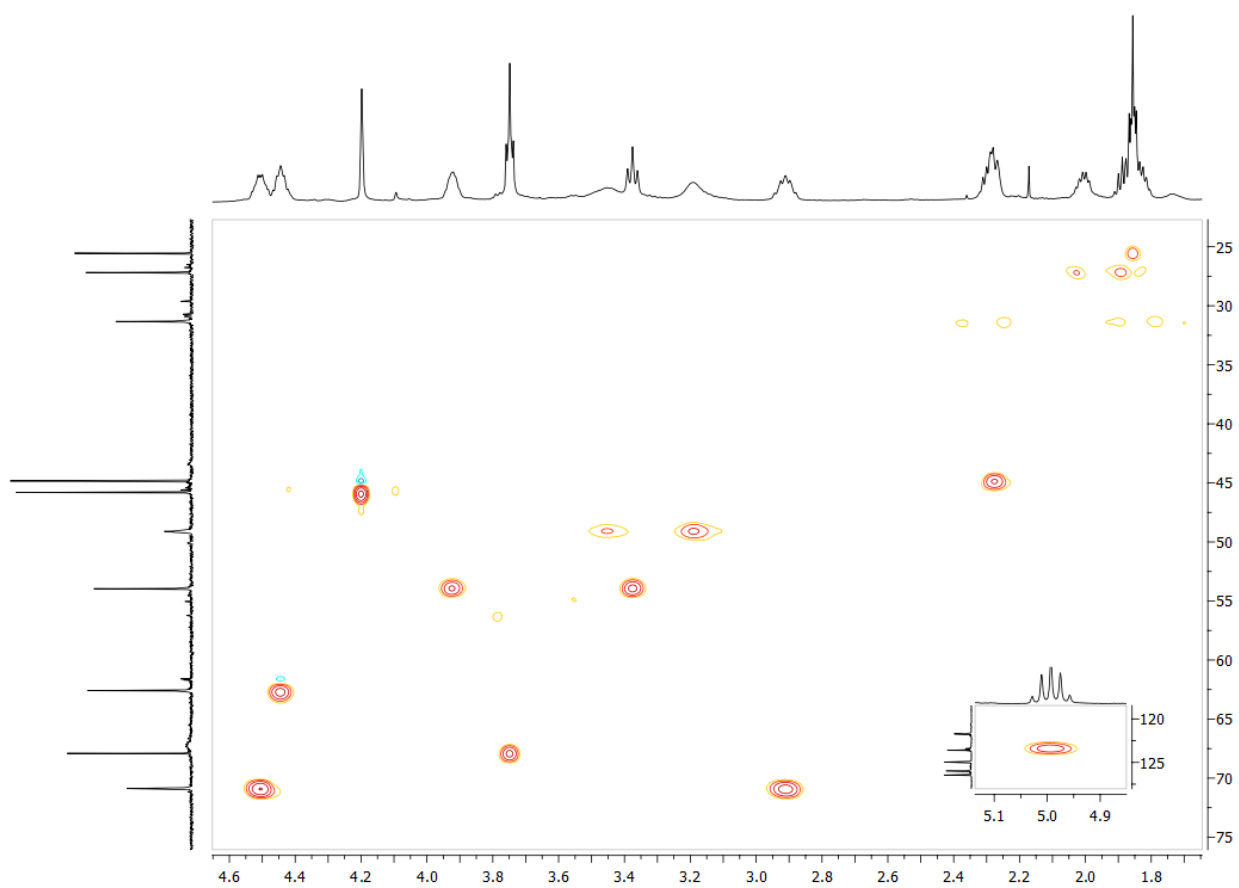

[Pd(allyl)(L1a)]BF<sub>4</sub>,  $^1\text{H}$ - $^{13}\text{C}$  HSQC (fragment of the spectrum).

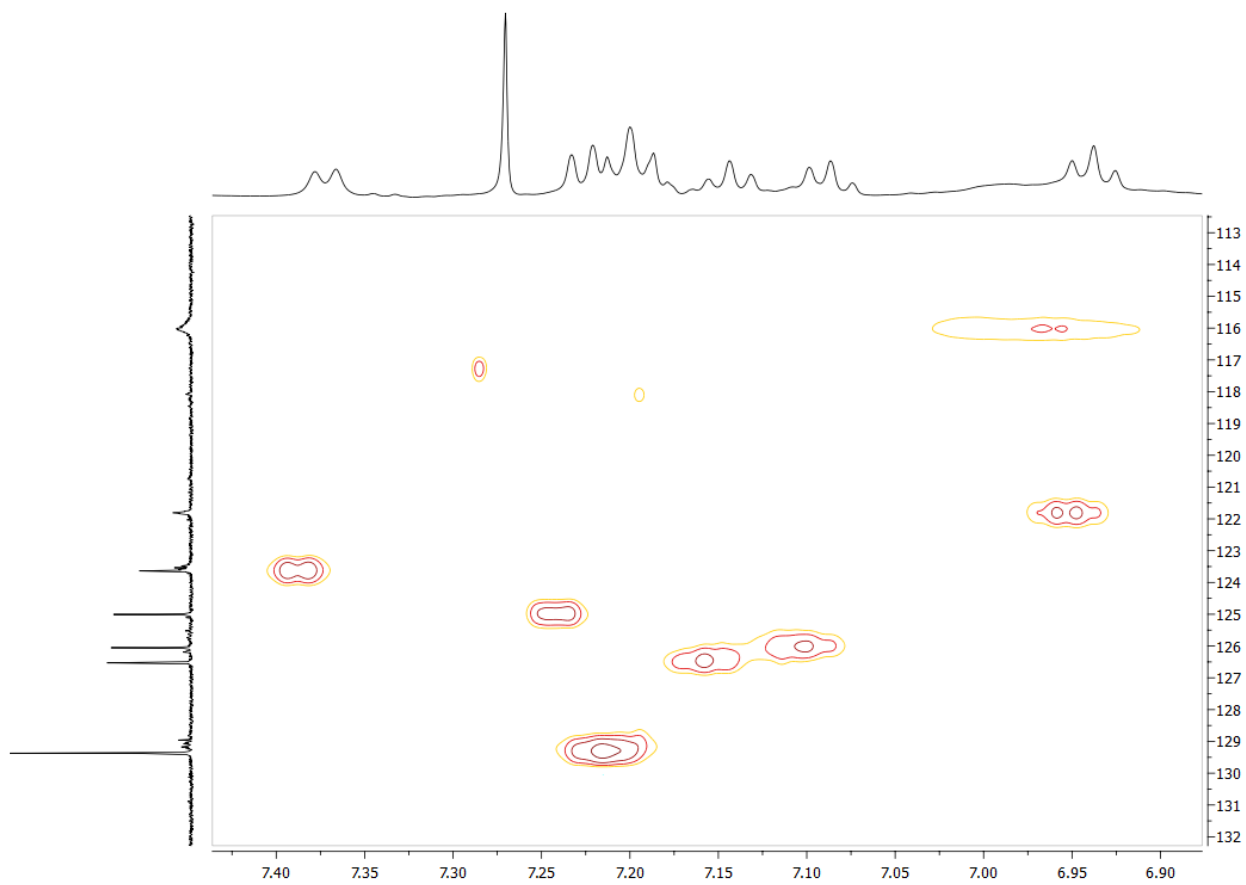

[Pd(allyl)(L1a)]BF<sub>4</sub>,  $^1\text{H}$ - $^{13}\text{C}$  HSQC (fragment of the spectrum).

## NMR AND MASS SPECTRA

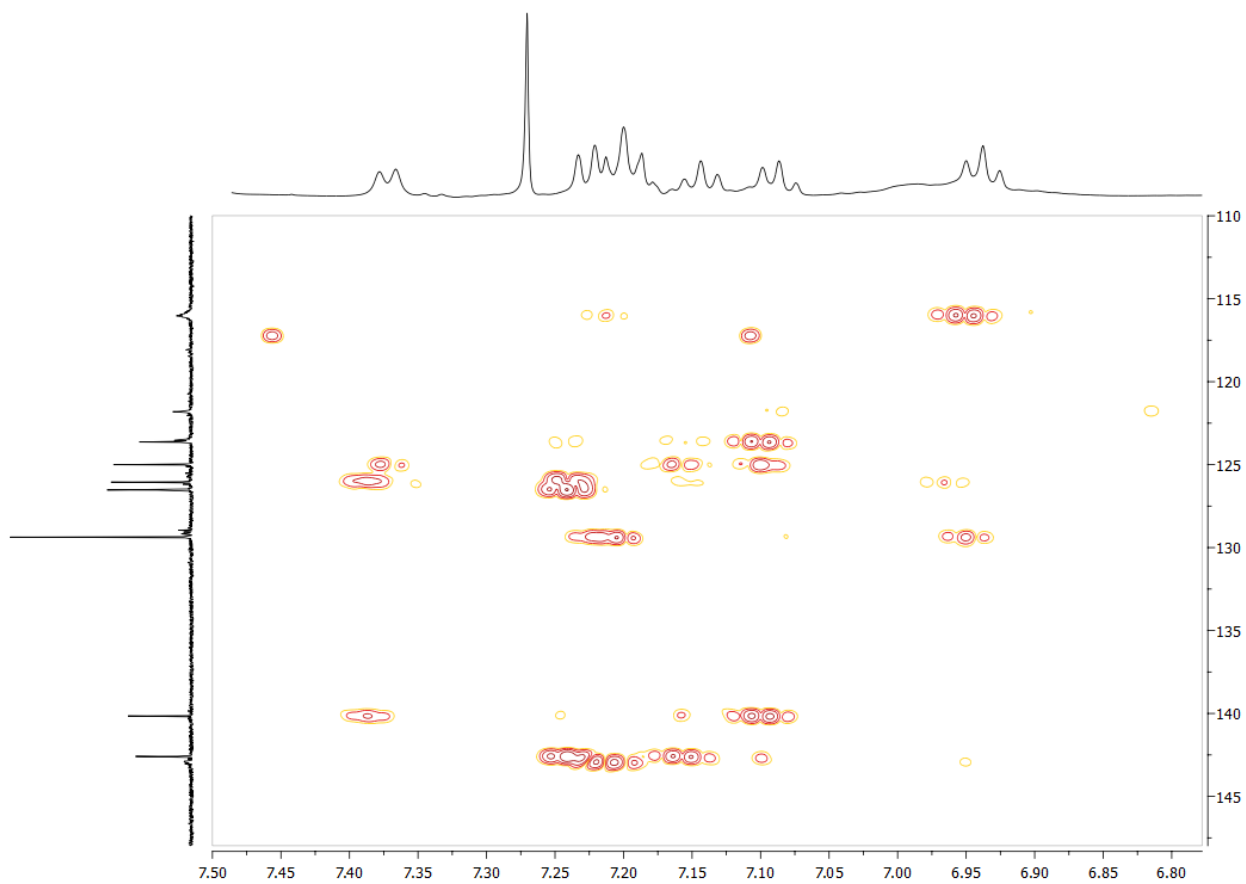

[Pd(allyl)(L1a)]BF<sub>4</sub>, <sup>1</sup>H-<sup>13</sup>C HMBC (fragment of the spectrum).

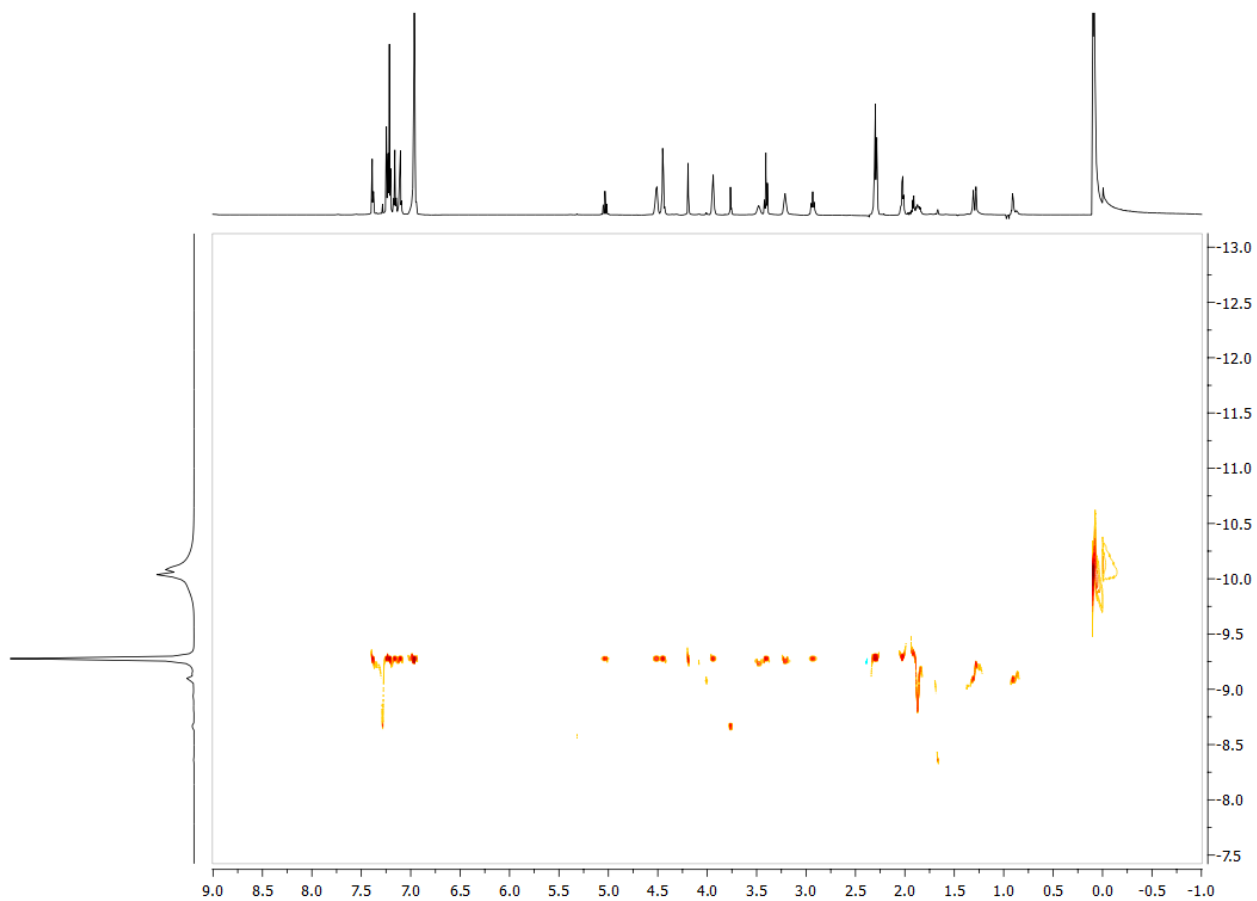

[Pd(allyl)(L1a)]BF<sub>4</sub>, DOSY.

# NMR AND MASS SPECTRA

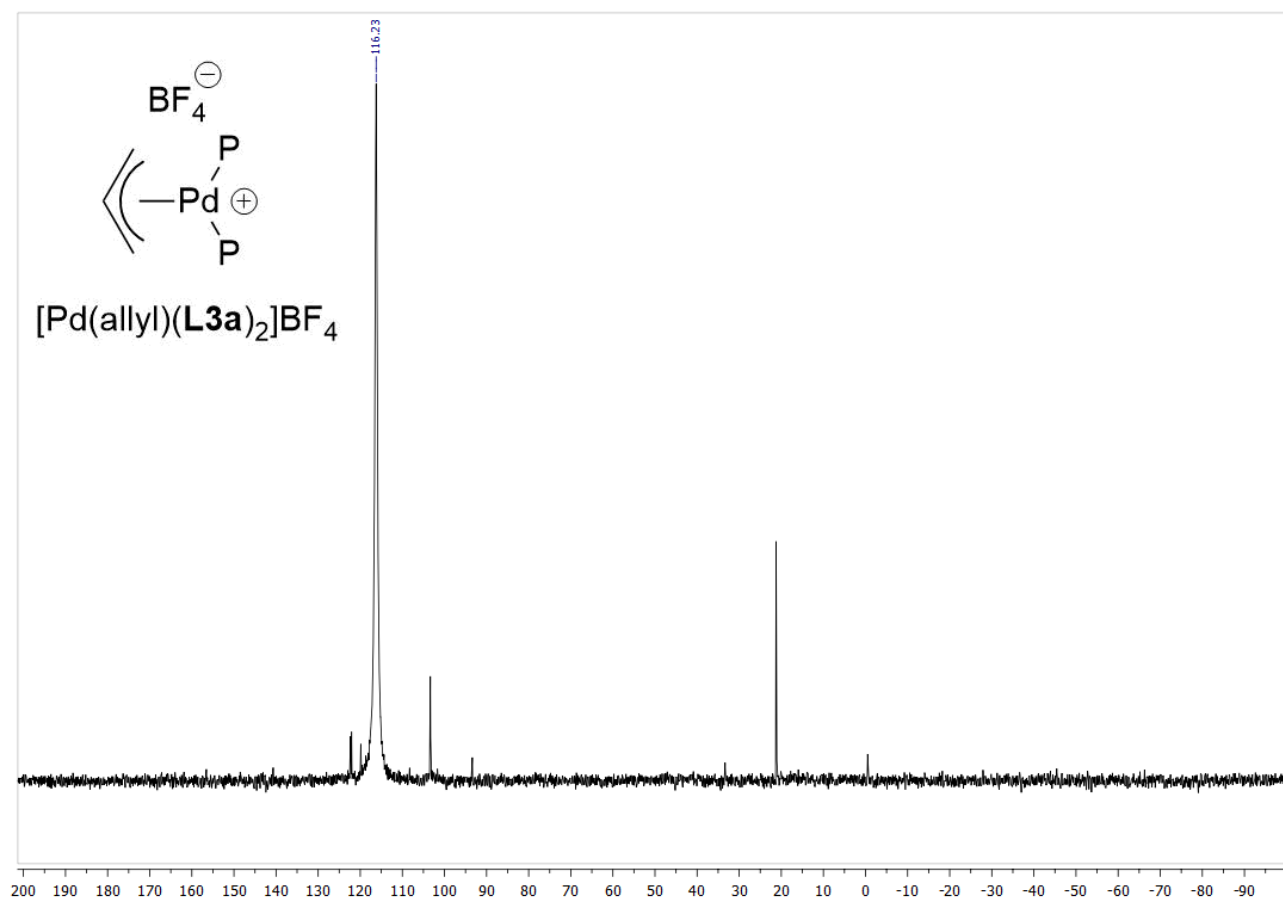

$[Pd(allyl)(L3a)_2]BF_4$ ,  $^{31}P\{^1H\}$  (242.9 MHz,  $CDCl_3$ , 30 °C).

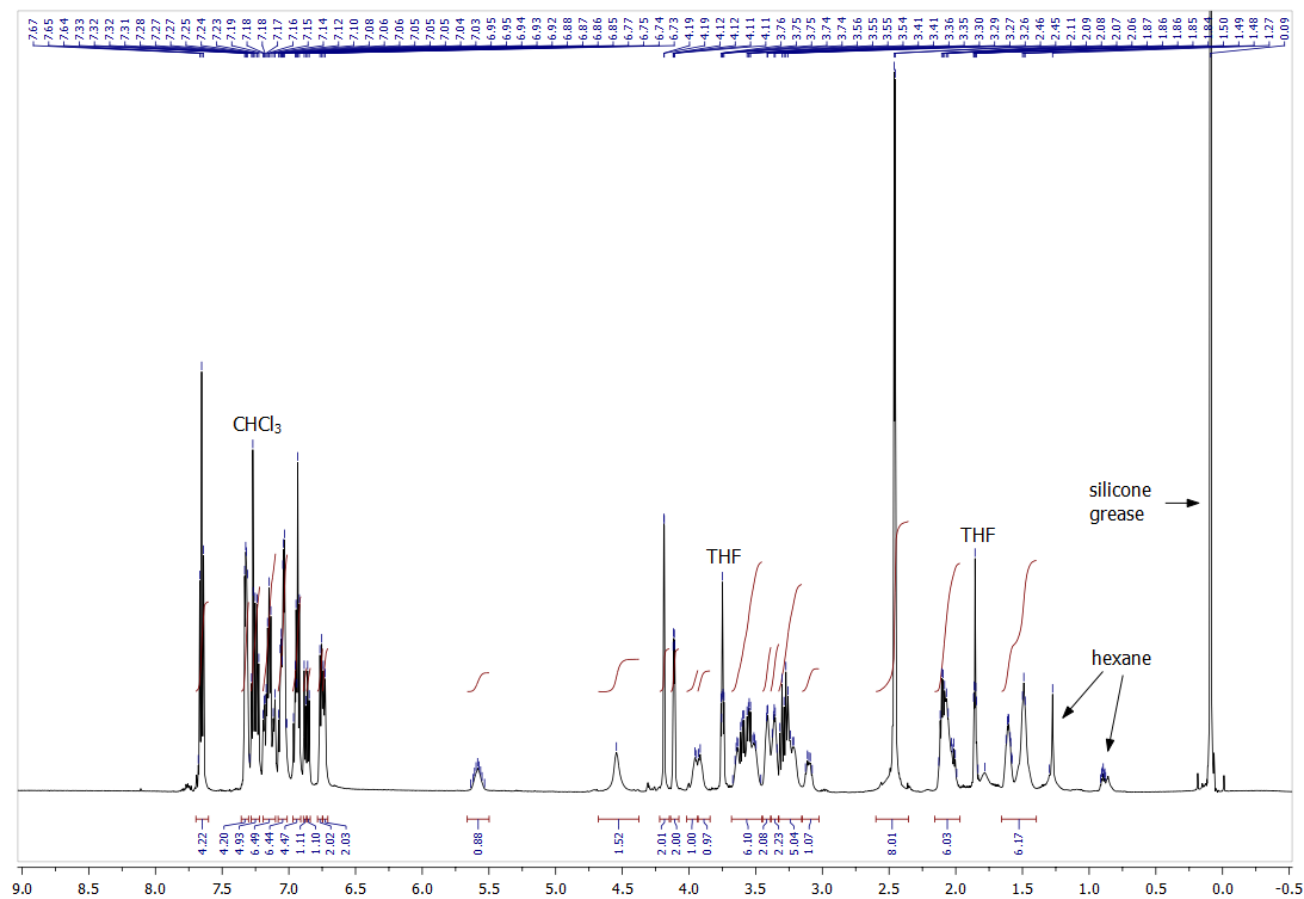

$[Pd(allyl)(L3a)_2]BF_4$ ,  $^1H$  (600.1 MHz,  $CDCl_3$ , 30 °C).

# NMR AND MASS SPECTRA

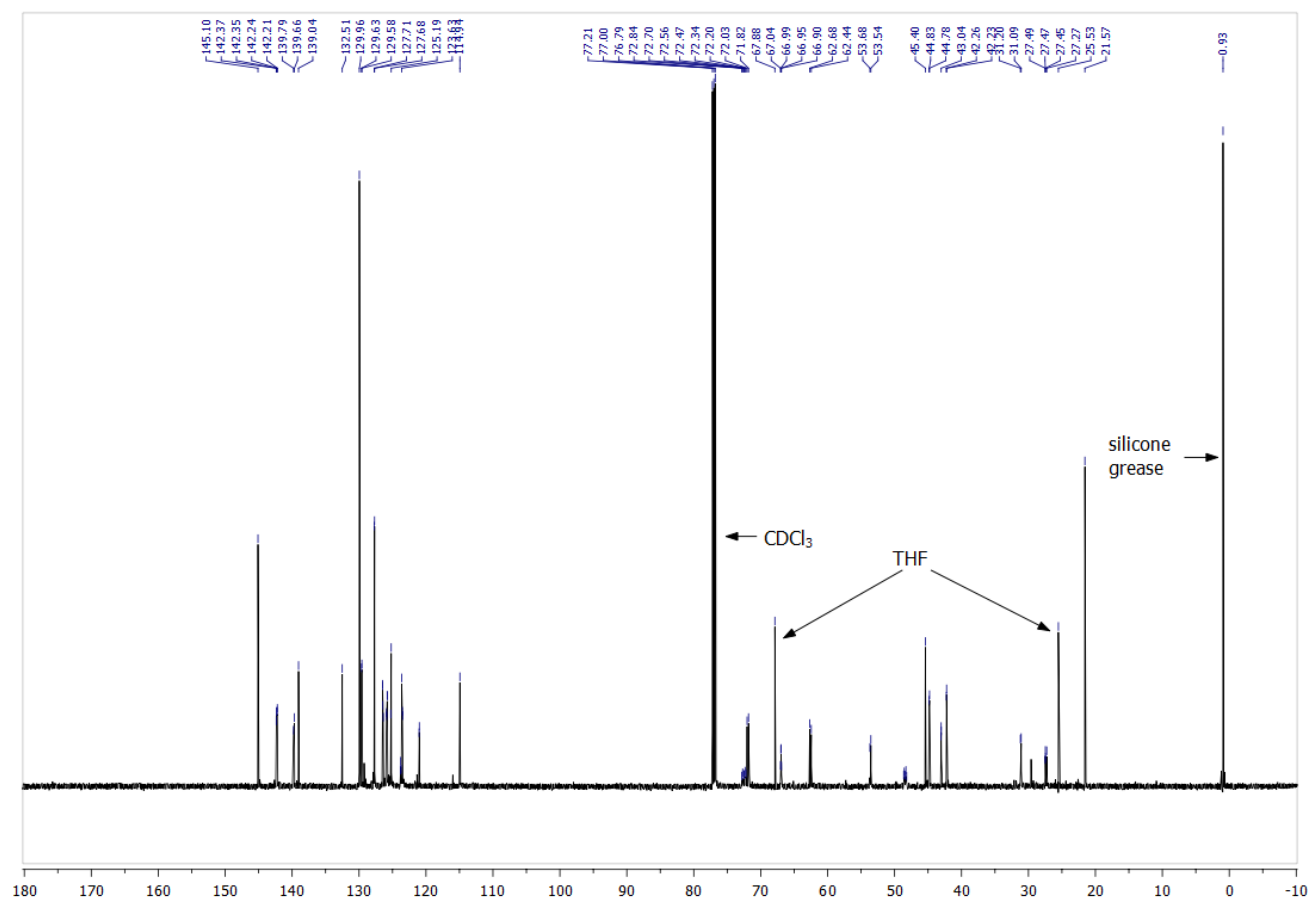

$[\text{Pd}(\text{allyl})(\text{L3a})_2]\text{BF}_4$ ,  $^{13}\text{C}\{^1\text{H}\}$  (150.9 MHz,  $\text{CDCl}_3$ , 30 °C).

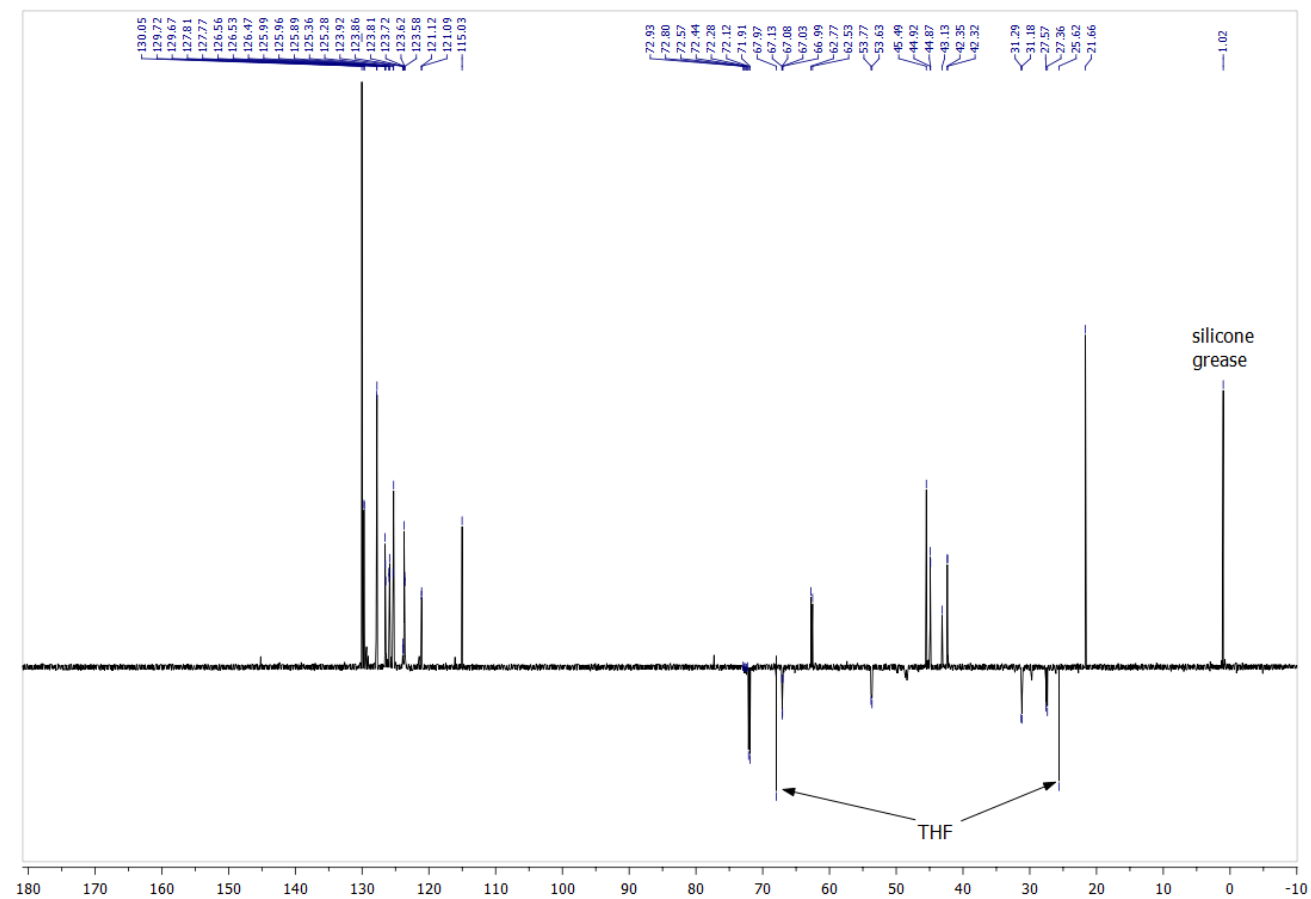

$[\text{Pd}(\text{allyl})(\text{L3a})_2]\text{BF}_4$ ,  $^{13}\text{C}\{^1\text{H}\}$  DEPT (150.9 MHz,  $\text{CDCl}_3$ , 30 °C).

# NMR AND MASS SPECTRA

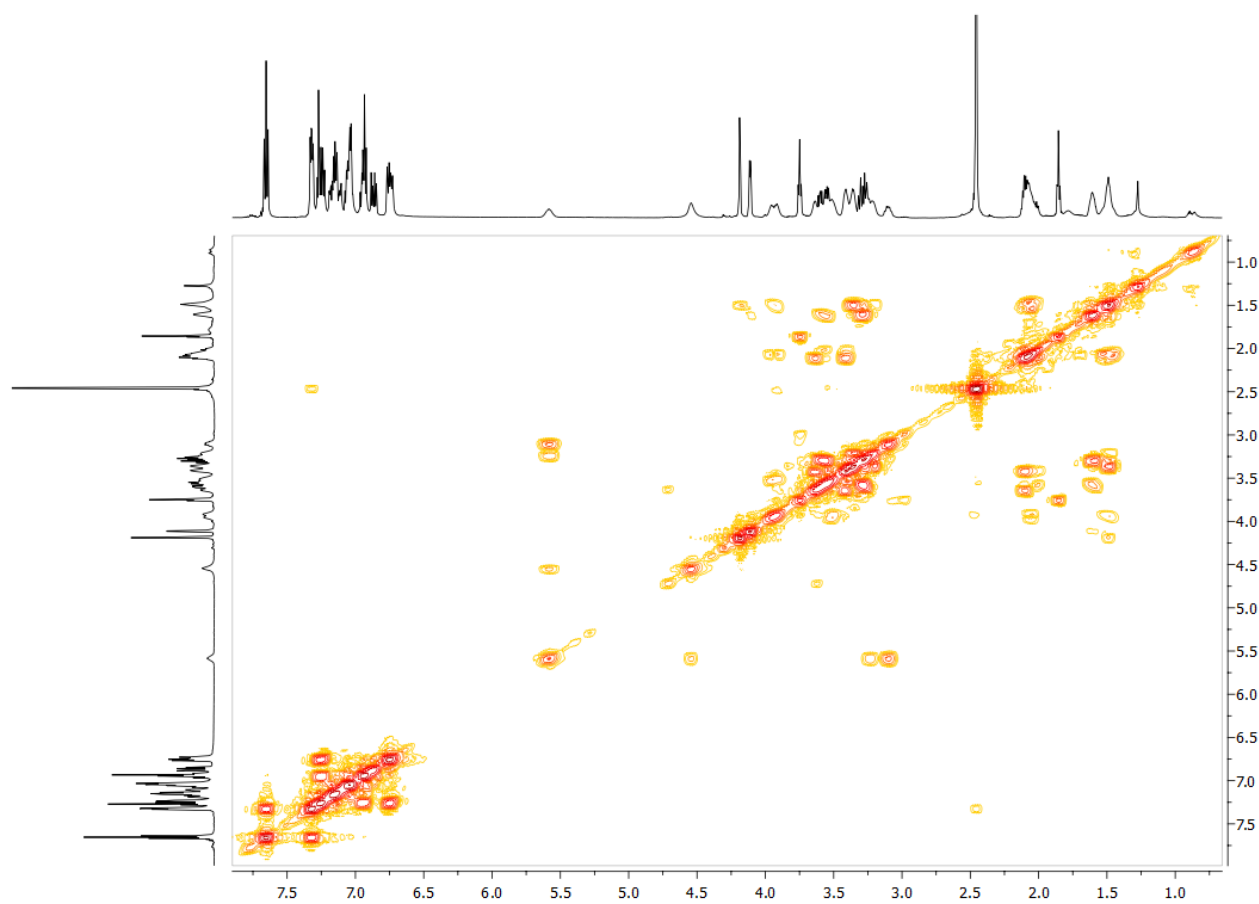

[Pd(allyl)(L3a)<sub>2</sub>]BF<sub>4</sub>, <sup>1</sup>H-<sup>1</sup>H COSY.

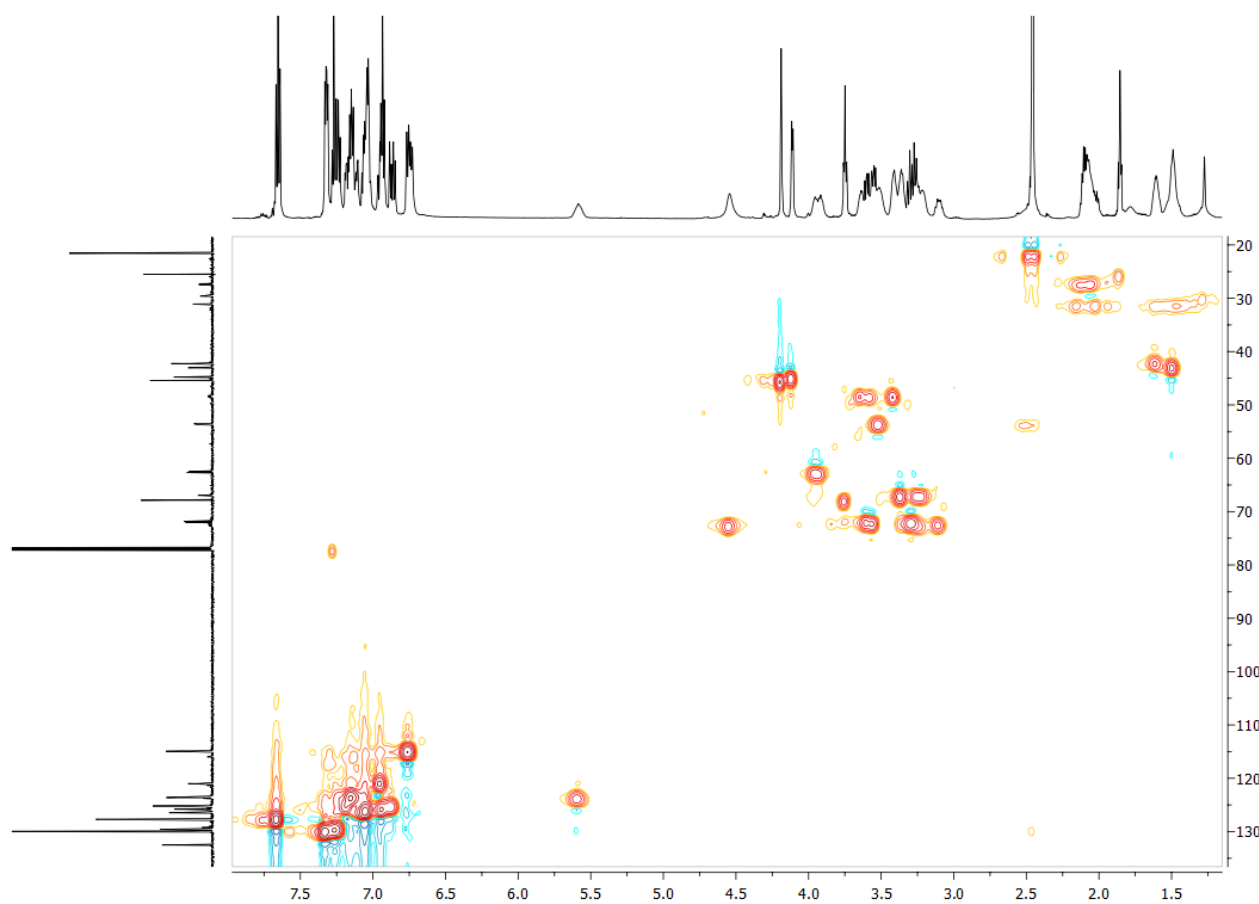

[Pd(allyl)(L3a)<sub>2</sub>]BF<sub>4</sub>, <sup>1</sup>H-<sup>13</sup>C HSQC.

# NMR AND MASS SPECTRA

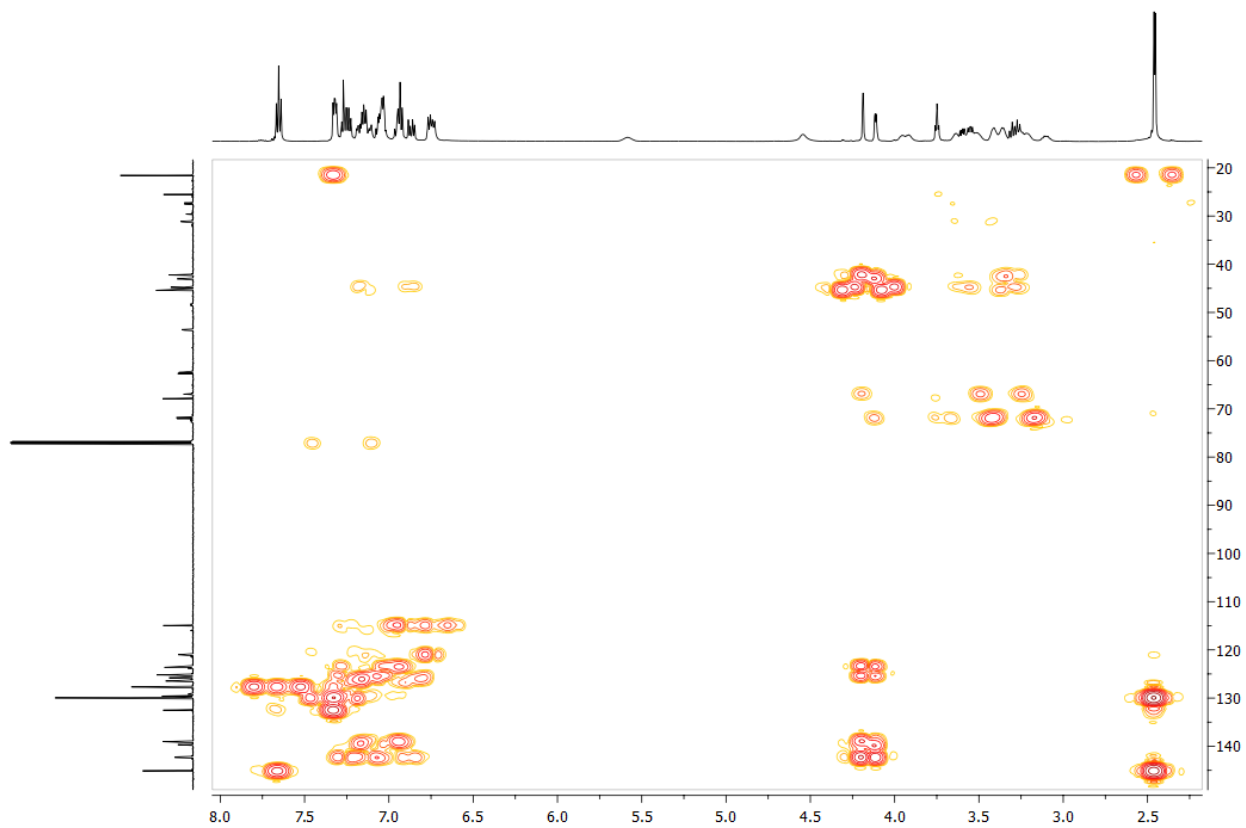

$[\text{Pd}(\text{allyl})(\text{L3a})_2]\text{BF}_4$ ,  $^1\text{H}$ - $^{13}\text{C}$  HMBC.

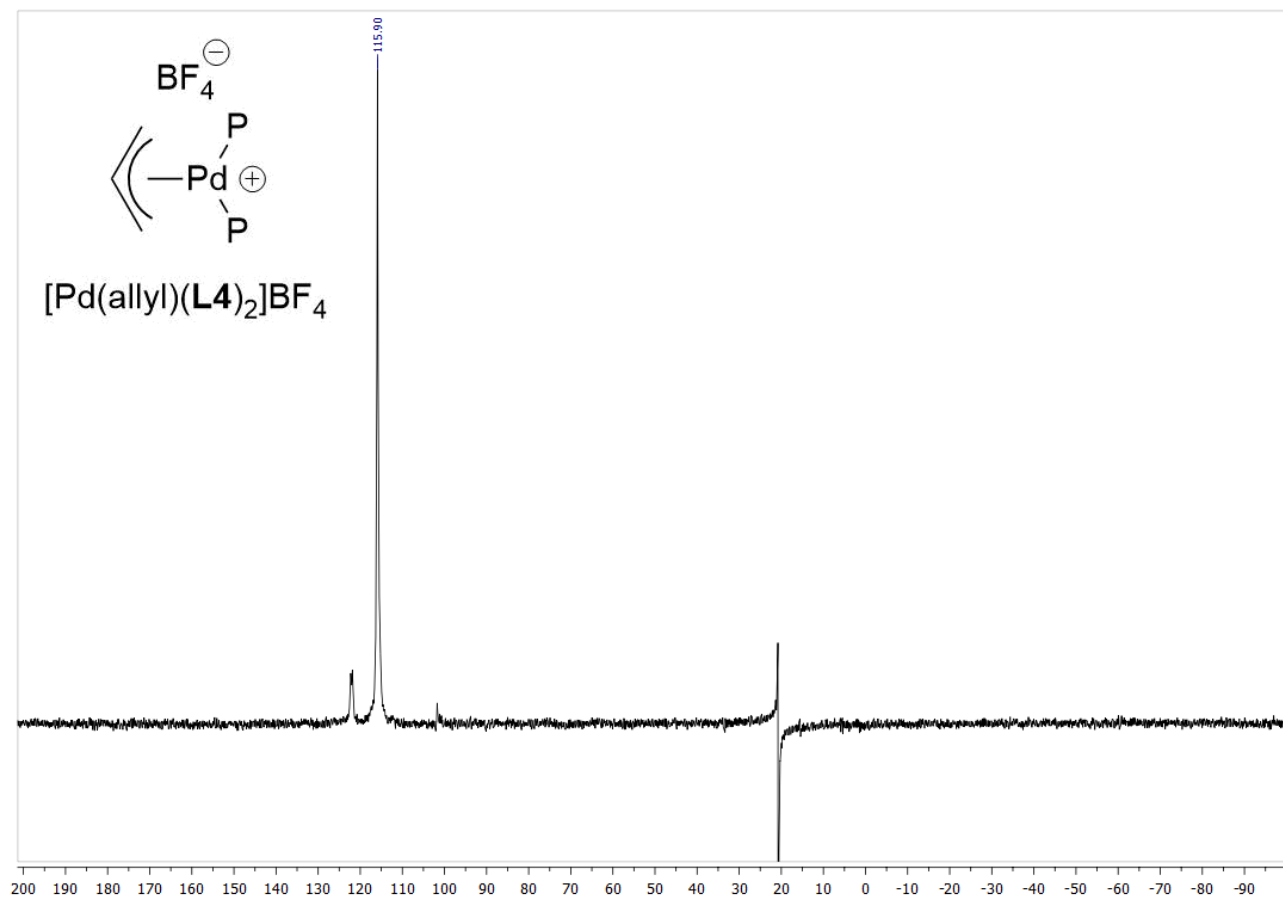

$[\text{Pd}(\text{allyl})(\text{L4})_2]\text{BF}_4$ ,  $^{31}\text{P}\{^1\text{H}\}$  (242.9 MHz,  $\text{CDCl}_3$ , 30 °C).

# NMR AND MASS SPECTRA

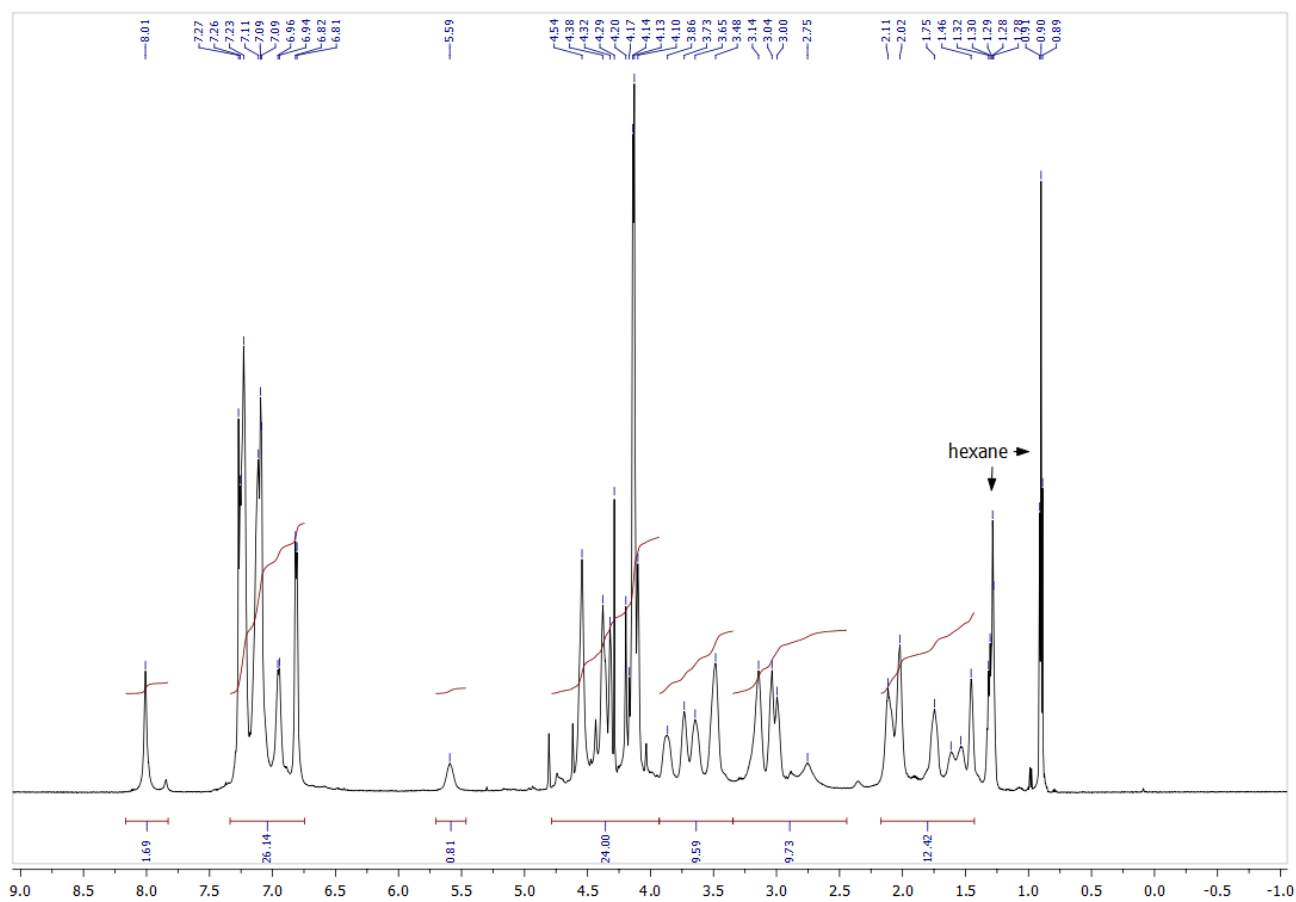

$[\text{Pd}(\text{allyl})(\text{L4})_2]\text{BF}_4$ ,  $^1\text{H}$  (600.1 MHz,  $\text{CDCl}_3$ , 30 °C).

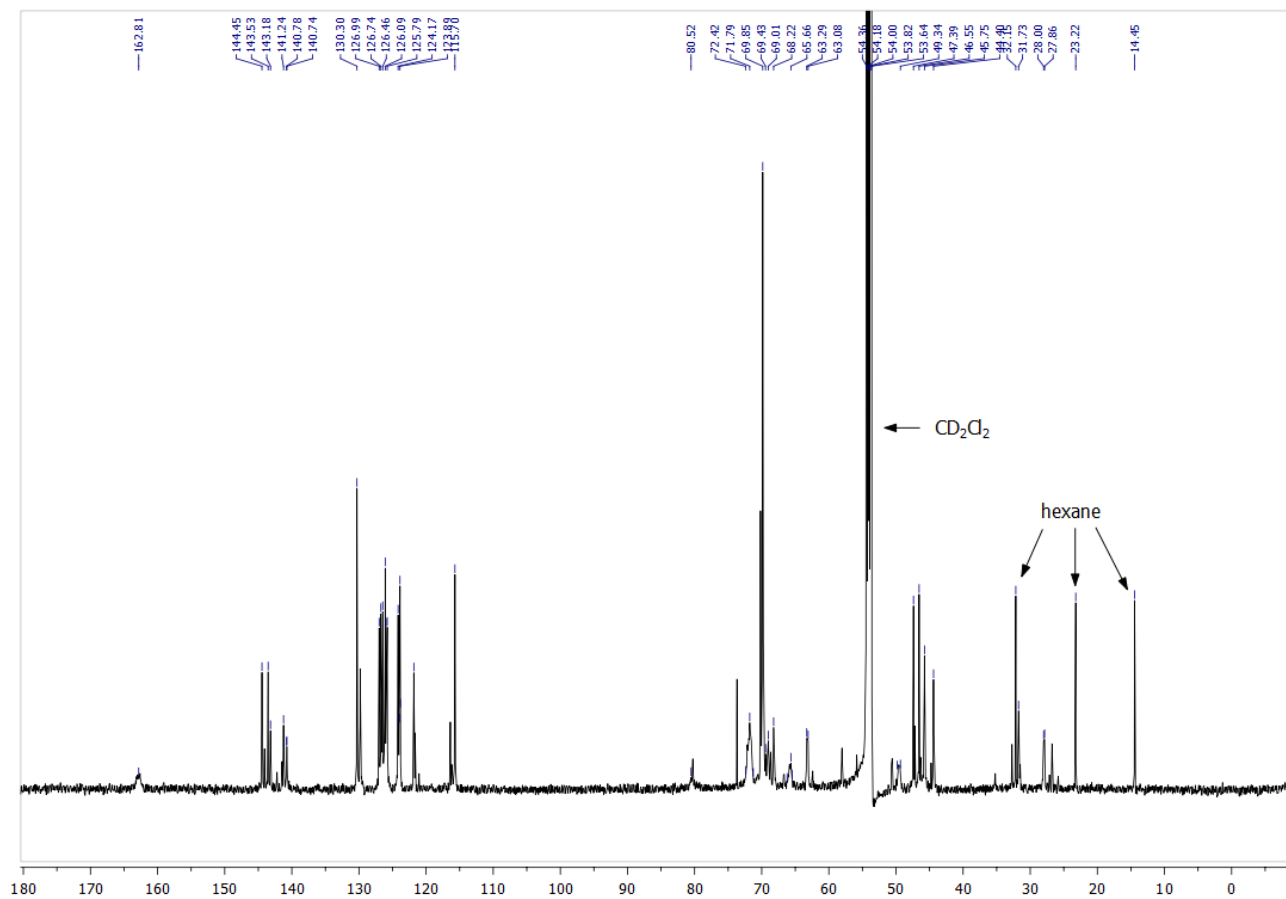

$[\text{Pd}(\text{allyl})(\text{L4})_2]\text{BF}_4$ ,  $^{13}\text{C}\{^1\text{H}\}$  (150.9 MHz,  $\text{CDCl}_3$ , 30 °C).



# NMR AND MASS SPECTRA

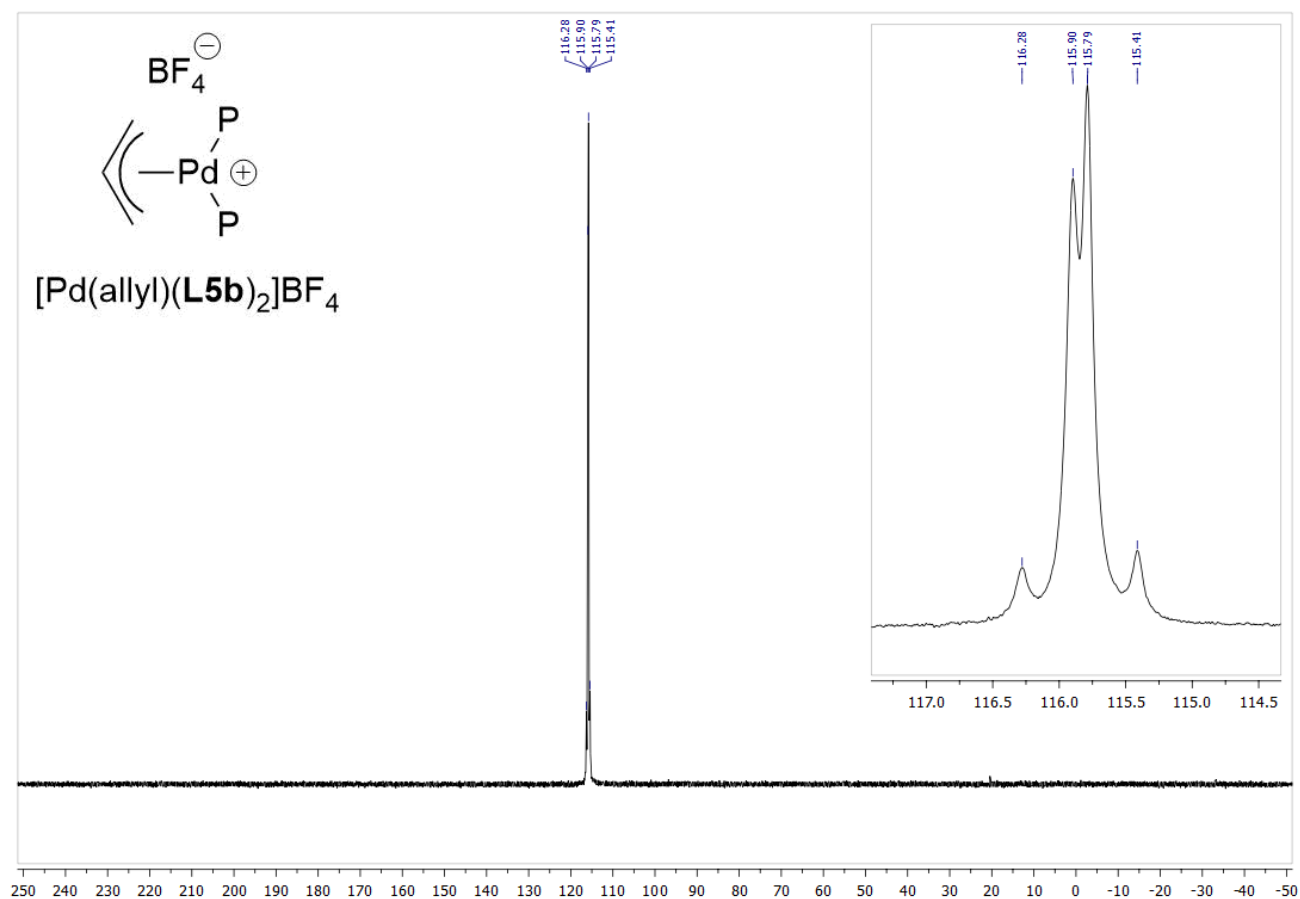

[Pd(allyl)(L5b)<sub>2</sub>]BF<sub>4</sub>, <sup>31</sup>P{<sup>1</sup>H} (242.9 MHz, CDCl<sub>3</sub>, 30 °C).

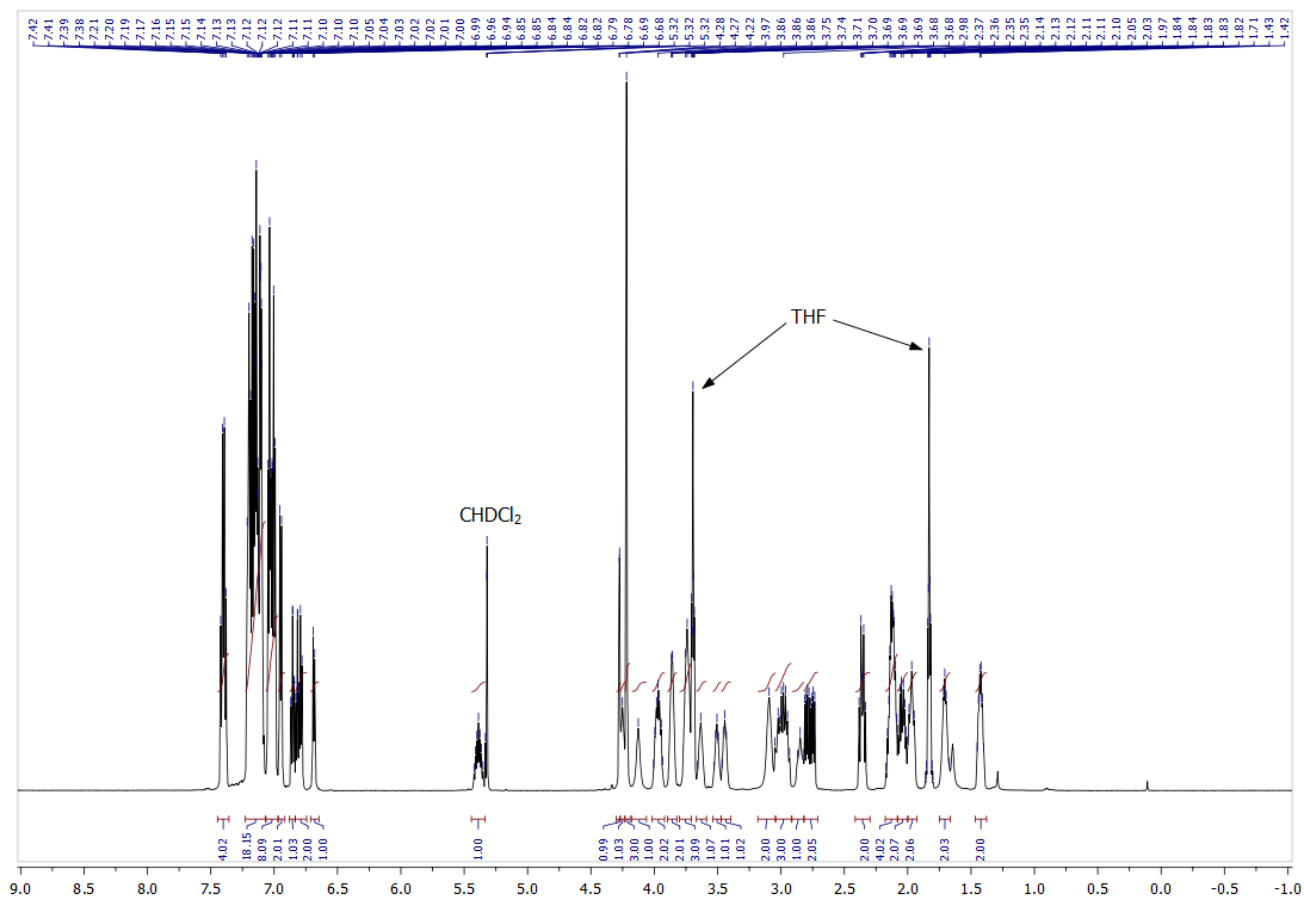

[Pd(allyl)(L5b)<sub>2</sub>]BF<sub>4</sub>, <sup>1</sup>H (600.1 MHz, CDCl<sub>3</sub>, 30 °C).

# NMR AND MASS SPECTRA

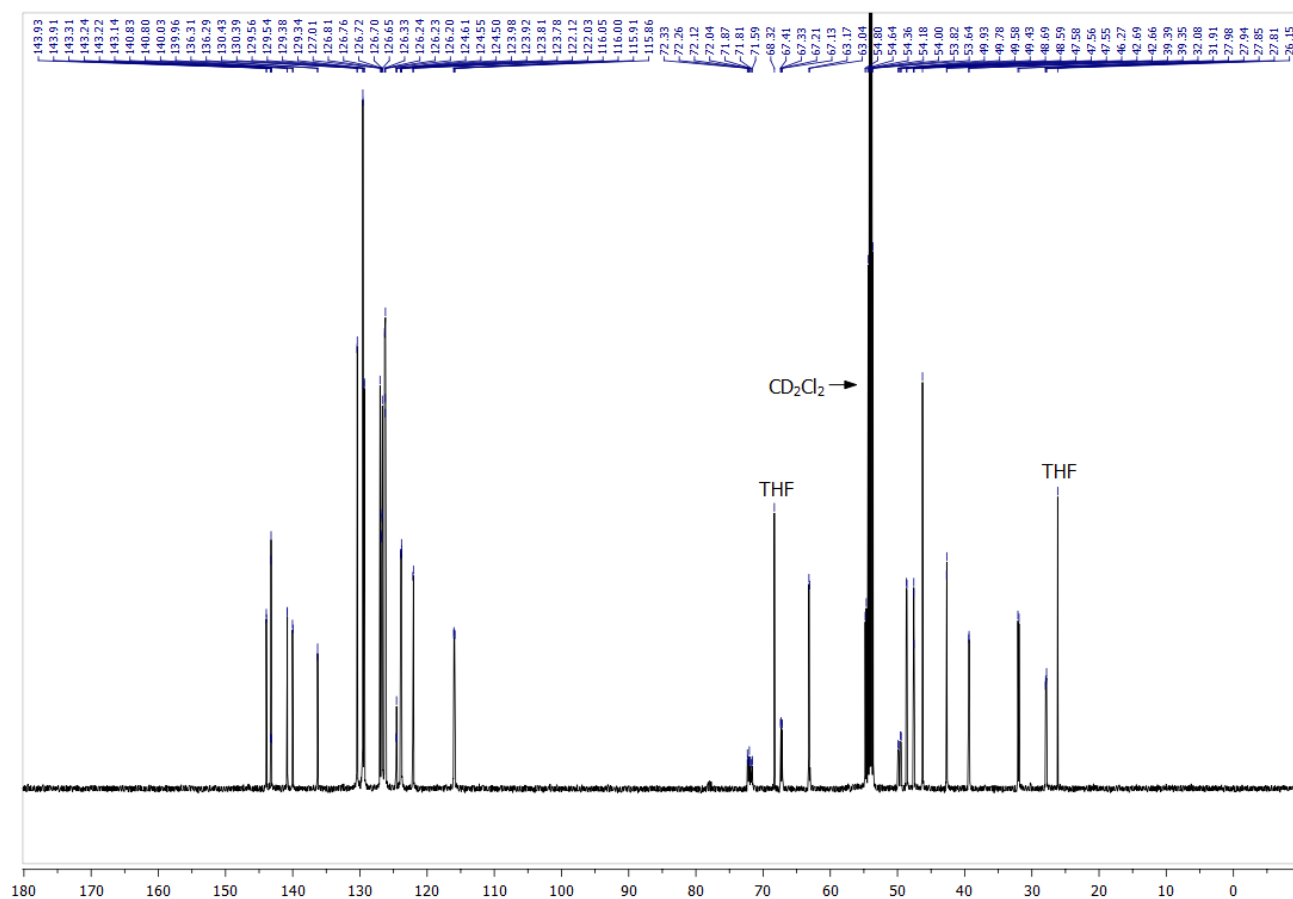

[Pd(allyl)(L5b)<sub>2</sub>]BF<sub>4</sub>, <sup>13</sup>C{<sup>1</sup>H} (150.9 MHz, CDCl<sub>3</sub>, 30 °C).

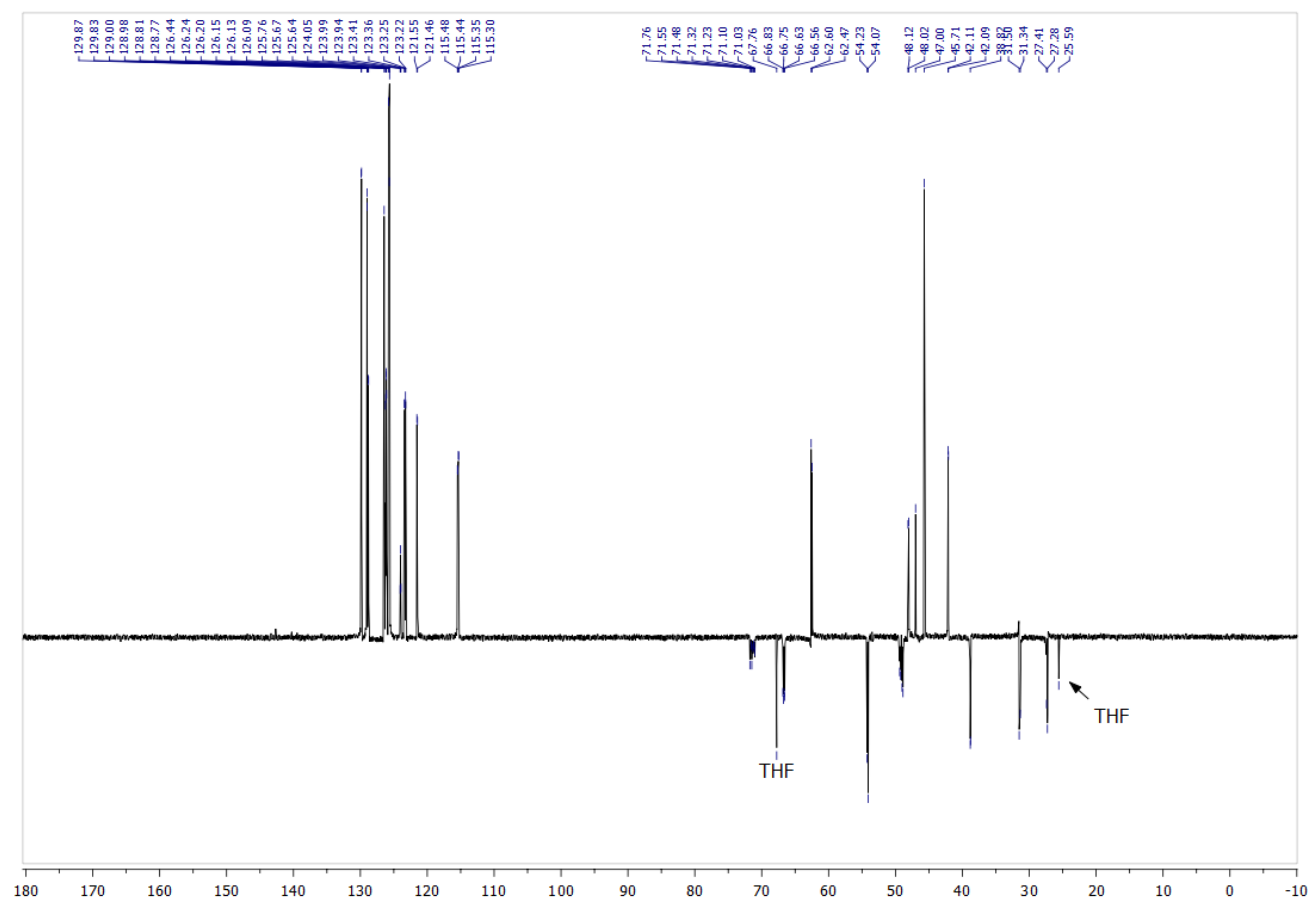

[Pd(allyl)(L5b)<sub>2</sub>]BF<sub>4</sub>, <sup>13</sup>C{<sup>1</sup>H} DEPT (150.9 MHz, CDCl<sub>3</sub>, 30 °C).

# NMR AND MASS SPECTRA

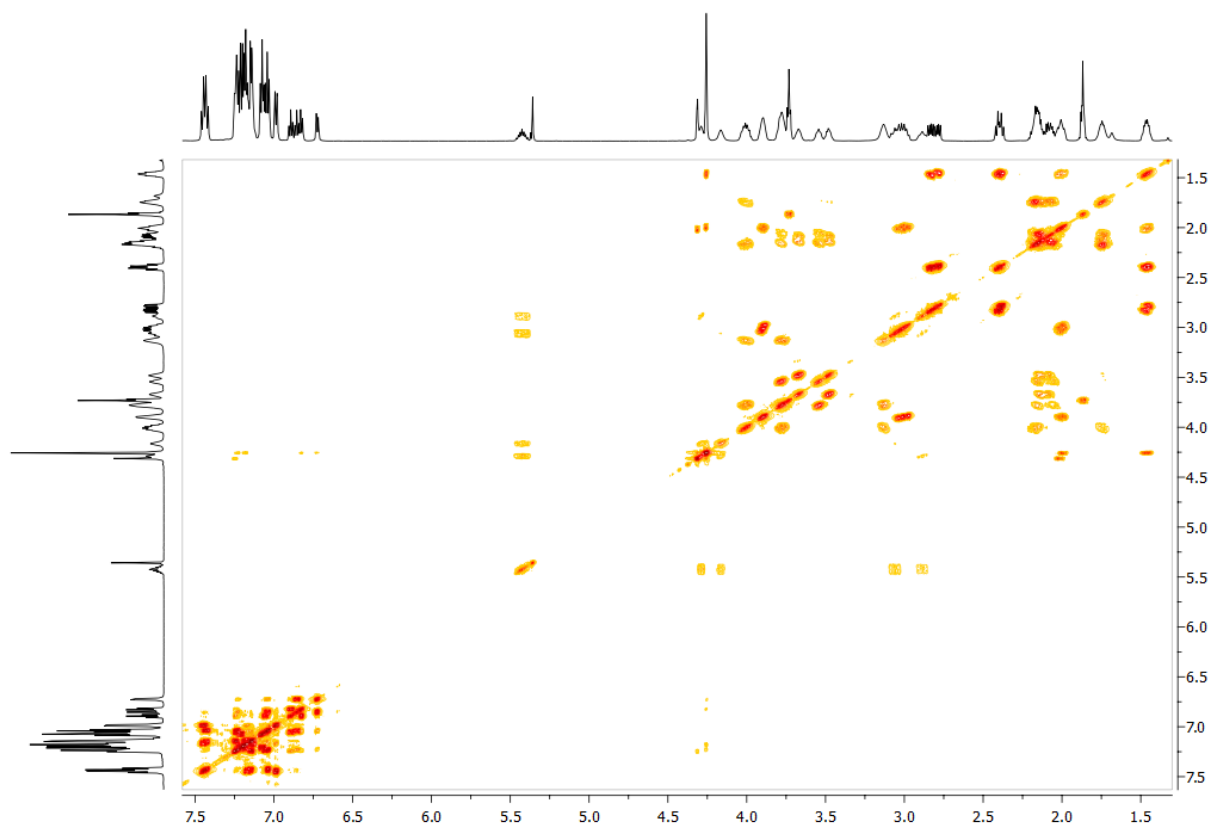

[Pd(allyl)(L5b)<sub>2</sub>]BF<sub>4</sub>, <sup>1</sup>H-<sup>1</sup>H COSY.

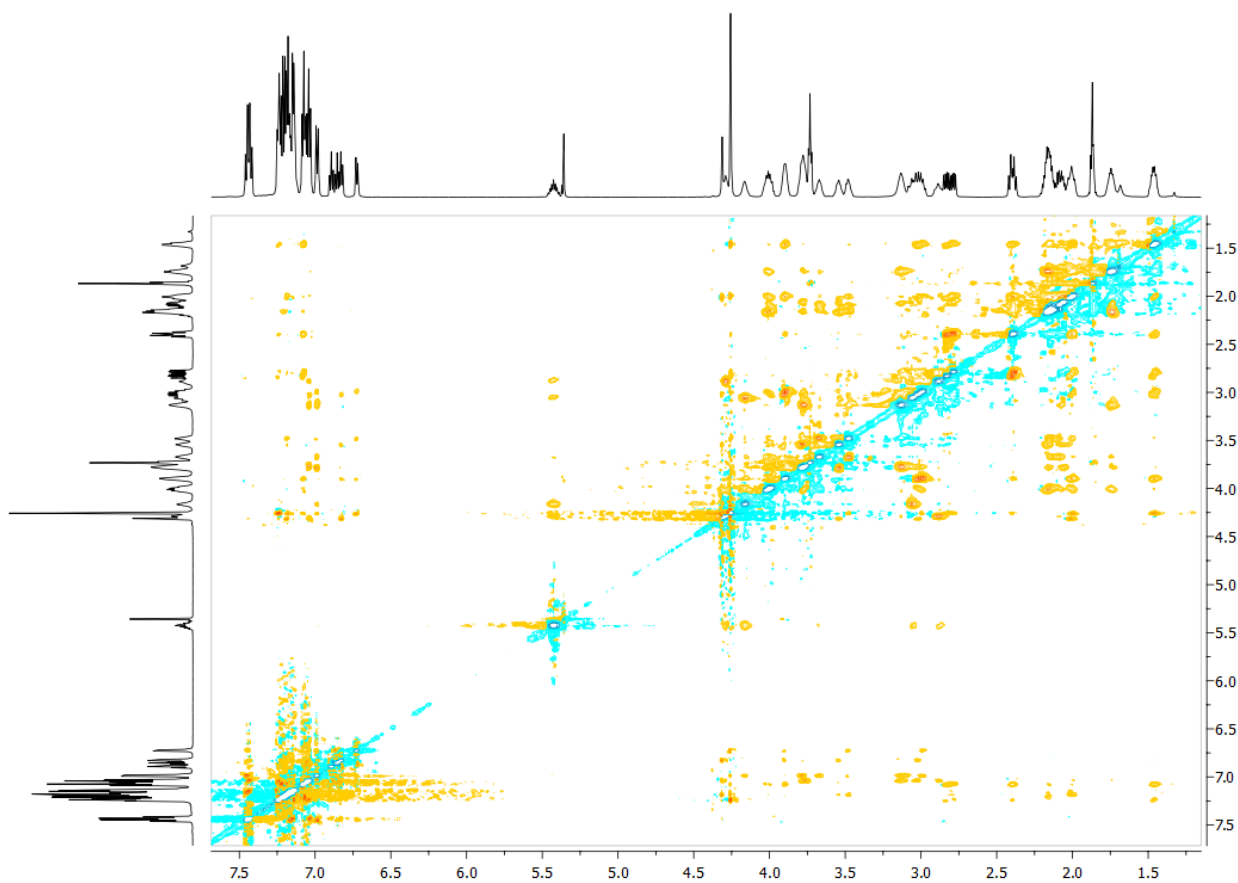

[Pd(allyl)(L5b)<sub>2</sub>]BF<sub>4</sub>, <sup>1</sup>H-<sup>1</sup>H NOESY.

# NMR AND MASS SPECTRA

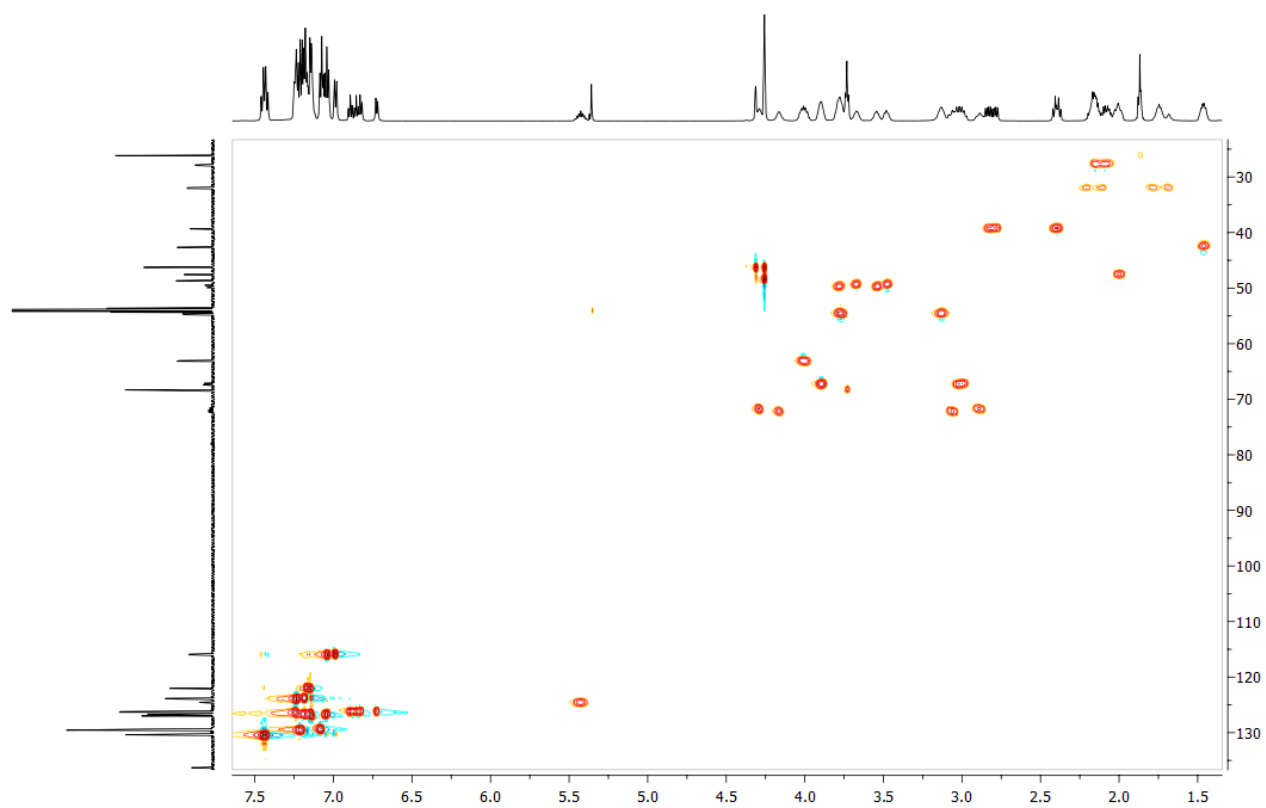

[Pd(allyl)(L5b)<sub>2</sub>]BF<sub>4</sub>, <sup>1</sup>H-<sup>13</sup>C HSQC.

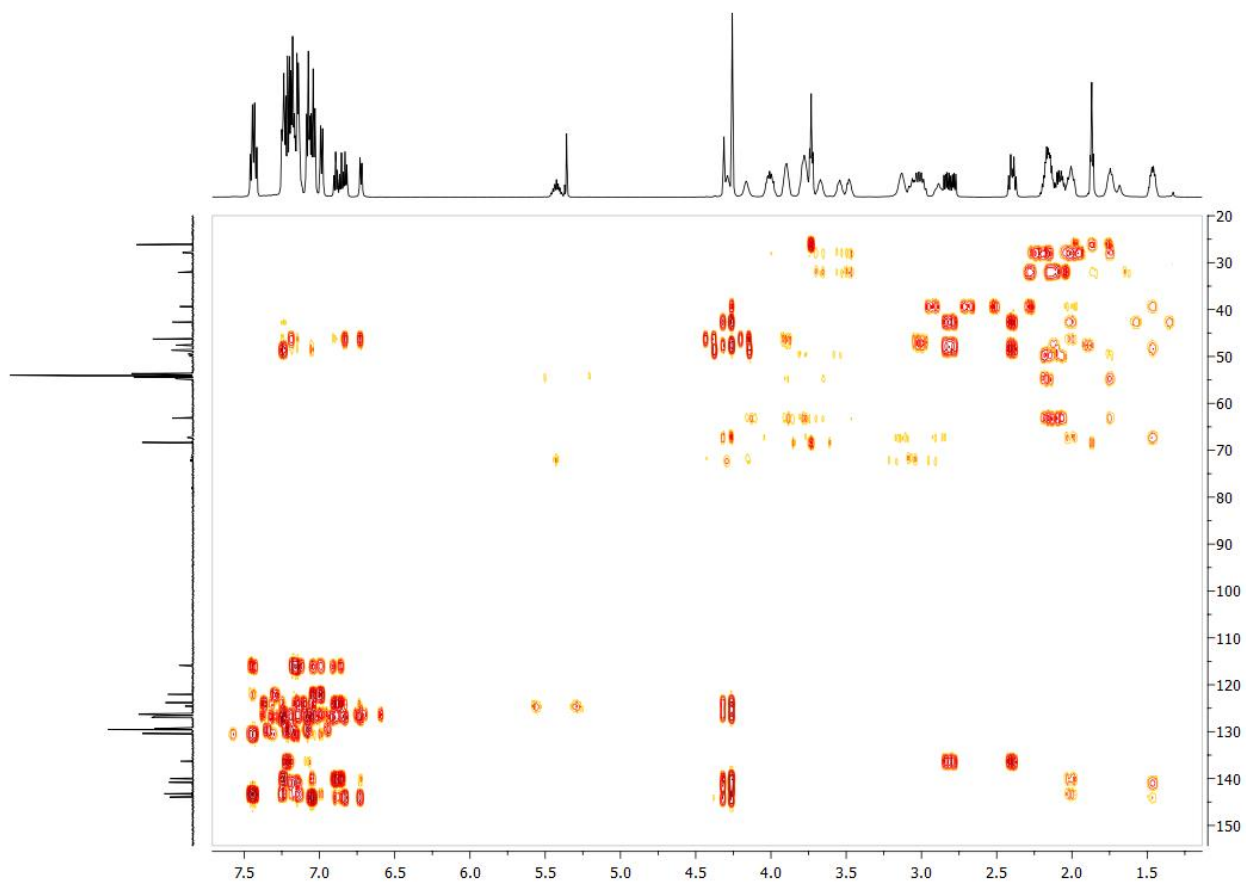

[Pd(allyl)(L5b)<sub>2</sub>]BF<sub>4</sub>, <sup>1</sup>H-<sup>13</sup>C HMBC.

# NMR AND MASS SPECTRA

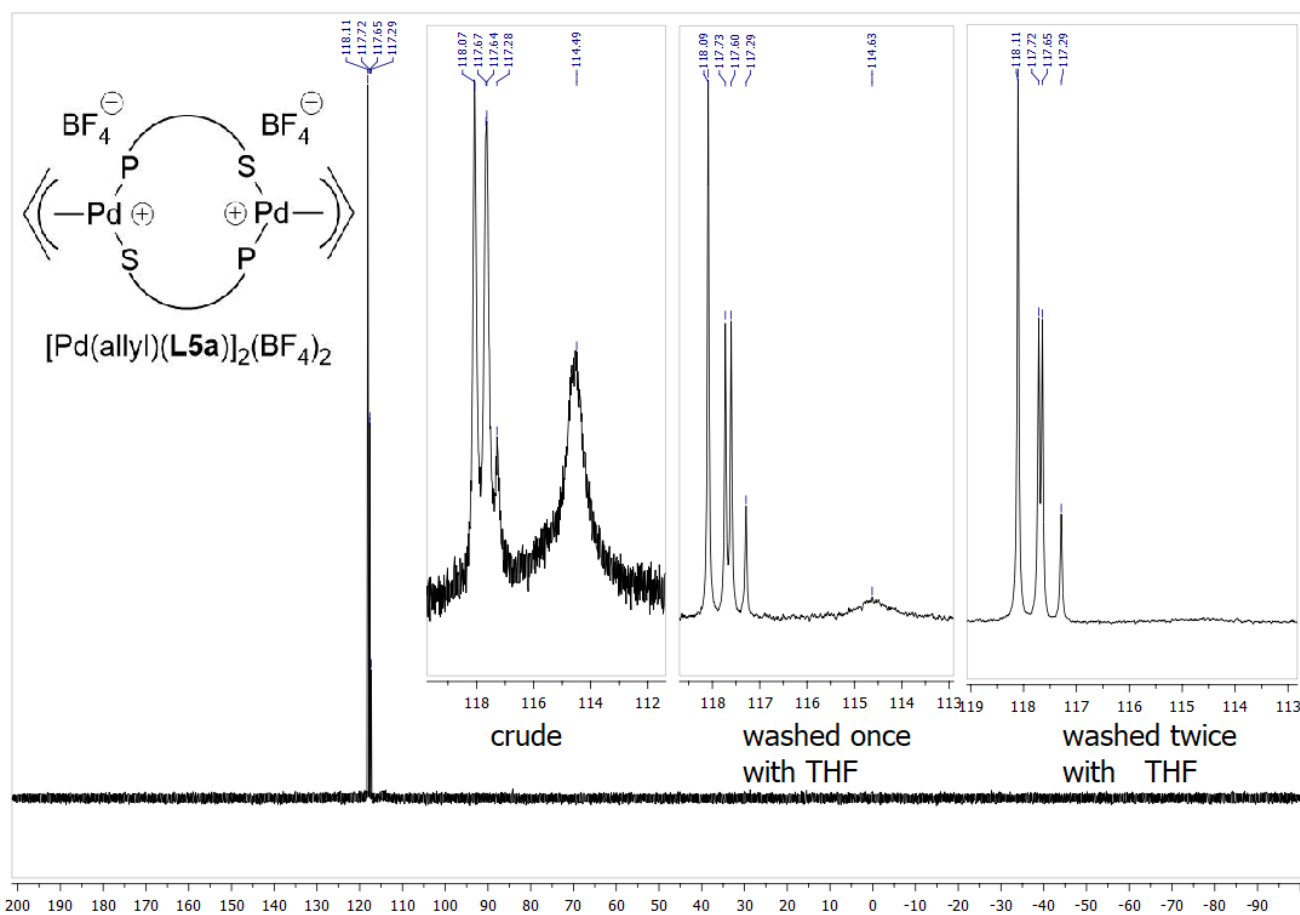

$[\text{Pd}(\text{allyl})(\text{L5a})_2](\text{BF}_4)_2$ ,  $^{31}\text{P}\{^1\text{H}\}$  (242.9 MHz, CDCl<sub>3</sub>, 30 °C).

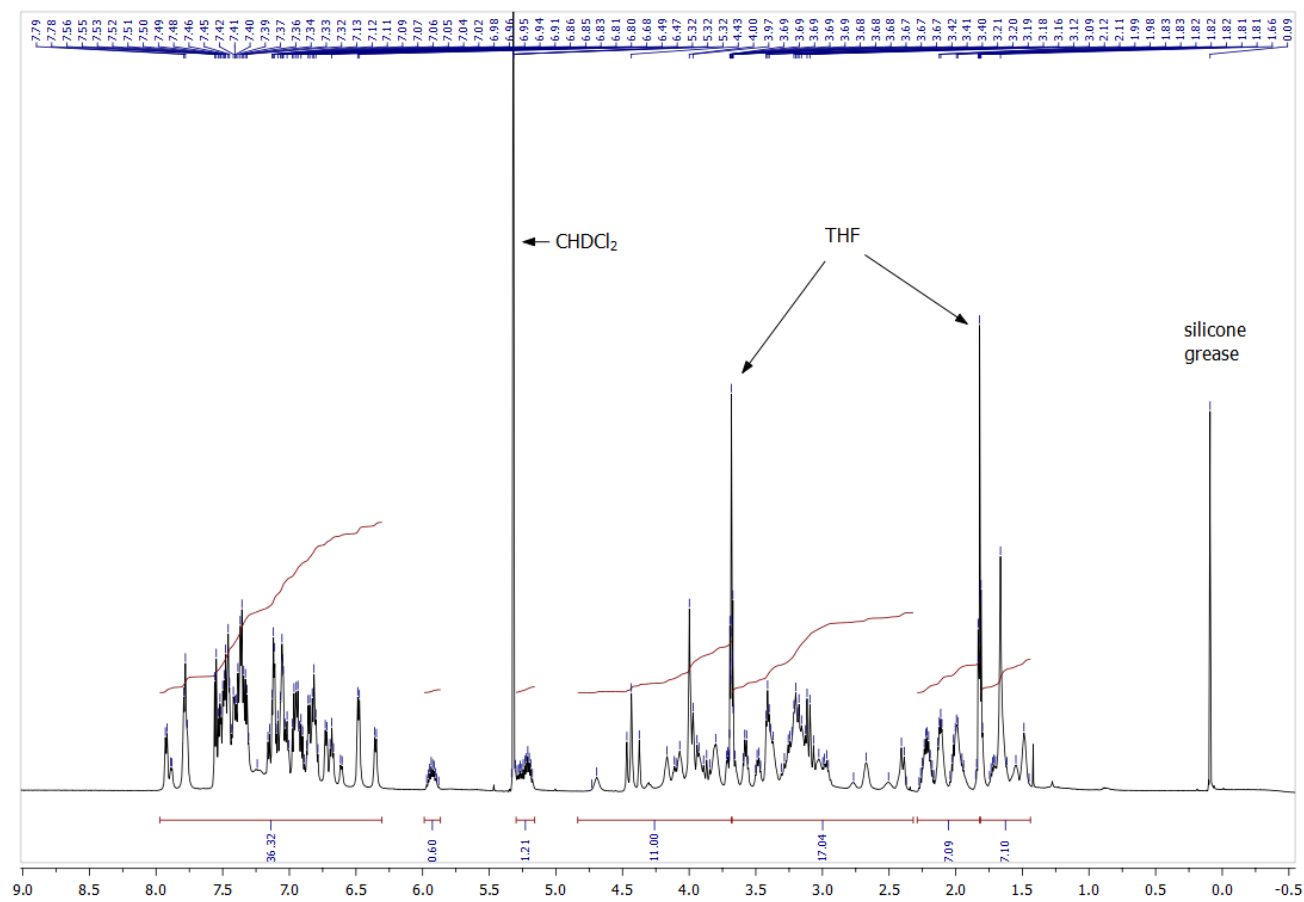

$[\text{Pd}(\text{allyl})(\text{L5a})_2](\text{BF}_4)_2$ ,  $^1\text{H}$  (600.1 MHz, CDCl<sub>3</sub>, 30 °C).

# NMR AND MASS SPECTRA

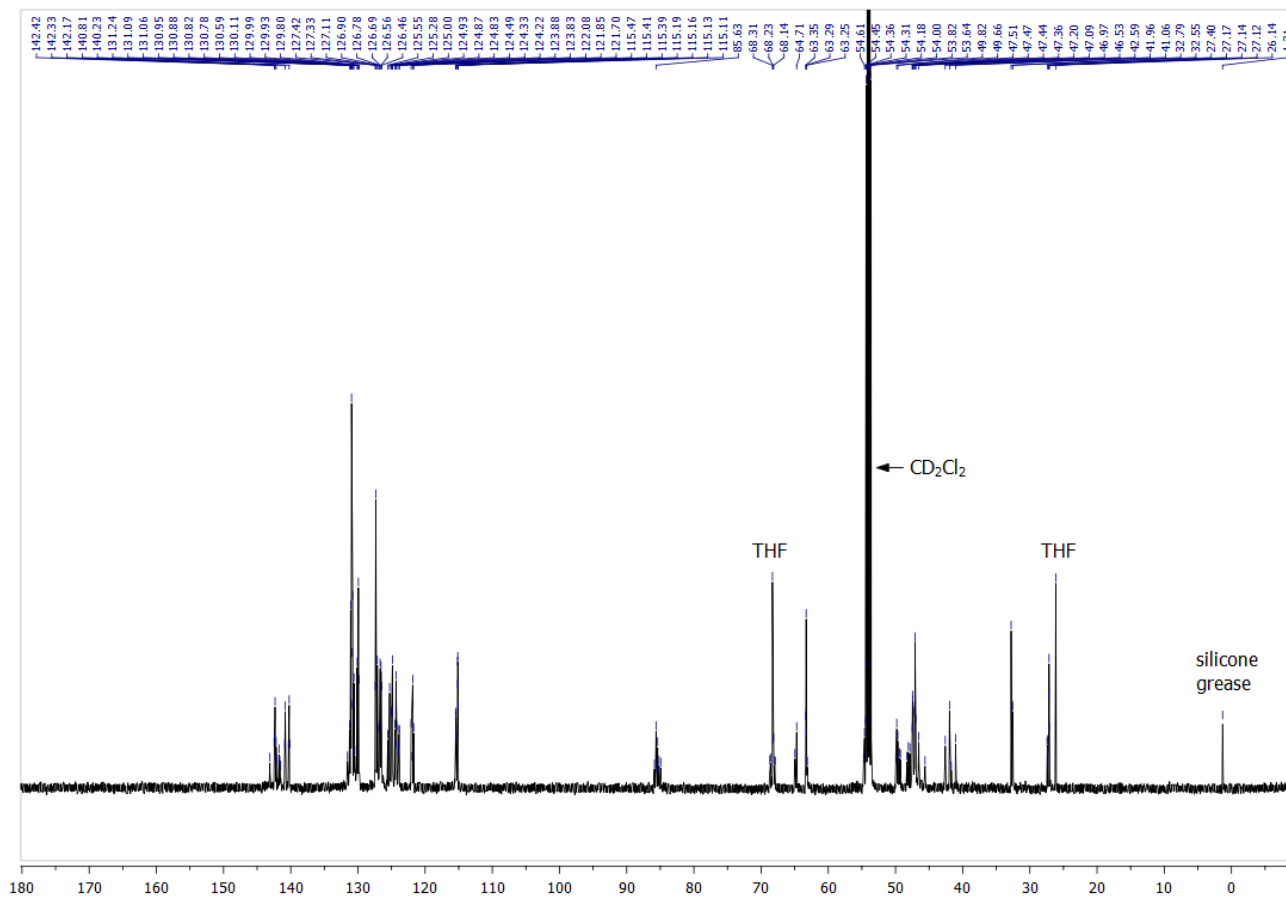

$[Pd(allyl)(L5a)]_2(BF_4)_2$ ,  $^{13}C\{^1H\}$  (150.9 MHz,  $CDCl_3$ , 30 °C).

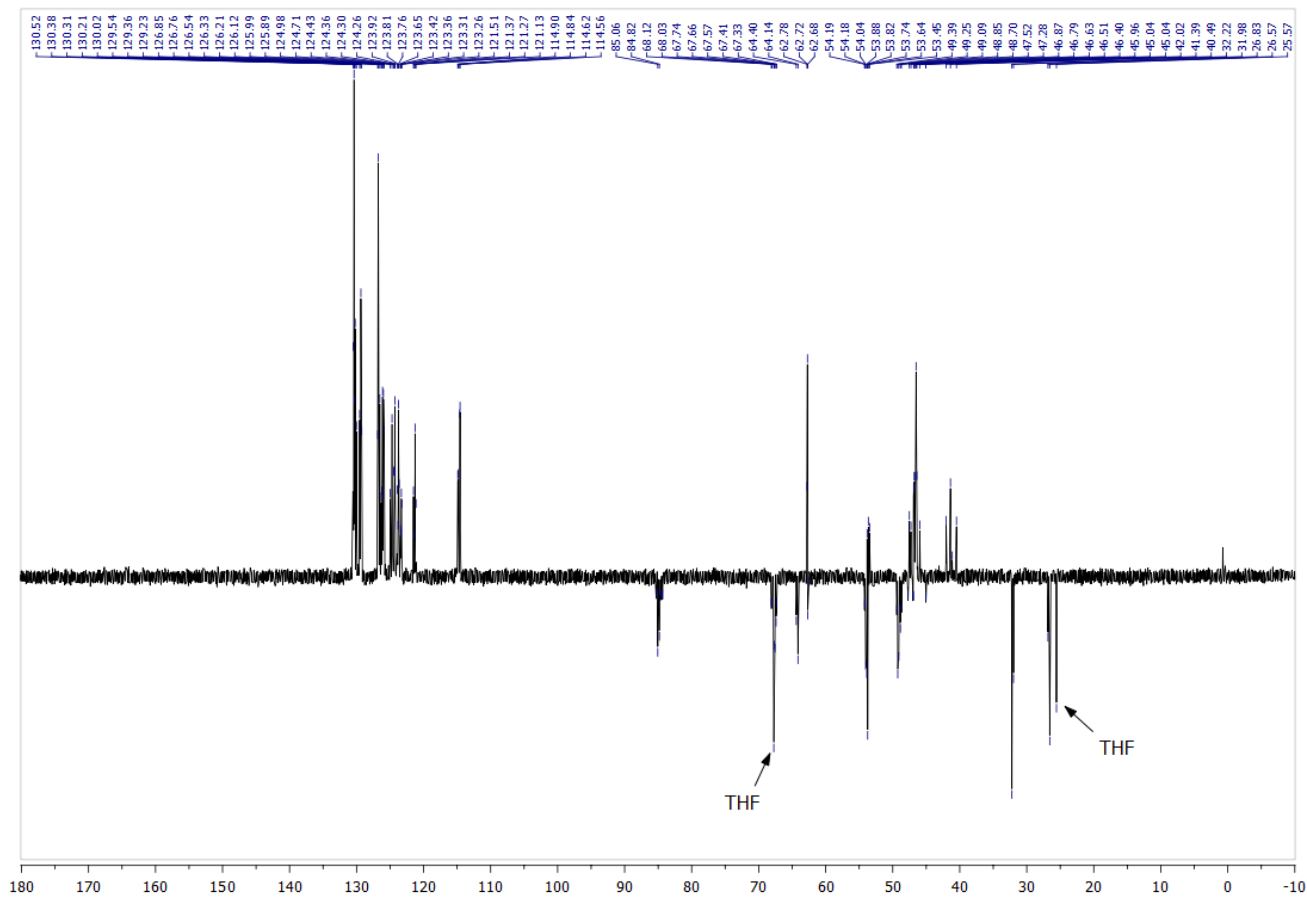

$[Pd(allyl)(L5a)]_2(BF_4)_2$ ,  $^{13}C\{^1H\}$  DEPT (150.9 MHz,  $CDCl_3$ , 30 °C).

## NMR AND MASS SPECTRA

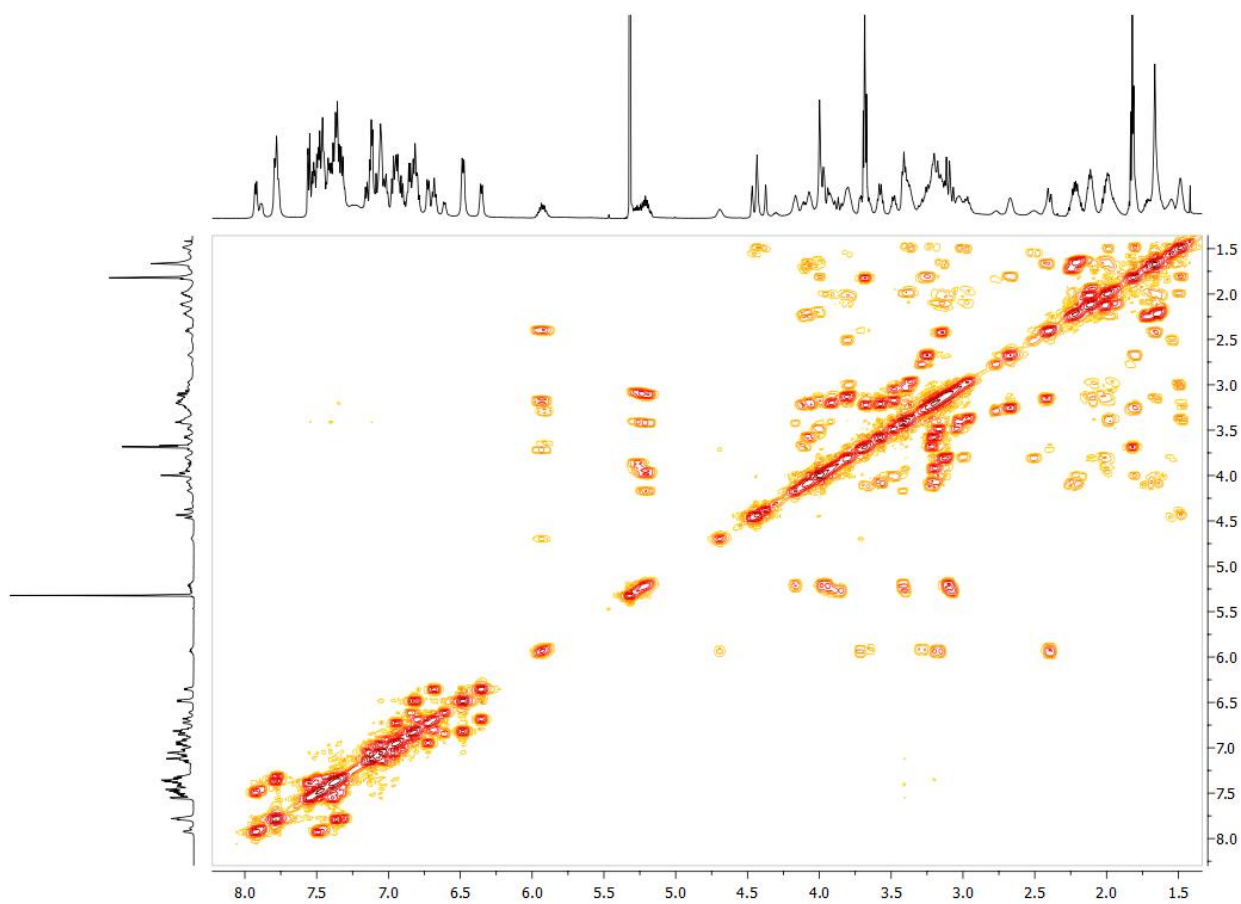

$[\text{Pd}(\text{allyl})(\text{L5a})]_2(\text{BF}_4)_2$ ,  $^1\text{H}$ - $^1\text{H}$  COSY.

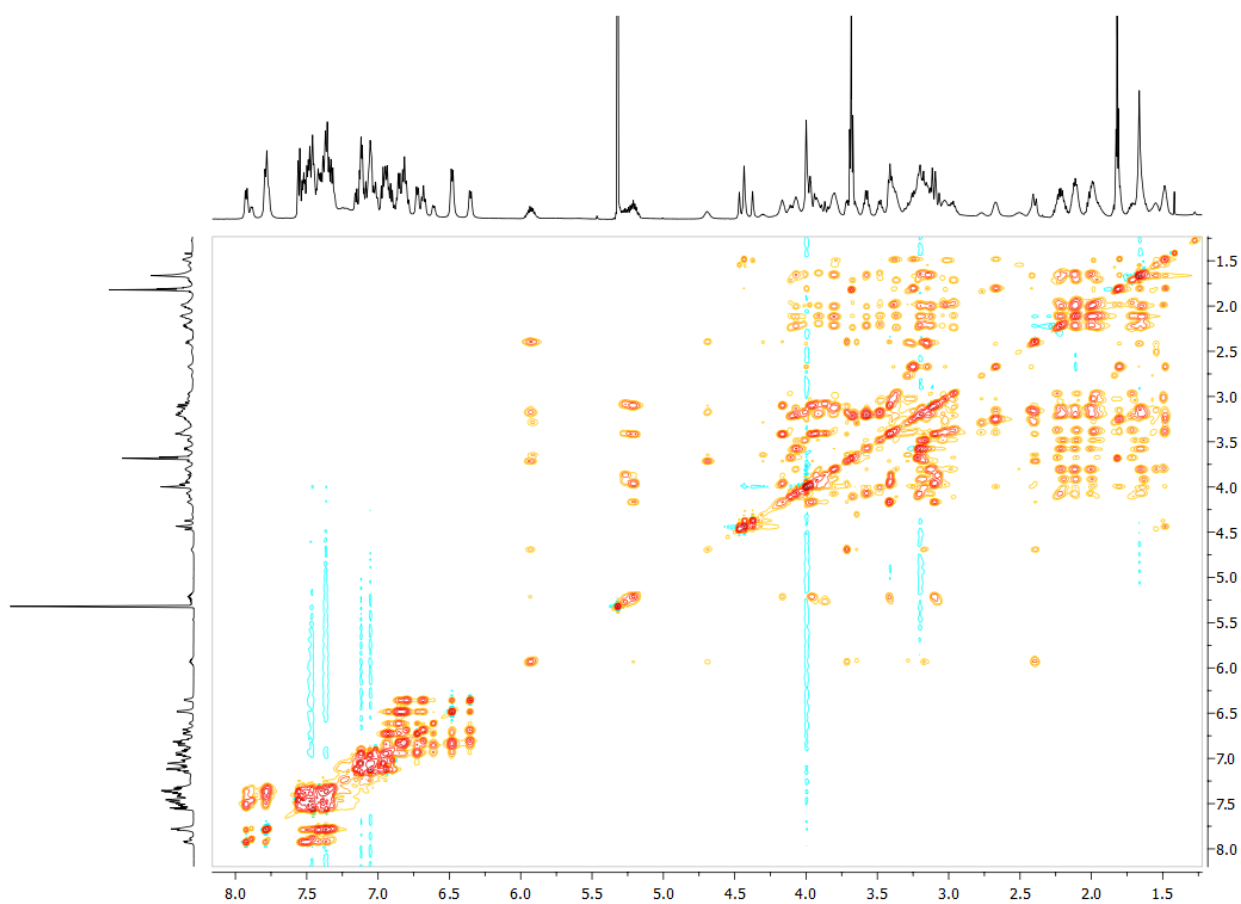

$[\text{Pd}(\text{allyl})(\text{L5a})]_2(\text{BF}_4)_2$ ,  $^1\text{H}$ - $^1\text{H}$  TOCSY.

## NMR AND MASS SPECTRA

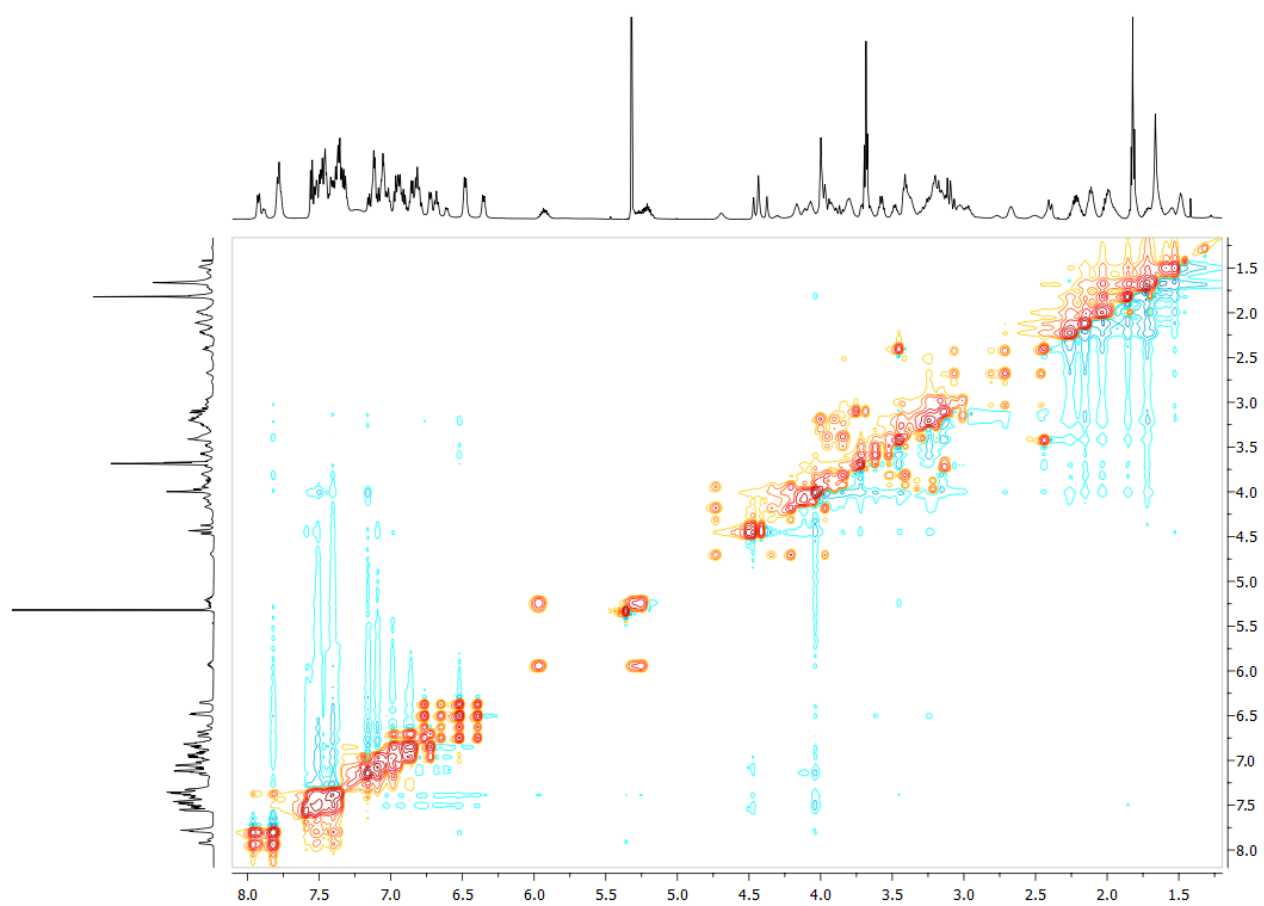

$[\text{Pd}(\text{allyl})(\text{L5a})]_2(\text{BF}_4)_2$ ,  $^1\text{H}$ - $^1\text{H}$  NOESY.

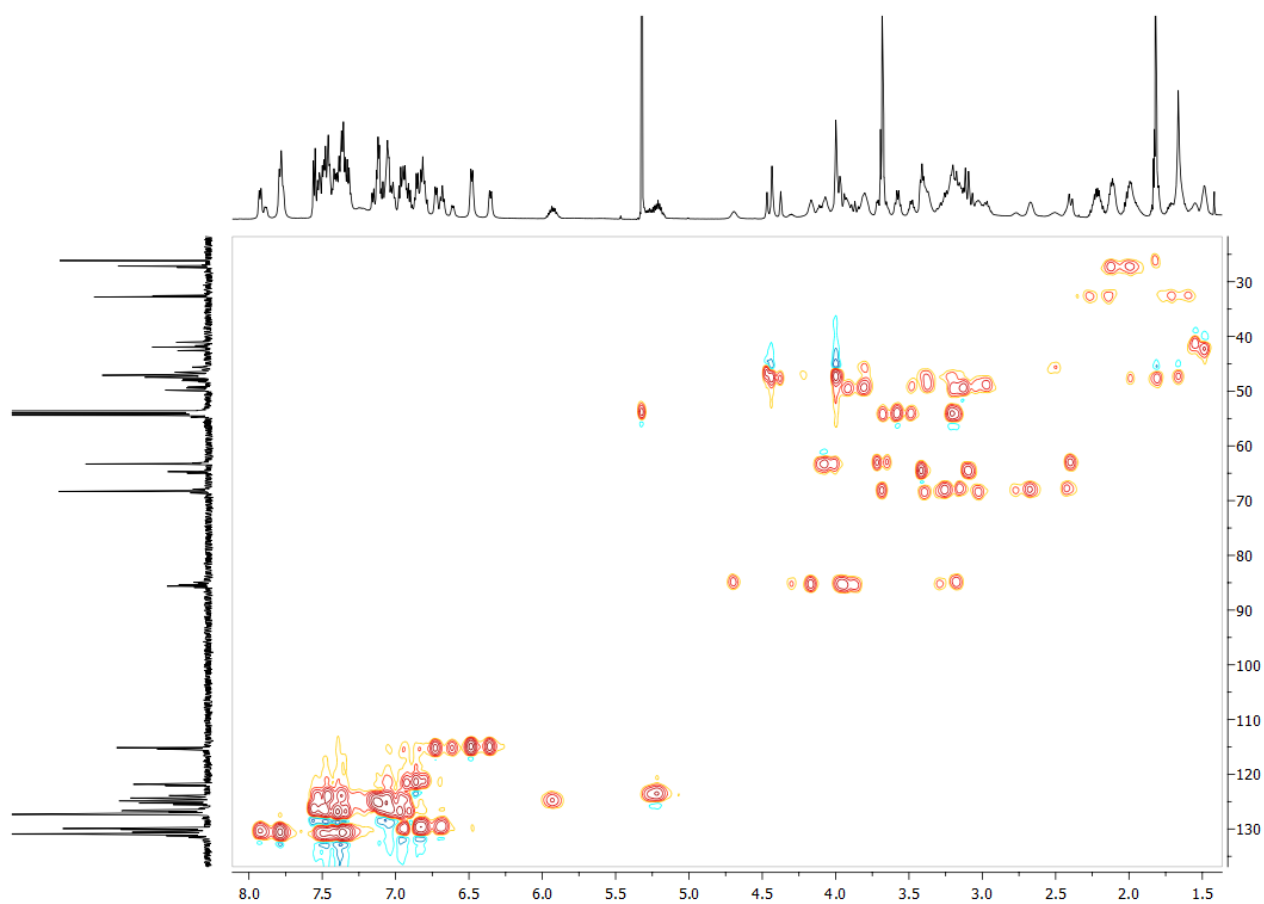

$[\text{Pd}(\text{allyl})(\text{L5a})]_2(\text{BF}_4)_2$ ,  $^1\text{H}$ - $^{13}\text{C}$  HSQC.



# NMR AND MASS SPECTRA

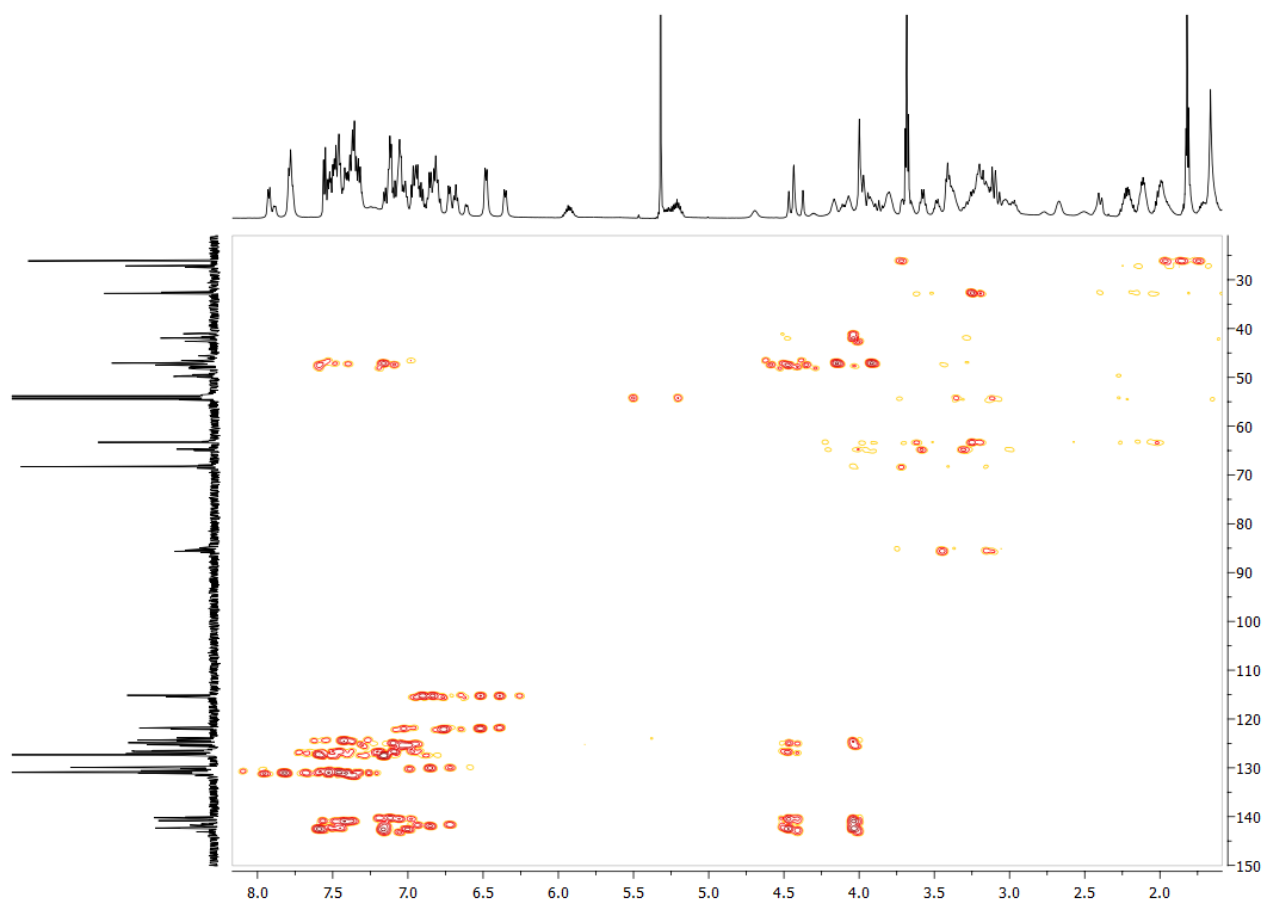

$[\text{Pd}(\text{allyl})(\text{L5a})]_2(\text{BF}_4)_2$ ,  $^1\text{H}$ - $^{13}\text{C}$  HMBC.

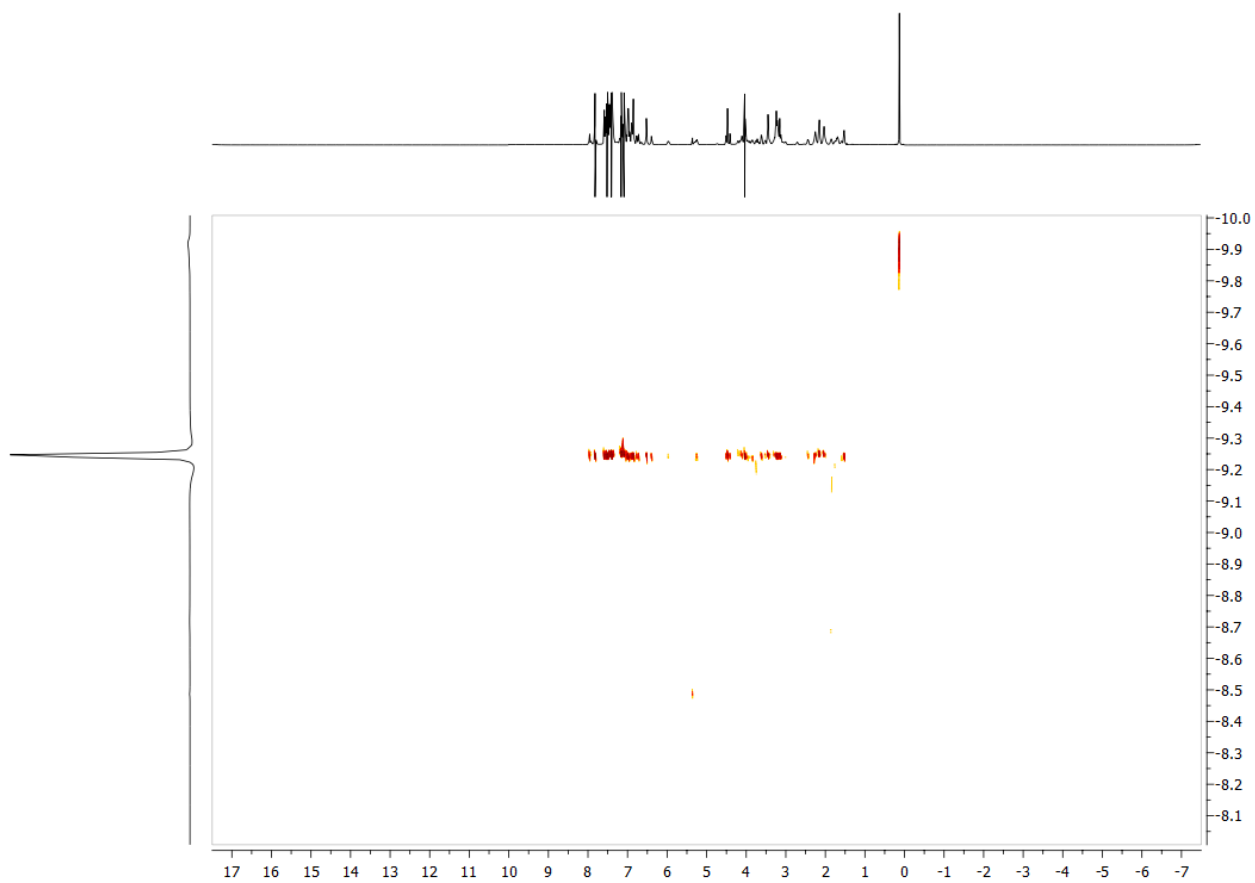

$[\text{Pd}(\text{allyl})(\text{L5a})]_2(\text{BF}_4)_2$ , DOSY.

## NMR AND MASS SPECTRA

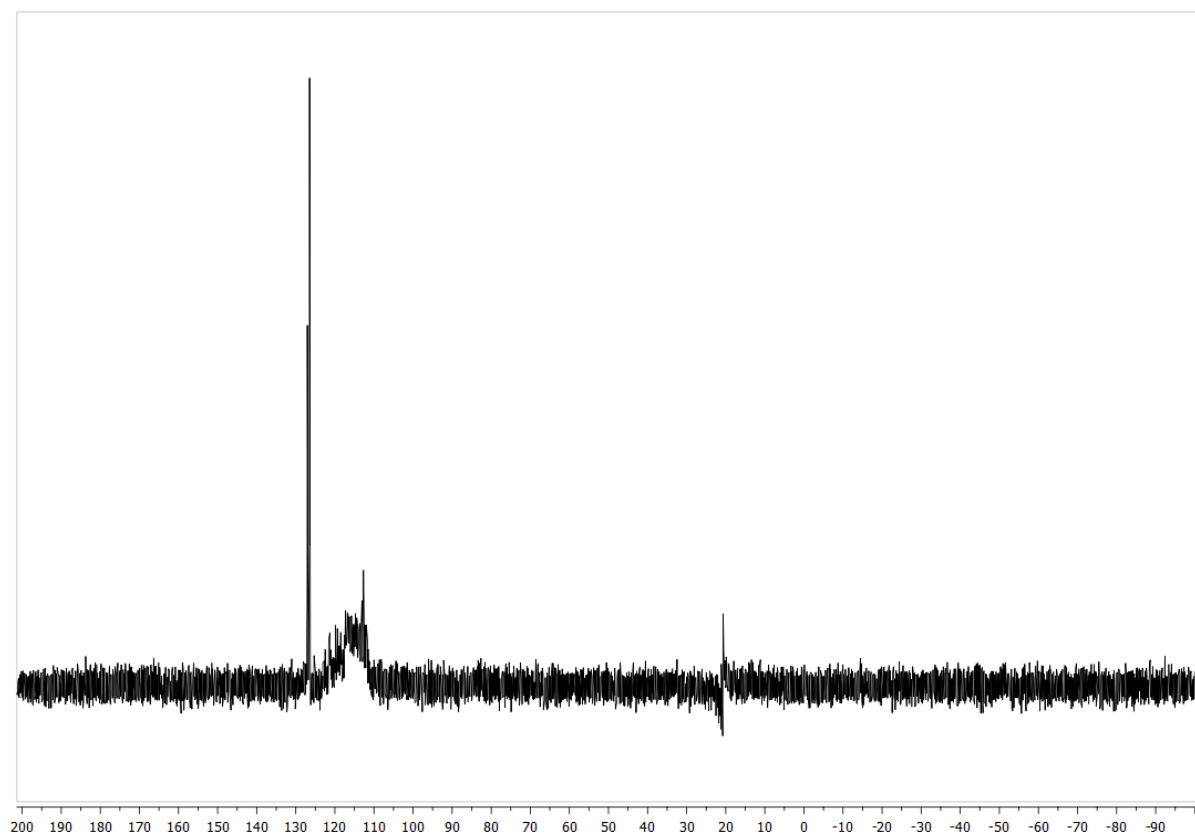

Products of the complexation of **L4** with  $[\text{Pd}(\text{allyl})\text{Cl}]_2$  in the presence of  $\text{AgBF}_4$  (the molar ratio of L/Pd = 1)  
 $^{31}\text{P}\{^1\text{H}\}$  (242.9 MHz,  $\text{CDCl}_3$ , 30 °C).

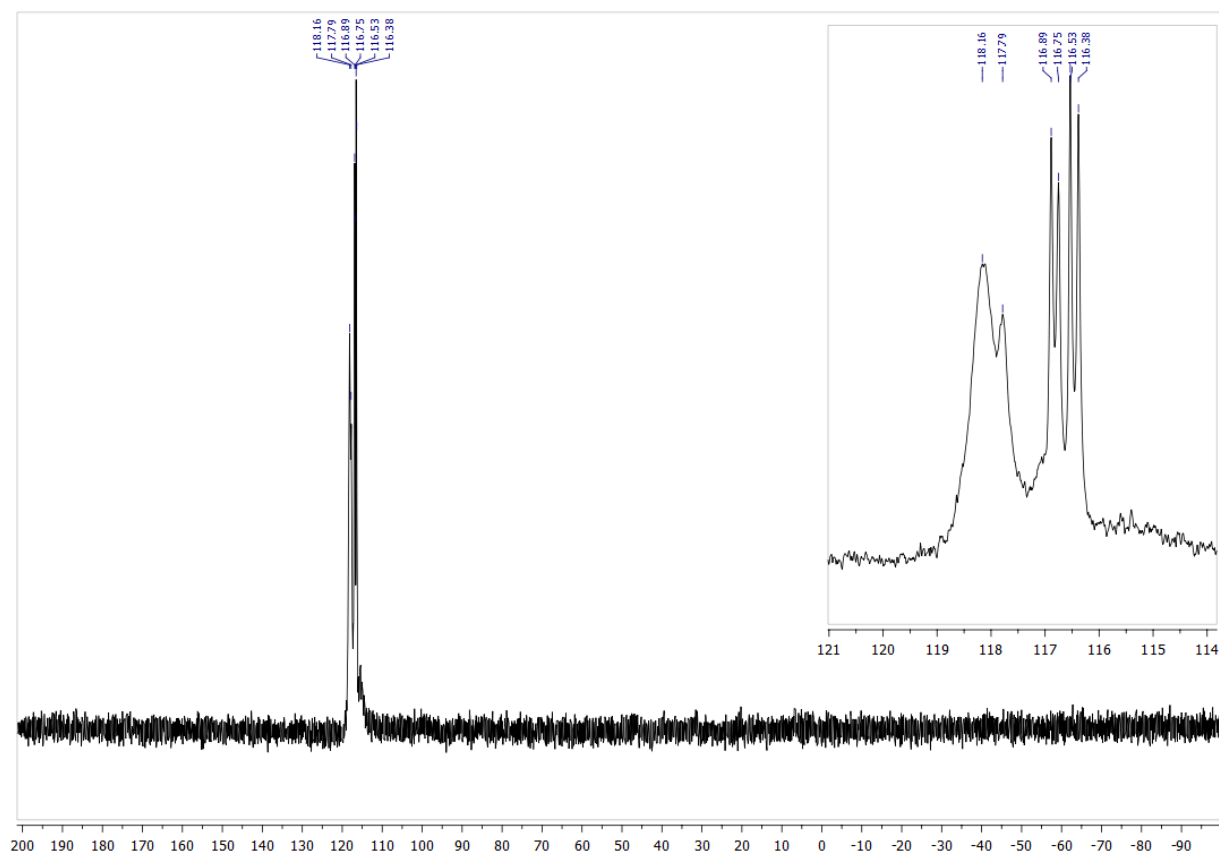

Products of the complexation of **L5b** with  $[\text{Pd}(\text{allyl})\text{Cl}]_2$  in the presence of  $\text{AgBF}_4$  (the molar ratio of L/Pd = 1)  
 $^{31}\text{P}\{^1\text{H}\}$  (242.9 MHz,  $\text{CDCl}_3$ , 30 °C).

## NMR AND MASS SPECTRA

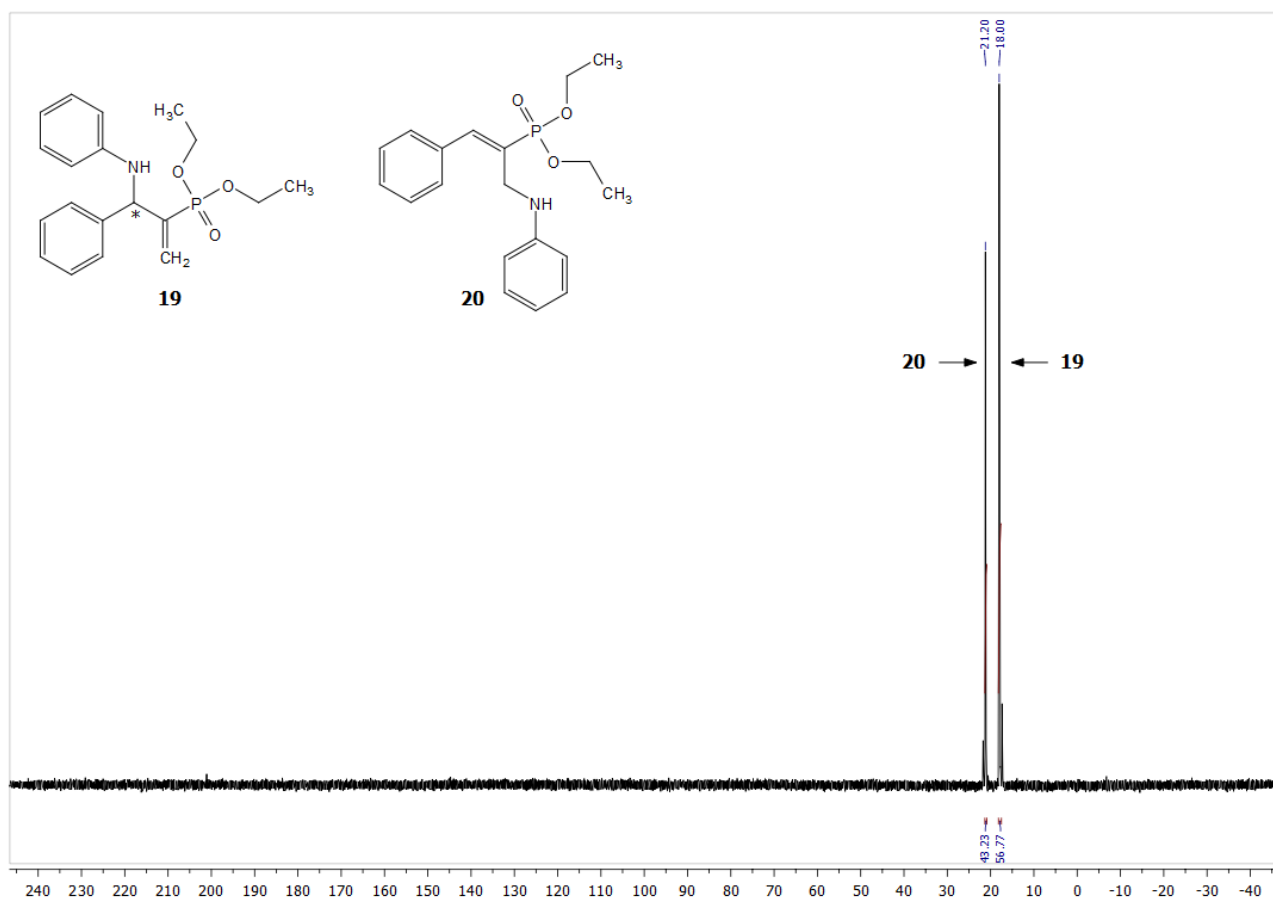

Pd-catalyzed allylic amination of **18** with aniline (entry 7 in Table 6).  $^{31}\text{P}\{^1\text{H}\}$  (202.3 MHz,  $\text{CHCl}_3$ , ambient temp.).

## Display Report

**Analysis Info**

Analysis Name D:\Data\Kolotyrkina\2020\Kostenko\0318025.d  
 Method tune\_50-1600.m  
 Sample Name /ZSGN RSU1  
 Comment C43H49N4O2P2Pd mH 822.2453 calibrant added CH3CN

Acquisition Date 18.03.2020 16:00:39  
 Operator BDAL@DE  
 Instrument / Ser# micrOTOF 10248

**Acquisition Parameter**

|             |            |                      |          |                  |           |
|-------------|------------|----------------------|----------|------------------|-----------|
| Source Type | ESI        | Ion Polarity         | Positive | Set Nebulizer    | 1.0 Bar   |
| Focus       | Not active |                      |          | Set Dry Heater   | 200 °C    |
| Scan Begin  | 50 m/z     | Set Capillary        | 4500 V   | Set Dry Gas      | 4.0 l/min |
| Scan End    | 1600 m/z   | Set End Plate Offset | -500 V   | Set Divert Valve | Waste     |

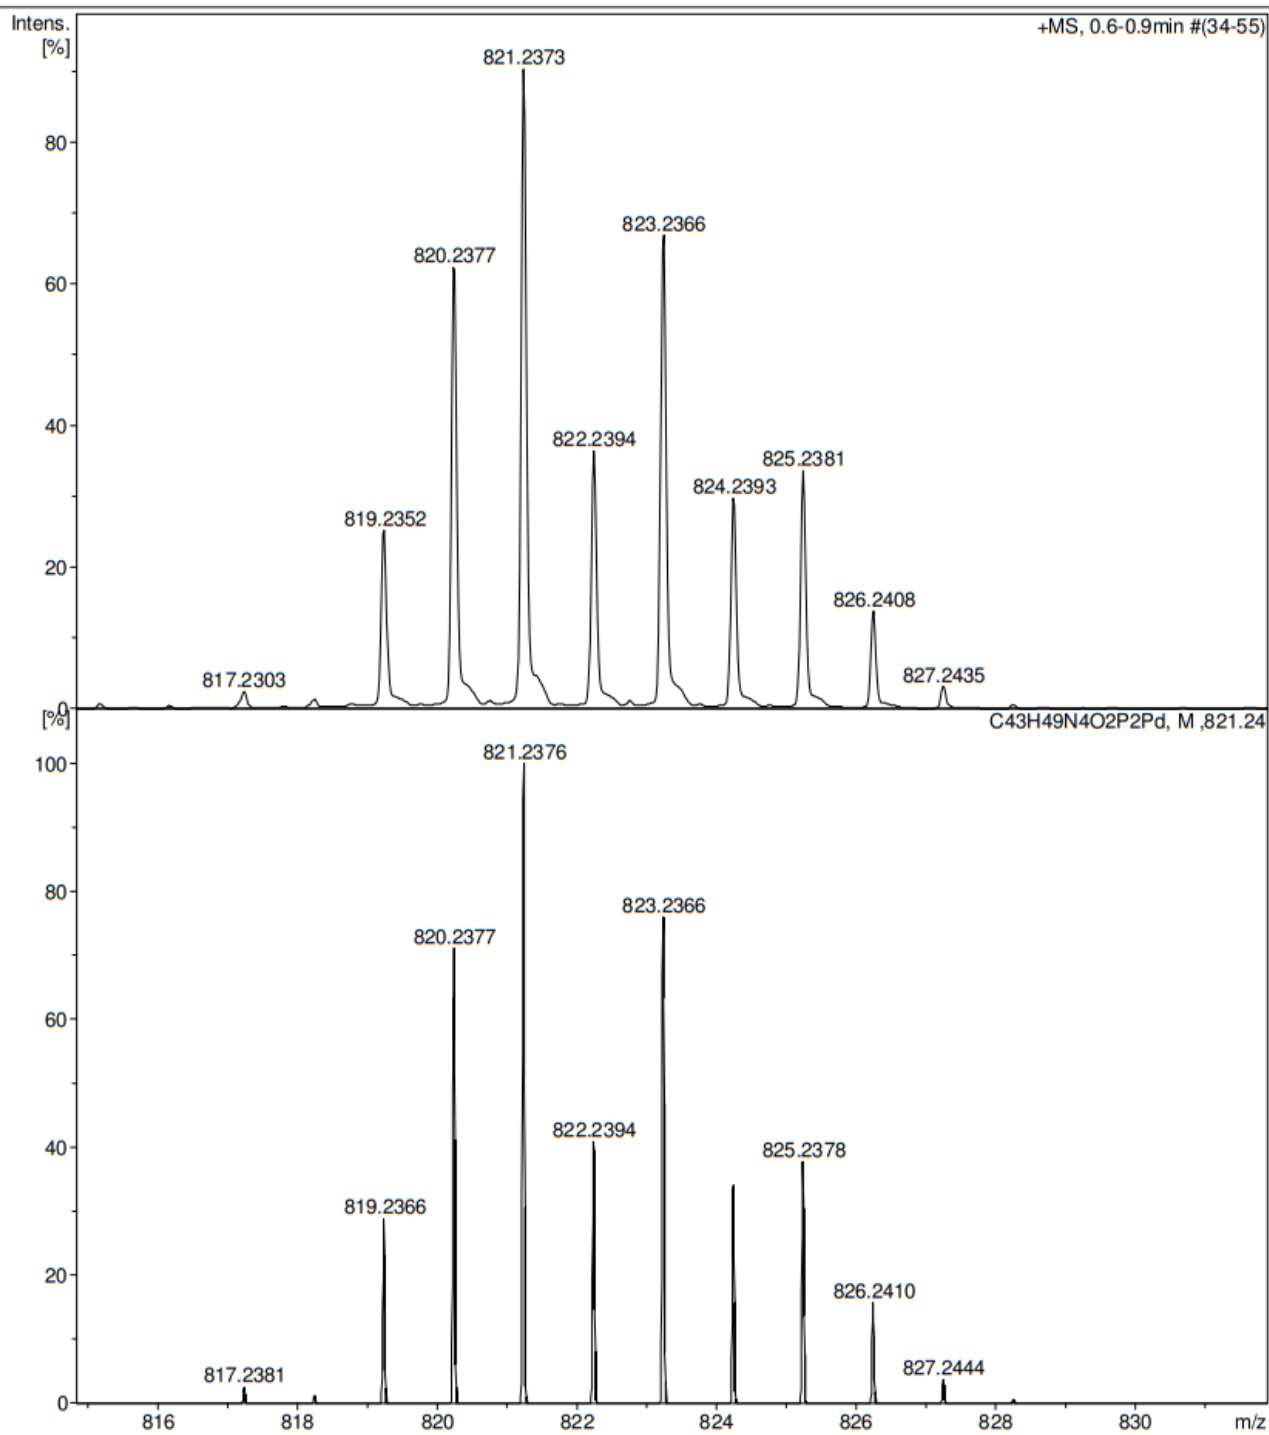

## Display Report

**Analysis Info**

Analysis Name D:\Data\Kolotyrykina\2020\Kostenko\0318027.d  
 Method tune\_50-1600.m  
 Sample Name /ZSGN RSU3  
 Comment C38H40N2OPPdS m 709.1641 calibrant added CH3CN

Acquisition Date 18.03.2020 16:17:22  
 Operator BDAL@DE  
 Instrument / Ser# micrOTOF 10248

**Acquisition Parameter**

|             |            |                      |          |                  |           |
|-------------|------------|----------------------|----------|------------------|-----------|
| Source Type | ESI        | Ion Polarity         | Positive | Set Nebulizer    | 1.0 Bar   |
| Focus       | Not active |                      |          | Set Dry Heater   | 200 °C    |
| Scan Begin  | 50 m/z     | Set Capillary        | 4500 V   | Set Dry Gas      | 4.0 l/min |
| Scan End    | 1600 m/z   | Set End Plate Offset | -500 V   | Set Divert Valve | Waste     |

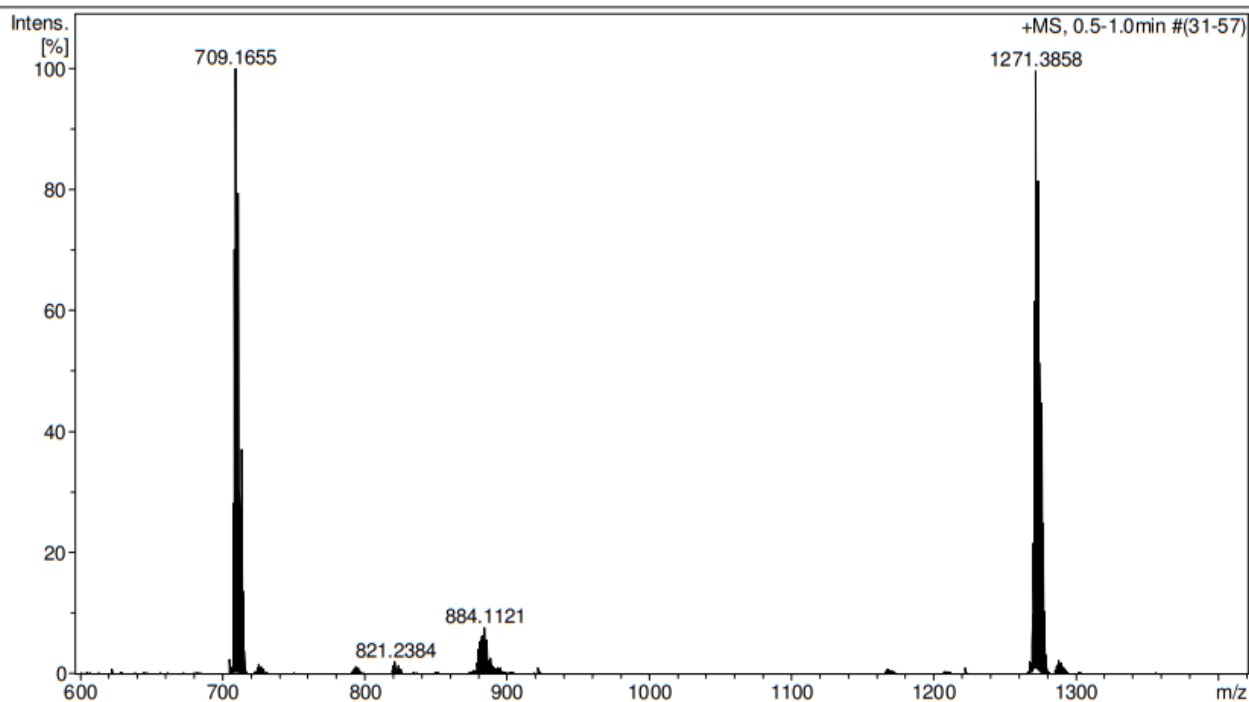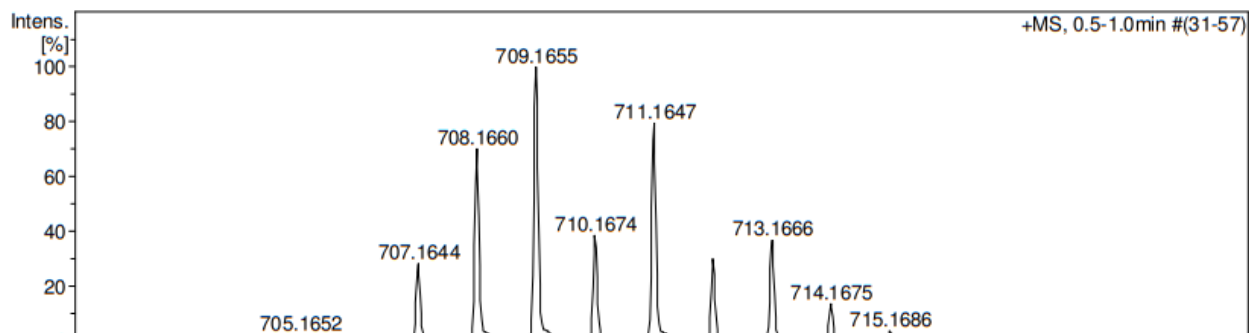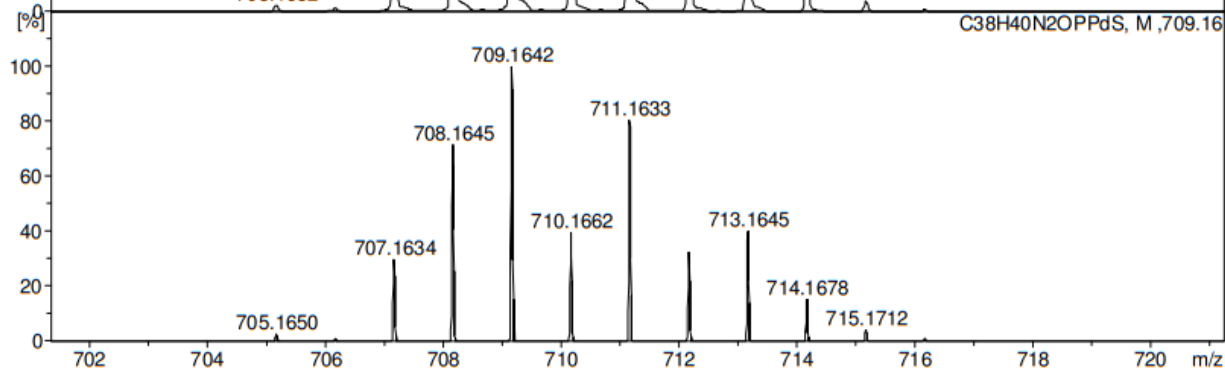

## REFERENCES

1. M. J. Frisch, G. W. Trucks, H. B. Schlegel, G. E. Scuseria, M. F. Robb, J. R. Cheeseman, et al. Gaussian 09, Revision D.01. Gaussian, Inc., Wallingford CT; 2013.
2. A. D. Becke, Density-functional thermochemistry. III. The role of exact exchange, *J. Chem. Phys.*, 1993, **98**, 5648–5652.
3. Stoe & Cie, *X-area*, Darmstadt, Germany, 2013
4. G. M. Sheldrick, Crystal structure refinement with SHELXL, *Acta Crystallogr. C*, 2015, **C71**, 3–8.
5. K. Brandenburg, *DIAMOND, Release 2.1d*. Crystal Impact GbR: Bonn, Germany, 2000.
6. S. G. Zhukov, V. V. Chernyshev, E. V. Babaev, E. J. Sonneveld, H. Z. Schenk, Application of simulated annealing approach for structure solution of molecular crystals from X-ray laboratory powder data, *Kristallogr.*, 2001, **216**, 5–9.
7. V. B. Zlokazov, V. V. Chernyshev, MRSA - a program for a full profile analysis of powder multiphase neutron-diffraction time-of-flight (direct and Fourier) spectra, *J. Appl. Crystallogr.*, 1992, **25**, 447–451.
8. K. N. Gavrilov, I. S. Mikhel, I. V. Chuchelkin, S. V. Zheglov, V. K. Gavrilov, K. P. Birin, V. A. Tafeenko, V. V. Chernyshev, N. S. Goulioukina, I. P. Beletskaya, (S)-2-[(N-arylamino)methyl]pyrrolidines-Based Phosphoramidite *P,N*-Ligand Library for Asymmetric Metal-Catalyzed Allylic Substitution and Conjugate 1,4-Addition, *ChemistrySelect*, 2016, **1**, 4173–4186.
9. K. N. Gavrilov, S. V. Zheglov, V. K. Gavrilov, M. G. Maksimova, V. A. Tafeenko, V. V. Chernyshev, K. P. Birin, I. S. Mikhel, Palladium catalyzed asymmetric reactions assisted by *P\*,P\**-bidentate bisdiamidophosphites based on 1,4-diols, *Tetrahedron*, 2017, **73**, 461–471.
10. K. N. Gavrilov, S. V. Zheglov, I. V. Chuchelkin, M. G. Maksimova, I. D. Firsin, A. N. Fitch, V. V. Chernyshev, A. V. Maximychev, A. M. Perepukhov, Tartaric acid-derived chiral phosphite-type *P,N*-ligands: behavioural features in Pd-catalyzed asymmetric transformations, *Tetrahedron: Asymmetry*, 2017, **28**, 1633–1643.
11. K. N. Gavrilov, I. S. Mikhel, S. V. Zheglov, V. K. Gavrilov, I. V. Chuchelkin, I. D. Firsin, K. P. Birin, I. S. Pytskii, K. A. Paseshnichenko, V. A. Tafeenko, V. V. Chernyshev, A. A. Shiryayev, Oxalamide-based bisdiamidophosphites: synthesis, coordination, and application in asymmetric metalocatalysis, *Org. Chem. Front.*, 2019, **6**, 1637–1648.
12. J. Lasri, A. S. Elsherbiny, N. E. Eltayeb, M. Haukka, M. E. El-Hefnawy, Synthesis and characterization of ferrocene-based Schiff base and ferrocenecarboxaldehyde oxime and their adsorptive removal of methyl blue from aqueous solution, *J. Organomet. Chem.*, 2018, **866**, 21–26.
13. E. P. Sánchez-Rodríguez, F. Hochberger-Roa, R. Corona-Sánchez, J. E. Barquera-Lozada, R. A. Toscano, M. Urrutigoñy, M. Gouygou, M. C. Ortega-Alfaro, J. G. López-Cortés, Chiral bidentate [N,S]-ferrocene ligands based on a thiazoline framework. Synthesis and use in palladium-catalyzed asymmetric allylic alkylation, *Dalton Trans.*, 2017, **46**, 1510–1519.
14. K. N. Gavrilov, I. V. Chuchelkin, V. S. Zimarev, S. V. Zheglov, V. K. Gavrilov, I. D. Firsin, A. V. Maximychev, A. M. Perepukhov, V. V. Chernyshev, N. S. Goulioukina, Diastereomeric *P\*,N,S*-tridentate diamidophosphites with a ferrocene moiety in asymmetric palladium catalysis, *J. Organomet. Chem.*, 2020, **913**, 121199.
15. C. F. Macrae, P. R. Edgington, P. McCabe, E. Pidcock, G. P. Shields, R. Taylor, M. Towler, J. van de Streek, Mercury: visualization and analysis of crystal structures, *J. Appl. Cryst.*, 2006, **39**, 453–457.
16. L. Thunberg, S. Allenmark, *Tetrahedron: Asymmetry*, 2003, **14**, 1317–1322.
17. V. N. Tsarev, S. E. Lyubimov, A. A. Shiryayev, S. V. Zheglov, O. G. Bondarev, V. A. Davankov, A. A. Kabro, S. K. Moiseev, V. N. Kalinin, K. N. Gavrilov, *P*-Chiral Monodentate Diamidophosphites – New and

## REFERENCES

- Efficient Ligands for Palladium-Catalysed Asymmetric Allylic Substitution, *Eur. J. Org. Chem.*, 2004, 2214–2222.
18. H. Aoyama, M. Tokunaga, J. Kiyosu, T. Iwasawa, Y. Obora, Y. Tsuji, Kinetic Resolution of Axially Chiral 2,2'-Dihydroxy-1,1'-biaryls by Palladium-Catalyzed Alcoholysis, *J. Am. Chem. Soc.*, 2005, **127**, 10474–10475.
19. P. R. Auburn, P. B. Mackenzie, B. Bosnich, Asymmetric synthesis. Asymmetric catalytic allylation using palladium chiral phosphine complexes, *J. Am. Chem. Soc.*, 1985, **107**, 2033–2046.
20. H. J. Seo, E.-J. Park, M. J. Kim, S. Y. Kang, S. H. Lee, H. J. Kim, K. N. Lee, M. E. Jung, M. W. Lee, M.-S. Kim, E.-J. Son, W.-K. Park, J. Kim, J. Lee, Design and Synthesis of Novel Arylpiperazine Derivatives Containing the Imidazole Core Targeting 5-HT<sub>2A</sub> Receptor and 5-HT Transporter, *J. Med. Chem.*, 2011, **54**, 6305–6318.
21. X. Wang, X. Wang, Z. Han, Z. Wang, K. Ding, Palladium-catalyzed asymmetric allylic amination: enantioselective synthesis of chiral  $\alpha$ -methylene substituted  $\beta$ -aminophosphonates, *Org. Chem. Front.*, 2017, **4**, 271–276.
22. a) F. Galsbol, P. Steenbol, B. S. Sorensen, The Preparation, Separation, and Characterization of the *le*3- and *ob*3-Isomers of Tris(trans-1,2-cyclohexanediamine)rhodium(III) Complexes, *Acta Chem. Scand.*, 1972, **26**, 3605–3611; b) J. F. Larrow, E. N. Jacobsen, (*R,R*)-*N,N'*-bis(3,5-di-*tert*-butylsalicylidene)-1,2-cyclohexanediamino manganese (III) chloride, a highly enantioselective epoxidation catalyst, *Org. Synth.*, 1998, **75**, 1.
23. C. C. Lynch, K. Balaraman, C. Wolf, Catalytic Asymmetric Allylic Amination with Isatins, Sulfonamides, Imides, Amines, and N-Heterocycles, *Org. Lett.*, 2020, **22**, 3180–3184.
24. a) T. Nemoto, T. Matsumoto, T. Masuda, T. Hitomi, K. Hatano, Y. Hamada, *P*-Chirogenic Diaminophosphine Oxide: A New Class of Chiral Phosphorus Ligands for Asymmetric Catalysis, *J. Am. Chem. Soc.*, 2004, **126**, 3690–3691; b) T. Nemoto, T. Masuda, T. Matsumoto, Y. Hamada, *J. Org. Chem.*, 2005, **70**, Development of a new class of chiral phosphorus ligands: *P*-chirogenic diaminophosphine oxides. A unique source of enantioselection in Pd-catalyzed asymmetric construction of quaternary carbons, 7172–7178; c) A. A. Zagidullin, E. S. Oshchepkova, I. V. Chuchelkin, S. A. Kondrashova, V. A. Miluykov, Sh. K. Latypov, K. N. Gavrilov, E. Hey-Hawkins, *P*-Chiral 1,7-diphosphanorbornenes: from asymmetric phospho-Diels–Alder reactions towards applications in asymmetric catalysis, *Dalton Trans.*, 2019, **48**, 4677–4684.
25. a) T. Nemoto, T. Harada, T. Matsumoto, Y. Hamada, Pd-catalyzed enantioselective synthesis of quaternary  $\alpha$ -amino acid derivatives using a phenylalanine-derived *P*-chirogenic diaminophosphine oxide, *Tetrahedron Lett.*, 2007, **48**, 6304–6307; b) K. N. Gavrilov, I. V. Chuchelkin, S. V. Zheglov, I. D. Firsin, V. S. Zimarev, V. K. Gavrilov, A. V. Maximychev, A. M. Perepukhov, N. S. Goulioukina, First *P*<sup>\*</sup>,*S*-bidentate diamidophosphite ligand in Pd-catalyzed asymmetric reactions, *Mendeleev Commun.*, 2020, **30**, 31–33.
26. N. Jain, A. V. Bedekar, Lipase catalyzed desymmetrization of roof shape *cis*-11,12-bis(hydroxymethyl)-9,10-dihydro-9,10-ethanoanthracene, *RSC Adv.*, 2015, **5**, 62678–62685.
27. a) S. Breeden, M. Wills, ESPHOS and SEMI-ESPHOS: A New Family of Mono- and Bidentate Diazaphospholidine Ligands for Asymmetric Catalysis, *J. Org. Chem.*, 1999, **64**, 9735–9738; b) L.-Y. Mei, Z.-L. Yuan, M. Shi, Chiral Imidazoline–Phosphine Ligands for Palladium-Catalyzed Asymmetric Allylic Substitutions, *Organometallics*, 2011, **30**, 6466–6475.

## REFERENCES

28. a) D. Smyth, H. Tye, C. Eldred, N. W. Alcock, M. Wills, Synthesis and applications to asymmetric catalysis of a series of mono- and bis(diazaphospholidine) ligands, *J. Chem. Soc., Perkin Trans. 1*, 2001, 2840–2849; b) J. Chen, F. Lang, D. Li, L. Cun, J. Zhu, J. Deng, J. Liao, Palladium-catalyzed asymmetric allylic nucleophilic substitution reactions using chiral tert-butanesulfinylphosphine ligands, *Tetrahedron: Asymmetry*, 2009, **20**, 1953–1956.
29. Y. Wang, M. J. P. Vaismaa, A. M. Hamalainen, J. E. Tois, R. Franzen, Utilization of IndPHOX-ligands in palladium-catalysed asymmetric allylic aminations, *Tetrahedron: Asymmetry*, 2011, **22**, 524–529.
30. a) R. Kuwano, K. Uchida, Y. Ito, Asymmetric Allylation of Unsymmetrical 1,3-Diketones Using a BINAP–Palladium Catalyst, *Org. Lett.*, 2003, **5**, 2177–2179; b) B. M. Trost, E. J. Donckele, D. A. Thaisrivongs, M. Osipov, J. T. Masters, A New Class of Non-C<sub>2</sub>-Symmetric Ligands for Oxidative and Redox-Neutral Palladium-Catalyzed Asymmetric Allylic Alkylations of 1,3-Diketones, *J. Am. Chem. Soc.*, 2015, **137**, 2776–2784.
31. P. M. de Wolff, A simplified criterion for the reliability of a powder pattern indexing, *J. Appl. Crystallogr.*, 1968, **1**, 108–113.
32. G. S. Smith, R. L. Snyder,  $F_N$ : A criterion for rating powder diffraction patterns and evaluating the reliability of powder-pattern indexing, *J. Appl. Crystallogr.*, 1979, **12**, 60–65.
33. R. A. Young, D. B. Wiles, Profile shape functions in Rietveld refinements, *J. Appl. Crystallogr.*, 1982, **15**, 430–438.
34. a) E. B. Benetskiy, C. Bolm, Synthesis of phosphorylated sulfoximines and sulfinamides and their application as ligands in asymmetric metal catalysis, *Tetrahedron:Asymmetry*, 2011, **22**, 373–378; b) K. E. Thiesen, K. Maitra, M. M. Olmstead, S. Attar, Synthesis and Characterization of New, Chiral P–N Ligands and Their Use in Asymmetric Allylic Alkylation, *Organometallics*, 2010, **29**, 6334–6342; c) M. Ramillien, N. Vanthuyne, M. Jean, D. Gherase, M. Giorgi, J.-V. Naubron, P. Piras, C. Roussel, Enantiomers of dimethyl [(2*E*)-1,3-diphenylprop-2-en-1-yl]propanedioate resulting from allylic alkylation reaction: elution order on major high-performance liquid chromatography chiral columns, *J. Chromatogr. A*, 2012, **1269**, 82–93.
35. M. Majdecki, J. Jurczak, T. Bauer, Palladium-Catalyzed Enantioselective Allylic Substitution in the Presence of Monodentate Furanoside Phosphoramidites, *ChemCatChem*, 2015, **7**, 799–807.
36. M. Ogasawara, H. L. Ngo, T. Sakamoto, T. Takahashi, W. Lin, Applications of 4,4′-(Me<sub>3</sub>Si)<sub>2</sub>-BINAP in Transition-Metal-Catalyzed Asymmetric Carbon–Carbon Bond-Forming Reactions, *Org. Lett.*, 2005, **7**, 2881–2884.
37. B. M. Trost, E. J. Donckele, D. A. Thaisrivongs, M. Osipov, J. T. Masters, A New Class of Non-C<sub>2</sub>-Symmetric Ligands for Oxidative and Redox-Neutral Palladium-Catalyzed Asymmetric Allylic Alkylations of 1,3-Diketones, *J. Am. Chem. Soc.*, 2015, **137**, 2776–2784.
